# Supplementary material for: Brønsted acid-catalyzed dynamic kinetic resolution of in situ formed acyclic N,O-hemiaminals: cascade synthesis of chiral cyclic N,O-aminals
Source: Royal Society of Chemistry journal article supplement (doi:10.1039/d1qo01135a), 2021-01-01
Supplement: d1qo01135a1.pdf [file d1qo01135a1.pdf]

# Supplementary Information

## **Brønsted Acid-catalyzed Dynamic Kinetic Resolution of *in situ* Formed Acyclic N,O-hemiaminals: Cascade Synthesis of Chiral Cyclic N,O-aminals**

Xue-Jiao Lv,<sup>[a]</sup> Yong-Chao Ming,<sup>[a]</sup> Hui-Chun Wu<sup>[a]</sup> and Yan-Kai Liu\*<sup>[a,b]</sup>

[a] Molecular Synthesis Center & Key Laboratory of Marine Drugs, Ministry of Education, School of Medicine and Pharmacy, Ocean University of China, 5 Yushan Road, Qingdao 266003, China

[b] Laboratory for Marine Drugs and Bioproducts of Qingdao National Laboratory for Marine Science and Technology, Qingdao 266003, China

\* Email: liuyankai@ouc.edu.cn

# Contents

|                                                                             |      |
|-----------------------------------------------------------------------------|------|
| A. General information: .....                                               | S3   |
| B. General procedures for the synthesis of starting materials: .....        | S4   |
| C. Optimization of racemic cyclic N,O-aminals:.....                         | S8   |
| D. Scope of racemic cyclic N,O-aminals: .....                               | S10  |
| E. Optimization of the synthesis of chiral N,O-aminals:.....                | S20  |
| F. Scope of chiral reaction conditions: .....                               | S25  |
| G. Other reactions of hemiaminal by desymmetrization: .....                 | S34  |
| H. Optimization of oxa-Michael reaction: .....                              | S35  |
| I. Determination of absolute configurations of <b>6</b> and <b>7</b> :..... | S37  |
| J. The characterization data of <b>5-7</b> : .....                          | S38  |
| K. Control experiments:.....                                                | S40  |
| L. The possible mechanism for asymmetric reaction:.....                     | S48  |
| M. Synthetic transformations: .....                                         | S50  |
| N. Large scale reaction:.....                                               | S56  |
| O. Failed substrates:.....                                                  | S58  |
| P. The stability of <b>1a</b> in present of <b>A2</b> :.....                | S62  |
| Q. NMR spectra and HPLC traces:.....                                        | S63  |
| R. Single crystal X-Ray diffraction data:.....                              | S148 |
| S. Reference:.....                                                          | S153 |

## A. General information:

The  $^1\text{H}$  and  $^{13}\text{C}$  NMR spectra were recorded at 400 MHz or 500 MHz for  $^1\text{H}$  and at 101 MHz or 125 MHz for  $^{13}\text{C}$ . The chemical shifts ( $\delta$ ) for  $^1\text{H}$  and  $^{13}\text{C}$  are given in ppm relative to residual signals of the solvents ( $\text{CDCl}_3$  at 7.26 ppm  $^1\text{H}$  NMR, 77.16 ppm  $^{13}\text{C}$  NMR). Coupling constants are given in Hz. The following abbreviations are used to indicate the multiplicity: s, singlet; d, doublet; t, triplet; q, quartet; m, multiplet. High-resolution mass spectra (HRMS) were obtained from the Waters Q-ToF Ultima Global. X-ray data were obtained from Zhongke chemical technology service center. Optical rotations are reported as follows:  $[\alpha]_{\text{D}}^{20}$  (c in g per 100 mL, solvent:  $\text{CHCl}_3$ ).

Note: NMR signals containing common solvent contaminants were list.  $\text{H}_2\text{O}$  in  $\text{CDCl}_3$  at 1.56 ppm  $^1\text{H}$  NMR; Ethyl acetate in  $\text{CDCl}_3$  at 2.05 (s), 4.12 (q), 1.26 (t) ppm  $^1\text{H}$  NMR; Dichloromethane in  $\text{CDCl}_3$  at 5.30 (s) ppm  $^1\text{H}$  NMR.

All the reactions were set up under air and using freshly distilled solvents, without any precautions to exclude moisture, unless otherwise noted open air chemistry on the bench-top. Chromatographic purification of products was accomplished using force-flow chromatography (FC) on silica gel (300-400 mesh). For thin layer chromatography (TLC) analysis throughout this work, Merck pre-coated TLC plates (silica gel 60 GF254, 0.25 mm) were used, using UV light as the visualizing agent and a phosphomolybdic acid or basic aqueous potassium permanganate ( $\text{KMnO}_4$ ) as stain developing solutions. Organic solutions were concentrated under reduced pressure on a Büchi rotary evaporator.

HPLC analyses on chiral stationary phase were performed on a Hitachi Chromaster. Daicel Chiralpak IA, IC, ID, or AD columns with *n*-hexane/*i*-PrOH as the eluent were used. HPLC traces were compared to racemic samples which prepared by mixture of two enantiomeric final products obtained using (*S*) and (*R*) catalyst.

Commercial reagents and solvents were purchased from Sigma Aldrich, Fluka, Energy Chemical and Alfa Aesar used as received, without further purification.

## B. General procedures for the synthesis of starting materials:

### General procedure for synthesis of (E)-7-substituted-7-oxohept-5-enals **1a-1o**: [1]

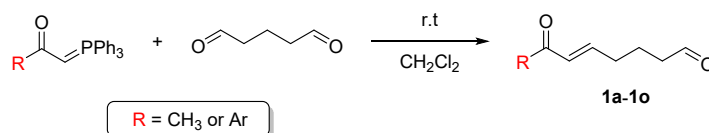

The required phosphorane (1.0 equiv) was dissolved in  $\text{CH}_2\text{Cl}_2$  (0.5 M) and added dropwise to a solution of glutaraldehyde (50% aqueous solution, 3.0 equiv) at room temperature. Then the reaction mixture was allowed to stir at room temperature for 48 h. Upon completion, the reaction mixture was washed with water and  $\text{CH}_2\text{Cl}_2$ . The organic layer was dried over anhydrous  $\text{Na}_2\text{SO}_4$ , and the solvent was evaporated under reduced pressure. The crude reaction mixture was purified by column chromatography on silica gel (petroleum ether/ethyl acetate = 3:1 to 8:1) to afford the corresponding products **1a-1o** in good yields. All these products are known compounds.

### Procedure for synthesis of (E)-2-((4-oxo-4-phenylbut-2-en-1-yl)oxy)acetaldehyde **1p**: [2-3]

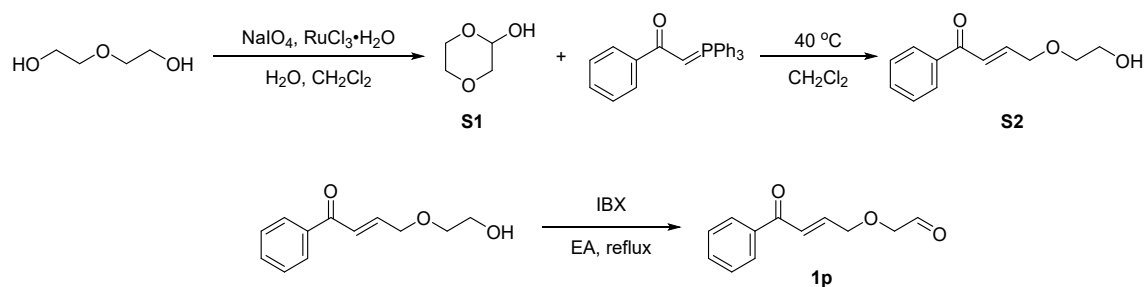

**Step 1:** To the solution of diethylene glycol (10 mmol, 1.0 equiv) were added  $\text{NaIO}_4$  (2.14 g, 10 mmol),  $\text{RuCl}_3 \cdot \text{H}_2\text{O}$  (7 mg, 0.034 mmol) in  $\text{CH}_2\text{Cl}_2$  (10 mL). The solution was stirred at 40 °C for 10 min. Water (0.54 g, 30 mmol) was added and stirred overnight. After the reaction, the reaction mixture was filtered through a celite and washed with

CH<sub>2</sub>Cl<sub>2</sub>. The filtrate was concentrated and column chromatography (petroleum ether/ethyl acetate = 1:1) to hemiacetal **S1** (521 mg, 50%) as orange oil.

**Step 2:** The ylide reagent (1.9 g, 5 mmol) was added to the solvent of hemiacetal **S1** in CH<sub>2</sub>Cl<sub>2</sub> (10 mL). The result mixture was stirred at room temperature for 48 h until no **S1** remained. After evaporation of the solvent, the residue was purified by column chromatography (petroleum ether/ethyl acetate = 3:1) to afford **S2** as orange oil.

**Step 3:** To the solvent of **S2** (1.0 equiv) in ethyl acetate, IBX (1.4 g, 1.0 equiv) was added and the reaction mixture stirred at 80 °C for about 10 h. After the reaction, the reaction mixture was filtered through a celite, concentrated and purified by column chromatography (petroleum ether/ethyl acetate = 1:1) to provide **1p** (300 mg, 30% for 2 steps) as a yellow oil.

**Procedure for synthesis of 2-((4-oxo-[1,1'-biphenyl]-1(4H)-yl)oxy)acetaldehyde **4**:**<sup>[4]</sup>

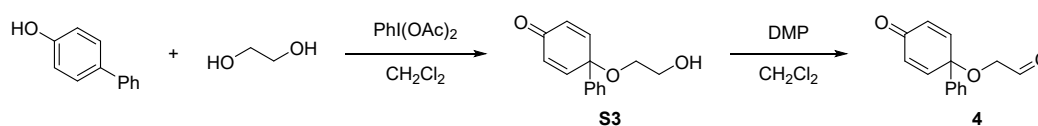

**Step 1:** Ethylene glycol (33.4 ml, 600 mmol) was added to the solution of 4-phenylphenol (20 mmol) in CH<sub>2</sub>Cl<sub>2</sub> (30 mL). Then PhI(OAc)<sub>2</sub> (9.7 g, 30 mmol) was added slowly over 5 min. The solution was then allowed to stir at room temperature for further 1 h. The solution was concentrated in vacuo and the residue was subjected to column chromatography (petroleum ether/ethyl acetate = 2:1) to provide **S3** (2.2 g, 47%) as orange oil.

**Step 2:** In a flame-dried round bottom flask, **S3** (1.0 equiv) was dissolved in CH<sub>2</sub>Cl<sub>2</sub> (0.5 M), Dess Martin periodinane (1.5 equiv) was added to the solution directly and the solution was then allowed to stir at room temperature for 1 h. The solution was filtered through celite and then concentrated in vacuo and the residue was subjected to column chromatography (petroleum ether/ethyl acetate = 2:1) to provide **4** (1.9 g, 89%) as a yellow oil.

### Synthesis of amides:

Amides **2a-2b**, **2g-2k**, **2m-2p** and **2r-2s** were obtained from commercial sources and used without further purification. Other amides were prepared according to the following procedures.

Procedure A: [5]

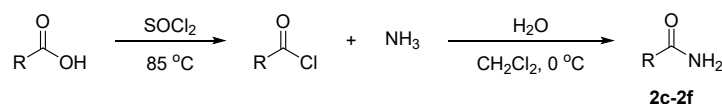

In a dry round bottom flask, acid (4 mmol) and SOCl<sub>2</sub> (3 mL) were added. The mixture was heated to reflux for 2 h. Then removed the excess SOCl<sub>2</sub> and got the crude acyl chloride. It was used to undergo the next step without further purification.

The synthesis of amide was conducted similar to a literature-known procedure. A solution of acyl chloride (prepared above or commercial) in anhydrous CH<sub>2</sub>Cl<sub>2</sub> (0.5 M) was added dropwise to an aqueous ammonia solution (25 w%, 10 equiv) at 0 °C. The resulting two-phase system was stirred vigorously at room temperature for 18 h. The reaction mixture was diluted with water, extracted with CH<sub>2</sub>Cl<sub>2</sub>. The organic layer was combined and dried over anhydrous Na<sub>2</sub>SO<sub>4</sub>. The solvent was removed under reduced pressure and colorless solid was recrystallization from ethyl acetate to afford the desired primary amides **2c-2f** in excellent yields.

Procedure B:[6-7]

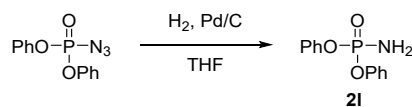

The synthesis of diphenylphosphoryl amide was conducted similar to a literature-known procedure. Diphenylphosphoryl azide (275 mg, 1 mmol) was dissolved in dry THF (5 mL) and 10% Pd/C (27 mg) was added. The complex was placed in atmospheric pressure of hydrogen and stirred for 5 h at room temperature. After the reaction was complete, Pd/C was filtered through celite and the filtrate was concentrated under reduced pressure. The

crude product was filtered with dichloromethane to give pure product as a white solid **2I** (170 mg, 68%).

Procedure C:<sup>[8]</sup>

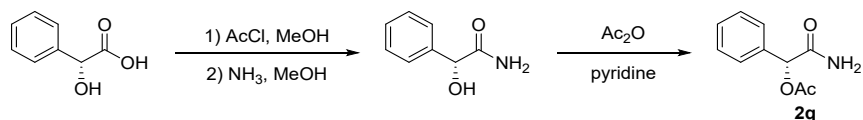

**Step 1:** The synthesis of (*R*)-acetoxymandelamide was conducted similar to a literature-known procedure. (*R*)-mandelic acid (456 mg) was dissolved in 10 mL MeOH and cooled to 0 °C. Acetyl chloride (0.57 mL) was added and the solution was allowed to warm to room temperature and stirred for 24 h. Concentration in vacuo gave a colorless liquid, which was dissolved in 5 mL NH<sub>3</sub> (in MeOH) and the solution was stirred at 80 °C for 24 h. Concentration in vacuo gave a white solid, which was recrystallized from hot EtOH to yield (*R*)-mandelamide as a white solid (228 mg, 50%).

**Step 2:** Under a nitrogen atmosphere, (*R*)-mandelamide (228 mg) was dissolved in 8 mL pyridine. Acetic anhydride (0.4 mL) was added and the solution was stirred for 18 h. Concentration in vacuo gave an off-white solid, which was recrystallized from hot EtOH to yield white crystal **2q** (148 mg, 51%).

All materials were known compounds and the characterization data were in accordance with those reported in the literatures. <sup>[1-8]</sup>

## C. Optimization of racemic cyclic N,O-aminals:

**Table S1.** Optimization of catalyst, solvent and additive

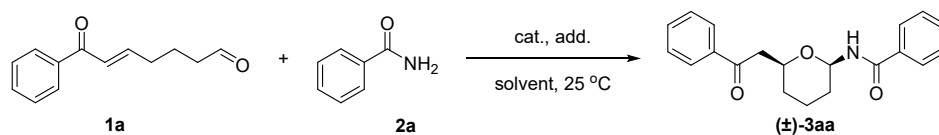

| Entry <sup>[a]</sup> | Cat.                            | Sol.               | V (mL) | Add.                            | T (h) | Y (%) <sup>[b]</sup> | dr <sup>[c]</sup> |
|----------------------|---------------------------------|--------------------|--------|---------------------------------|-------|----------------------|-------------------|
| 1                    | TsOH                            | DCE                | 0.2    | -                               | 4     | 75                   | >20:1             |
| 2                    | TfOH                            | DCE                | 0.2    | -                               | 5     | 68                   | >20:1             |
| 3                    | MsOH                            | DCE                | 0.2    | -                               | 5     | 68                   | >20:1             |
| 4                    | TFA                             | DCE                | 0.2    | -                               | 10    | 29                   | >20:1             |
| 5                    | Zn(OTf) <sub>2</sub>            | DCE                | 0.2    | -                               | >10   | 9                    | >20:1             |
| 6                    | SnCl <sub>2</sub>               | DCE                | 0.2    | -                               | 10    | 24                   | >20:1             |
| 7                    | Ti(O <i>i</i> -Pr) <sub>4</sub> | DCE                | 0.2    | -                               | NR    | -                    | -                 |
| 8                    | DPP                             | DCE                | 0.2    | -                               | 10    | 66                   | >20:1             |
| 9                    | TsOH                            | CH <sub>3</sub> CN | 0.2    | -                               | 5     | 29                   | >20:1             |
| 10                   | TsOH                            | toluene            | 0.2    | -                               | 4     | 42                   | >20:1             |
| 11                   | TsOH                            | acetone            | 0.2    | -                               | 4     | 13                   | >20:1             |
| 12                   | TsOH                            | MTBE               | 0.2    | -                               | 4     | 37                   | >20:1             |
| 13                   | TsOH                            | DCM                | 0.2    | -                               | 4     | 56                   | >20:1             |
| 14                   | TsOH                            | Et <sub>2</sub> O  | 0.2    | -                               | 5     | 46                   | >20:1             |
| 15                   | TsOH                            | THF                | 0.2    | -                               | 10    | 39                   | >20:1             |
| 16                   | TsOH                            | EA                 | 0.2    | -                               | 10    | 51                   | >20:1             |
| 17 <sup>[d]</sup>    | TsOH                            | DCE                | 0.2    | Na <sub>2</sub> SO <sub>4</sub> | 4     | 62                   | >20:1             |
| 18 <sup>[d]</sup>    | TsOH                            | DCE                | 0.2    | MgSO <sub>4</sub>               | 3.5   | 58                   | >20:1             |
| 19 <sup>[d]</sup>    | TsOH                            | DCE                | 0.2    | 3 Å MS                          | 4     | 59                   | >20:1             |
| 20 <sup>[d]</sup>    | TsOH                            | DCE                | 0.2    | 4 Å MS                          | NR    | -                    | -                 |
| 21 <sup>[d]</sup>    | TsOH                            | DCE                | 0.2    | 5 Å MS                          | NR    | -                    | -                 |



[a] Unless otherwise specified, all reactions were carried out using **1a** (0.05 mmol, 1.0 equiv), **2a** (0.06 mmol, 1.2 equiv) in solvent (0.2 mL) with cat. (20 mol%) at 25 °C. After workup, the mixture was purified by column chromatography on silica gel (petroleum ether/ethyl acetate = 3:1) to afford product (**±**)-**3aa** as a white solid. [b] Isolated yield of (**±**)-**3aa**. [c] Determined by <sup>1</sup>H NMR. [d] The reactions ran with additive (10 mg).

DCE = 1,2-Dichloroethane

DCM = Dichloromethane

MTBE = Methyl-*tert*-butylether

THF = Tetrahydrofuran

EA = Ethyl acetate

TsOH = *p*-Toluenesulfonic acid

TfOH = Trifluoromethanesulfonic acid

MsOH = Methanesulfonic acid

TFA = Trifluoroacetic acid

Zn(OTf)<sub>2</sub> = Zinc trifluoromethanesulfonate

Ti(*Oi*-Pr)<sub>4</sub> = Titanium tetraisopropanolate

DPP = Diphenyl phosphate

NR = No reaction

**Table S2.** Optimization of other conditions

| Entry <sup>[a]</sup> | Scale (mmol) | Loading of cat. (equiv) | Sol.              | V (mL) | T (h) | Y (%) <sup>[b]</sup> | dr <sup>[c]</sup> |
|----------------------|--------------|-------------------------|-------------------|--------|-------|----------------------|-------------------|
| 1 <sup>[d]</sup>     | 0.05         | 0.2                     | DCE               | 0.2    | 5     | 75                   | >20:1             |
| 2                    | 0.1          | 0.2                     | DCE               | 0.2    | 6     | 59                   | >20:1             |
| 3                    | 0.1          | 0.1                     | DCE               | 0.2    | 10    | 59                   | >20:1             |
| 4                    | 0.1          | 0.1                     | DCE               | 0.5    | 10    | 72                   | >20:1             |
| 5                    | 0.1          | 0.1                     | CHCl <sub>3</sub> | 0.5    | 10    | 77                   | >20:1             |

[a] Unless otherwise specified, all reactions were carried out using **1a** (0.1 mmol, 1.0 equiv), **2a** (0.12 mmol, 1.2 equiv) in solvent with TsOH at 25 °C. After workup, the mixture was purified by column chromatography on silica gel (petroleum ether/ethyl acetate = 3:1) to afford product (**±**)-**3aa** as a white solid. [b] Isolated yield of (**±**)-**3aa**. [c] Determined by <sup>1</sup>H NMR. [d] The reaction was carried out using **1a** (0.05 mmol, 1.0 equiv), **2a** (0.06 mmol, 1.2 equiv) in DCE (0.2 mL) with TsOH (0.2 equiv) at 25 °C.

## D. Scope of racemic cyclic N,O-aminals:

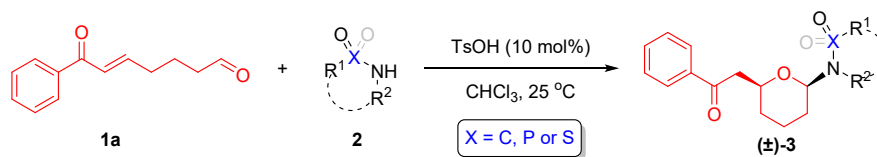

**General procedure:** A glass vial equipped with a magnetic stirring bar was charged with (*E*)-7-oxo-7-phenylhept-5-enal **1a** (0.1 mmol, 1.0 equiv), TsOH (1.7 mg, 0.1 equiv) and amide **2** (0.12 mmol, 1.2 equiv) in CHCl<sub>3</sub> (0.5 mL) and the resultant solution was stirred at 25 °C until the material **1a** disappeared. After completion of the reaction, the reaction mixture was purified by column chromatography on silica gel (petroleum ether/ethyl acetate = 7:1 to 1:1) to afford (**±**)-**3** in good to excellent yield for NMR.

**Note:** The synthesis of **3ag** and **3ah** were charged with DPP (10 mol%) as catalyst. The synthesis of **3an** and **3ao** were charged with **1a** (2.0 equiv) and amide **2** (1.0 equiv) at 25 °C. The synthesis of **3as** was charged at 0 °C.

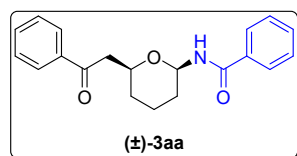

(**±**)-**3aa** was obtained as a white solid 25 mg in 77% yield after column chromatography on silica gel (petroleum ether/ethyl acetate = 3/1). <sup>1</sup>H NMR (400 MHz, CDCl<sub>3</sub>) δ 7.96 – 7.91 (m, 2H), 7.81 – 7.76 (m, 2H), 7.58 – 7.52 (m, 1H), 7.51 – 7.37 (m, 5H), 6.67 (d, *J* = 8.8 Hz, 1H), 5.41 (ddd, *J* = 10.9, 8.8, 2.1 Hz, 1H), 4.26 – 4.16 (m, 1H), 3.35 (dd, *J* = 16.3, 4.7 Hz, 1H), 3.07 (dd, *J* = 16.3, 7.9 Hz, 1H), 1.96 – 1.87 (m, 2H), 1.83 (ddq, *J* = 13.2, 4.0, 2.0 Hz, 1H), 1.73 (tdd, *J* = 13.3, 10.9, 3.8 Hz, 1H), 1.50 – 1.39 (m, 1H), 1.29 – 1.18 (m, 1H) ppm. <sup>13</sup>C NMR (101 MHz, CDCl<sub>3</sub>) δ 197.6, 166.5, 137.0, 134.0, 133.2, 131.8, 128.6, 128.5, 128.2, 127.2, 78.9, 73.9, 45.2, 31.4, 30.6, 22.7 ppm. HRMS: [M+H]<sup>+</sup> *calcd.* For C<sub>20</sub>H<sub>22</sub>NO<sub>3</sub><sup>+</sup> 324.1594, found 324.1590. The diastereomeric ratio was determined by NMR *dr* >20:1.

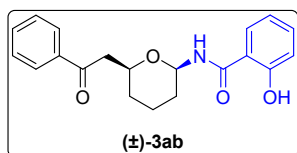

**(±)-3ab** was obtained as a white solid 19 mg in 56% yield after column chromatography on silica gel (petroleum ether/ethyl acetate = 7/1). **<sup>1</sup>H NMR** (400 MHz, CDCl<sub>3</sub>) δ 12.11 (s, 1H), 7.93 (d, *J* = 7.7 Hz, 2H), 7.55 (t, *J* = 7.3 Hz, 1H), 7.49 – 7.31 (m, 4H), 6.96 (d, *J* = 8.2 Hz, 1H), 6.82 (t, *J* = 7.6 Hz, 1H), 6.71 (d, *J* = 8.6 Hz, 1H), 5.45 – 5.32 (m, 1H), 4.22 (dt, *J* = 11.0, 6.2 Hz, 1H), 3.34 (dd, *J* = 16.5, 5.1 Hz, 1H), 3.07 (dd, *J* = 16.4, 7.4 Hz, 1H), 1.99 – 1.88 (m, 2H), 1.88 – 1.81 (m, 1H), 1.76 – 1.65 (m, 1H), 1.54 – 1.39 (m, 1H), 1.27 (qd, *J* = 13.0, 4.0 Hz, 1H) ppm. **<sup>13</sup>C NMR** (101 MHz, CDCl<sub>3</sub>) δ 197.5, 169.3, 161.9, 137.0, 134.6, 133.3, 128.6, 128.2, 125.7, 118.7, 113.8, 78.5, 74.0, 45.1, 31.3, 30.6, 22.6 ppm. **HRMS:** [M+H]<sup>+</sup> *calcd.* For C<sub>20</sub>H<sub>22</sub>NO<sub>4</sub><sup>+</sup> 340.1543, found 340.1538. The diastereomeric ratio was determined by NMR ***dr* >20:1**.

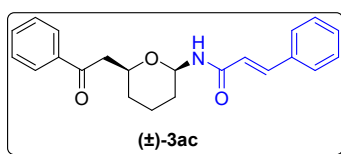

**(±)-3ac** was obtained as a white solid 20 mg in 57% yield after column chromatography on silica gel (petroleum ether/ethyl acetate = 2/1). **<sup>1</sup>H NMR** (400 MHz, CDCl<sub>3</sub>) δ 7.97 – 7.91 (m, 2H), 7.65 (d, *J* = 15.6 Hz, 1H), 7.60 – 7.53 (m, 1H), 7.51 – 7.42 (m, 4H), 7.36 (dd, *J* = 5.1, 2.0 Hz, 3H), 6.35 (d, *J* = 15.6 Hz, 1H), 6.07 (d, *J* = 9.0 Hz, 1H), 5.35 (ddd, *J* = 10.9, 9.0, 2.2 Hz, 1H), 4.21 (dddd, *J* = 10.2, 7.2, 4.7, 2.0 Hz, 1H), 3.35 (dd, *J* = 16.3, 4.8 Hz, 1H), 3.08 (dd, *J* = 16.3, 7.8 Hz, 1H), 1.96 – 1.79 (m, 3H), 1.79 – 1.65 (m, 1H), 1.45 – 1.33 (m, 1H), 1.30 – 1.19 (m, 1H) ppm. **<sup>13</sup>C NMR** (101 MHz, CDCl<sub>3</sub>) δ 197.6, 164.9, 142.2, 137.0, 134.68, 133.2, 129.9, 128.9, 128.6, 128.2, 127.9, 120.3, 78.5, 73.8, 45.2, 31.4, 30.6, 22.7 ppm. **HRMS:** [M+H]<sup>+</sup> *calcd.* For C<sub>22</sub>H<sub>24</sub>NO<sub>3</sub><sup>+</sup> 350.1751, found 350.1753. The diastereomeric ratio was determined by NMR ***dr* = 10:1**.

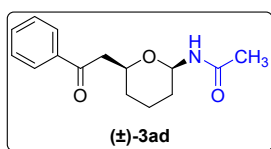

**(±)-3ad** was obtained as a white solid 16 mg in 61% yield after column chromatography on silica gel (petroleum ether/ethyl acetate = 1/1). **<sup>1</sup>H NMR** (400

MHz, CDCl<sub>3</sub>)  $\delta$  7.94 (dt,  $J$  = 8.5, 1.7 Hz, 2H), 7.57 (tq,  $J$  = 6.8, 1.7 Hz, 1H), 7.46 (tt,  $J$  = 6.6, 1.4 Hz, 2H), 5.92 (d,  $J$  = 9.1 Hz, 1H), 5.19 (ddd,  $J$  = 11.1, 9.1, 2.3 Hz, 1H), 4.15 (dddd,  $J$  = 10.9, 7.8, 4.7, 2.0 Hz, 1H), 3.32 (dd,  $J$  = 16.4, 4.8 Hz, 1H), 3.07 (dd,  $J$  = 16.3, 7.9 Hz, 1H), 1.99 (s, 3H), 1.93 – 1.85 (m, 1H), 1.85 – 1.77 (m, 2H), 1.66 (tt,  $J$  = 13.1, 3.8 Hz, 1H), 1.26 (dtdd,  $J$  = 42.4, 13.0, 11.0, 4.2 Hz, 2H) ppm. <sup>13</sup>C NMR (101 MHz, CDCl<sub>3</sub>)  $\delta$  197.6, 169.3, 137.0, 133.2, 128.6, 128.2, 78.2, 73.7, 45.2, 31.3, 30.6, 23.6, 22.7 ppm. **HRMS**: [M+H]<sup>+</sup> *calcd.* For C<sub>15</sub>H<sub>20</sub>NO<sub>3</sub><sup>+</sup> 262.1438, found 262.1436. The diastereomeric ratio was determined by NMR **dr** = 5:1.

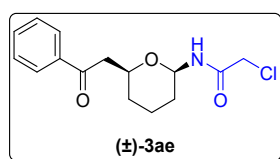

**(±)-3ae** was obtained as a white solid 16 mg in 54% yield after column chromatography on silica gel (petroleum ether/ethyl acetate = 3/1). <sup>1</sup>H NMR (400 MHz, CDCl<sub>3</sub>)  $\delta$  7.97 – 7.90 (m, 2H), 7.60 – 7.53 (m, 1H), 7.46 (t,  $J$  = 7.7 Hz, 2H), 6.92 (d,  $J$  = 8.5 Hz, 1H), 5.19 (ddd,  $J$  = 11.0, 8.9, 2.3 Hz, 1H), 4.17 (dddd,  $J$  = 11.1, 7.3, 4.9, 2.0 Hz, 1H), 4.04 (d,  $J$  = 1.8 Hz, 2H), 3.34 (dd,  $J$  = 16.5, 5.0 Hz, 1H), 3.07 (dd,  $J$  = 16.5, 7.6 Hz, 1H), 1.92 (dtd,  $J$  = 13.6, 4.1, 2.1 Hz, 1H), 1.88 – 1.79 (m, 2H), 1.69 (dddd,  $J$  = 17.0, 13.2, 8.3, 3.9 Hz, 1H), 1.39 (tdd,  $J$  = 12.8, 10.8, 4.2 Hz, 1H), 1.24 (tdd,  $J$  = 13.0, 11.0, 4.0 Hz, 1H) ppm. <sup>13</sup>C NMR (101 MHz, CDCl<sub>3</sub>)  $\delta$  197.5, 165.2, 137.0, 133.2, 128.6, 128.2, 78.6, 74.0, 45.0, 42.5, 31.1, 30.5, 22.5 ppm. **HRMS**: [M+H]<sup>+</sup> *calcd.* For C<sub>15</sub>H<sub>19</sub>ClNO<sub>3</sub><sup>+</sup> 296.1048, found 296.1054. The diastereomeric ratio was determined by NMR **dr** >20:1.

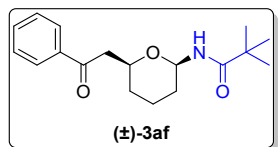

**(±)-3af** was obtained as a colorless oil 17 mg in 56% yield after column chromatography on silica gel (petroleum ether/ethyl acetate = 3/1). <sup>1</sup>H NMR (400 MHz, CDCl<sub>3</sub>)  $\delta$  7.96 (t,  $J$  = 5.9 Hz, 2H), 7.56 (t,  $J$  = 7.3 Hz, 1H), 7.46 (t,  $J$  = 7.6 Hz, 2H), 6.00 (d,  $J$  = 8.5 Hz, 1H), 5.25 – 5.12 (m, 1H), 4.14 (dd,  $J$  = 11.2, 5.8 Hz, 1H), 3.34 (dd,  $J$  = 16.2, 4.7 Hz, 1H), 3.07 (dd,  $J$  = 16.1, 8.0 Hz, 1H), 1.93 – 1.86 (m, 1H), 1.81 (d,  $J$  = 13.0 Hz, 2H), 1.75 – 1.63 (m, 1H), 1.35 – 1.25 (m, 2H), 1.19 (s, 9H) ppm. <sup>13</sup>C NMR (101 MHz, CDCl<sub>3</sub>)  $\delta$  197.9,

177.7, 137.1, 133.1, 128.6, 128.2, 78.6, 73.9, 45.2, 38.7, 31.4, 30.6, 27.4, 22.7 ppm. **HRMS:**  $[M+H]^+$  *calcd.* For  $C_{18}H_{26}NO_3^+$  304.1907, found 304.1910. The diastereomeric ratio was determined by NMR ***dr* >20:1**.

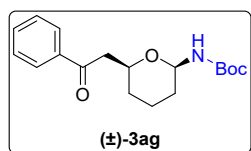

**(±)-3ag** was obtained as a colorless oil 15 mg in 47% yield after column chromatography on silica gel (petroleum ether/ethyl acetate = 6/1).  **$^1H$  NMR** (500 MHz,  $CDCl_3$ )  $\delta$  7.95 (d,  $J$  = 8.1 Hz, 2H), 7.58 – 7.54 (m, 1H), 7.46 (t,  $J$  = 7.7 Hz, 2H), 5.05 (s, 1H), 4.91 (s, 1H), 4.12 (s, 1H), 3.37 (dd,  $J$  = 16.3, 4.7 Hz, 1H), 3.16 – 3.02 (m, 1H), 1.89 (d,  $J$  = 13.9 Hz, 1H), 1.85 – 1.76 (m, 2H), 1.69 (ddd,  $J$  = 13.3, 8.6, 4.6 Hz, 1H), 1.44 (s, 9H), 1.30 (t,  $J$  = 10.8 Hz, 1H), 1.18 (dd,  $J$  = 18.7, 6.9 Hz, 1H) ppm.  **$^{13}C$  NMR** (125 MHz,  $CDCl_3$ )  $\delta$  197.8, 154.5, 137.1, 133.1, 128.6, 128.2, 80.0, 73.5, 66.5, 45.3, 31.2, 30.6, 28.3, 22.9 ppm. **HRMS:**  $[M+H]^+$  *calcd.* For  $C_{18}H_{26}NO_4^+$  320.1856, found 320.1853. The diastereomeric ratio was determined by NMR ***dr* >20:1**.

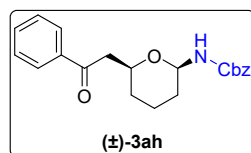

**(±)-3ah** was obtained as a white solid 19 mg in 54% yield after column chromatography on silica gel (petroleum ether/ethyl acetate = 5/1).  **$^1H$  NMR** (400 MHz,  $CDCl_3$ )  $\delta$  7.97 – 7.91 (m, 2H), 7.58 – 7.52 (m, 1H), 7.45 (m, 2H), 7.37 – 7.31 (m, 5H), 5.32 – 5.22 (m, 1H), 5.17 – 5.04 (m, 2H), 4.98 (t,  $J$  = 10.1 Hz, 1H), 4.17 – 4.10 (m, 1H), 3.35 (dd,  $J$  = 16.5, 4.7 Hz, 1H), 3.07 (dd,  $J$  = 16.5, 8.1 Hz, 1H), 1.94 – 1.75 (m, 3H), 1.75 – 1.56 (m, 1H), 1.44 – 1.25 (m, 1H), 1.24 – 1.10 (m, 1H) ppm.  **$^{13}C$  NMR** (101 MHz,  $CDCl_3$ )  $\delta$  197.7, 155.2, 137.1, 136.2, 133.2, 128.6, 128.5, 128.2, 80.4, 73.5, 67.0, 45.2, 31.2, 30.5, 22.8 ppm. **HRMS:**  $[M+H]^+$  *calcd.* For  $C_{21}H_{24}NO_4^+$  354.1700, found 354.1703. The diastereomeric ratio was determined by NMR ***dr* >20:1**.

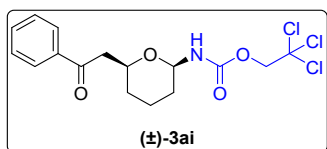

(±)-3ai was obtained as a colorless oil 32 mg in 81% yield after column chromatography on silica gel (petroleum ether/ethyl acetate = 6/1). **<sup>1</sup>H NMR** (400 MHz, CDCl<sub>3</sub>) δ 7.93 (dt, *J* = 7.2, 1.5 Hz, 2H), 7.58 – 7.53 (m, 1H), 7.45 (dd, *J* = 8.3, 6.9 Hz, 2H), 5.53 (d, *J* = 9.5 Hz, 1H), 5.07 – 4.86 (m, 1H), 4.76 (d, *J* = 12.1 Hz, 1H), 4.65 (d, *J* = 11.8 Hz, 1H), 4.21 – 4.08 (m, 1H), 3.33 (dd, *J* = 16.3, 5.1 Hz, 1H), 3.06 (dd, *J* = 16.4, 7.6 Hz, 1H), 1.97 – 1.73 (m, 3H), 1.73 – 1.61 (m, 1H), 1.36 (ddd, *J* = 20.1, 10.4, 3.5 Hz, 1H), 1.24 (ddt, *J* = 15.4, 11.1, 3.5 Hz, 1H) ppm. **<sup>13</sup>C NMR** (101 MHz, CDCl<sub>3</sub>) δ 197.7, 153.5, 137.1, 133.2, 128.6, 128.2, 95.2, 80.5, 74.6, 73.7, 45.0, 31.1, 30.4, 22.7 ppm. **HRMS:** [M+H]<sup>+</sup> *calcd.* C<sub>16</sub>H<sub>19</sub>Cl<sub>3</sub>NO<sub>4</sub><sup>+</sup> 394.0374, found 394.0376. The diastereomeric ratio was determined by NMR *dr* >20:1.

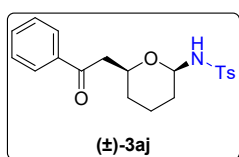

(±)-3aj was obtained as a white solid 23 mg in 62% yield after column chromatography on silica gel (petroleum ether/ethyl acetate = 3/1). **<sup>1</sup>H NMR** (400 MHz, CDCl<sub>3</sub>) δ 7.88 – 7.82 (m, 2H), 7.73 – 7.67 (m, 2H), 7.61 – 7.55 (m, 1H), 7.46 (dd, *J* = 8.4, 7.1 Hz, 2H), 7.04 (d, *J* = 8.1 Hz, 2H), 5.11 (d, *J* = 10.1 Hz, 1H), 4.82 (td, *J* = 10.4, 2.1 Hz, 1H), 4.13 – 3.99 (m, 1H), 2.97 (dd, *J* = 16.8, 6.5 Hz, 1H), 2.71 (dd, *J* = 16.7, 5.4 Hz, 1H), 2.18 (s, 3H), 1.88 (ddq, *J* = 11.6, 7.1, 2.9, 2.4 Hz, 2H), 1.73 – 1.57 (m, 2H), 1.38 – 1.09 (m, 2H) ppm. **<sup>13</sup>C NMR** (101 MHz, CDCl<sub>3</sub>) δ 197.1, 143.0, 138.8, 137.1, 133.2, 129.2, 128.6, 128.1, 127.2, 82.7, 73.1, 44.4, 31.7, 30.1, 22.9, 21.3 ppm. **HRMS:** [M+H]<sup>+</sup> *calcd.* For C<sub>20</sub>H<sub>24</sub>NO<sub>4</sub>S<sup>+</sup> 374.1421, found 374.1421. The diastereomeric ratio was determined by NMR *dr* >20:1.

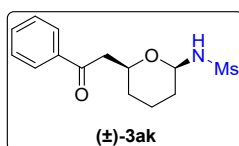

(±)-3ak was obtained as a colorless oil 18 mg in 61% yield after column chromatography on silica gel (petroleum ether/ethyl acetate = 2/1). **<sup>1</sup>H NMR** (400 MHz, CDCl<sub>3</sub>) δ 7.94 (d, *J* = 7.1 Hz, 2H), 7.60 – 7.55 (m, 1H), 7.47 (t, *J* = 7.5 Hz, 2H), 5.05 (d,

$J = 10.4$  Hz, 1H), 4.70 (td,  $J = 10.6, 2.2$  Hz, 1H), 4.16 (ddd,  $J = 8.9, 3.8, 1.9$  Hz, 1H), 3.28 (dd,  $J = 15.8, 8.4$  Hz, 1H), 3.01 – 2.91 (m, 1H), 2.81 (s, 3H), 1.98 – 1.82 (m, 2H), 1.75 – 1.64 (m, 3H), 1.36 – 1.27 (m, 1H) ppm.  $^{13}\text{C}$  NMR (101 MHz,  $\text{CDCl}_3$ )  $\delta$  197.8, 137.0, 133.4, 128.7, 128.2, 82.5, 73.9, 44.5, 42.9, 31.2, 30.3, 22.8 ppm. **HRMS:**  $[\text{M}+\text{H}]^+$  *calcd.* For  $\text{C}_{14}\text{H}_{20}\text{NO}_4\text{S}^+$  298.1108, found 298.1107. The diastereomeric ratio was determined by NMR ***dr* >20:1**.

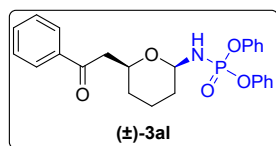

**(±)-3al** was obtained as a white solid 37 mg in 82% yield after column chromatography on silica gel (petroleum ether/ethyl acetate = 2/1).  $^1\text{H}$  NMR (500 MHz,  $\text{CDCl}_3$ )  $\delta$  7.94 – 7.90 (m, 2H), 7.58 – 7.53 (m, 1H), 7.44 (t,  $J = 7.8$  Hz, 2H), 7.37 – 7.28 (m, 3H), 7.27 – 7.18 (m, 5H), 7.16 (tt,  $J = 7.3, 1.2$  Hz, 1H), 7.13 – 7.08 (m, 1H), 4.67 (tdd,  $J = 10.6, 8.1, 2.3$  Hz, 1H), 4.14 (dtd,  $J = 11.2, 6.3, 2.0$  Hz, 1H), 3.83 (dd,  $J = 12.3, 10.8$  Hz, 1H), 3.22 (dd,  $J = 16.4, 5.8$  Hz, 1H), 2.96 (dd,  $J = 16.4, 6.6$  Hz, 1H), 1.90 – 1.83 (m, 1H), 1.78 (dd,  $J = 12.8, 3.0$  Hz, 1H), 1.76 – 1.71 (m, 1H), 1.64 (qt,  $J = 13.3, 3.9$  Hz, 1H), 1.35 – 1.26 (m, 2H), 1.26 – 1.18 (m, 1H) ppm.  $^{13}\text{C}$  NMR (101 MHz,  $\text{CDCl}_3$ )  $\delta$  197.8, 150.7, 150.6, 137.1, 133.2, 129.6, 129.5, 128.6, 128.2, 125.0, 124.9, 120.5, 120.5, 120.4, 82.0, 73.7, 44.9, 33.2, 30.3, 23.0 ppm. **HRMS:**  $[\text{M}+\text{H}]^+$  *calcd.* For  $\text{C}_{25}\text{H}_{27}\text{NO}_5\text{P}^+$  452.1621, found 452.1628. The diastereomeric ratio was determined by NMR ***dr* >20:1**.

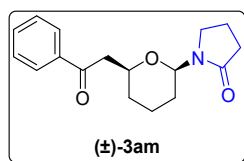

**(±)-3am** was obtained as a colorless oil 18 mg in 63% yield after column chromatography on silica gel (petroleum ether/ethyl acetate = 1/1).  $^1\text{H}$  NMR (400 MHz,  $\text{CDCl}_3$ )  $\delta$  7.96 – 7.91 (m, 2H), 7.58 – 7.51 (m, 1H), 7.44 (dd,  $J = 8.4, 7.0$  Hz, 2H), 5.24 (dd,  $J = 9.8, 3.5$  Hz, 1H), 4.14 (dddd,  $J = 11.1, 7.4, 5.0, 2.1$  Hz, 1H), 3.45 (ddd,  $J = 9.5, 7.7, 6.4$  Hz, 1H), 3.36 (dt,  $J = 9.5, 6.9$  Hz, 1H), 3.27 (dd,  $J = 15.9, 5.0$  Hz, 1H), 3.04 (dd,  $J = 15.9, 7.5$  Hz, 1H), 2.41 – 2.32 (m, 2H), 2.01 – 1.94 (m, 2H), 1.90 (dp,  $J = 13.1, 3.1$  Hz, 1H), 1.82 – 1.73 (m, 1H), 1.67 (dtd,  $J = 12.9, 8.5, 3.9$  Hz, 1H), 1.56 (ddt,  $J = 12.5, 10.2, 4.7$  Hz, 2H), 1.20 (tdd,  $J = 12.7, 11.1, 4.1$  Hz, 1H) ppm.  $^{13}\text{C}$  NMR (101 MHz,  $\text{CDCl}_3$ )  $\delta$  197.9, 175.0, 137.2, 133.1,

128.5, 128.3, 79.7, 74.2, 45.1, 42.5, 31.6, 30.6, 28.4, 22.6, 18.1 ppm. **HRMS:**  $[M+H]^+$  *calcd.* For  $C_{17}H_{22}NO_3^+$  288.1594, found 288.1596. The diastereomeric ratio was determined by NMR **dr >20:1**.

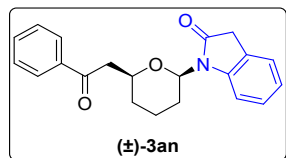

**(±)-3an** was obtained as a colorless oil 14 mg in 42% yield after column chromatography on silica gel (petroleum ether/ethyl acetate = 6/1). **<sup>1</sup>H NMR** (400 MHz,  $CDCl_3$ )  $\delta$  7.95 – 7.91 (m, 2H), 7.55 – 7.50 (m, 1H), 7.40 (dd,  $J = 8.4, 7.1$  Hz, 2H), 7.26 – 7.18 (m, 3H), 7.01 (td,  $J = 7.4, 1.4$  Hz, 1H), 5.65 (dd,  $J = 11.4, 2.6$  Hz, 1H), 4.25 (dddd,  $J = 11.1, 7.3, 5.4, 2.1$  Hz, 1H), 3.52 (s, 2H), 3.36 (dd,  $J = 16.2, 5.4$  Hz, 1H), 3.12 (dd,  $J = 16.2, 6.9$  Hz, 1H), 2.20 (tdd,  $J = 12.9, 11.2, 4.2$  Hz, 1H), 2.07 – 1.98 (m, 1H), 1.89 (ddq,  $J = 13.2, 3.8, 1.9$  Hz, 1H), 1.81 (tt,  $J = 13.2, 3.9$  Hz, 1H), 1.73 – 1.67 (m, 1H), 1.43 (tdd,  $J = 12.8, 11.1, 4.0$  Hz, 1H) ppm. **<sup>13</sup>C NMR** (101 MHz,  $CDCl_3$ )  $\delta$  197.6, 174.0, 142.5, 137.1, 133.2, 128.5, 128.3, 127.5, 124.4, 124.3, 122.2, 112.0, 80.9, 75.0, 45.0, 36.0, 30.7, 27.4, 22.7 ppm. **HRMS:**  $[M+H]^+$  *calcd.* For  $C_{21}H_{22}NO_3^+$  336.1594, found 336.1593. The diastereomeric ratio was determined by NMR **dr >20:1**.

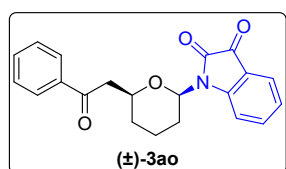

**(±)-3ao** was obtained as a yellow solid 14 mg in 40% yield after column chromatography on silica gel (petroleum ether/ethyl acetate = 3/1). **<sup>1</sup>H NMR** (400 MHz,  $CDCl_3$ )  $\delta$  7.97 – 7.90 (m, 2H), 7.60 (dd,  $J = 7.5, 1.4$  Hz, 1H), 7.56 – 7.50 (m, 2H), 7.41 (dd,  $J = 8.4, 7.0$  Hz, 2H), 7.27 (d,  $J = 4.4$  Hz, 1H), 7.11 (dd,  $J = 7.6, 0.9$  Hz, 1H), 5.55 (dd,  $J = 11.4, 2.4$  Hz, 1H), 4.28 (dtd,  $J = 11.7, 6.1, 2.1$  Hz, 1H), 3.34 (dd,  $J = 16.3, 5.9$  Hz, 1H), 3.13 (dd,  $J = 16.3, 6.1$  Hz, 1H), 2.22 (tdd,  $J = 13.8, 11.0, 4.3$  Hz, 1H), 2.13 – 1.99 (m, 1H), 1.94 – 1.71 (m, 3H), 1.56 – 1.40 (m, 1H) ppm. **<sup>13</sup>C NMR** (101 MHz,  $CDCl_3$ )  $\delta$  197.4, 183.1, 156.9, 149.6, 138.2, 137.0, 133.3, 128.6, 128.2, 125.3, 123.7, 117.7, 113.8, 81.5, 75.0, 44.6, 30.4,



27.5, 22.6 ppm. **HRMS:**  $[M+H]^+$  *calcd.* For  $C_{21}H_{20}NO_4^+$  350.1387, found 350.1389. The diastereomeric ratio was determined by NMR **dr >20:1**.

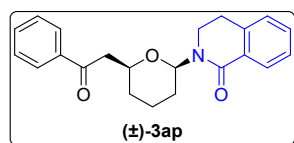

**(±)-3ap** was obtained as a colorless oil 16 mg in 46% yield after column chromatography on silica gel (petroleum ether/ethyl acetate = 4/1). **<sup>1</sup>H NMR** (400 MHz,  $CDCl_3$ )  $\delta$  8.06 (dd,  $J = 7.8, 1.5$  Hz, 1H), 7.97 (dq,  $J = 8.6, 1.8$  Hz, 2H), 7.57 – 7.52 (m, 1H), 7.47 – 7.37 (m, 3H), 7.32 (td,  $J = 7.6, 1.3$  Hz, 1H), 7.16 (d,  $J = 7.5$  Hz, 1H), 5.86 (dd,  $J = 10.9, 2.5$  Hz, 1H), 4.22 (dddd,  $J = 12.4, 7.3, 5.5, 1.9$  Hz, 1H), 3.60 (ddd,  $J = 12.0, 6.7, 5.1$  Hz, 1H), 3.44 (ddd,  $J = 12.3, 9.4, 4.8$  Hz, 1H), 3.28 (dd,  $J = 15.4, 5.4$  Hz, 1H), 3.08 (dd,  $J = 15.4, 6.9$  Hz, 1H), 2.87 (qdd,  $J = 15.7, 6.4, 4.9$  Hz, 2H), 1.99 – 1.89 (m, 1H), 1.83 – 1.74 (m, 2H), 1.72 – 1.64 (m, 1H), 1.61 – 1.52 (m, 1H), 1.34 – 1.24 (m, 1H) ppm. **<sup>13</sup>C NMR** (101 MHz,  $CDCl_3$ )  $\delta$  198.2, 163.7, 138.5, 137.4, 133.1, 131.8, 129.5, 128.6, 128.5, 128.4, 127.0, 126.8, 81.3, 74.7, 45.2, 39.7, 30.7, 28.4, 28.0, 22.6 ppm. **HRMS:**  $[M+H]^+$  *calcd.* For  $C_{22}H_{24}NO_3^+$  350.1751, found 350.1750. The diastereomeric ratio was determined by NMR **dr >20:1**.

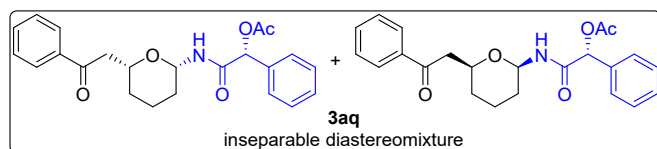

**3aq** was obtained as a colorless oil 20 mg in 51% yield after column chromatography on silica gel (petroleum ether/ethyl acetate = 2/1). **<sup>1</sup>H NMR** (400 MHz,  $CDCl_3$ )  $\delta$  7.99 – 7.90 (m, 2H), 7.59 – 7.53 (m, 1H), 7.43 (dddd,  $J = 20.1, 10.1, 6.9, 5.0$  Hz, 4H), 7.36 – 7.32 (m, 3H), 6.60 (dd,  $J = 31.9, 9.0$  Hz, 1H), 6.08 (d,  $J = 3.4$  Hz, 1H), 5.19 (dddd,  $J = 11.0, 8.9, 4.0, 2.2$  Hz, 1H), 4.19 – 4.06 (m, 1H), 3.31 (ddd,  $J = 16.0, 5.8, 4.9$  Hz, 1H), 3.10 – 3.00 (m, 1H), 2.16 (d,  $J = 1.0$  Hz, 3H), 1.84 (ddt,  $J = 29.7, 13.8, 3.4$  Hz, 3H), 1.67 (qt,  $J = 13.0, 3.8$  Hz, 1H), 1.44 – 1.28 (m, 1H), 1.26 – 1.14 (m, 1H) ppm. **<sup>13</sup>C NMR** (101 MHz,  $CDCl_3$ )  $\delta$  197.8, 197.6, 169.1, 169.0, 167.6, 137.1, 137.0, 135.5, 135.3, 133.2, 133.2, 129.1, 129.0, 128.8, 128.8, 128.6, 128.6, 128.6, 128.6, 128.2, 128.2, 127.7, 127.4, 78.5, 75.3, 75.2, 74.2, 74.1, 45.1, 45.0, 31.3, 30.5, 30.5, 22.5, 22.5, 21.1, 21.0

ppm. **HRMS**:  $[M+H]^+$  *calcd.* For  $C_{23}H_{26}NO_5^+$  396.1805, found 396.1803. The diastereomeric ratio was determined by NMR **dr** = **1:1**.

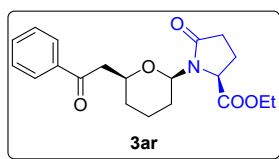

**3ar** was obtained as a colorless oil 4 mg in 11% yield after column chromatography on silica gel (petroleum ether/ethyl acetate = 1/1). **<sup>1</sup>H NMR** (400 MHz,  $CDCl_3$ )  $\delta$  7.91 (dd,  $J$  = 7.4, 1.7 Hz, 2H), 7.59 – 7.54 (m, 1H), 7.46 (t,  $J$  = 7.7 Hz, 2H), 5.27 – 5.21 (m, 1H), 4.24 (dd,  $J$  = 8.9, 1.7 Hz, 1H), 4.10 (ddt,  $J$  = 21.5, 10.8, 7.1 Hz, 2H), 3.99 (dq,  $J$  = 10.8, 7.1 Hz, 1H), 3.24 (dd,  $J$  = 16.4, 5.6 Hz, 1H), 2.90 (dd,  $J$  = 16.4, 6.9 Hz, 1H), 2.67 (dt,  $J$  = 16.6, 9.9 Hz, 1H), 2.36 (ddd,  $J$  = 16.6, 9.6, 2.1 Hz, 1H), 2.22 (dq,  $J$  = 13.1, 9.6 Hz, 1H), 2.04 (ddt,  $J$  = 13.2, 9.4, 1.9 Hz, 1H), 1.95 – 1.86 (m, 1H), 1.76 – 1.60 (m, 5H), 1.21 (t,  $J$  = 7.1 Hz, 3H) ppm. **<sup>13</sup>C NMR** (101 MHz,  $CDCl_3$ )  $\delta$  197.2, 174.9, 172.6, 137.0, 133.2, 128.6, 128.1, 81.1, 74.1, 61.1, 57.1, 44.9, 30.6, 30.3, 28.5, 23.5, 22.4, 14.1 ppm. **HRMS**:  $[M+H]^+$  *calcd.* For  $C_{20}H_{26}NO_5^+$  360.1805, found 360.1803.  $[\alpha]_D^{20}$  -8.91 ( $c$  = 0.78 in  $CHCl_3$ ). The enantiomeric ratio was determined by HPLC analysis on Daicel Chiralpak IB column [*n*-hexane/*i*-PrOH = 95/5, 1 mL/min],  $\lambda$  = 240 nm,  $t_{major}$  = 48.43 min,  $t_{minor}$  = 44.37 min, **er** >**99.9:0.1**. The diastereomeric ratio was determined by NMR **dr** >**20:1**.

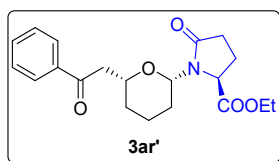

**3ar'** was obtained as a colorless oil 7 mg in 19% yield after column chromatography on silica gel (petroleum ether/ethyl acetate = 1/1). **<sup>1</sup>H NMR** (400 MHz,  $CDCl_3$ )  $\delta$  7.97 – 7.92 (m, 2H), 7.60 – 7.53 (m, 1H), 7.49 – 7.42 (m, 2H), 5.28 (dd,  $J$  = 11.3, 2.1 Hz, 1H), 4.36 – 4.30 (m, 1H), 4.26 – 4.11 (m, 3H), 3.28 (dd,  $J$  = 15.9, 5.4 Hz, 1H), 3.01 (dd,  $J$  = 15.8, 7.1 Hz, 1H), 2.65 – 2.49 (m, 1H), 2.38 – 2.20 (m, 2H), 2.04 – 1.94 (m, 1H), 1.92 – 1.81 (m, 1H), 1.80 – 1.72 (m, 1H), 1.72 – 1.57 (m, 2H), 1.32 – 1.14 (m, 5H) ppm. **<sup>13</sup>C NMR** (101 MHz,  $CDCl_3$ )  $\delta$  197.8, 175.4, 173.3, 137.2, 133.1, 128.5, 128.3, 80.2, 74.4, 61.4, 56.3, 45.1, 30.6, 30.0, 29.0, 24.5, 22.7, 14.2 ppm. **HRMS**:  $[M+H]^+$  *calcd.* For  $C_{20}H_{26}NO_5^+$  360.1805, found 360.1811.  $[\alpha]_D^{20}$  -10.86 ( $c$  = 0.70 in  $CHCl_3$ ). The enantiomeric ratio was determined

by HPLC analysis on Daicel Chiralpak IB column [*n*-hexane/*i*-PrOH = 95/5, 1 mL/min],  $\lambda$  = 240 nm,  $t_{major}$  = 36.29 min,  $t_{minor}$  = 34.07 min, **er >99.7:0.3**. The diastereomeric ratio was determined by NMR **dr >20:1**.

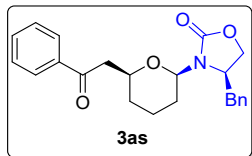

**3as** was obtained as a colorless oil 28 mg in 74% yield after column chromatography on silica gel (petroleum ether/ethyl acetate = 3/1). **<sup>1</sup>H NMR** (400 MHz, CDCl<sub>3</sub>)  $\delta$  7.99 – 7.92 (m, 2H), 7.59 – 7.50 (m, 1H), 7.43 (t,  $J$  = 7.6 Hz, 2H), 7.36 – 7.21 (m, 3H), 7.17 – 7.10 (m, 2H), 5.05 (dd,  $J$  = 10.6, 2.7 Hz, 1H), 4.22 – 3.93 (m, 4H), 3.29 (td,  $J$  = 16.2, 4.6 Hz, 2H), 3.08 (dd,  $J$  = 15.8, 6.8 Hz, 1H), 2.60 (dd,  $J$  = 14.0, 9.5 Hz, 1H), 2.01 (dq,  $J$  = 13.7, 3.4 Hz, 1Hk), 1.92 – 1.64 (m, 4H), 1.31 (tdd,  $J$  = 14.5, 11.9, 4.9 Hz, 1H) ppm. **<sup>13</sup>C NMR** (101 MHz, CDCl<sub>3</sub>)  $\delta$  198.0, 157.0, 137.2, 136.2, 133.2, 129.2, 128.8, 128.6, 128.3, 127.0, 82.8, 74.7, 66.6, 54.5, 44.8, 39.9, 30.6, 28.5, 22.9 ppm. **HRMS**: [M+H]<sup>+</sup> *calcd.* For C<sub>23</sub>H<sub>26</sub>NO<sub>4</sub><sup>+</sup> 380.1856, found 380.1857. **[ $\alpha$ ]<sub>D</sub><sup>20</sup>** -27.03 ( $c$  = 1.44 in CHCl<sub>3</sub>). The enantiomeric ratio was determined by HPLC analysis on Daicel Chiralpak IB column [*n*-hexane/*i*-PrOH = 65/35, 1 mL/min],  $\lambda$  = 205 nm,  $t_{major}$  = 7.55 min,  $t_{minor}$  = 8.70 min, **er >99.9:0.1**. The diastereomeric ratio was determined by <sup>1</sup>H NMR **dr >20:1**.

## E. Optimization of the synthesis of chiral N,O-aminals:

Scheme S1. Screening of amides

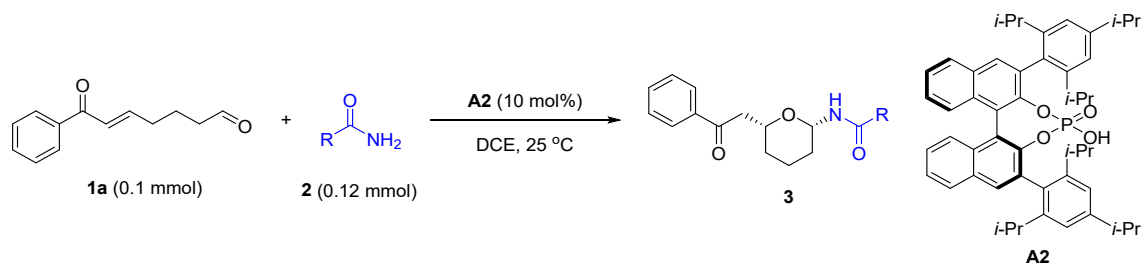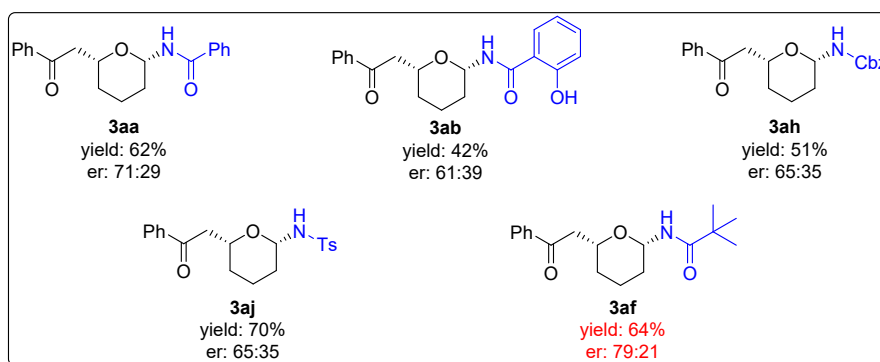

**General procedure:** All reactions were carried out using **1a** (0.1 mmol, 1.0 equiv), **2** (0.12 mmol, 1.2 equiv) in DCE (0.5 mL) with **A2** (10 mol%) at 25 °C. After workup, the mixture was purified by column chromatography on silica gel to afford product **3** for HPLC analysis. And pivalic amide **2f** was chosen to optimize other conditions.

**Table S3.** Screening of catalysts

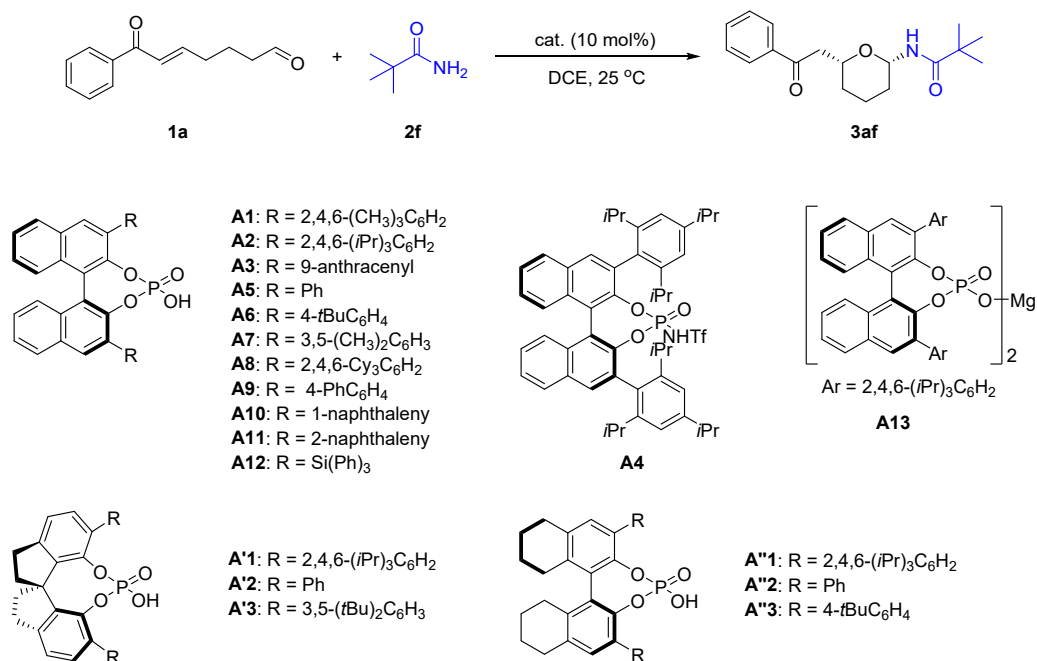

| entry <sup>[a]</sup> | Cat.       | T (d) | Y (%) <sup>[b]</sup> | er <sup>[c]</sup> | dr <sup>[d]</sup> |
|----------------------|------------|-------|----------------------|-------------------|-------------------|
| 1                    | <b>A1</b>  | 2     | 36                   | 69:31             | >20:1             |
| 2                    | <b>A2</b>  | 2     | 64                   | 79:21             | >20:1             |
| 3                    | <b>A3</b>  | 2     | 64                   | 66:34             | >20:1             |
| 4                    | <b>A4</b>  | 2     | <5                   | 66:34             | >20:1             |
| 5                    | <b>A5</b>  | 1     | 76                   | 58:42             | >20:1             |
| 6                    | <b>A6</b>  | 1     | 64                   | 57:43             | >20:1             |
| 7                    | <b>A7</b>  | 2     | 46                   | 62:38             | >20:1             |
| 8                    | <b>A8</b>  | 2     | 54                   | 72:28             | >20:1             |
| 9                    | <b>A9</b>  | 2     | 64                   | 55:45             | >20:1             |
| 10                   | <b>A10</b> | 2     | 86                   | 57:43             | >20:1             |
| 11                   | <b>A11</b> | 2     | 57                   | 59:41             | >20:1             |
| 12                   | <b>A12</b> | -     | NR                   | -                 | --                |
| 13                   | <b>A13</b> | 2     | <5                   | 78:22             | >20:1             |
| 14                   | <b>A'1</b> | 2     | 20                   | 53:47             | >20:1             |

|    |             |   |    |           |       |
|----|-------------|---|----|-----------|-------|
| 15 | <b>A'2</b>  | 2 | 50 | 57.5:42.5 | >20:1 |
| 16 | <b>A'3</b>  | - | NR | -         | -     |
| 17 | <b>A''1</b> | 2 | 60 | 75:25     | >20:1 |
| 18 | <b>A''2</b> | 2 | 40 | 57:43     | >20:1 |
| 19 | <b>A''3</b> | 2 | 40 | 54:46     | >20:1 |

[a] Unless otherwise specified, all reactions were carried out using **1a** (0.1 mmol, 1.0 equiv), **2f** (0.12 mmol, 1.2 equiv) in DCE (0.5 mL) with cat. (10 mol%) at 25 °C. After workup, the mixture was purified by column chromatography on silica gel (petroleum ether/ethyl acetate = 3:1) to afford product **3af** as a white solid. [b] Isolated yield of **3af**. [c] Determined by HPLC analyses of isolated compound **3af** on chiral stationary phases. [d] Determined by <sup>1</sup>H NMR.

**Table S4.** Optimization of other reaction conditions

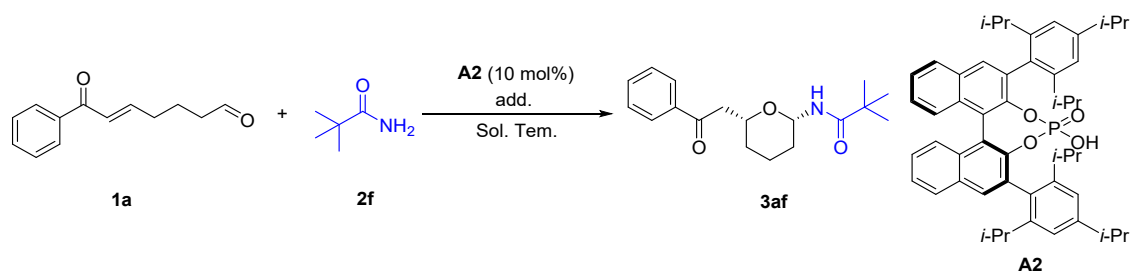

| entry <sup>[a]</sup> | Tem.<br>(°C) | Sol.                       | Add.                           | T (d) | Y (%) <sup>[b]</sup> | er <sup>[c]</sup> | dr <sup>[d]</sup> |
|----------------------|--------------|----------------------------|--------------------------------|-------|----------------------|-------------------|-------------------|
| 1 <sup>[e]</sup>     | 25           | DCE                        | -                              | 2     | 50                   | 77:23             | >20:1             |
| 2                    | 25           | DCE                        | -                              | 2     | 78                   | 79:21             | >20:1             |
| 3 <sup>[f]</sup>     | 25           | DCE                        | -                              | 2     | 71                   | 79:21             | >20:1             |
| 4                    | 0            | DCE                        | -                              | 6     | 57                   | 90:10             | >20:1             |
| 5                    | -20          | DCE                        | -                              | 6     | <5                   | 93:7              | >20:1             |
| 6                    | 40           | DCE                        | -                              | 2     | 70                   | 73:27             | >20:1             |
| 7                    | 0            | DCM                        | -                              | 6     | 29                   | 87:13             | >20:1             |
| 8                    | 0            | toluene                    | -                              | 6     | 64                   | 90:10             | >20:1             |
| 9                    | 0            | PhOCH <sub>3</sub>         | -                              | 6     | 52                   | 90:10             | >20:1             |
| 10                   | 0            | Et <sub>2</sub> O          | -                              | 6     | 29                   | 88:12             | >20:1             |
| 11                   | 0            | EA                         | -                              | -     | <5                   | 87:13             | >20:1             |
| 12                   | 0            | CH <sub>3</sub> CN         | -                              | -     | NR                   | -                 | -                 |
| 13                   | 0            | acetone                    | -                              | -     | trace                | -                 | -                 |
| 14                   | 0            | THF                        | -                              | -     | NR                   | -                 | -                 |
| 15                   | 0            | MTBE                       | -                              | 6     | 59                   | 95:5              | >20:1             |
| 16                   | 0            | MTBE<br>+Et <sub>2</sub> O | -                              | 6     | 66                   | 93:7              | >20:1             |
| 17                   | 0            | MTBE                       | FeCl <sub>3</sub><br>(20 mol%) | 6     | 40                   | 64:36             | >20:1             |

|                   |   |      |                                                   |   |    |       |       |
|-------------------|---|------|---------------------------------------------------|---|----|-------|-------|
| 18                | 0 | MTBE | 3 Å MS (5 mg)                                     | 6 | 29 | 92:8  | >20:1 |
| 19                | 0 | MTBE | 4 Å MS (5 mg)                                     | 6 | 50 | 93:7  | >20:1 |
| 20                | 0 | MTBE | 4 Å MS (10 mg)                                    | 6 | 20 | 90:10 | >20:1 |
| 21                | 0 | MTBE | 4 Å MS (20 mg)                                    | - | NR | -     | -     |
| 22                | 0 | MTBE | 5 Å MS (5 mg)                                     | 6 | 36 | 89:11 | >20:1 |
| 23                | 0 | MTBE | MgSO <sub>4</sub> (5 mg)                          | 6 | 57 | 94:6  | >20:1 |
| 24                | 0 | MTBE | Na <sub>2</sub> SO <sub>4</sub> (5 mg)            | 6 | 64 | 91:9  | >20:1 |
| 25                | 0 | MTBE | (CF <sub>3</sub> ) <sub>2</sub> CHOH<br>(20 mol%) | 6 | 50 | 91:9  | >20:1 |
| 26                | 0 | MTBE | (CH <sub>2</sub> OH) <sub>2</sub><br>(20 mol%)    | 6 | 50 | 93:7  | >20:1 |
| 27                | 0 | MTBE | H <sub>2</sub> O<br>(1.0 equiv)                   | 6 | 40 | 93:7  | >20:1 |
| 28 <sup>[g]</sup> | 0 | MTBE | -                                                 | 6 | 77 | 89:11 | >20:1 |
| 29 <sup>[h]</sup> | 0 | MTBE | -                                                 | 6 | 21 | 92:8  | >20:1 |
| 30 <sup>[i]</sup> | 0 | MTBE | -                                                 | 9 | 47 | 95:5  | >20:1 |

[a] Unless otherwise specified, all reactions were carried out using **1a** (0.1 mmol, 1.0 equiv), **2f** (0.12 mmol, 1.2 equiv) in solvent (0.5 mL) with **A2** (10 mol%). After workup, the mixture was purified by column chromatography on silica gel (petroleum ether/ethyl acetate = 3:1) to afford product **3af** as a white solid. [b] Isolated yield of **3af**. [c] Determined by HPLC analyses of isolated compound **3af** on chiral stationary phases. [d] Determined by <sup>1</sup>H NMR. [e] Reactions were carried out using **1a** (0.2 mmol, 2.0 equiv) and **2f** (0.1 mmol, 1.0 equiv). [f] Reactions were carried out using **1a** (0.1 mmol, 1.0 equiv) and **2f** (0.2 mmol, 2.0 equiv). [g] Reactions were carried out in MTBE (0.2 mL). [h] Reactions were carried out in MTBE (1.0 mL). [i] Reactions were carried out with **A2** (5 mol%).



## F. Scope of chiral reaction conditions:

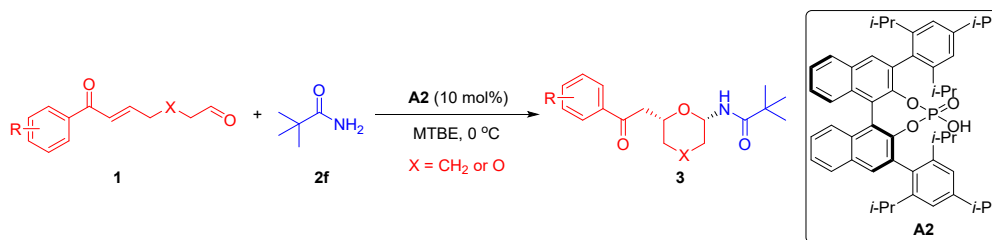

**General procedure:** A glass vial equipped with a magnetic stirring bar was charged with (*E*)-7-oxo-7-phenylhept-5-enal **1** (0.1 mmol, 1.0 equiv) and amide **2f** (0.12 mmol, 1.2 equiv) in MTBE (0.5 mL) with **A2** (10 mol%) at 0 °C. After completion of the reaction, the reaction mixture was purified by column chromatography on silica gel (petroleum ether/ethyl acetate = 4:1 to 2:1) to afford **3** for NMR and HPLC analysis.

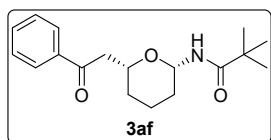

**3af** was obtained as a white solid 18 mg in 59% yield after column chromatography on silica gel (petroleum ether/ethyl acetate = 3/1).  $^1\text{H NMR}$  (400 MHz,  $\text{CDCl}_3$ )  $\delta$  7.96 (t,  $J = 5.9$  Hz, 2H), 7.56 (t,  $J = 7.3$  Hz, 1H), 7.46 (t,  $J = 7.6$  Hz, 2H), 6.00 (d,  $J = 8.5$  Hz, 1H), 5.25 – 5.12 (m, 1H), 4.14 (dd,  $J = 11.2, 5.8$  Hz, 1H), 3.34 (dd,  $J = 16.2, 4.7$  Hz, 1H), 3.07 (dd,  $J = 16.1, 8.0$  Hz, 1H), 1.93 – 1.86 (m, 1H), 1.81 (d,  $J = 13.0$  Hz, 2H), 1.75 – 1.63 (m, 1H), 1.35 – 1.25 (m, 2H), 1.19 (s, 9H) ppm.  $^{13}\text{C NMR}$  (101 MHz,  $\text{CDCl}_3$ )  $\delta$  197.9, 177.7, 137.1, 133.1, 128.6, 128.2, 78.6, 73.9, 45.2, 38.7, 31.4, 30.6, 27.4, 22.7 ppm. **HRMS:**  $[\text{M}+\text{H}]^+$  *calcd.* For  $\text{C}_{18}\text{H}_{26}\text{NO}_3^+$  304.1907, found 304.1905.  $[\alpha]_D^{20}$  24.33 ( $c = 3.53$  in  $\text{CHCl}_3$ ). The enantiomeric ratio was determined by HPLC analysis on Daicel Chiralpak IC column [*n*-hexane/*i*-PrOH = 70/30, 1 mL/min],  $\lambda = 240$  nm,  $t_{\text{major}} = 15.26$  min,  $t_{\text{minor}} = 20.48$  min, **er** = **95:5**. The diastereomeric ratio was determined by  $^1\text{H NMR}$ , **dr** >**20:1**.

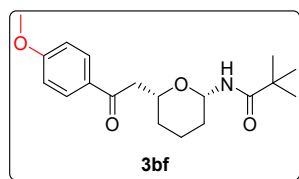

**3bf** was obtained as a colorless oil 17 mg in 51% yield after column chromatography on silica gel (petroleum ether/ethyl acetate = 2/1). <sup>1</sup>H NMR (400 MHz, CDCl<sub>3</sub>) δ 7.93 (d, *J* = 8.7 Hz, 2H), 6.92 (d, *J* = 8.7 Hz, 2H), 5.97 (d, *J* = 8.5 Hz, 1H), 5.16 (t, *J* = 9.3 Hz, 1H), 4.11 (s, 1H), 3.87 (s, 3H), 3.29 (dd, *J* = 15.9, 4.4 Hz, 1H), 3.01 (dd, *J* = 15.9, 8.2 Hz, 1H), 1.88 (d, *J* = 13.4 Hz, 1H), 1.80 (d, *J* = 12.9 Hz, 2H), 1.73 – 1.63 (m, 1H), 1.28 (dt, *J* = 18.5, 5.5 Hz, 2H), 1.19 (s, 9H) ppm. <sup>13</sup>C NMR (101 MHz, CDCl<sub>3</sub>) δ 196.3, 177.7, 163.5, 130.6, 130.3, 113.7, 78.6, 74.1, 55.5, 45.0, 38.7, 31.4, 30.7, 27.4, 22.7 ppm. HRMS: [M+H]<sup>+</sup> *calcd.* For C<sub>19</sub>H<sub>28</sub>NO<sub>4</sub><sup>+</sup> 334.2013, found 334.2014. [α]<sub>D</sub><sup>20</sup> 15.82 (*c* = 1.52 in CHCl<sub>3</sub>). The enantiomeric ratio was determined by HPLC analysis on Daicel Chiralpak IC column [*n*-hexane/*i*-PrOH = 70/30, 1 mL/min], λ = 240 nm, *t*<sub>major</sub> = 27.10 min, *t*<sub>minor</sub> = 32.84 min, **er** = **92:8**. The diastereomeric ratio was determined by <sup>1</sup>H NMR, **dr** >**20:1**.

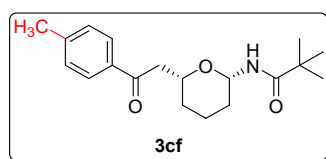

**3cf** was obtained as a white solid 16 mg in 50% yield after column chromatography on silica gel (petroleum ether/ethyl acetate = 3/1). <sup>1</sup>H NMR (400 MHz, CDCl<sub>3</sub>) δ 7.84 (d, *J* = 8.2 Hz, 2H), 7.24 (d, *J* = 8.1 Hz, 2H), 5.97 (d, *J* = 8.6 Hz, 1H), 5.20 – 5.11 (m, 1H), 4.16 – 4.07 (m, 1H), 3.31 (dd, *J* = 16.0, 4.5 Hz, 1H), 3.03 (dd, *J* = 16.0, 8.2 Hz, 1H), 2.40 (s, 3H), 1.87 (dd, *J* = 11.4, 4.8 Hz, 1H), 1.79 (d, *J* = 13.2 Hz, 2H), 1.72 – 1.60 (m, 1H), 1.35 – 1.21 (m, 2H), 1.18 (s, 9H) ppm. <sup>13</sup>C NMR (125 MHz, CDCl<sub>3</sub>) δ 197.4, 177.6, 143.9, 134.6, 129.2, 128.3, 78.6, 74.0, 45.1, 38.6, 31.4, 30.6, 27.4, 22.7, 21.6 ppm. HRMS: [M+H]<sup>+</sup> *calcd.* For C<sub>19</sub>H<sub>28</sub>NO<sub>3</sub><sup>+</sup> 318.2064, found 318.2058. [α]<sub>D</sub><sup>20</sup> 18.78 (*c* = 0.62 in CHCl<sub>3</sub>). The enantiomeric ratio was determined by HPLC analysis on Daicel Chiralpak IC column [*n*-hexane/*i*-PrOH = 65/35, 1 mL/min], λ = 240 nm, *t*<sub>major</sub> = 16.13 min, *t*<sub>minor</sub> = 19.81 min, **er** = **95:5**. The diastereomeric ratio was determined by <sup>1</sup>H NMR, **dr** >**20:1**.

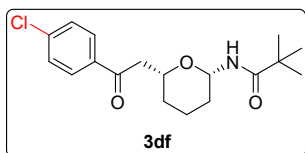

**3df** was obtained as a yellow oil 26 mg in 77% yield after column chromatography on silica gel (petroleum ether/ethyl acetate = 3/1).  $^1\text{H NMR}$  (400 MHz,  $\text{CDCl}_3$ )  $\delta$  7.88 (d,  $J = 8.6$  Hz, 2H), 7.42 (d,  $J = 8.6$  Hz, 2H), 5.96 (d,  $J = 8.6$  Hz, 1H), 5.15 (ddd,  $J = 10.9, 9.0, 2.1$  Hz, 1H), 4.09 (dddd,  $J = 9.7, 7.0, 4.8, 1.8$  Hz, 1H), 3.28 (dd,  $J = 16.0, 4.8$  Hz, 1H), 3.02 (dd,  $J = 16.0, 7.7$  Hz, 1H), 1.94 – 1.84 (m, 1H), 1.84 – 1.74 (m, 2H), 1.75 – 1.61 (m, 1H), 1.38 – 1.20 (m, 2H), 1.18 (s, 9H) ppm.  $^{13}\text{C NMR}$  (101 MHz,  $\text{CDCl}_3$ )  $\delta$  196.7, 177.7, 139.5, 135.5, 129.7, 128.8, 78.5, 73.9, 45.2, 38.7, 31.2, 30.6, 27.4, 22.7 ppm. **HRMS**:  $[\text{M}+\text{H}]^+$  *calcd.* For  $\text{C}_{18}\text{H}_{25}\text{ClNO}_3^+$  338.1517, found 338.1520.  $[\alpha]_{\text{D}}^{20}$  28.06 ( $c = 1.14$  in  $\text{CHCl}_3$ ). The enantiomeric ratio was determined by HPLC analysis on Daicel Chiralpak IC column [*n*-hexane/*i*-PrOH = 70/30, 1 mL/min],  $\lambda = 240$  nm,  $t_{\text{major}} = 11.67$  min,  $t_{\text{minor}} = 16.04$  min, **er** = **93:7**. The diastereomeric ratio was determined by  $^1\text{H NMR}$ , **dr** >**20:1**.

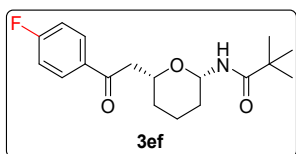

**3ef** was obtained as a white solid 20 mg in 62% yield after column chromatography on silica gel (petroleum ether/ethyl acetate = 3/1).  $^1\text{H NMR}$  (400 MHz,  $\text{CDCl}_3$ )  $\delta$  7.98 (ddd,  $J = 8.9, 5.2, 2.5$  Hz, 2H), 7.15 – 7.09 (m, 2H), 5.97 (d,  $J = 8.6$  Hz, 1H), 5.19 – 5.12 (m, 1H), 4.11 (dd,  $J = 9.5, 4.1$  Hz, 1H), 3.29 (dd,  $J = 16.0, 4.7$  Hz, 1H), 3.03 (dd,  $J = 16.0, 7.7$  Hz, 1H), 1.92 – 1.85 (m, 1H), 1.83 – 1.76 (m, 2H), 1.68 (dt,  $J = 13.1, 3.8$  Hz, 1H), 1.37 – 1.22 (m, 2H), 1.18 (s, 9H) ppm.  $^{13}\text{C NMR}$  (101 MHz,  $\text{CDCl}_3$ )  $\delta$  196.3, 177.7, 167.0, 164.5, 133.6, 131.0, 130.9, 115.7, 115.5, 78.5, 73.9, 45.2, 38.7, 31.3, 30.6, 27.4 22.7 ppm.  $^{19}\text{F NMR}$  (376 MHz,  $\text{CDCl}_3$ )  $\delta$  -105.3 ppm. **HRMS**:  $[\text{M}+\text{H}]^+$  *calcd.* For  $\text{C}_{18}\text{H}_{25}\text{FNO}_3^+$  322.1813, found 322.1819.  $[\alpha]_{\text{D}}^{20}$  19.74 ( $c = 1.51$  in  $\text{CHCl}_3$ ). The enantiomeric ratio was determined by HPLC analysis on Daicel Chiralpak IC column [*n*-hexane/*i*-PrOH = 70/30, 1 mL/min],  $\lambda = 240$  nm,  $t_{\text{major}} = 12.25$  min,  $t_{\text{minor}} = 16.09$  min, **er** = **94:6**. The diastereomeric ratio was determined by  $^1\text{H NMR}$ , **dr** >**20:1**.

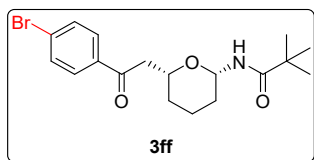

**3ff** was obtained as a white solid 24 mg in 63% yield after column chromatography on silica gel (petroleum ether/ethyl acetate = 3/1). **<sup>1</sup>H NMR** (400 MHz, CDCl<sub>3</sub>) δ 7.81 (d, *J* = 8.6 Hz, 2H), 7.58 (d, *J* = 8.6 Hz, 2H), 5.95 (d, *J* = 8.6 Hz, 1H), 5.20 – 5.09 (m, 1H), 4.16 – 4.03 (m, 1H), 3.28 (dd, *J* = 16.0, 4.8 Hz, 1H), 3.01 (dd, *J* = 16.0, 7.6 Hz, 1H), 1.95 – 1.84 (m, 1H), 1.84 – 1.76 (m, 2H), 1.74 – 1.61 (m, 1H), 1.35 – 1.22 (m, 2H), 1.18 (s, 9H) ppm. **<sup>13</sup>C NMR** (101 MHz, CDCl<sub>3</sub>) δ 196.9, 177.7, 135.9, 131.8, 129.8, 128.3, 78.5, 73.8, 45.2, 38.7, 31.2, 30.6, 27.4, 22.6 ppm. **HRMS**: [M+H]<sup>+</sup> *calcd.* For C<sub>18</sub>H<sub>25</sub>BrNO<sub>3</sub><sup>+</sup> 382.1012, found 382.1013. **[α]<sub>D</sub><sup>20</sup>** 40.27 (*c* = 0.89 in CHCl<sub>3</sub>). The enantiomeric ratio was determined by HPLC analysis on Daicel Chiralpak IC column [*n*-hexane/*i*-PrOH = 70/30, 1 mL/min], λ = 240 nm, *t*<sub>major</sub> = 11.95 min, *t*<sub>minor</sub> = 16.67 min, **er** = **95:5**. The diastereomeric ratio was determined by <sup>1</sup>H NMR, **dr** >**20:1**.

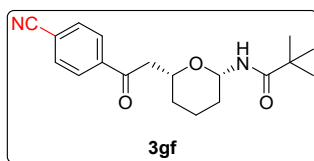

**3gf** was obtained as a colorless oil 12 mg in 37% yield after column chromatography on silica gel (petroleum ether/ethyl acetate = 2/1). **<sup>1</sup>H NMR** (500 MHz, CDCl<sub>3</sub>) δ 8.02 (d, *J* = 8.1 Hz, 2H), 7.74 (d, *J* = 8.1 Hz, 2H), 5.92 (d, *J* = 8.6 Hz, 1H), 5.12 (t, *J* = 9.8 Hz, 1H), 4.08 (dt, *J* = 11.1, 5.9 Hz, 1H), 3.28 (dd, *J* = 15.9, 5.1 Hz, 1H), 3.04 (dd, *J* = 15.9, 7.0 Hz, 1H), 1.90 (d, *J* = 13.5 Hz, 1H), 1.78 (d, *J* = 12.7 Hz, 2H), 1.67 (d, *J* = 12.9 Hz, 1H), 1.33 – 1.20 (m, 2H), 1.16 (s, 9H) ppm. **<sup>13</sup>C NMR** (101 MHz, CDCl<sub>3</sub>) δ 196.9, 177.7, 140.2, 132.4, 128.7, 118.0, 116.3, 78.5, 73.8, 45.5, 38.7, 31.1, 30.6, 27.4, 22.7 ppm. **HRMS**: [M+H]<sup>+</sup> *calcd.* For C<sub>19</sub>H<sub>25</sub>N<sub>2</sub>O<sub>3</sub><sup>+</sup> 329.1860, found 329.1860. **[α]<sub>D</sub><sup>20</sup>** 15.17 (*c* = 0.77 in CHCl<sub>3</sub>). The enantiomeric ratio was determined by HPLC analysis on Daicel Chiralpak IC column [*n*-hexane/*i*-PrOH = 65/35, 1 mL/min], λ = 240 nm, *t*<sub>major</sub> = 17.66 min, *t*<sub>minor</sub> = 24.69 min, **er** = **95:5**. The diastereomeric ratio was determined by <sup>1</sup>H NMR, **dr** >**20:1**.

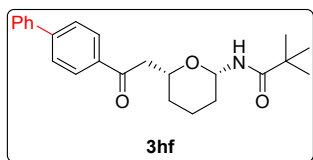

**3hf** was obtained as a colorless oil 14 mg in 37% yield after column chromatography on silica gel (petroleum ether/ethyl acetate = 3/1). **<sup>1</sup>H NMR** (400 MHz, CDCl<sub>3</sub>) δ 8.02 (d, *J* = 8.4 Hz, 2H), 7.67 (d, *J* = 8.4 Hz, 2H), 7.65 – 7.59 (m, 2H), 7.47 (t, *J* = 7.4 Hz, 2H), 7.40 (dd, *J* = 8.3, 6.3 Hz, 1H), 5.97 (d, *J* = 8.7 Hz, 1H), 5.18 (ddd, *J* = 10.9, 9.0, 2.1 Hz, 1H), 4.15 (dt, *J* = 6.1, 3.5 Hz, 1H), 3.37 (dd, *J* = 16.0, 4.6 Hz, 1H), 3.09 (dd, *J* = 16.0, 8.0 Hz, 1H), 1.94 – 1.85 (m, 1H), 1.85 – 1.76 (m, 2H), 1.71 (t, *J* = 3.8 Hz, 1H), 1.37 – 1.21 (m, 2H), 1.19 (s, 9H) ppm. **<sup>13</sup>C NMR** (125 MHz, CDCl<sub>3</sub>) δ 197.4, 177.6, 145.8, 139.9, 135.8, 128.9, 128.8, 128.2, 127.2, 127.2, 78.6, 74.0, 45.3, 38.6, 31.4, 30.6, 27.4, 22.7 ppm. **HRMS**: [M+H]<sup>+</sup> *calcd.* For C<sub>24</sub>H<sub>30</sub>NO<sub>3</sub><sup>+</sup> 380.2220, found 380.2229. [α]<sub>D</sub><sup>20</sup> 35.32 (*c* = 0.77 in CHCl<sub>3</sub>). The enantiomeric ratio was determined by HPLC analysis on Daicel Chiralpak IC column [*n*-hexane/*i*-PrOH = 65/35, 1 mL/min], λ = 210 nm, *t*<sub>major</sub> = 13.67 min, *t*<sub>minor</sub> = 18.93 min, **er = 92:8**. The diastereomeric ratio was determined by <sup>1</sup>H NMR, **dr >20:1**.

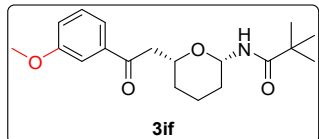

**3if** was obtained as a white solid 20 mg in 60% yield after column chromatography on silica gel (petroleum ether/ethyl acetate = 3/1). **<sup>1</sup>H NMR** (400 MHz, CDCl<sub>3</sub>) δ 7.52 (d, *J* = 7.6 Hz, 1H), 7.46 (s, 1H), 7.35 (t, *J* = 7.9 Hz, 1H), 7.09 (dd, *J* = 8.1, 2.5 Hz, 1H), 5.95 (d, *J* = 8.5 Hz, 1H), 5.21 – 5.11 (m, 1H), 4.12 (dt, *J* = 11.0, 5.6 Hz, 1H), 3.84 (s, 3H), 3.31 (dd, *J* = 16.2, 4.6 Hz, 1H), 3.05 (dd, *J* = 16.2, 8.0 Hz, 1H), 1.88 (d, *J* = 13.5 Hz, 1H), 1.80 (d, *J* = 14.0 Hz, 2H), 1.72 – 1.64 (m, 1H), 1.35 – 1.21 (m, 2H), 1.18 (s, 9H) ppm. **<sup>13</sup>C NMR** (101 MHz, CDCl<sub>3</sub>) δ 197.6, 177.7, 159.8, 138.5, 129.5, 120.9, 119.7, 112.3, 78.6, 73.9, 55.4, 45.3, 38.7, 31.4, 30.6, 27.4, 22.7 ppm. **HRMS**: [M+H]<sup>+</sup> *calcd.* For C<sub>19</sub>H<sub>28</sub>NO<sub>4</sub><sup>+</sup> 334.2013, found 334.2010. [α]<sub>D</sub><sup>20</sup> 25.19 (*c* = 0.87 in CHCl<sub>3</sub>). The enantiomeric ratio was determined by HPLC analysis on Daicel Chiralpak IC column [*n*-hexane/*i*-PrOH = 65/35, 1 mL/min], λ = 210 nm, *t*<sub>major</sub> = 14.80 min, *t*<sub>minor</sub> = 17.91 min, **er = 93:7**. The diastereomeric ratio was determined by <sup>1</sup>H NMR, **dr >20:1**.

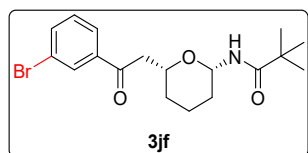

**3jf** was obtained as a colorless oil 18 mg in 47% yield after column chromatography on silica gel (petroleum ether/ethyl acetate = 3/1). **<sup>1</sup>H NMR** (400 MHz, CDCl<sub>3</sub>) δ 8.07 (t, *J* = 1.7 Hz, 1H), 7.90 – 7.83 (m, 1H), 7.67 (ddd, *J* = 7.9, 1.8, 0.9 Hz, 1H), 7.33 (t, *J* = 7.9 Hz, 1H), 5.96 (d, *J* = 8.7 Hz, 1H), 5.15 (ddd, *J* = 10.9, 9.0, 2.2 Hz, 1H), 4.10 (dddd, *J* = 9.5, 7.1, 5.0, 1.9 Hz, 1H), 3.27 (dd, *J* = 16.0, 5.0 Hz, 1H), 3.02 (dd, *J* = 16.1, 7.4 Hz, 1H), 1.95 – 1.85 (m, 1H), 1.84 – 1.74 (m, 2H), 1.75 – 1.62 (m, 1H), 1.35 – 1.21 (m, 2H), 1.18 (s, 9H) ppm. **<sup>13</sup>C NMR** (101 MHz, CDCl<sub>3</sub>) δ 196.6, 177.7, 138.9, 135.9, 131.4, 130.1, 126.8, 122.9, 78.5, 73.8, 45.2, 38.7, 31.3, 30.6, 27.4, 22.7 ppm. **HRMS**: [M+H]<sup>+</sup> *calcd.* For C<sub>18</sub>H<sub>25</sub>BrNO<sub>3</sub><sup>+</sup> 382.1012, found 382.1010. [α]<sub>D</sub><sup>20</sup> 19.96 (*c* = 0.75 in CHCl<sub>3</sub>). The enantiomeric ratio was determined by HPLC analysis on Daicel Chiralpak IC column [*n*-hexane/*i*-PrOH = 70/30, 1 mL/min], λ = 240 nm, *t*<sub>major</sub> = 11.06 min, *t*<sub>minor</sub> = 17.72 min, **er** = **94:6**. The diastereomeric ratio was determined by <sup>1</sup>H NMR, **dr** >**20:1**.

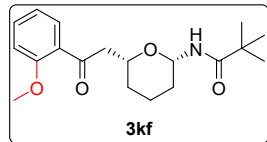

**3kf** was obtained as a colorless oil 18 mg in 54% yield after column chromatography on silica gel (petroleum ether/ethyl acetate = 3/1). **<sup>1</sup>H NMR** (400 MHz, CDCl<sub>3</sub>) δ 7.63 (dd, *J* = 7.7, 1.7 Hz, 1H), 7.48 – 7.40 (m, 1H), 7.03 – 6.89 (m, 2H), 5.97 (d, *J* = 8.5 Hz, 1H), 5.17 – 5.06 (m, 1H), 4.06 (dt, *J* = 5.6, 3.0 Hz, 1H), 3.89 (s, 3H), 3.32 (dd, *J* = 16.4, 4.9 Hz, 1H), 3.11 (dd, *J* = 16.4, 8.0 Hz, 1H), 1.89 – 1.82 (m, 1H), 1.78 (d, *J* = 14.4 Hz, 2H), 1.65 (qd, *J* = 13.1, 3.9 Hz, 1H), 1.28 (ddt, *J* = 23.6, 12.6, 5.4 Hz, 2H), 1.18 (s, 9H) ppm. **<sup>13</sup>C NMR** (125 MHz, CDCl<sub>3</sub>) δ 200.0, 177.5, 158.4, 133.4, 130.2, 120.6, 111.4, 78.6, 74.1, 55.5, 50.4, 38.6, 31.4, 30.6, 27.4, 22.7 ppm. **HRMS**: [M+H]<sup>+</sup> *calcd.* For C<sub>19</sub>H<sub>28</sub>NO<sub>4</sub><sup>+</sup> 334.2013, found 334.2015. [α]<sub>D</sub><sup>20</sup> 20.45 (*c* = 0.69 in CHCl<sub>3</sub>). The enantiomeric ratio was determined by HPLC analysis on Daicel Chiralpak IC column [*n*-hexane/*i*-PrOH = 65/35, 1 mL/min], λ = 240 nm, *t*<sub>major</sub> = 22.98 min, *t*<sub>minor</sub> = 26.57 min, **er** = **87:13**. The diastereomeric ratio was determined by <sup>1</sup>H NMR, **dr** >**20:1**.

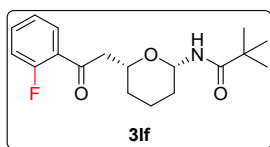

**3f** was obtained as a colorless oil 18 mg in 56% yield after column chromatography on silica gel (petroleum ether/ethyl acetate = 3/1). **<sup>1</sup>H NMR** (400 MHz, CDCl<sub>3</sub>) δ 7.80 (td, *J* = 7.6, 1.8 Hz, 1H), 7.50 (dddd, *J* = 8.3, 7.1, 5.0, 1.8 Hz, 1H), 7.24 – 7.18 (m, 1H), 7.14 – 7.08 (m, 1H), 5.93 (d, *J* = 8.4 Hz, 1H), 5.12 (td, *J* = 9.9, 8.9, 2.1 Hz, 1H), 4.16 – 4.06 (m, 1H), 3.29 (ddd, *J* = 16.9, 5.5, 2.7 Hz, 1H), 3.11 (ddd, *J* = 16.9, 7.2, 2.8 Hz, 1H), 1.88 (dd, *J* = 13.6, 2.6 Hz, 1H), 1.79 (d, *J* = 13.7 Hz, 2H), 1.68 (dt, *J* = 13.2, 3.8 Hz, 1H), 1.34 – 1.21 (m, 2H), 1.18 (s, 9H) ppm. **<sup>13</sup>C NMR** (101 MHz, CDCl<sub>3</sub>) δ 196.3, 177.6, 134.5, 134.4, 130.6, 130.6, 126.0, 124.5, 124.4, 116.7, 116.5, 78.6, 73.6, 50.0, 50.0, 38.6, 31.4, 30.7, 27.4, 22.7 ppm. **<sup>19</sup>F NMR** (376 MHz, CDCl<sub>3</sub>) δ -110.0 ppm. **HRMS**: [M+H]<sup>+</sup> *calcd.* For C<sub>18</sub>H<sub>25</sub>FNO<sub>3</sub><sup>+</sup> 322.1813, found 322.1815. **[α]<sub>D</sub><sup>20</sup>** 12.64 (*c* = 0.50 in CHCl<sub>3</sub>). The enantiomeric ratio was determined by HPLC analysis on Daicel Chiralpak IC column [*n*-hexane/*i*-PrOH = 65/35, 1 mL/min], λ = 240 nm, *t*<sub>major</sub> = 10.80 min, *t*<sub>minor</sub> = 15.10 min, **er** = **92.5:7.5**. The diastereomeric ratio was determined by <sup>1</sup>H NMR, **dr** >**20:1**.

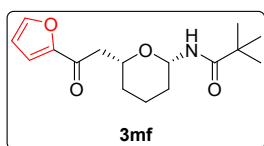

**3mf** was obtained as a colorless oil 14 mg in 48% yield after column chromatography on silica gel (petroleum ether/ethyl acetate = 2/1). **<sup>1</sup>H NMR** (400 MHz, CDCl<sub>3</sub>) δ 7.60 – 7.57 (m, 1H), 7.21 – 7.18 (m, 1H), 6.52 (dd, *J* = 3.6, 1.7 Hz, 1H), 5.96 (d, *J* = 8.5 Hz, 1H), 5.15 (ddd, *J* = 10.9, 8.9, 2.2 Hz, 1H), 4.08 (dddd, *J* = 11.1, 7.4, 5.3, 1.7 Hz, 1H), 3.16 (dd, *J* = 15.3, 5.3 Hz, 1H), 2.92 (dd, *J* = 15.3, 7.6 Hz, 1H), 1.88 (ddd, *J* = 13.6, 5.8, 3.1 Hz, 1H), 1.81 – 1.73 (m, 2H), 1.65 (ddd, *J* = 17.0, 8.6, 3.8 Hz, 1H), 1.32 – 1.21 (m, 2H), 1.18 (s, 9H) ppm. **<sup>13</sup>C NMR** (101 MHz, CDCl<sub>3</sub>) δ 186.5, 177.6, 152.8, 146.5, 117.7, 112.2, 78.6, 73.7, 45.2, 38.7, 31.3, 30.6, 27.4, 22.6 ppm. **HRMS**: [M+H]<sup>+</sup> *calcd.* For C<sub>16</sub>H<sub>24</sub>NO<sub>4</sub><sup>+</sup> 294.1700, found 294.1711. **[α]<sub>D</sub><sup>20</sup>** 20.09 (*c* = 0.29 in CHCl<sub>3</sub>). The enantiomeric ratio was determined by HPLC analysis on Daicel Chiralpak IC column [*n*-hexane/*i*-PrOH = 65/35, 1 mL/min], λ

= 240 nm,  $t_{major}$  = 21.53 min,  $t_{minor}$  = 31.77 min, **er** = **93.5:6.5**. The diastereomeric ratio was determined by  $^1\text{H NMR}$ , **dr** >**20:1**.

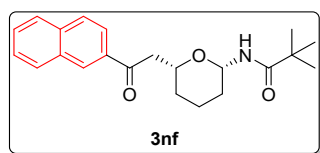

**3nf** was obtained as a colorless oil 20 mg in 57% yield after column chromatography on silica gel (petroleum ether/ethyl acetate = 3/1).  $^1\text{H NMR}$  (400 MHz,  $\text{CDCl}_3$ )  $\delta$  8.47 (s, 1H), 8.01 (dd,  $J$  = 8.6, 1.7 Hz, 1H), 7.95 (d,  $J$  = 8.0 Hz, 1H), 7.87 (dd,  $J$  = 8.3, 4.5 Hz, 2H), 7.63 – 7.51 (m, 2H), 5.98 (d,  $J$  = 8.7 Hz, 1H), 5.19 (ddd,  $J$  = 10.8, 8.9, 2.1 Hz, 1H), 4.19 (dddd,  $J$  = 11.0, 6.1, 4.7, 2.3 Hz, 1H), 3.47 (dd,  $J$  = 16.0, 4.6 Hz, 1H), 3.20 (dd,  $J$  = 16.0, 8.0 Hz, 1H), 1.91 – 1.78 (m, 3H), 1.68 (ddd,  $J$  = 16.5, 8.4, 3.6 Hz, 1H), 1.38 – 1.23 (m, 2H), 1.17 (s, 9H) ppm.  $^{13}\text{C NMR}$  (101 MHz,  $\text{CDCl}_3$ )  $\delta$  197.8, 177.7, 135.6, 134.5, 132.5, 130.1, 129.6, 128.51, 128.4, 127.8, 126.8, 123.9, 78.6, 74.0, 45.3, 38.7, 31.4, 30.7, 27.4, 22.7 ppm. **HRMS**:  $[\text{M}+\text{H}]^+$  *calcd.* For  $\text{C}_{22}\text{H}_{28}\text{NO}_3^+$  354.2064, found 354.2063.  $[\alpha]_D^{20}$  42.79 ( $c$  = 1.05 in  $\text{CHCl}_3$ ). The enantiomeric ratio was determined by HPLC analysis on Daicel Chiralpak IC column [*n*-hexane/*i*-PrOH = 70/30, 1 mL/min],  $\lambda$  = 240 nm,  $t_{major}$  = 19.19 min,  $t_{minor}$  = 26.10 min, **er** = **93.5:6.5**. The diastereomeric ratio was determined by  $^1\text{H NMR}$ , **dr** >**20:1**.

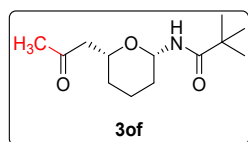

**3of** was obtained as a white solid 10 mg in 41% yield after column chromatography on silica gel (petroleum ether/ethyl acetate = 2/1).  $^1\text{H NMR}$  (400 MHz,  $\text{CDCl}_3$ )  $\delta$  5.97 (d,  $J$  = 8.0 Hz, 1H), 5.13 (ddd,  $J$  = 10.9, 9.0, 2.1 Hz, 1H), 3.99 – 3.89 (m, 1H), 2.68 (dd,  $J$  = 15.8, 6.9 Hz, 1H), 2.51 (dd,  $J$  = 15.8, 6.1 Hz, 1H), 2.17 (s, 3H), 1.92 – 1.85 (m, 1H), 1.78 (d,  $J$  = 12.3 Hz, 1H), 1.70 – 1.59 (m, 2H), 1.34 – 1.25 (m, 2H), 1.19 (s, 9H) ppm.  $^{13}\text{C NMR}$  (101 MHz,  $\text{CDCl}_3$ )  $\delta$  207.1, 177.9, 78.5, 73.6, 50.2, 38.7, 31.0, 30.5, 30.4, 27.4, 22.7 ppm. **HRMS**:  $[\text{M}+\text{H}]^+$  *calcd.* For  $\text{C}_{13}\text{H}_{24}\text{NO}_3^+$  242.1751, found 242.1756.  $[\alpha]_D^{20}$  6.46 ( $c$  = 0.42 in  $\text{CHCl}_3$ ). The enantiomeric ratio was determined by HPLC analysis on Daicel Chiralpak



AD-H column [*n*-hexane/*i*-PrOH = 95/5, 1 mL/min],  $\lambda = 202$  nm,  $t_{major} = 17.92$  min,  $t_{minor} = 21.95$  min, **er = 70:30**. The diastereomeric ratio was determined by  $^1\text{H NMR}$ , **dr >20:1**.

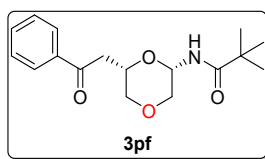

**3pf** was obtained as a colorless oil 22 mg in 72% yield after column chromatography on silica gel (petroleum ether/ethyl acetate = 3/1).  $^1\text{H NMR}$  (400 MHz,  $\text{CDCl}_3$ )  $\delta$  7.97 – 7.91 (m, 2H), 7.61 – 7.54 (m, 1H), 7.50 – 7.43 (m, 2H), 5.80 (d,  $J = 8.9$  Hz, 1H), 5.42 (ddd,  $J = 9.9, 8.9, 2.9$  Hz, 1H), 4.40 (dddd,  $J = 10.3, 7.6, 4.8, 2.6$  Hz, 1H), 3.97 (dd,  $J = 11.4, 2.6$  Hz, 1H), 3.85 (dd,  $J = 11.1, 2.9$  Hz, 1H), 3.30 (dd,  $J = 16.7, 4.8$  Hz, 1H), 3.22 (dd,  $J = 11.4, 10.2$  Hz, 1H), 3.17 (dd,  $J = 11.1, 9.8$  Hz, 1H), 2.98 (dd,  $J = 16.7, 7.9$  Hz, 1H), 1.19 (s, 9H) ppm.  $^{13}\text{C NMR}$  (101 MHz,  $\text{CDCl}_3$ )  $\delta$  196.6, 178.0, 136.7, 133.4, 128.7, 128.2, 75.7, 71.8, 69.8, 68.8, 40.8, 38.9, 27.4 ppm. **HRMS**:  $[\text{M}+\text{H}]^+$  *calcd.* For  $\text{C}_{17}\text{H}_{24}\text{NO}_4^+$  306.1700, found 306.1701.  $[\alpha]_D^{20}$  33.35 ( $c = 0.83$  in  $\text{CHCl}_3$ ). The enantiomeric ratio was determined by HPLC analysis on Daicel Chiralpak AD-H column [*n*-hexane/*i*-PrOH = 70/30, 1 mL/min],  $\lambda = 240$  nm,  $t_{major} = 5.51$  min,  $t_{minor} = 4.98$  min, **er = 97.5:2.5**. The diastereomeric ratio was determined by  $^1\text{H NMR}$ , **dr >20:1**.

## G. Other reactions of hemiaminal by desymmetrization:

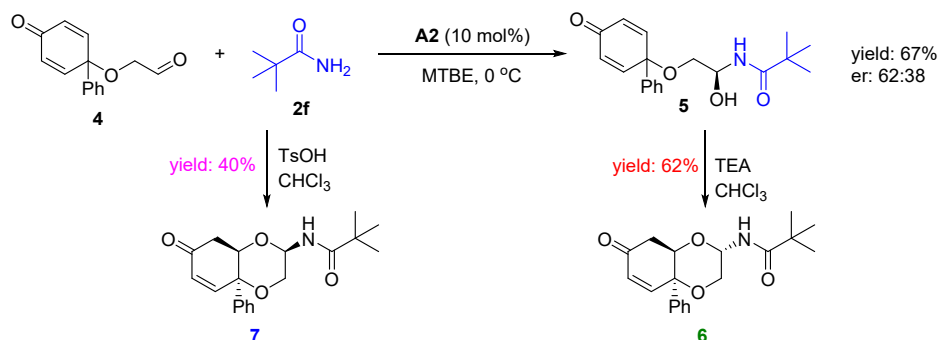

A glass vial equipped with a magnetic stirring bar was charged with **4** (0.1 mmol, 1.0 equiv), **2f** (0.12 mmol, 1.2 equiv) and **A2** (0.01 mmol, 0.1 equiv) in MTBE (0.5 mL) at 0 °C. The reaction stirred at 0 °C until the material **4** disappeared. After completion of the reaction, the reaction mixture was purified by column chromatography on silica gel (petroleum ether/ethyl acetate = 2.5:1) to afford **5** (22 mg, 67%, 62:38 er) as a white solid.

To the solution of **5** (0.05 mmol, 1.0 equiv) in CHCl<sub>3</sub> (0.2 mL), TEA (0.02 mmol, 0.4 equiv) was added at 25 °C. The reaction stirred at 25 °C for about 24 h until the material **5** disappeared. After completion of the reaction, the reaction mixture was purified by column chromatography on silica gel (petroleum ether/ethyl acetate = 3:1) to afford ( $\pm$ )-**6** (10 mg, 62%) as a white solid.

A glass vial equipped with a magnetic stirring bar was charged with **4** (0.1 mmol, 1.0 equiv), **2f** (0.12 mmol, 1.2 equiv) and TsOH (0.01 mmol, 0.1 equiv) in CHCl<sub>3</sub> (0.5 mL) at 25 °C. The reaction stirred at 25 °C for about 18 h until the material **4** disappeared. After completion of the reaction, the reaction mixture was purified by column chromatography on silica gel (petroleum ether/ethyl acetate = 3:1) to afford ( $\pm$ )-**7** (13 mg, 40%) as a white solid.

## Large scale reaction for synthesis of racemic 5 by filtration:

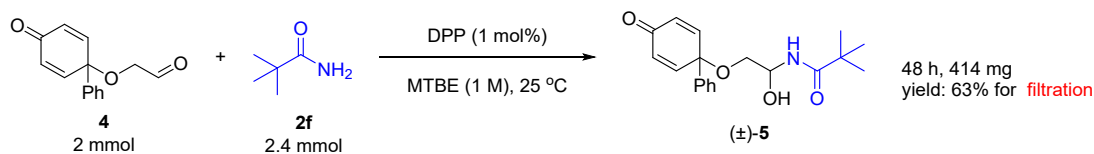

A glass vial equipped with a magnetic stirring bar was charged with **4** (2 mmol, 1.0 equiv), **2f** (2.4 mmol, 1.2 equiv) and DPP (0.02 mmol, 0.01 equiv) in MTBE (2 mL) at 25 °C and stirred until the material **4** disappeared. After completion of the reaction, the reaction mixture was purified by filtration to afford ( $\pm$ )-**5** (414 mg, 63%) as a white solid.

## H. Optimization of oxa-Michael reaction:

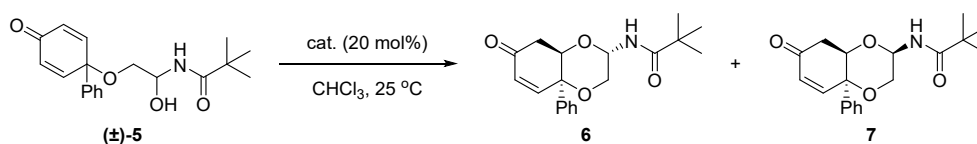

### Scheme S2. Screening of catalysts

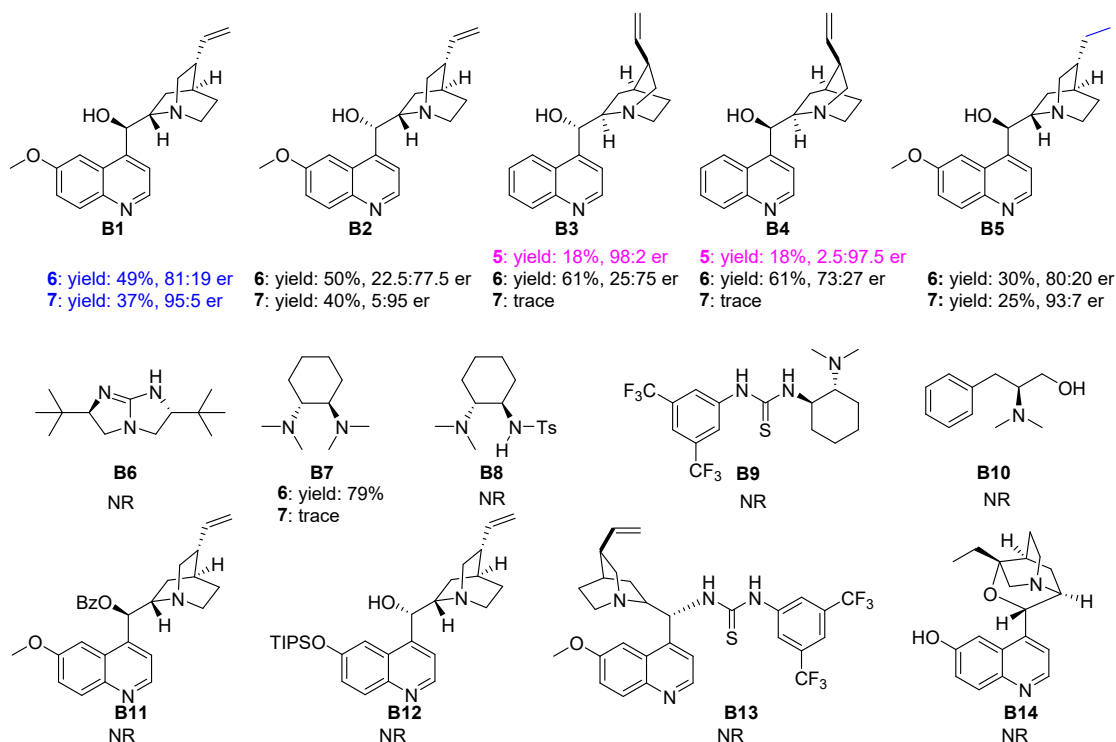

All reactions were carried out using **5** (0.1 mmol, 1.0 equiv), cat. (0.02 mmol, 0.2 equiv) in CHCl<sub>3</sub> (0.5 mL). After workup, the mixture was purified by column chromatography on

silica gel (petroleum ether/ethyl acetate = 3:1) to afford product **6** and **7** as white solids for HPLC analysis.

When **B3** and **B4** were used as the catalysts for the reaction, the amount of compound **7** is trace and **5** could be recycled with excellent stereoselectivity. And the absolute configurations of chiral **5**, **6** and **7** were confirmed by chemical correlation and reported literature.<sup>[9]</sup>

**Table S5.** Screening of other conditions

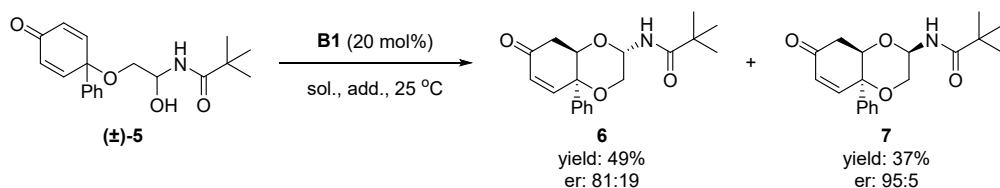

| entry <sup>[a]</sup> | Add.                | Sol.               | yield of <b>6</b> (%) <sup>[b]</sup> | er of <b>6</b> <sup>[c]</sup> | yield of <b>7</b> (%) <sup>[b]</sup> | er of <b>7</b> <sup>[c]</sup> | dr( <b>6/7</b> ) <sup>[d]</sup> |
|----------------------|---------------------|--------------------|--------------------------------------|-------------------------------|--------------------------------------|-------------------------------|---------------------------------|
| 1                    | -                   | DCM                | 54                                   | 77:23                         | 25                                   | 83:17                         | >20:1/>20:1                     |
| 2                    | -                   | DCE                | 45                                   | 83:17                         | 33                                   | 94:6                          | >20:1/>20:1                     |
| 3                    | -                   | CHCl <sub>3</sub>  | 49                                   | 81:19                         | 37                                   | 95:5                          | >20:1/>20:1                     |
| 4                    | -                   | toluene            | -                                    | -                             | NR                                   | -                             | -                               |
| 5                    | -                   | CH <sub>3</sub> CN | trace                                | -                             | trace                                | -                             | -                               |
| 6                    | -                   | THF                | trace                                | -                             | trace                                | -                             | -                               |
| 7                    | -                   | EA                 | -                                    | -                             | NR                                   | -                             | -                               |
| 8                    | -                   | MTBE               | -                                    | -                             | NR                                   | -                             | -                               |
| 9                    | -                   | Et <sub>2</sub> O  | -                                    | -                             | NR                                   | -                             | -                               |
| 10                   | -                   | 1,4-dioxane        | -                                    | -                             | NR                                   | -                             | -                               |
| 11                   | HFIP<br>(0.8 equiv) | CHCl <sub>3</sub>  | 44                                   | 70:30                         | 25                                   | 70:30                         | >20:1/>20:1                     |

12      4 Å MS  
(10 mg)      CHCl<sub>3</sub>      38      83:17      19      93:7      >20:1/>20:1

[a] Unless otherwise specified, all reactions were carried out using (**±**)-**5** (0.1 mmol, 1.0 equiv), **B1** (0.02 mmol, 0.2 equiv) in solvent (0.5 mL) with additive at 25 °C. After workup, the mixture was purified by column chromatography on silica gel (petroleum ether/ethyl acetate = 3:1) to afford product **6** and **7** as white solids. [b] Isolated yield of product. [c] Determined by HPLC analyses of isolated compounds on chiral stationary phases. [d] Determined by <sup>1</sup>H NMR.

## I. Determination of absolute configurations of **6** and **7**:

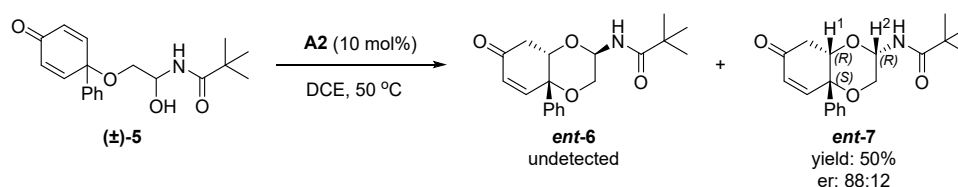

To the solution of (**±**)-**5** (0.1 mmol, 1.0 equiv) in MTBE (0.5 mL), phosphoric acid **A2** (10 mol%) was added at 25 °C. Then the reaction stirred at 50 °C until the material **5** consumed completely for about 48 h. The mixture was purified by column chromatography on silica gel (petroleum ether/ethyl acetate = 3:1) to afford product **ent-7** as a white solid (16 mg, 50%, 88:12 er). The absolute configuration of **ent-7** was confirmed by analyzed. The relative configuration of **ent-7** was confirmed by NOESY (H<sup>1</sup>-H<sup>2</sup>, Ph-H<sup>2</sup>) and according to the reported reference: similar reaction without amide catalyzed by same catalyst **A2** (*J. Am. Chem. Soc.* **2010**, *132*, 4056-4057)<sup>[9]</sup>, the absolute configurations of phenyl group and H<sup>1</sup> are (*S*) and (*R*) on the *cis*-orientation.

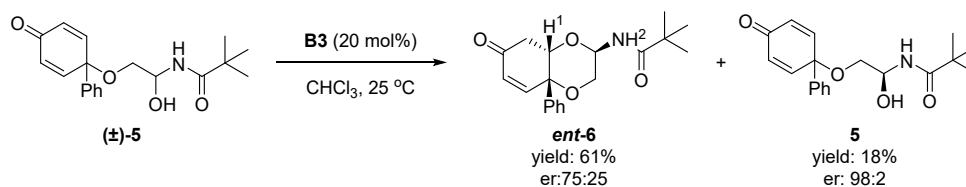

To the solution of (**±**)-**5** (0.1 mmol, 1.0 equiv) in MTBE (0.5 mL), **B2** (10 mol%) was added at 25 °C. Then the reaction stirred at 25 °C for about 3 d. The mixture was purified by column chromatography on silica gel (petroleum ether/ethyl acetate = 3:1) to afford

product **ent-6** a white solid (20 mg, 61%, 75:25 er). And **5** was recycled in 18% yield with 98:2 er. The relative configuration of **ent-6** was confirmed by NOESY ( $H^1-H^2$ , Ph- $H^2$ ). The absolute configuration of **ent-6** was confirmed according to the configuration of **5**.

According to the absolute configuration of **ent-6** and **ent-7**, the absolute configuration of **6** and **7** could be confirmed.

## J. The characterization data of 5-7:

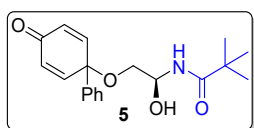

$^1\text{H NMR}$  (400 MHz,  $\text{CDCl}_3$ )  $\delta$  7.47 – 7.42 (m, 2H), 7.40 – 7.32 (m, 3H), 6.88 – 6.78 (m, 2H), 6.67 (d,  $J = 7.4$  Hz, 1H), 6.45 – 6.38 (m, 2H), 5.54 (dt,  $J = 7.4, 4.5$  Hz, 1H), 3.69 (d,  $J = 4.4$  Hz, 2H), 1.23 (s, 9H) ppm.  $^{13}\text{C NMR}$  (101 MHz,  $\text{CDCl}_3$ )  $\delta$  185.2, 179.8, 149.5, 149.3, 137.8, 130.2, 130.1, 129.0, 128.6, 125.6, 76.4, 73.3, 66.5, 38.8, 27.4 ppm. **HRMS**:  $[\text{M}+\text{H}]^+$  *calcd.* For  $\text{C}_{19}\text{H}_{24}\text{NO}_4^+$  330.1700, found 330.1694.

**Catalyzed by B3**:  $[\alpha]_D^{20}$  26.50 ( $c = 0.25$  in  $\text{CHCl}_3$ ). The enantiomeric ratio was determined by HPLC analysis on Daicel Chiralpak IA column [ $n$ -hexane/ $i$ -PrOH = 80/20, 1 mL/min],  $\lambda = 230$  nm,  $t_{\text{major}} = 5.29$  min,  $t_{\text{minor}} = 5.80$  min, **er** = **98:2**. The diastereomeric ratio was determined by NMR **dr** >**20:1**.

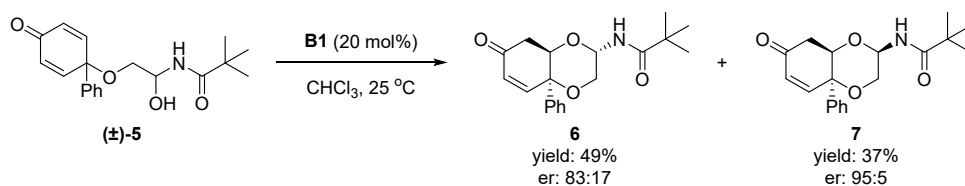

The solvent of racemic **5** (0.1 mmol, 1.0 equiv) was added **B1** (0.02 mmol, 0.2 equiv) in solvent (0.5 mL) at 25 °C. After workup, the mixture was purified by column chromatography on silica gel (petroleum ether/ethyl acetate = 3:1) to afford product **6** and **7** as white solids.

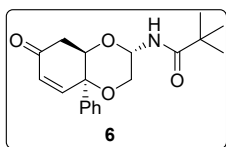

**6** was obtained as a white solid 16 mg in 49% yield after column chromatography on silica gel (petroleum ether/ethyl acetate = 2.5/1). **<sup>1</sup>H NMR** (400 MHz, CDCl<sub>3</sub>) δ 7.53 – 7.37 (m, 5H), 7.05 (d, *J* = 8.4 Hz, 1H), 6.75 (dd, *J* = 10.4, 2.8 Hz, 1H), 6.53 (dd, *J* = 10.4, 1.0 Hz, 1H), 5.54 (dd, *J* = 8.3, 2.4 Hz, 1H), 4.38 – 4.20 (m, 2H), 3.82 (d, *J* = 12.2 Hz, 1H), 2.59 – 2.38 (m, 2H), 1.31 (s, 9H) ppm. **<sup>13</sup>C NMR** (125 MHz, CDCl<sub>3</sub>) δ 195.3, 178.0, 146.5, 138.1, 134.0, 129.1, 129.0, 126.2, 77.3, 72.3, 72.1, 65.0, 40.1, 39.1, 27.6 ppm. **HRMS**: [M+H]<sup>+</sup> *calcd.* For C<sub>19</sub>H<sub>24</sub>NO<sub>4</sub><sup>+</sup> 330.1700, found 330.1702. [α]<sub>D</sub><sup>20</sup> -10.19 (*c* = 0.71 in CHCl<sub>3</sub>). The enantiomeric ratio was determined by HPLC analysis on Daicel Chiralpak IA column [*n*-hexane/*i*-PrOH = 65/35, 1 mL/min], λ = 210 nm, *t*<sub>major</sub> = 6.67 min, *t*<sub>minor</sub> = 5.40 min, **er** = **83:17**. The diastereomeric ratio was determined by NMR **dr** >**20:1**.

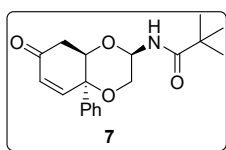

**7** was obtained as a white solid 12 mg in 37% yield after column chromatography on silica gel (petroleum ether/ethyl acetate = 3/1). **<sup>1</sup>H NMR** (400 MHz, CDCl<sub>3</sub>) δ 7.59 – 7.50 (m, 2H), 7.47 – 7.33 (m, 3H), 6.75 (dd, *J* = 10.4, 2.8 Hz, 1H), 6.50 (dd, *J* = 10.4, 1.1 Hz, 1H), 5.90 (d, *J* = 8.9 Hz, 1H), 5.61 (ddd, *J* = 10.0, 8.9, 2.8 Hz, 1H), 4.28 (q, *J* = 3.0 Hz, 1H), 3.97 (dd, *J* = 11.4, 2.8 Hz, 1H), 3.63 (dd, *J* = 11.4, 10.0 Hz, 1H), 2.61 – 2.38 (m, 2H), 1.21 (s, 9H) ppm. **<sup>13</sup>C NMR** (101 MHz, CDCl<sub>3</sub>) δ 196.3, 178.4, 148.1, 137.7, 133.3, 129.0, 128.8, 126.8, 79.5, 75.9, 75.6, 65.3, 40.9, 38.9, 27.4 ppm. **HRMS**: [M+H]<sup>+</sup> *calcd.* For C<sub>19</sub>H<sub>24</sub>NO<sub>4</sub><sup>+</sup> 330.1700, found 330.1701. [α]<sub>D</sub><sup>20</sup> -98.88 (*c* = 0.46 in CHCl<sub>3</sub>). The enantiomeric ratio was determined by HPLC analysis on Daicel Chiralpak IC column [*n*-hexane/*i*-PrOH = 65/35, 1 mL/min], λ = 205 nm, *t*<sub>major</sub> = 6.35 min, *t*<sub>minor</sub> = 11.27 min, **er** = **95:5**. The diastereomeric ratio was determined by NMR **dr** >**20:1**.

## K. Control experiments:

To gain further insight into the reaction mechanism, extensive control experiments were carried out as followed.

### (1) The reaction of **1a** and **2f** with 4 Å MS as additive to identify the importance of H<sub>2</sub>O.

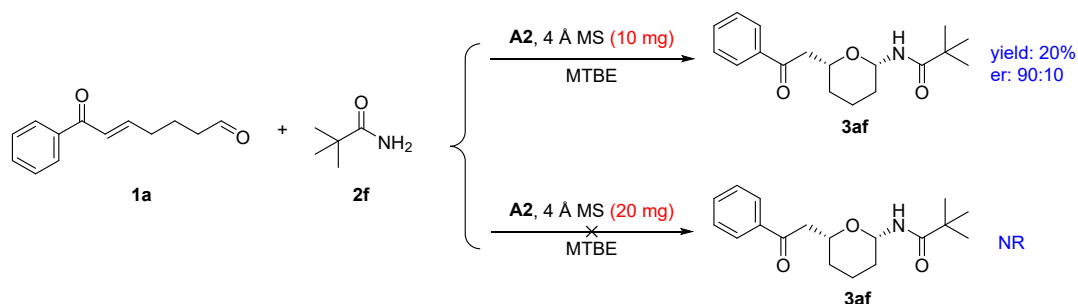

To the solution of (*E*)-7-oxo-7-phenylhept-5-enal **1a** (0.1 mmol, 1.0 equiv), amide **2f** (0.12 mmol, 1.2 equiv) in MTBE (0.5 mL) with phosphoric acid **A2** (10 mol%), 4 Å MS (10 mg) was added at 0 °C. After stirred at 0 °C for 7 d, the product **3af** was obtained in 20% yield with 90:10 er. Both yield and stereoselectivity of **3af** reduced obviously (yield: 20% vs 59%, 90:10 vs 95:5 er; contrast to reaction without 4 Å MS). When increase the amount of 4 Å MS to 20 mg, no reaction proceeded even moved to 25 °C.

### (2) The reaction of **1a** and **2f** with MeOH as additive to identify the N-acetylimine intermediate.

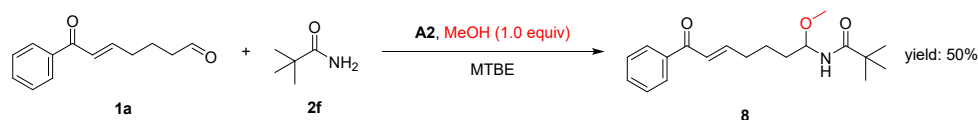

To the solution of (*E*)-7-oxo-7-phenylhept-5-enal **1a** (0.05 mmol, 1.0 equiv) and amide **2f** (0.06 mmol, 1.2 equiv) in MTBE (0.2 mL) with **A2** (10 mol%), MeOH (1.0 equiv) was added at 25 °C. After completion of the reaction (about 24 h), the reaction mixture was purified by column chromatography on silica gel (petroleum ether/ethyl acetate = 3:1). Acyclic amination **8** was isolated as a colorless oil (9 mg, 50%) without generation of cyclic **3af**,



which suggested that the formation of N-acyliminium might be involved in the reaction process.

**8:**  $^1\text{H NMR}$  (400 MHz,  $\text{CDCl}_3$ )  $\delta$  7.93 (dd,  $J = 8.3, 1.4$  Hz, 2H), 7.58 – 7.54 (m, 1H), 7.47 (t,  $J = 7.7$  Hz, 2H), 7.03 (dt,  $J = 15.4, 6.8$  Hz, 1H), 6.89 (dt,  $J = 15.3, 1.4$  Hz, 1H), 5.71 (d,  $J = 9.6$  Hz, 1H), 5.17 (dt,  $J = 10.0, 6.2$  Hz, 1H), 3.32 (s, 3H), 2.40 – 2.30 (m, 2H), 1.74 – 1.56 (m, 4H), 1.23 (s, 9H) ppm.  $^{13}\text{C NMR}$  (101 MHz,  $\text{CDCl}_3$ )  $\delta$  190.8, 178.8, 148.9, 137.9, 132.7, 128.5, 128.2, 126.4, 80.8, 55.8, 35.2, 32.3, 27.6, 27.4, 23.6 ppm. **HRMS:**  $[\text{M}+\text{H}]^+$  *calcd.* For  $\text{C}_{19}\text{H}_{28}\text{NO}_3^+$  318.2064, found 318.2063. The diastereomeric ratio was determined by NMR *dr* >20:1.

### (3) The reaction of hemiaminal ( $\pm$ )-**9** and amide **2f**: an attempt to identify the dynamic dynamic resolution and the importance of $\text{H}_2\text{O}$ .

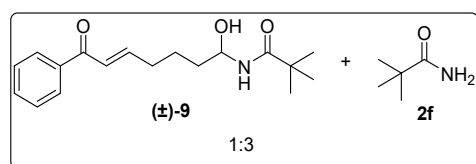

The racemic hemiaminal **9** was prepared according to the procedure in known literature.<sup>[12]</sup> The mixture of **9** and **2f** was obtained in the ratio of 1:3 purified by column chromatography on silica gel (petroleum ether/ethyl acetate = 2:1).

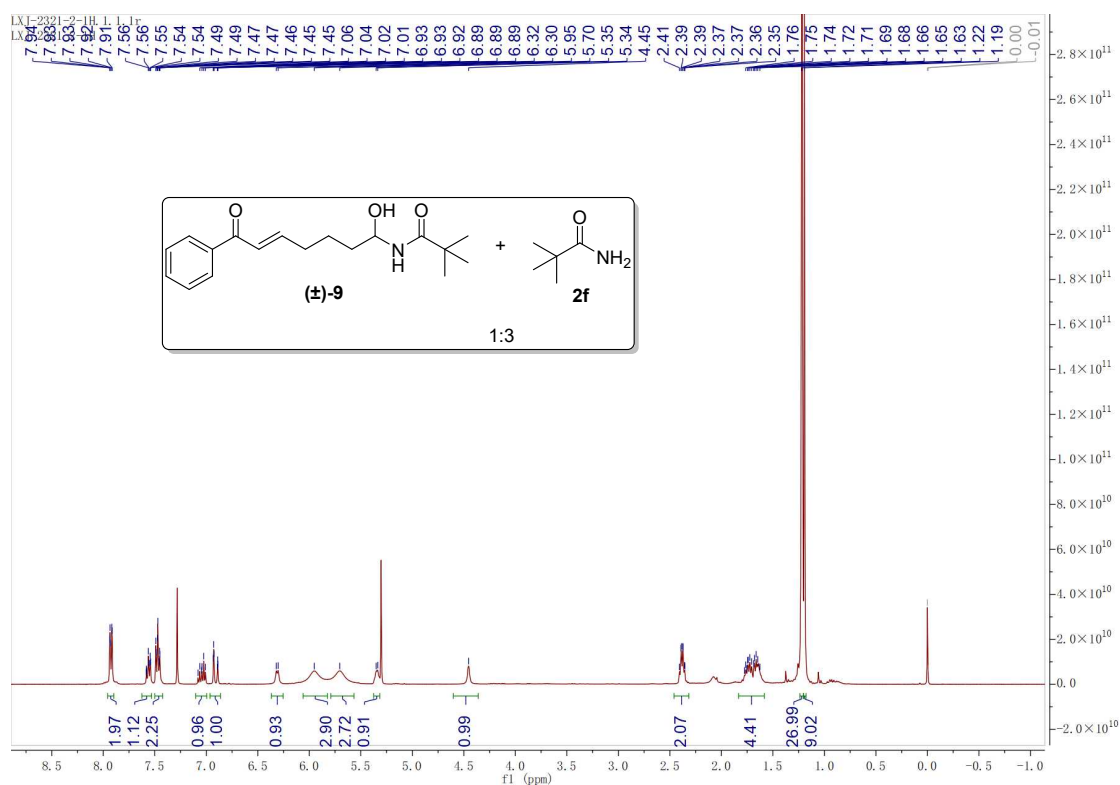

**Figure S1.** the mixture of **(±)-9** and **2f** in the ratio of 1:3

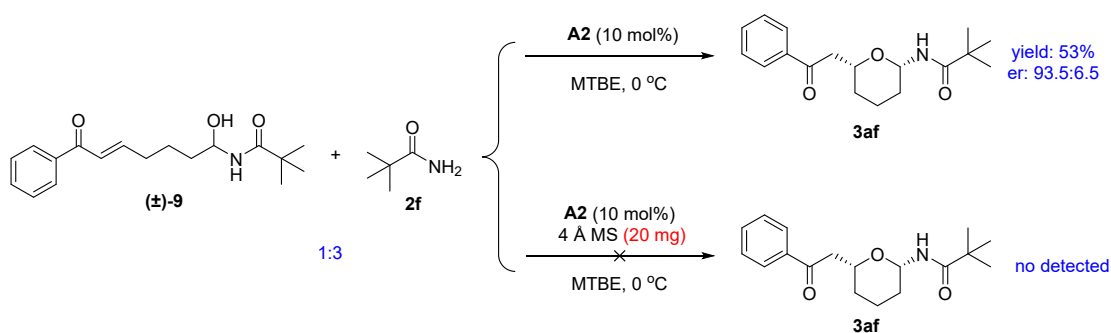

The solvent of mixture **(±)-9** (0.1 mmol, 1.0 equiv) and **2f** (1:3) in MTBE (0.5 mL) was added **A2** (10 mol%) at 0 °C. After the reaction completion, the reaction was purified by column chromatography on silica gel (petroleum ether/ethyl acetate = 3:1) to afford **3af** in 53% yield with 93.5:6.5 er. Meanwhile, with the addition of 4 Å MS (20 mg), the starting **(±)-9** disappeared, but neither product **3af** or material **(±)-9** was detected. That means hemiaminal **(±)-9** can't return to material **1a**.

**(4) The reaction of hemiaminal ( $\pm$ )-9 and amide 2f: an attempt to identify (*R*)-I undergoes rapid conversion to II, and then (*S*)-I is formed.**

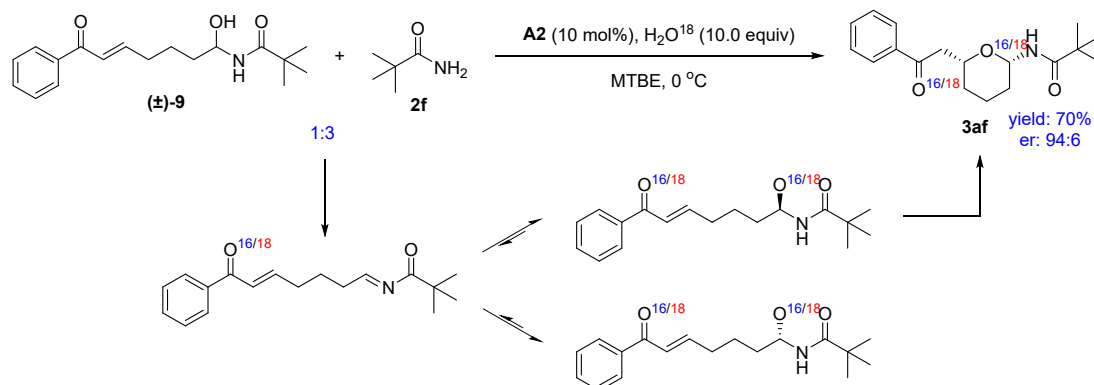

The solvent of mixture ( $\pm$ )-9 (0.1 mmol, 1.0 equiv) and 2f (1:3) in MTBE (0.5 mL) was added H<sub>2</sub>O<sup>18</sup> (10.0 equiv) and A2 (10 mol%) at 0 °C. After the reaction completion, the reaction was purified by column chromatography on silica gel (petroleum ether/ethyl acetate = 3:1) to afford 3af and O<sup>18</sup> labeled 3af in 70% yield with 94:6 er, which was detected by <sup>13</sup>CNMR and LC-MS.

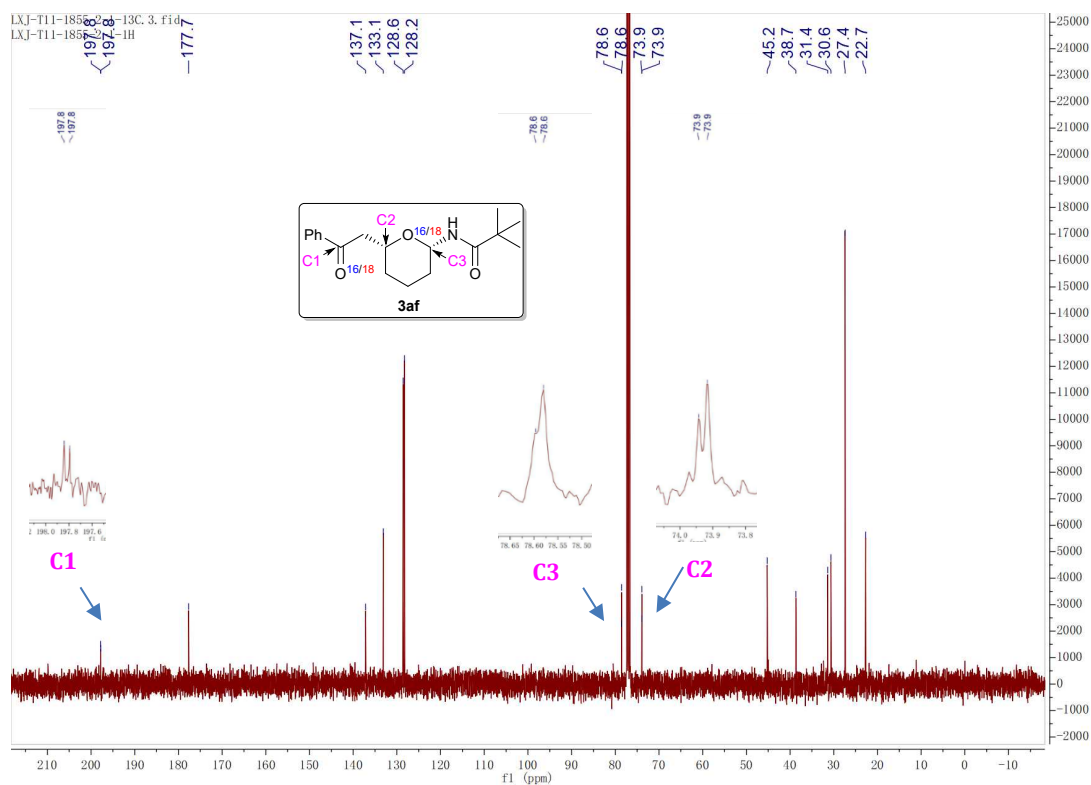

**Figure S2.** <sup>13</sup>C NMR of O<sup>16/18</sup> labeled 3af (400 MHz, CDCl<sub>3</sub>)

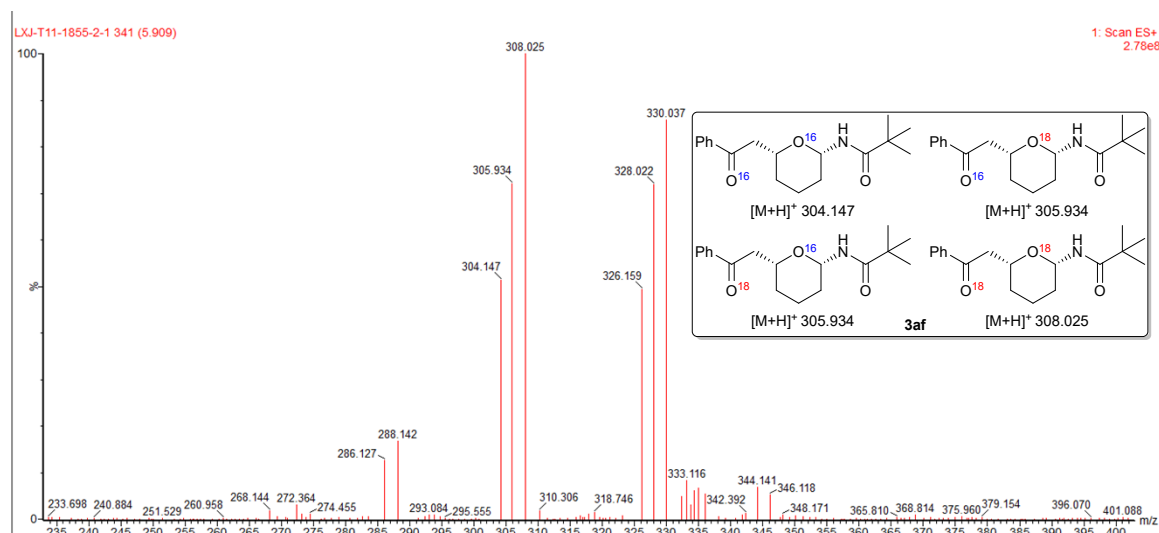

**Figure S3.** The LC-MS spectrum of O<sup>16/18</sup> labeled **3af**

**(5) <sup>1</sup>H NMR of the reaction mixture: an attempt to identify the hemiaminal **9** intermediate.**

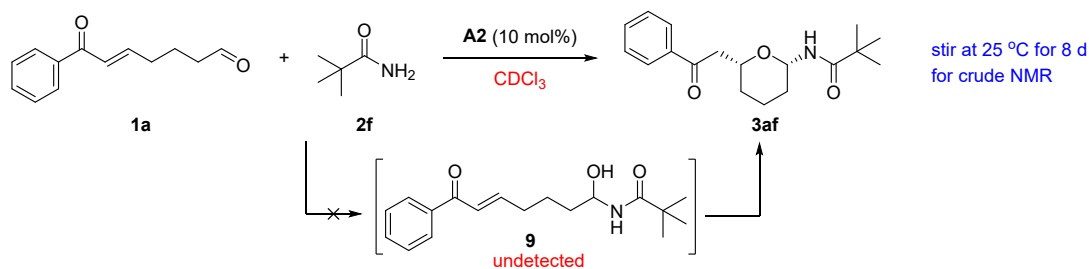

A 4 mL vial was charged with **1a** (0.1 mmol, 1.0 equiv), amide **2f** (0.12 mmol, 1.2 equiv) and **A2** (10 mol%) in CDCl<sub>3</sub> (0.5 mL) at 25 °C. Due to the amount of water in CDCl<sub>3</sub> is trace, the reaction became slow. After stirred at 25 °C for 8 d, the reaction solvent was transferred to the nuclear magnetic tube for crude NMR.

According to the crude NMR for the reaction of **1a** and **2f**, N,O-aminal **3af** generated in single configuration, while no hemiaminal **9** was detected, means that the hemiaminal **9** is unstable under acid condition.

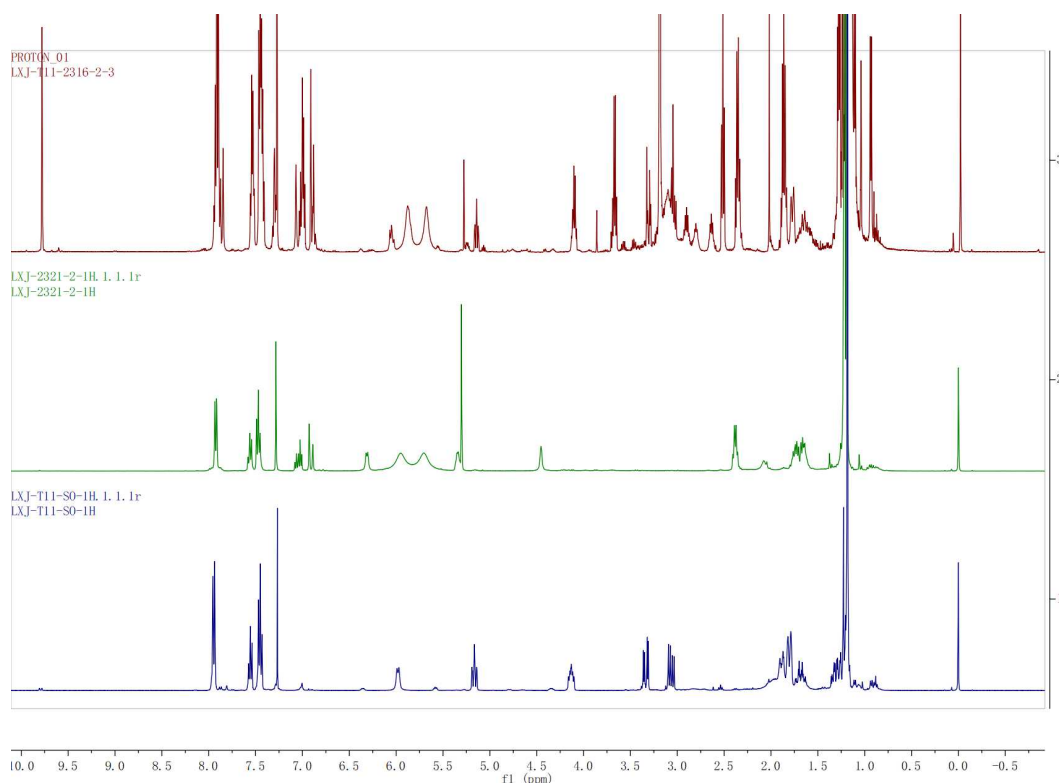

**Figure S4.** Red: crude NMR of **1a** and **2f** under standard conditions; Green: the  $^1\text{H}$  NMR of hemiaminal **9** and **2f**; Blue: the  $^1\text{H}$  NMR of product **3af**.

**(6) Quenching reaction of **1p** and **2f** under standard conditions: an attempt to identify the hemiaminal intermediate.**

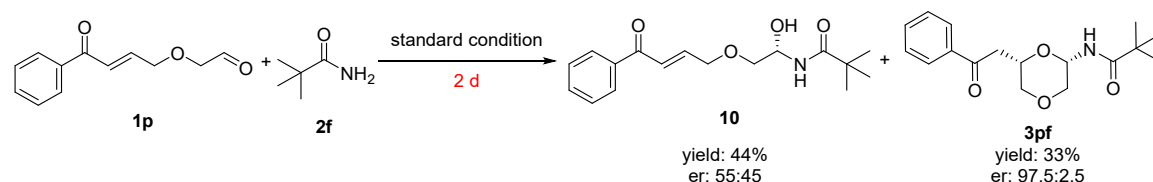

Quench the reaction of **1p** (0.1 mmol, 1.0 equiv) and **2f** (0.12 mmol, 1.2 equiv) after 2 d under standard condition (10 mol% **A2**, 0.5 mL MTBE, 0 °C) by column chromatography on silica gel (petroleum ether/ethyl acetate = 3:1 to 2:1) to afford **10** as a colorless oil (12 mg, 40%, 55.5:44.5 er) and **3pf** as a colorless oil (10 mg, 33%, 97.5:2.5 er). If the reaction stirred at 0 °C for 7 d, hemiaminal **10** could be consumed completely and transformed to **3af** (22 mg, 72 %, 97.5:2.5 er).

**10**:  $^1\text{H NMR}$  (500 MHz,  $\text{CDCl}_3$ )  $\delta$  7.96 (d,  $J = 7.6$  Hz, 2H), 7.60 – 7.55 (m, 1H), 7.48 (t,  $J = 7.7$  Hz, 2H), 7.18 (dt,  $J = 15.5, 2.0$  Hz, 1H), 7.03 (dt,  $J = 15.6, 4.2$  Hz, 1H), 6.75 (d,  $J = 6.8$  Hz, 1H), 5.60 (s, 1H), 5.50 (dt,  $J = 7.5, 3.9$  Hz, 1H), 4.43 – 4.33 (m, 2H), 3.77 – 3.65 (m, 2H), 1.22 (s, 9H) ppm.  $^{13}\text{C NMR}$  (101 MHz,  $\text{CDCl}_3$ )  $\delta$  196.6, 178.0, 136.7, 133.4, 128.7, 128.2, 75.7, 71.8, 69.8, 68.8, 40.8, 38.9, 27.4 ppm. **HRMS**:  $[\text{M}+\text{H}]^+$  *calcd.* For  $\text{C}_{17}\text{H}_{24}\text{NO}_4^+$  306.1700, found 306.1704. The enantiomeric ratio was determined by HPLC analysis on Daicel Chiralpak AD-H column [*n*-hexane/*i*-PrOH = 85/15, 1 mL/min],  $\lambda = 250$  nm,  $t_{\text{major}} = 12.95$  min,  $t_{\text{minor}} = 13.66$  min, **er = 55:45**. The diastereomeric ratio was determined by  $^1\text{H NMR}$ , **dr >20:1**.

**(7) The reaction of 10 under standard conditions: an attempt to identify the dynamic kinetic resolution**

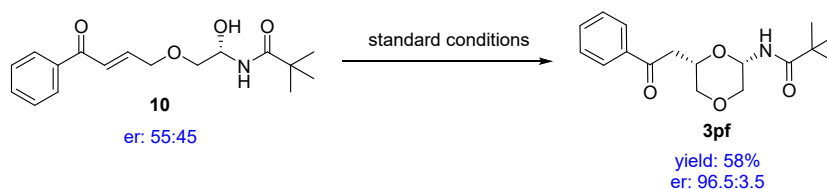

Hemiaminal **10** (12 mg, 0.04 mmol, 1.0 equiv) was redissolved in MTBE (0.16 mL), then **A2** (10 mol%) was added to the solvent at 0 °C. After the reaction finished (**10** was consumed monitored by TLC), the mixture was purified by column chromatography on silica gel (petroleum ether/ethyl acetate = 3:1) to afford **3af** as a colorless oil (7 mg, 58%, 96.5:3.5 er). These reactions mean that the hemiaminal **10** was the intermediate with poor enantioselectivity during the tandem reaction.

**(8) The reaction of ent-10 in standard condition.**

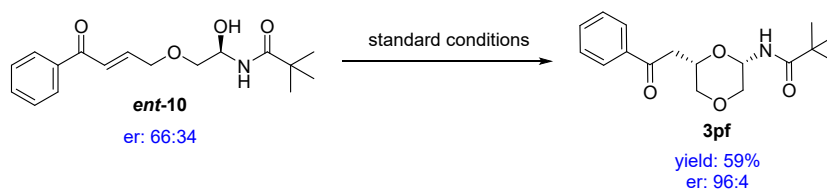

*Ent*-**10** was obtained in 50% yield with 66:34 er by recrystallization of *ent*-**10** with 58:42 from ether and *n*-hexane. Resubject hemiaminal *ent*-**10** (*R*:*S* = 66:34) to the standard

reaction condition for about 7 d. Then **3pf** was obtained in 59% with 96:4 er, which means that *ent*-**10** could turn to **10** through imide **II**, and the reaction process is a DKR.

**(9) The reaction of **11** and amide **2f** under standard conditions to identify the poor stereoselectivity of first step.**

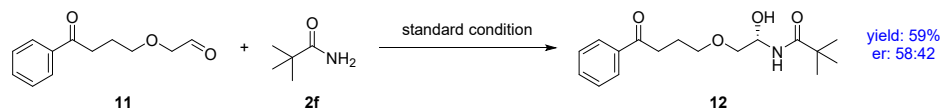

To a solvent of **11** (0.1 mmol, 1.0 equiv), amide **2f** (0.12 mmol, 1.2 equiv) was added under standard condition (10 mol% **A2**, 0.2 mL MTBE, 0 °C). After the reaction completion, the mixture was purified by column chromatography on silica gel (petroleum ether/ethyl acetate = 3:1) to afford **12** as a colorless oil (18 mg, 59%). **<sup>1</sup>H NMR** (400 MHz, CDCl<sub>3</sub>) δ 7.96 (d, *J* = 7.0 Hz, 2H), 7.61 – 7.53 (m, 1H), 7.46 (t, *J* = 7.7 Hz, 2H), 6.72 (d, *J* = 6.7 Hz, 1H), 5.41 (dt, *J* = 7.3, 4.0 Hz, 1H), 3.85 (s, 1H), 3.66 – 3.54 (m, 4H), 3.08 (t, *J* = 7.1 Hz, 2H), 2.07 (p, *J* = 6.7 Hz, 2H), 1.19 (s, 9H) ppm. **<sup>13</sup>C NMR** (101 MHz, CDCl<sub>3</sub>) δ 199.8, 180.1, 136.8, 133.1, 128.6, 128.0, 73.2, 71.8, 70.9, 38.7, 35.0, 27.3, 24.2 ppm. **HRMS**: [M+H]<sup>+</sup> *calcd.* For C<sub>17</sub>H<sub>26</sub>NO<sub>4</sub><sup>+</sup> 308.1856, found 308.1856. The enantiomeric ratio was determined by HPLC analysis on Daicel Chiralpak AD-H column [*n*-hexane/*i*-PrOH = 90/10, 1 mL/min], λ = 240 nm, *t*<sub>major</sub> = 17.41 min, *t*<sub>minor</sub> = 22.52 min, **er** = **58:42**. The diastereomeric ratio was determined by NMR **dr** >**20:1**.

## L. The possible mechanism for asymmetric reaction:

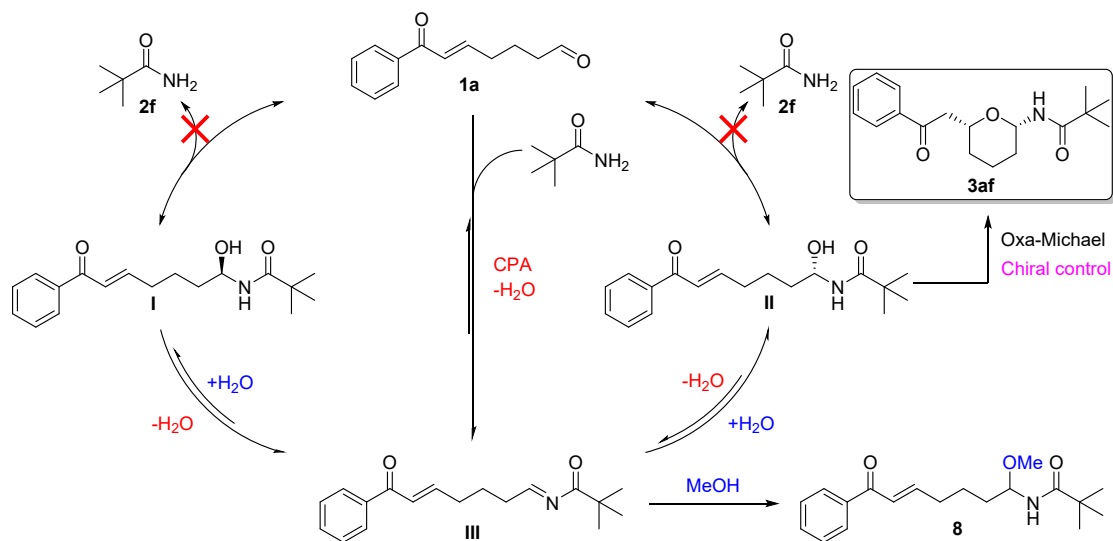

**Scheme S3.** Proposed mechanism

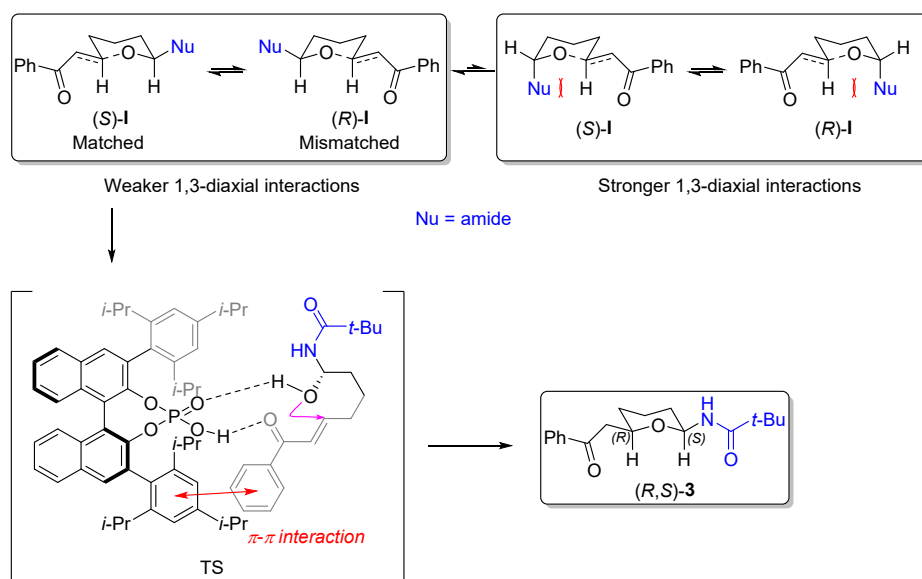

**Figure S5.** Proposed TS of the reaction

The proposed mechanism of this acid-catalyzed reaction sequence is provided in **Scheme S3**. The reaction of **1a** and **2f** led to hemiaminals **I** and **II** with poor enantioselectivities, which was quite unstable and transformed into N-acetylimine **C** after elimination of  $H_2O$ ; the formation of **C** can be evidenced by the reaction with MeOH to access aminal **8**. Under the reaction conditions, the water, which was proved to be crucial for this reaction to occur, will attack **III** to regenerate hemiaminal **I/II**. Then, hemiaminal **II** could undergo a



subsequent intramolecular oxa-Michael addition from the substrate/catalyst matched chair-like conformation, resulting in **3af** bearing two stereogenic centres with a favorable *cis* configuration. At this stage, hemiaminal **I** was converted into **II** by a dynamic kinetic resolution, where N-acetylimine **III** can be considered as the intermediate. And the transient state of the reaction was shown in **Figure S5**. These two substituents of cycloadducts are bigger groups compared with H group. When they are on the *cis*-orientation, they could be equatorial position in a six-membered oxacycle, enabling weaker 1,3-diaxial interactions.

## M. Synthetic transformations:

### 6-(2-oxo-2-phenylethyl)tetrahydro-2H-pyran-2-one **13**:

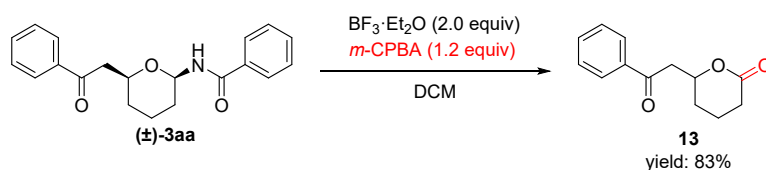

To a solvent of **(±)-3aa** (32 mg, 0.1 mmol) in  $\text{CH}_2\text{Cl}_2$  (1.0 mL) with a magnetic rotor was added *m*-CPBA (0.12 mmol, 1.2 equiv) and  $\text{BF}_3 \cdot \text{Et}_2\text{O}$  (0.2 mmol, 2.0 equiv) at 25 °C and stirred until the reaction completed (detected by TLC) for about 9 h. The mixture was purified by column chromatography on silica gel (petroleum ether/ethyl acetate = 3:1) to afford **13** (18 mg, 83%) as a colorless crystalline solid.  $^1\text{H NMR}$  (400 MHz,  $\text{CDCl}_3$ )  $\delta$  7.98 – 7.92 (m, 2H), 7.63 – 7.56 (m, 1H), 7.52 – 7.45 (m, 2H), 4.99 (dddd,  $J = 10.6, 7.2, 5.3, 3.1$  Hz, 1H), 3.56 (dd,  $J = 17.3, 5.3$  Hz, 1H), 3.19 (dd,  $J = 17.3, 7.2$  Hz, 1H), 2.66 (dtd,  $J = 17.5, 6.4, 1.0$  Hz, 1H), 2.50 (dt,  $J = 17.5, 7.9$  Hz, 1H), 2.17 (dtdd,  $J = 13.8, 4.7, 3.1, 1.0$  Hz, 1H), 1.96 (tdd,  $J = 7.9, 7.1, 5.7$  Hz, 2H), 1.65 – 1.59 (m, 1H) ppm.  $^{13}\text{C NMR}$  (101 MHz,  $\text{CDCl}_3$ )  $\delta$  196.4, 171.4, 136.6, 133.6, 128.8, 128.1, 76.5, 44.3, 29.3, 27.9, 18.4 ppm. HRMS:  $[\text{M}+\text{H}]^+$  *calcd.* For  $\text{C}_{13}\text{H}_{15}\text{O}_3^+$  219.1016, found 219.1017. The diastereomeric ratio was determined by NMR *dr* >20:1.

### phenyl 2-(6-benzamidotetrahydro-2H-pyran-2-yl)acetate **(±)-14**:

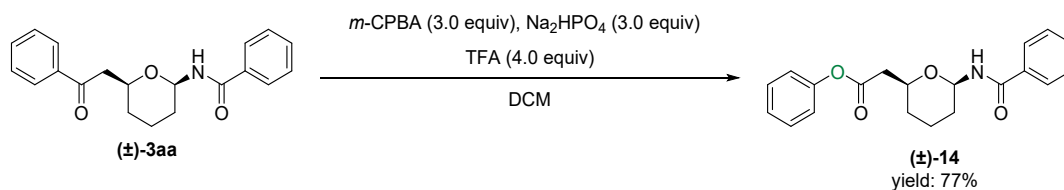

To a solvent of **(±)-3aa** (32 mg, 0.1 mmol) in  $\text{CH}_2\text{Cl}_2$  (1.0 mL) with a magnetic rotor was added *m*-CPBA (0.3 mmol, 3.0 equiv),  $\text{Na}_2\text{HPO}_4$  (0.3 mmol, 3.0 equiv) and TFA (0.4 mmol, 4.0 equiv) at 25 °C and stirred until the reaction completed (detected by TLC) for about 3 d. The mixture was purified by column chromatography on silica gel (petroleum ether/ethyl acetate = 3:1) to afford **(±)-14** (26 mg, 77%) as a colorless oil.  $^1\text{H NMR}$  (400

MHz, CDCl<sub>3</sub>)  $\delta$  7.80 (d,  $J$  = 8.4 Hz, 2H), 7.54 – 7.47 (m, 1H), 7.43 (dd,  $J$  = 8.2, 6.7 Hz, 2H), 7.38 – 7.31 (m, 2H), 7.23 – 7.16 (m, 1H), 7.09 (d,  $J$  = 6.6 Hz, 2H), 6.60 (d,  $J$  = 9.0 Hz, 1H), 5.45 (ddd,  $J$  = 10.8, 9.0, 2.1 Hz, 1H), 4.23 – 4.08 (m, 1H), 2.82 (dd,  $J$  = 14.9, 7.3 Hz, 1H), 2.72 (dd,  $J$  = 14.9, 6.1 Hz, 1H), 1.96 (ddt,  $J$  = 16.6, 11.9, 2.7 Hz, 2H), 1.80 – 1.71 (m, 2H), 1.54 – 1.41 (m, 1H), 1.41 – 1.27 (m, 1H) ppm. <sup>13</sup>C NMR (101 MHz, CDCl<sub>3</sub>)  $\delta$  169.5, 166.6, 150.7, 134.0, 131.9, 129.4, 128.6, 127.1, 125.9, 121.7, 78.8, 74.0, 41.5, 31.2, 30.3, 22.7 ppm. **HRMS:** [M+H]<sup>+</sup> *calcd.* For C<sub>20</sub>H<sub>22</sub>NO<sub>4</sub><sup>+</sup> 340.1543, found 340.1550. The diastereomeric ratio was determined by <sup>1</sup>H NMR, ***dr* >20:1**.

**phenyl 2-(6-oxotetrahydro-2H-pyran-2-yl)acetate **15**:**

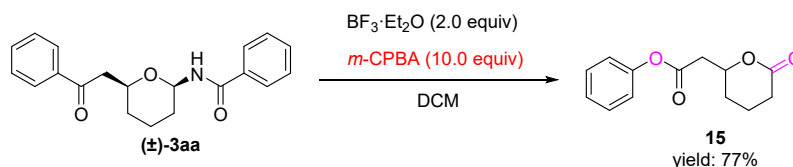

To a solvent of **(±)-3aa** (32 mg, 0.1 mmol) in CH<sub>2</sub>Cl<sub>2</sub> (1.0 mL) with a magnetic rotor was added *m*-CPBA (1.0 mmol, 10.0 equiv) and BF<sub>3</sub>·Et<sub>2</sub>O (0.2 mmol, 2.0 equiv) at 25 °C and stirred until the reaction completed (detected by TLC) for about 36 h. The mixture was purified by column chromatography on silica gel (petroleum ether/ethyl acetate = 3:1) to afford **15** (18 mg, 77%) as a colorless oil. <sup>1</sup>H NMR (400 MHz, CDCl<sub>3</sub>)  $\delta$  7.42 – 7.36 (m, 2H), 7.26 – 7.22 (m, 1H), 7.13 – 7.08 (m, 2H), 4.86 (dddd,  $J$  = 11.1, 6.8, 6.0, 3.2 Hz, 1H), 3.03 (dd,  $J$  = 16.3, 6.9 Hz, 1H), 2.86 (dd,  $J$  = 16.3, 6.0 Hz, 1H), 2.65 (dddd,  $J$  = 17.8, 6.7, 5.4, 1.1 Hz, 1H), 2.51 (ddd,  $J$  = 17.7, 8.7, 7.2 Hz, 1H), 2.15 – 2.07 (m, 1H), 2.05 – 1.88 (m, 2H), 1.78 – 1.63 (m, 1H) ppm. <sup>13</sup>C NMR (101 MHz, CDCl<sub>3</sub>)  $\delta$  170.8, 168.4, 150.4, 129.5, 126.1, 121.5, 76.2, 40.6, 29.3, 27.5, 18.4 ppm. **HRMS:** [M+H]<sup>+</sup> *calcd.* For C<sub>13</sub>H<sub>15</sub>O<sub>4</sub><sup>+</sup> 235.0965, found 235.0964. The diastereomeric ratio was determined by NMR ***dr* >20:1**.

### 3,11-diphenyl-2,10,17,18-tetraoxatricyclo[11.3.1.15,9]octadecane ( $\pm$ )-16:

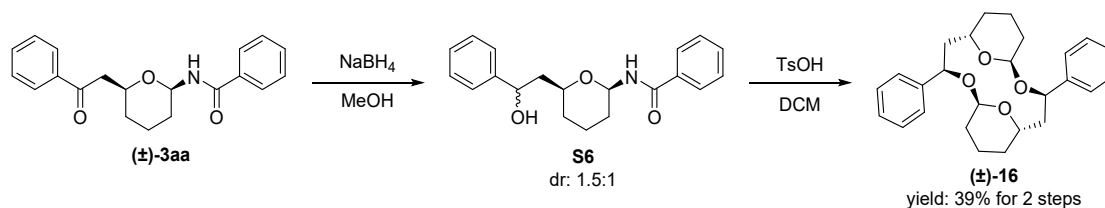

To a solvent of ( $\pm$ )-3aa (48 mg, 0.15 mmol) in MeOH (1.0 mL) with a magnetic rotor was added NaBH<sub>4</sub> (0.23 mmol, 1.5 equiv) at 0 °C and stirred for 0.5 h. After the reaction completed (detected by TLC for about 2 h), the reaction mixture was extracted with ethyl acetate (3 x 3mL) and water (3 x 3mL). Combined the organic layer, dried with Na<sub>2</sub>SO<sub>4</sub>, filtered and the solvent was removed under vacuum. The mixture was purified by column chromatography on silica gel (petroleum ether/ethyl acetate = 2:1) to afford **S6** (46 mg, 94%). To a solvent of **S6** in dry CH<sub>2</sub>Cl<sub>2</sub> (0.5 mL) was added TsOH (4.0 equiv) at 25 °C. After the reaction completed (detected by TLC), the mixture was purified by column chromatography on silica gel (petroleum ether/ethyl acetate = 25:1) to afford ( $\pm$ )-**16** (12 mg, 39% for 2 steps) as a white solid. **<sup>1</sup>H NMR** (400 MHz, CDCl<sub>3</sub>)  $\delta$  7.40 – 7.31 (m, 8H), 7.28 – 7.22 (m, 2H), 5.18 (dd,  $J$  = 11.5, 1.8 Hz, 2H), 4.77 (d,  $J$  = 3.7 Hz, 2H), 4.50 (tt,  $J$  = 11.4, 1.9 Hz, 2H), 2.04 – 1.88 (m, 2H), 1.82 (ddd,  $J$  = 14.5, 11.5, 1.5 Hz, 2H), 1.75 – 1.55 (m, 10H), 1.38 – 1.24 (m, 2H). ppm. **<sup>13</sup>C NMR** (101 MHz, CDCl<sub>3</sub>)  $\delta$  143.8, 128.3, 127.1, 126.5, 95.5, 74.1, 66.3, 45.3, 31.3, 30.0, 19.2 ppm. **HRMS**: [M+Na]<sup>+</sup> *calcd.* For C<sub>26</sub>H<sub>32</sub>NaO<sub>4</sub><sup>+</sup> 431.2193, found 431.2180. The diastereomeric ratio was determined by NMR *dr* >20:1.

### (*R*)-4-benzyl-3-((2*R*,6*S*)-6-((*E*)-2-(hydroxyimino)-2-phenylethyl)tetrahydro-2*H*-pyran-2-yl)oxazolidin-2-one **17**:

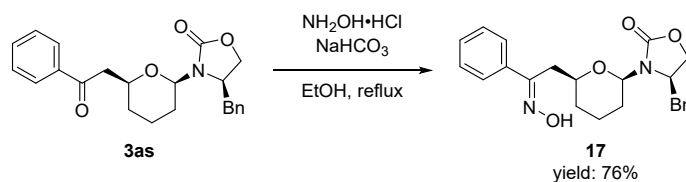

To a solvent of **3as** (20 mg, 0.05 mmol) in EtOH (0.5 mL) with a magnetic rotor was added NaHCO<sub>3</sub> (0.075 mmol, 1.5 equiv) and NH<sub>2</sub>OH·HCl (0.075 mmol, 1.5 equiv) at room

temperature. Then the reaction stirred at 80 °C for 12 h. The mixture was purified by column chromatography on silica gel (petroleum ether/ethyl acetate = 2:1) to afford **17** (15 mg, 76%) as a white solid. <sup>1</sup>H NMR (400 MHz, CDCl<sub>3</sub>) δ 8.14 (s, 1H), 7.66 – 7.60 (m, 2H), 7.35 – 7.27 (m, 5H), 7.26 – 7.21 (m, 1H), 7.13 – 7.08 (m, 2H), 4.98 (dd, *J* = 10.4, 2.9 Hz, 1H), 4.08 – 3.97 (m, 2H), 3.97 – 3.87 (m, 2H), 3.20 (dd, *J* = 14.1, 3.5 Hz, 1H), 3.14 (dd, *J* = 13.3, 5.8 Hz, 1H), 3.02 (dd, *J* = 13.3, 7.1 Hz, 1H), 2.44 (dd, *J* = 14.1, 9.7 Hz, 1H), 2.01 – 1.91 (m, 1H), 1.81 – 1.66 (m, 3H), 1.59 (dt, *J* = 13.0, 4.1 Hz, 1H), 1.36 – 1.26 (m, 1H) ppm. <sup>13</sup>C NMR (101 MHz, CDCl<sub>3</sub>) δ 157.1, 136.4, 136.3, 129.2, 129.1, 128.8, 128.4, 127.0, 126.7, 82.7, 75.4, 66.7, 54.4, 39.8, 32.8, 30.6, 28.4, 22.9 ppm. HRMS: [M+H]<sup>+</sup> *calcd.* For C<sub>23</sub>H<sub>27</sub>N<sub>2</sub>O<sub>4</sub><sup>+</sup> 395.1965, found 395.1976. [α]<sub>D</sub><sup>20</sup> -12.75 (*c* = 0.54 in CHCl<sub>3</sub>). The diastereomeric ratio was determined by NMR *dr* >20:1.

**(R)-4-benzyl-3-((2R,6S)-6-((S)-2-hydroxy-2-phenylethyl)tetrahydro-2H-pyran-2-yl)oxazolidin-2-one 18 and (R)-4-benzyl-3-((2R,6S)-6-((R)-2-hydroxy-2-phenylethyl)tetrahydro-2H-pyran-2-yl)oxazolidin-2-one 19:**

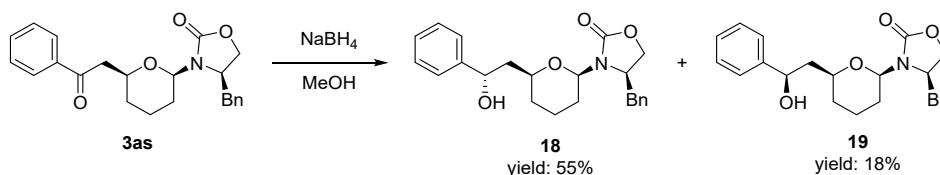

To a solvent of **3as** (76 mg, 0.2 mmol) in MeOH (1.0 mL) with a magnetic rotor was added NaBH<sub>4</sub> (0.3 mmol, 1.5 equiv) at 0 °C and stirred for 1 h. After the reaction completed (detected by TLC), the reaction mixture was extracted with ethyl acetate (3 x 3mL) and water (3 x 3mL). Combined the organic layer, dried with Na<sub>2</sub>SO<sub>4</sub>, filtered and the solvent was removed under vacuum. The mixture was purified by column chromatography on silica gel (petroleum ether/ethyl acetate = 2:1) to afford **18** (42 mg, 55%) as a colorless oil and **19** (14 mg, 18%) as a colorless oil for NMR.

**18:** <sup>1</sup>H NMR (400 MHz, CDCl<sub>3</sub>) δ 7.39 (d, *J* = 7.2 Hz, 2H), 7.34 (t, *J* = 7.4 Hz, 4H), 7.27 (t, *J* = 6.6 Hz, 2H), 7.21 (d, *J* = 7.6 Hz, 2H), 5.13 (dd, *J* = 10.5, 2.8 Hz, 1H), 4.99 (dd, *J* = 8.8, 4.2 Hz, 1H), 4.19 – 4.02 (m, 3H), 3.79 – 3.68 (m, 1H), 3.47 (dd, *J* = 14.0, 3.5 Hz, 1H), 3.40 (s, 1H),

2.82 – 2.66 (m, 1H), 2.08 – 1.94 (m, 2H), 1.80 (tq,  $J = 9.3, 2.7$  Hz, 3H), 1.66 (dt,  $J = 12.9, 4.0$  Hz, 1H), 1.62 – 1.54 (m, 1H), 1.34 – 1.23 (m, 1H) ppm.  $^{13}\text{C NMR}$  (101 MHz,  $\text{CDCl}_3$ )  $\delta$  157.2, 144.3, 136.1, 129.2, 129.0, 128.4, 127.4, 127.2, 125.9, 82.5, 78.1, 73.4, 66.8, 54.6, 45.3, 40.4, 31.0, 28.3, 22.8 ppm. **HRMS:**  $[\text{M}+\text{H}]^+$  *calcd.* For  $\text{C}_{23}\text{H}_{28}\text{NO}_4^+$  382.2013, found 382.2017.  $[\alpha]_{\text{D}}^{20}$  -26.84 ( $c = 1.83$  in  $\text{CHCl}_3$ ). The diastereomeric ratio was determined by NMR ***dr* >20:1**.

**19:**  $^1\text{H NMR}$  (400 MHz,  $\text{CDCl}_3$ )  $\delta$  7.40 – 7.31 (m, 6H), 7.29 – 7.26 (m, 2H), 7.24 – 7.19 (m, 2H), 5.08 (dd,  $J = 9.9, 3.4$  Hz, 1H), 5.02 (dd,  $J = 7.6, 3.3$  Hz, 1H), 4.12 (qq,  $J = 7.7, 3.6$  Hz, 3H), 3.76 (ddt,  $J = 11.5, 9.0, 2.6$  Hz, 1H), 3.42 (dd,  $J = 14.3, 3.3$  Hz, 1H), 2.87 – 2.60 (m, 1H), 1.99 (dt,  $J = 14.6, 4.7$  Hz, 2H), 1.90 (ddd,  $J = 14.4, 7.6, 2.9$  Hz, 1H), 1.85 – 1.75 (m, 2H), 1.67 (ddd,  $J = 21.0, 10.4, 4.2$  Hz, 2H), 1.58 – 1.51 (m, 1H), 1.35 (ddd,  $J = 13.3, 11.4, 4.2$  Hz, 1H) ppm.  $^{13}\text{C NMR}$  (101 MHz,  $\text{CDCl}_3$ )  $\delta$  157.3, 144.6, 136.1, 129.2, 128.9, 128.4, 127.1, 127.1, 125.7, 82.5, 75.4, 71.2, 66.7, 54.6, 44.4, 40.2, 30.7, 28.4, 22.9 ppm. **HRMS:**  $[\text{M}+\text{H}]^+$  *calcd.* For  $\text{C}_{23}\text{H}_{28}\text{NO}_4^+$  382.2013, found 382.2015.  $[\alpha]_{\text{D}}^{20}$  16.06 ( $c = 0.58$  in  $\text{CHCl}_3$ ). The diastereomeric ratio was determined by NMR ***dr* >20:1**.

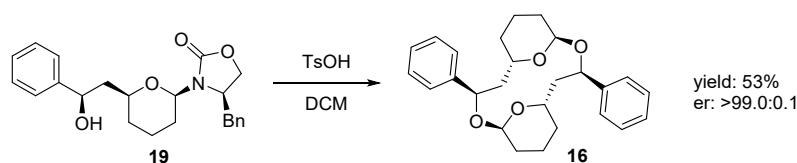

To a solvent of **19** (14 mg, 1.0 equiv) in dry  $\text{CH}_2\text{Cl}_2$  (0.5 mL) was added TsOH (4.0 equiv) at 25 °C. After the reaction completed (detected by TLC for 4 h), the mixture was purified by column chromatography on silica gel (petroleum ether/ethyl acetate = 25:1) to afford **16** (4 mg, 53%) as a white solid.  $[\alpha]_{\text{D}}^{20}$  135.18 ( $c = 0.42$  in  $\text{CHCl}_3$ ). The enantiomeric ratio was determined by HPLC analysis on Daicel Chiralpak IC column [ $n$ -hexane/ $i$ -PrOH = 90/10, 1 mL/min],  $\lambda = 210$  nm,  $t_{\text{major}} = 3.60$  min,  $t_{\text{minor}} = 4.22$  min, **er: >99.9:0.1**. The diastereomeric ratio was determined by  $^1\text{H NMR}$ , ***dr* >20:1**.

**phenyl 2-((2*R*,6*S*)-6-pivalamidotetrahydro-2*H*-pyran-2-yl)acetate **20**:**

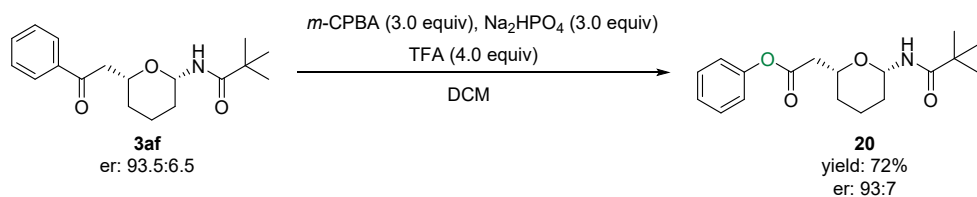

To a solvent of **3af** (30 mg, 0.1 mmol) in CH<sub>2</sub>Cl<sub>2</sub> (1.0 mL) with a magnetic rotor was added *m*-CPBA (0.3mmol, 3.0 equiv), Na<sub>2</sub>HPO<sub>4</sub> (0.3 mmol, 3.0 equiv) and TFA (0.4 mmol, 4.0 equiv) at 25 °C and stirred until the reaction completed (detected by TLC) for about 3 d. The mixture was purified by column chromatography on silica gel (petroleum ether/ethyl acetate = 3:1) to afford **20** (23 mg, 72%) as a colorless oil. <sup>1</sup>H NMR (400 MHz, CDCl<sub>3</sub>) δ 7.36 (t, *J* = 7.9 Hz, 2H), 7.24 – 7.18 (m, 1H), 7.07 (d, *J* = 7.5 Hz, 2H), 6.04 (d, *J* = 8.8 Hz, 1H), 5.23 (ddd, *J* = 11.1, 8.9, 2.3 Hz, 1H), 4.10 (dddd, *J* = 11.3, 7.8, 6.0, 2.0 Hz, 1H), 2.79 (dd, *J* = 14.7, 7.5 Hz, 1H), 2.70 (dd, *J* = 14.7, 6.1 Hz, 1H), 1.94 (ddd, *J* = 11.0, 4.6, 2.1 Hz, 1H), 1.85 – 1.76 (m, 2H), 1.69 (td, *J* = 9.2, 4.6 Hz, 1H), 1.39 – 1.26 (m, 2H), 1.20 (s, 9H) ppm. <sup>13</sup>C NMR (101 MHz, CDCl<sub>3</sub>) δ 177.8, 169.6, 150.7, 129.4, 125.8, 121.7, 78.5, 74.0, 41.6, 38.7, 31.0, 30.3, 27.4, 22.7 ppm. **HRMS**: [M+H]<sup>+</sup> *calcd.* For C<sub>18</sub>H<sub>26</sub>NO<sub>4</sub><sup>+</sup> 320.1856, found 320.1866. **[α]<sub>D</sub><sup>20</sup>** 10.55 (*c* = 1.96 in CHCl<sub>3</sub>). The enantiomeric ratio was determined by HPLC analysis on Daicel Chiralpak IC column [*n*-hexane/*i*-PrOH = 70/30, 1 mL/min], λ = 205 nm, *t*<sub>major</sub> = 11.67 min, *t*<sub>minor</sub> = 11.08 min, **er** = **93:7**. The diastereomeric ratio was determined by <sup>1</sup>H NMR, **dr** >**20:1**.

## N. Large scale reaction:

### N1: Large scale for the synthesis of racemic 3aa:

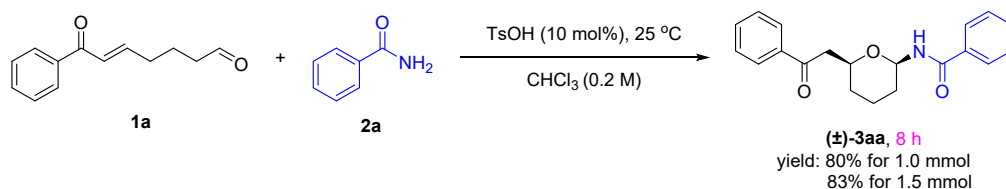

A glass vial equipped with a magnetic stirring bar was charged with (*E*)-7-oxo-7-phenylhept-5-enal **1a** (1.0 mmol or 1.5 mmol, 1.0 equiv), TsOH (0.1 equiv) and amide **2a** (1.2 equiv) in CHCl<sub>3</sub> (0.2 M) and the resultant solution was stirred at 25 °C until the material **1a** disappeared. After completion of the reaction, the reaction mixture was purified by column chromatography on silica gel (petroleum ether/ethyl acetate = 3:1) to afford (**±**)-**3aa** as a white solid (258 mg, 80% for 1.0 mmol; 402 mg, 83% for 1.5 mmol).

### N2: Large scale for the synthesis of 3as:

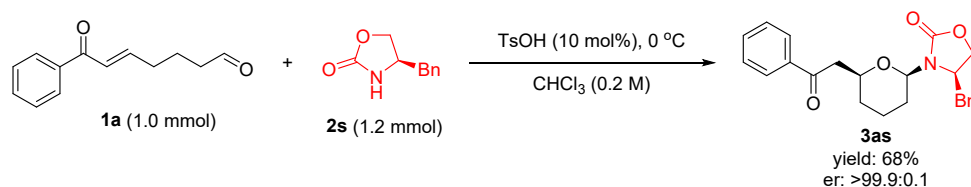

A glass vial equipped with a magnetic stirring bar was charged with (*E*)-7-oxo-7-phenylhept-5-enal **1a** (1.0 mmol, 1.0 equiv), TsOH (0.1 equiv) and amide **2s** (1.2 equiv) in CHCl<sub>3</sub> (5 mL) and the resultant solution was stirred at 0 °C until the material **1a** disappeared. After completion of the reaction, the reaction mixture was purified by column chromatography on silica gel (petroleum ether/ethyl acetate = 2:1) to afford **3as** as a colorless oil (258 mg, 68%, >99.9:0.1 er).



### N3: Large scale for the synthesis of 3af:

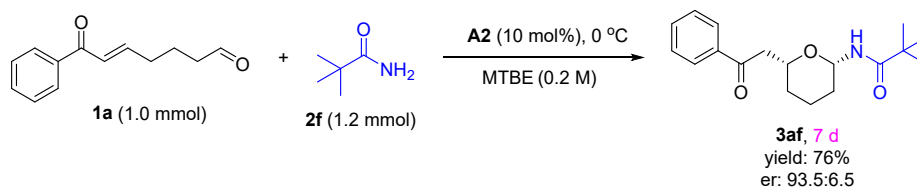

A glass vial equipped with a magnetic stirring bar was charged with (*E*)-7-oxo-7-phenylhept-5-enal **1a** (1.0 mmol, 1.0 equiv), **A2** (10 mol%) and amide **2f** (1.2 equiv) in  $\text{CHCl}_3$  (5 mL) and the resultant solution was stirred at 0 °C until the material **1a** disappeared. After completion of the reaction, the reaction mixture was purified by column chromatography on silica gel (petroleum ether/ethyl acetate = 3:1) to afford **3af** as a colorless oil (230 mg, 76%, 93.5:6.5 er).

## O. Failed substrates:

### O1. Diamides compound:

Diamides compound was obtained when aldehyde **1q-1u** was used as material to react with amide **2f** catalyzed by TsOH (10 mol%) or **A2**(10 mol%).

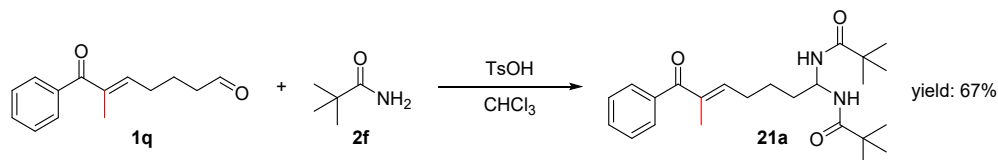

A glass vial equipped with a magnetic stirring bar was charged with **1q** (0.1 mmol, 1.0 equiv), TsOH (1.7 mg, 0.1 equiv) and amide **2f** (0.12 mmol, 1.2 equiv) in CHCl<sub>3</sub> (0.5 mL) and the resultant solution was stirred at 25 °C until the material **1q** disappeared. After completion of the reaction, the reaction mixture was purified by column chromatography on silica gel (petroleum ether/ethyl acetate = 3:1) to afford **21a** (16 mg, 67%) as a white solid. <sup>1</sup>H NMR (400 MHz, CDCl<sub>3</sub>) δ 7.62 (dt, *J* = 6.9, 1.5 Hz, 2H), 7.55 – 7.46 (m, 1H), 7.45 – 7.37 (m, 2H), 6.97 (d, *J* = 7.7 Hz, 2H), 6.23 (tq, *J* = 7.3, 1.3 Hz, 1H), 5.05 (p, *J* = 7.6 Hz, 1H), 2.29 (q, *J* = 7.4 Hz, 2H), 1.99 (dd, *J* = 8.8, 6.9 Hz, 5H), 1.42 (tt, *J* = 10.3, 6.5 Hz, 2H), 1.15 (s, 18H) ppm. <sup>13</sup>C NMR (101 MHz, CDCl<sub>3</sub>) δ 198.9, 179.2, 145.4, 138.6, 137.0, 131.4, 129.3, 128.1, 58.5, 38.8, 33.1, 28.5, 27.3, 25.3, 12.6 ppm. HRMS: [M+H]<sup>+</sup> calcd. For C<sub>24</sub>H<sub>37</sub>N<sub>2</sub>O<sub>3</sub><sup>+</sup> 401.2799, found 401.2791. The diastereomeric ratio was determined by NMR *dr* >20:1.

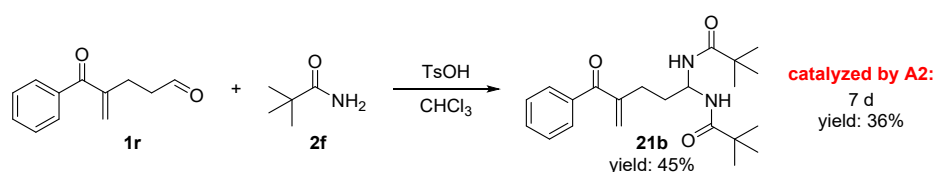

A glass vial equipped with a magnetic stirring bar was charged with **1r** (0.1 mmol, 1.0 equiv), TsOH (1.7 mg, 0.1 equiv) and amide **2f** (0.12 mmol, 1.2 equiv) in CHCl<sub>3</sub> (0.5 mL) and the resultant solution was stirred at 25 °C until the material **1r** disappeared. After completion of the reaction, the reaction mixture was purified by column chromatography on silica gel (petroleum ether/ethyl acetate = 2:1) to afford **21b** (10 mg, 45%) as a white solid. The product **32b** also could be obtained (8 mg, 36%) catalyzed by **A2** (10 mol%)

for about 7 d. **<sup>1</sup>H NMR** (500 MHz, CDCl<sub>3</sub>) δ 7.76 – 7.72 (m, 2H), 7.57 – 7.52 (m, 1H), 7.45 (t, *J* = 7.8 Hz, 2H), 7.05 (d, *J* = 7.5 Hz, 2H), 5.95 (d, *J* = 1.1 Hz, 1H), 5.72 (s, 1H), 5.13 (p, *J* = 7.5 Hz, 1H), 2.48 (t, *J* = 7.5 Hz, 2H), 2.17 (q, *J* = 7.5 Hz, 2H), 1.19 (s, 18H) ppm. **<sup>13</sup>C NMR** (101 MHz, CDCl<sub>3</sub>) δ 198.5, 179.2, 146.6, 137.6, 132.3, 129.6, 128.3, 127.8, 58.2, 38.9, 32.5, 28.5, 27.4 ppm. **HRMS**: [M+H]<sup>+</sup> *calcd.* For C<sub>22</sub>H<sub>33</sub>N<sub>2</sub>O<sub>3</sub><sup>+</sup> 373.2486, found 373.2488. The diastereomeric ratio was determined by NMR ***dr* >20:1**.

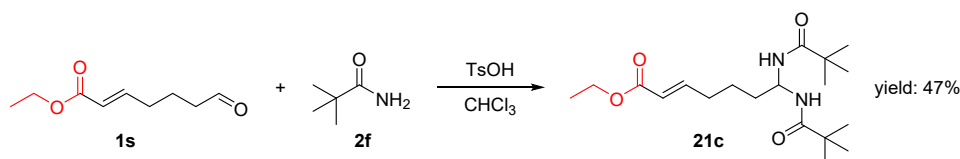

A glass vial equipped with a magnetic stirring bar was charged with **1s** (0.1 mmol, 1.0 equiv), TsOH (1.7 mg, 0.1 equiv) and amide **2f** (0.12 mmol, 1.2 equiv) in CHCl<sub>3</sub> (0.5 mL) and the resultant solution was stirred at 25 °C until the material **1s** disappeared. After completion of the reaction, the reaction mixture was purified by column chromatography on silica gel (petroleum ether/ethyl acetate = 3:1) to afford **21c** (10 mg, 47%) as a white solid. **<sup>1</sup>H NMR** (500 MHz, CDCl<sub>3</sub>) δ 6.90 (p, *J* = 7.7, 6.9 Hz, 3H), 5.80 (d, *J* = 15.7 Hz, 1H), 5.05 (p, *J* = 7.7 Hz, 1H), 4.17 (q, *J* = 7.1 Hz, 2H), 2.21 (q, *J* = 7.4 Hz, 2H), 1.97 (q, *J* = 7.8 Hz, 2H), 1.45 (p, *J* = 7.5 Hz, 2H), 1.28 (t, *J* = 7.1 Hz, 3H), 1.15 (t, *J* = 1.3 Hz, 18H) ppm. **<sup>13</sup>C NMR** (101 MHz, CDCl<sub>3</sub>) δ 179.2, 166.6, 148.3, 121.8, 60.2, 58.4, 38.8, 32.8, 31.5, 27.3, 24.7, 14.3 ppm. **HRMS**: [M+H]<sup>+</sup> *calcd.* For C<sub>19</sub>H<sub>35</sub>N<sub>2</sub>O<sub>4</sub><sup>+</sup> 355.2591, found 355.2591. The diastereomeric ratio was determined by NMR ***dr* >20:1**.

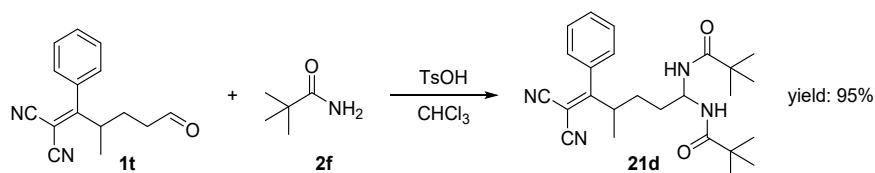

A glass vial equipped with a magnetic stirring bar was charged with **1t** (0.1 mmol, 1.0 equiv), TsOH (1.7 mg, 0.1 equiv) and amide **2f** (0.12 mmol, 1.2 equiv) in CHCl<sub>3</sub> (0.5 mL) and the resultant solution was stirred at 25 °C until the material **1t** disappeared. After

completion of the reaction, the reaction mixture was purified by column chromatography on silica gel (petroleum ether/ethyl acetate = 2.5:1) to afford **21d** (24 mg, 95%) as a white solid. **<sup>1</sup>H NMR** (400 MHz, CDCl<sub>3</sub>) δ 7.54 – 7.43 (m, 3H), 7.23 – 7.15 (m, 2H), 6.93 (dd, *J* = 7.7, 2.4 Hz, 2H), 5.04 (p, *J* = 7.6 Hz, 1H), 3.28 (dt, *J* = 7.7, 6.7 Hz, 1H), 2.14 – 1.92 (m, 2H), 1.60 – 1.36 (m, 2H), 1.20 (d, *J* = 6.9 Hz, 3H), 1.14 (s, 9H), 1.13 (s, 9H) ppm. **<sup>13</sup>C NMR** (101 MHz, CDCl<sub>3</sub>) δ 185.1, 179.4, 133.9, 130.7, 129.0, 126.9, 111.9, 111.8, 87.7, 58.2, 41.4, 38.8, 31.4, 31.3, 27.3, 18.8 ppm. **HRMS**: [M+H]<sup>+</sup> *calcd.* For C<sub>25</sub>H<sub>35</sub>N<sub>4</sub>O<sub>2</sub><sup>+</sup> 423.2755, found 423.2756. The diastereomeric ratio was determined by NMR *dr* >20:1.

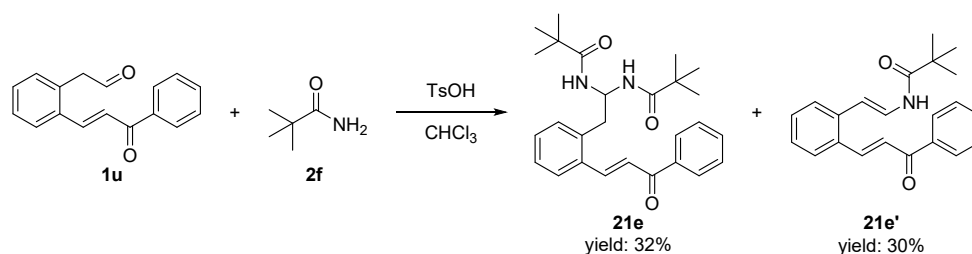

A glass vial equipped with a magnetic stirring bar was charged with **1u** (0.1 mmol, 1.0 equiv), TsOH (1.7 mg, 0.1 equiv) and amide **2f** (0.12 mmol, 1.2 equiv) in CHCl<sub>3</sub> (0.5 mL) and the resultant solution was stirred at 25 °C until the material **1u** disappeared. After completion of the reaction, the reaction mixture was purified by column chromatography on silica gel (petroleum ether/ethyl acetate = 3:1) to afford **21e** (14 mg, 32%) as a white solid and **21e'** (10 mg, 30%) as a yellow solid.

**21e**: **<sup>1</sup>H NMR** (400 MHz, CDCl<sub>3</sub>) δ 8.14 (d, *J* = 15.5 Hz, 1H), 8.07 – 8.01 (m, 2H), 7.73 (dd, *J* = 7.5, 1.7 Hz, 1H), 7.62 – 7.56 (m, 1H), 7.56 – 7.46 (m, 3H), 7.37 – 7.27 (m, 2H), 7.25 (dd, *J* = 7.3, 1.7 Hz, 1H), 6.88 (d, *J* = 7.6 Hz, 2H), 5.30 (p, *J* = 7.6 Hz, 1H), 3.47 (d, *J* = 7.6 Hz, 2H), 1.09 (s, 18H) ppm. **<sup>13</sup>C NMR** (101 MHz, CDCl<sub>3</sub>) δ 190.3, 179.1, 141.5, 138.1, 137.6, 134.2, 132.9, 131.6, 130.2, 128.7, 128.6, 127.5, 126.8, 124.2, 59.2, 38.8, 36.7, 27.3 ppm. **HRMS**: [M+H]<sup>+</sup> *calcd.* For C<sub>27</sub>H<sub>35</sub>N<sub>2</sub>O<sub>3</sub><sup>+</sup> 435.2642, found 435.2648. The diastereomeric ratio was determined by NMR *dr* >20:1.

**21e'**:  $^1\text{H NMR}$  (400 MHz,  $\text{CDCl}_3$ )  $\delta$  8.18 (d,  $J = 15.4$  Hz, 1H), 8.07 – 8.02 (m, 2H), 7.67 (dd,  $J = 7.9, 1.3$  Hz, 1H), 7.62 – 7.58 (m, 1H), 7.56 – 7.44 (m, 6H), 7.38 – 7.33 (m, 1H), 7.29 – 7.22 (m, 1H), 6.52 (d,  $J = 14.3$  Hz, 1H), 1.30 (s, 9H) ppm.  $^{13}\text{C NMR}$  (101 MHz,  $\text{CDCl}_3$ )  $\delta$  190.1, 175.9, 142.3, 137.0, 133.0, 132.3, 130.6, 128.7, 128.5, 126.9, 126.9, 126.1, 125.7, 123.3, 108.9, 38.9, 27.4 ppm. **HRMS**:  $[\text{M}+\text{H}]^+$  *calcd.* For  $\text{C}_{22}\text{H}_{24}\text{NO}_2^+$  334.1802, found 334.1812. The diastereomeric ratio was determined by NMR *dr* >20:1.

## O2. Amides with no products formed:

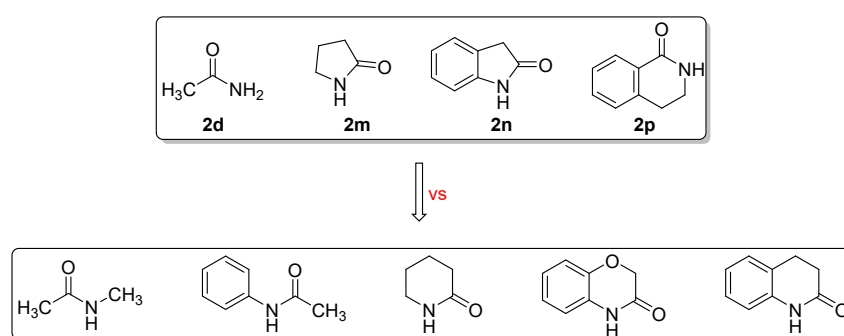

**Scheme S4.** amides with larger steric hindrance

Compared to amides **2d**, **2m**, **2n** and **2p**, the reactions of **1a** and amides with larger steric hindrance all failed, that **1a** disappeared and amides remained without product (**Scheme S4**).

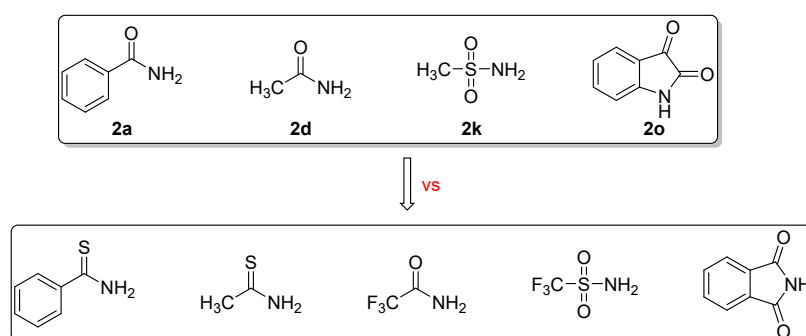

**Scheme S5.** amides with more acidic N-H

Compared to amides **2a**, **2e**, **2d** and **2s**, the reactions of **1a** and amides with more acidic N-H all failed, that **1a** disappeared and amides remained without product (**Scheme S5**).

## P. The stability of **1a** in present of **A2**:

**A:** **1a** in CDCl<sub>3</sub> (with 0.1 M PhOCH<sub>3</sub> as internal standard)

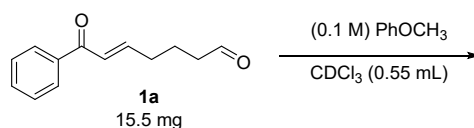

**A:** **1a** (15.5 mg) was dissolved in CDCl<sub>3</sub> (0.55 mL) containing PhOCH<sub>3</sub> (0.1 M) as internal standard. The mixture was used for crude NMR to get the purification of **1a** without **A2** after 12 h, 36 h, 60 h at room temperature.

**B:** **1a**, **A2** (10 mol%) in CDCl<sub>3</sub> (with 0.1 M PhOCH<sub>3</sub> as internal standard)

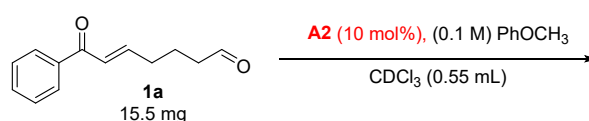

**B:** To the solution of **1a** (15.5 mg) in CDCl<sub>3</sub>(0.55 mL) containing PhOCH<sub>3</sub> (0.1 M) as internal standard, **A2** (10 mol%) was added. The mixture was used for crude NMR to get the purification of **1a** in present of **A2** after 12 h, 36 h, 60 h at room temperature.

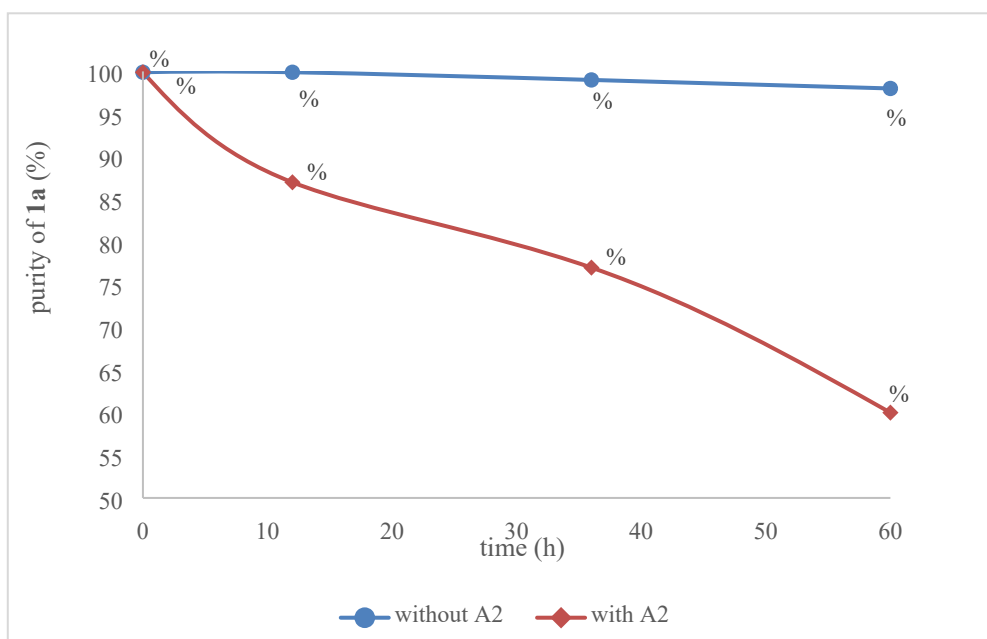

**Figure S6.** Purity of **1a** vs. time in CDCl<sub>3</sub>.

As shown on Figure S6, the purity of **1a** decreased sharply with **A2** means that **1a** is unstable in present of **A2**. Thus the reaction yield of **1** and **2f** is just moderate.

## Q. NMR spectra and HPLC traces:

### The $^1\text{H}$ NMR spectrum of ( $\pm$ )-3aa (400 MHz, $\text{CDCl}_3$ )

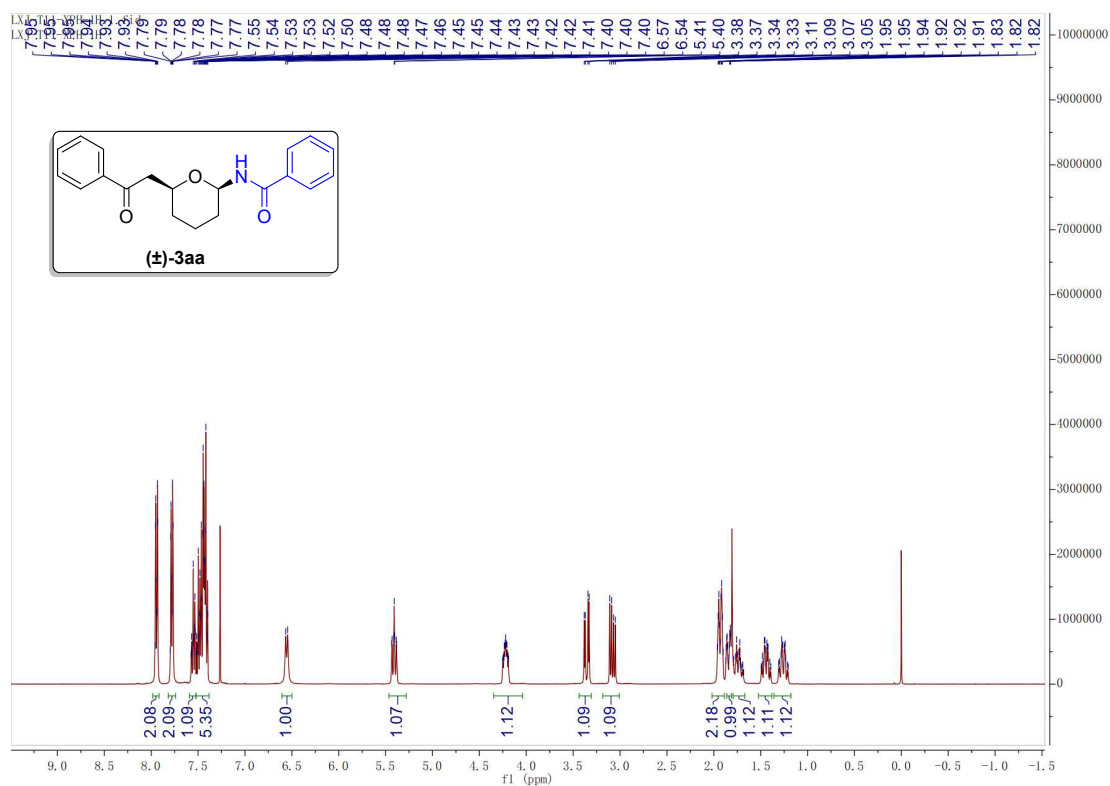

### The $^{13}\text{C}$ NMR spectrum of ( $\pm$ )-3aa (101 MHz, $\text{CDCl}_3$ )

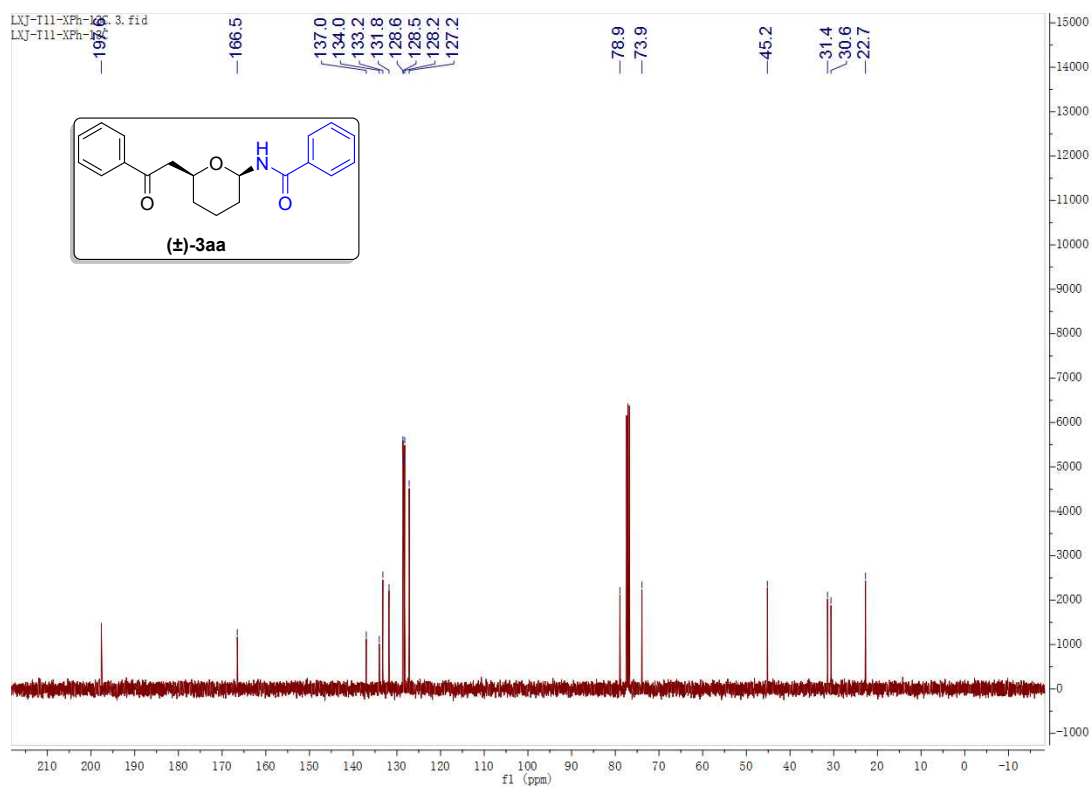

### The <sup>1</sup>H NMR spectrum of (±)-3ab (400 MHz, CDCl<sub>3</sub>)

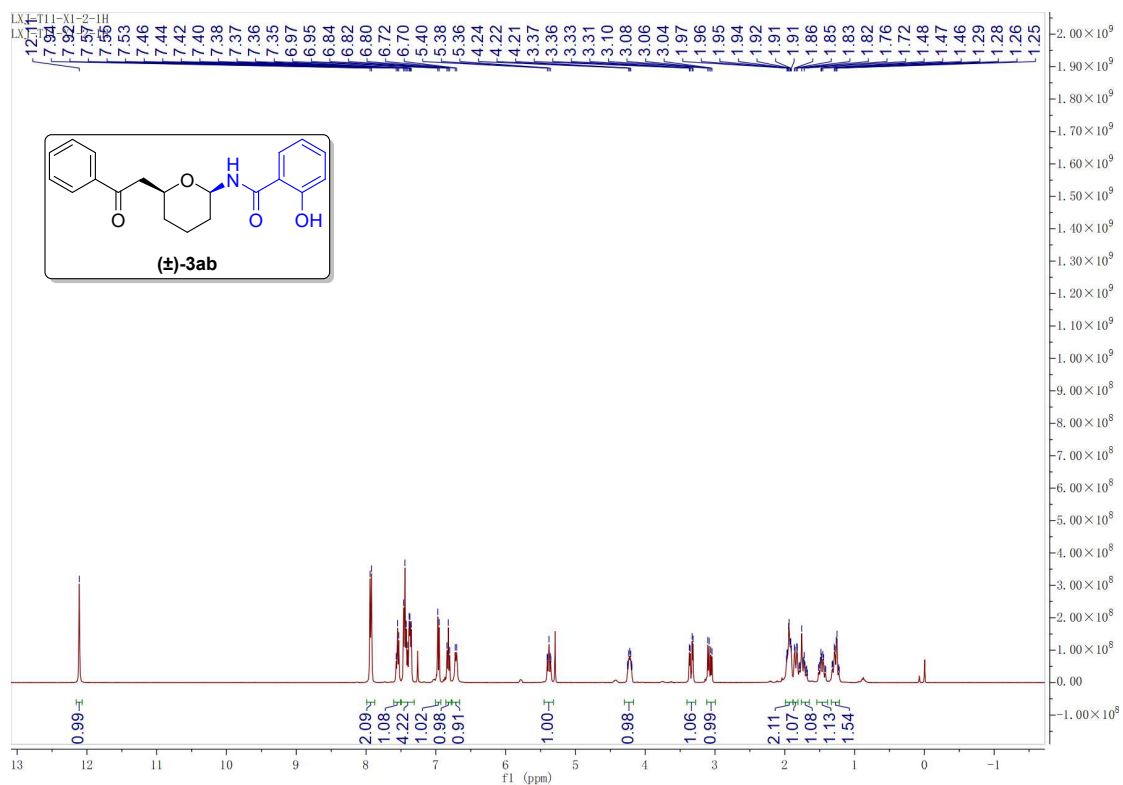

### The <sup>13</sup>C NMR spectrum of (±)-3ab (101 MHz, CDCl<sub>3</sub>)

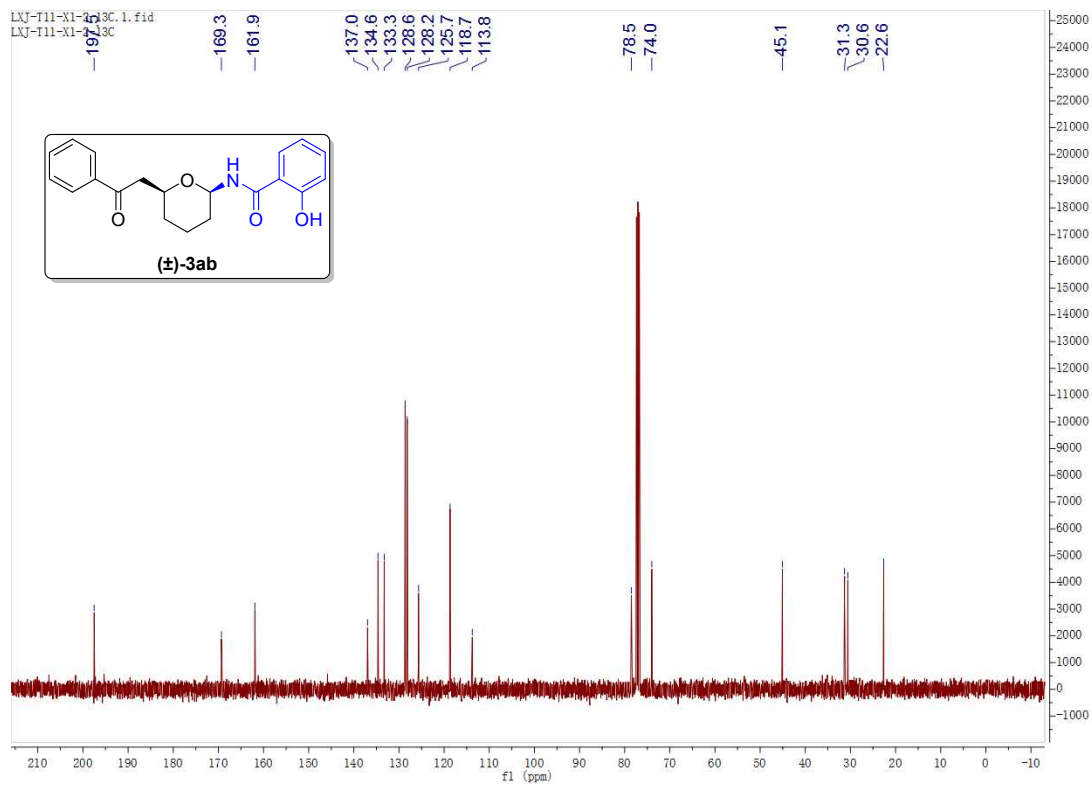



### The <sup>1</sup>H NMR spectrum of (±)-3ac (400 MHz, CDCl<sub>3</sub>)

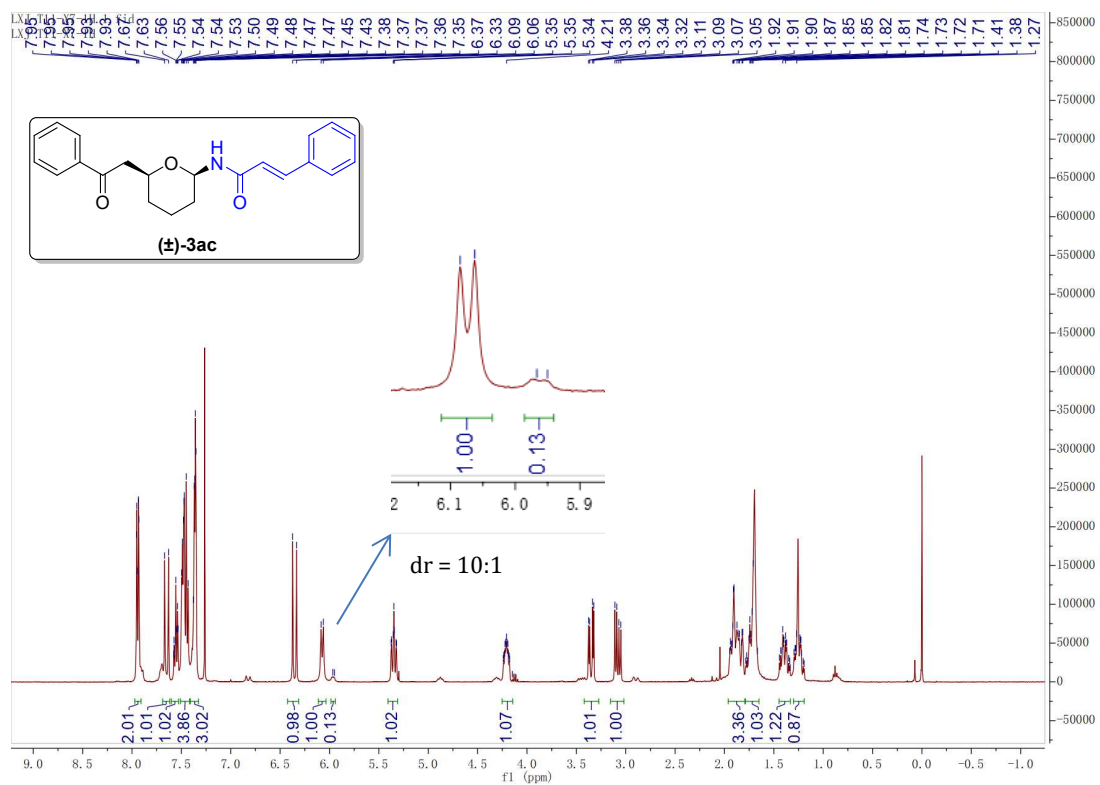

### The <sup>13</sup>C NMR spectrum of (±)-3ac (101 MHz, CDCl<sub>3</sub>)

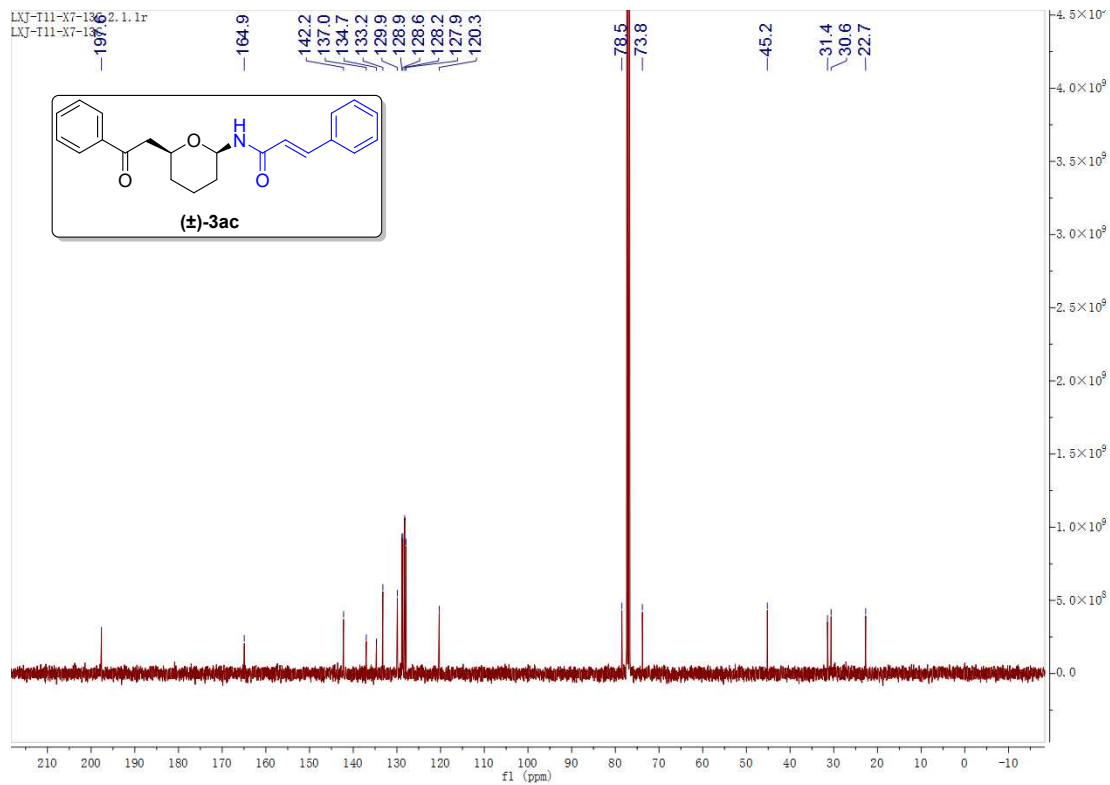

### The <sup>1</sup>H NMR spectrum of (±)-3ad (400 MHz, CDCl<sub>3</sub>)

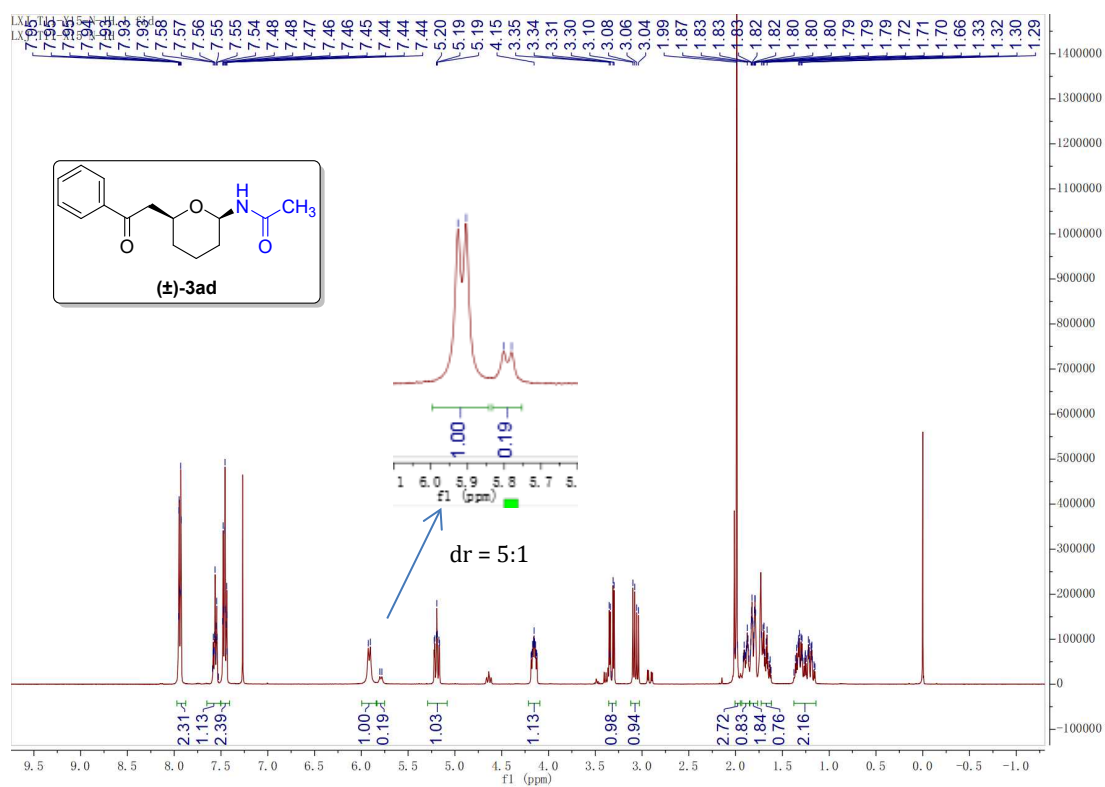

### The <sup>13</sup>C NMR spectrum of (±)-3ad (101 MHz, CDCl<sub>3</sub>)

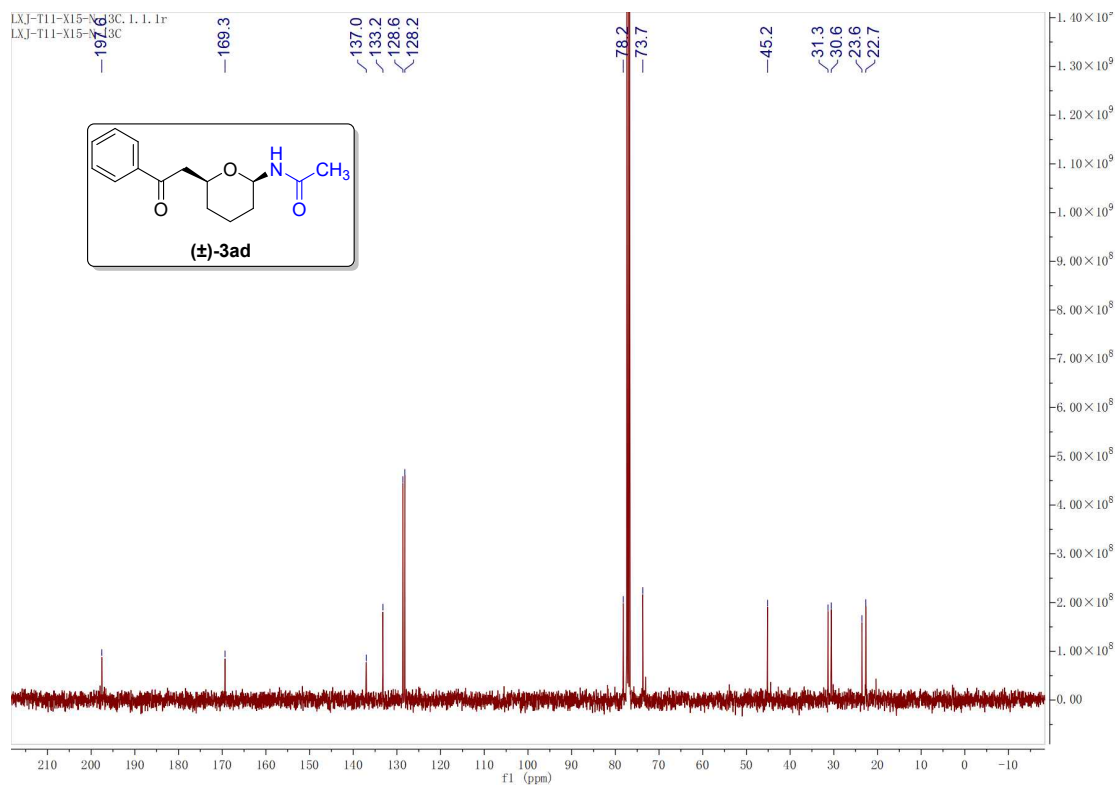

### The $^1\text{H}$ NMR spectrum of ( $\pm$ )-3ae (400 MHz, $\text{CDCl}_3$ )

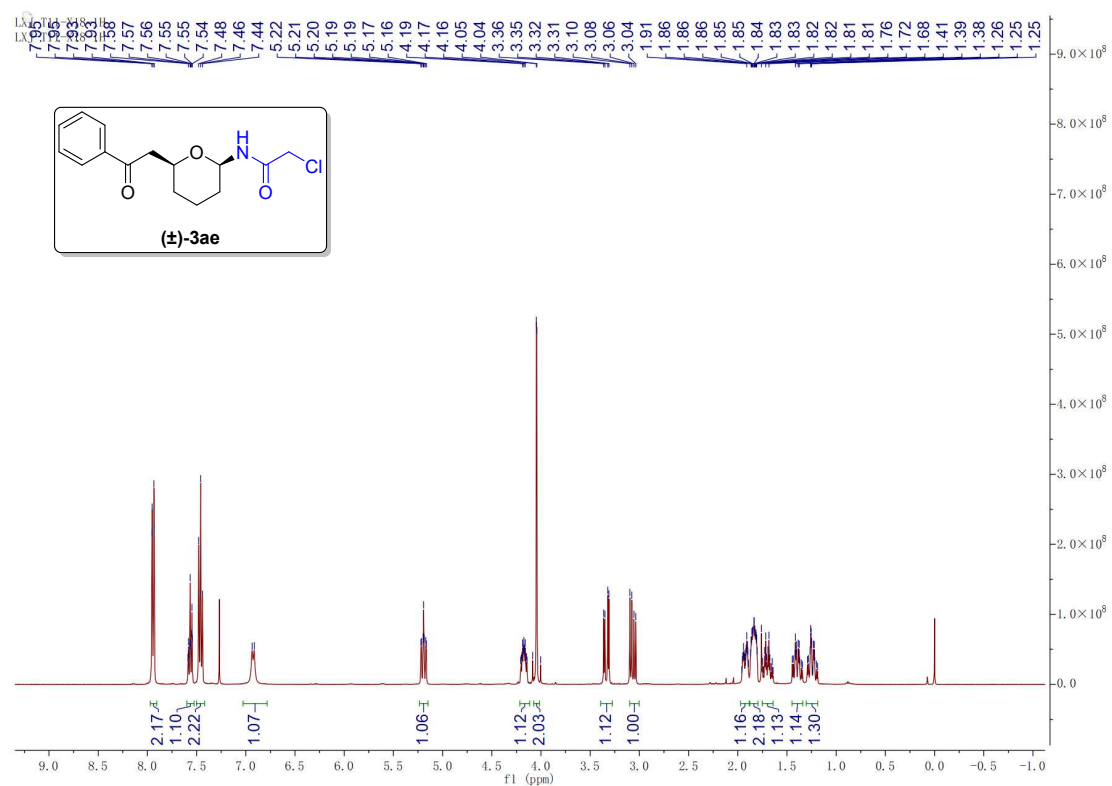

### The $^{13}\text{C}$ NMR spectrum of ( $\pm$ )-3ae (101 MHz, $\text{CDCl}_3$ )

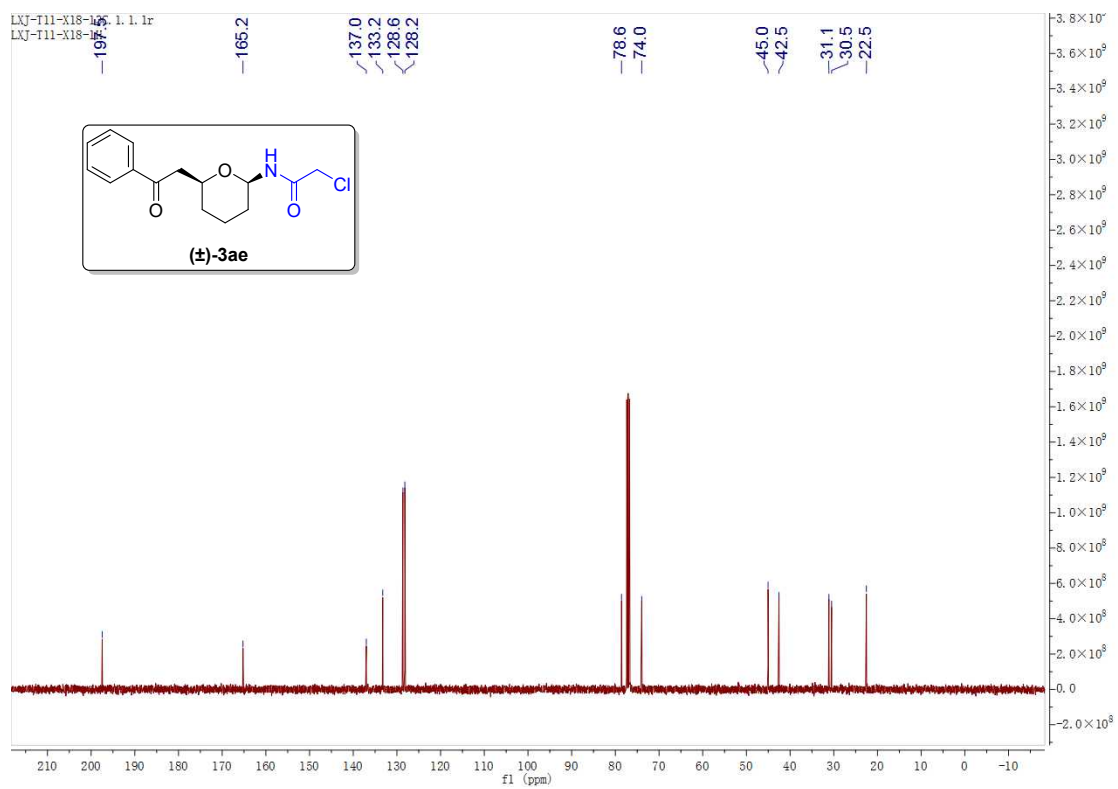

The  $^1\text{H}$  NMR spectrum of ( $\pm$ )-3af (400 MHz,  $\text{CDCl}_3$ )

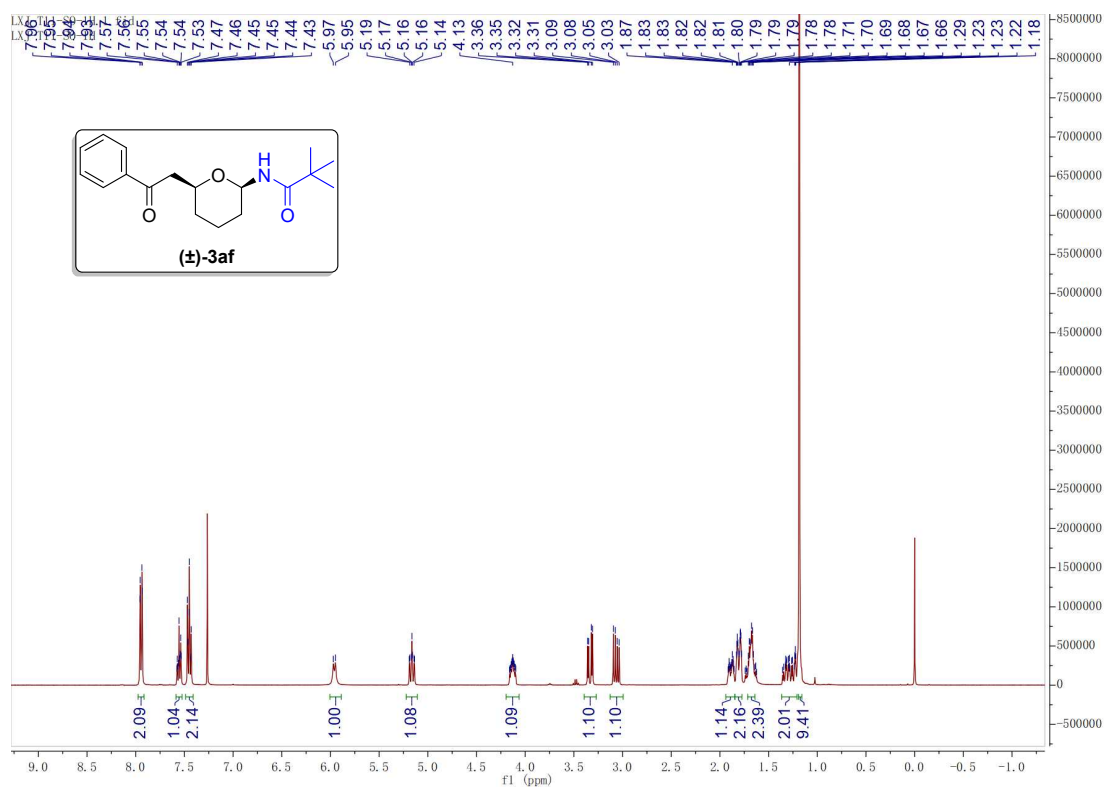

The  $^{13}\text{C}$  NMR spectrum of ( $\pm$ )-3af (101 MHz,  $\text{CDCl}_3$ )

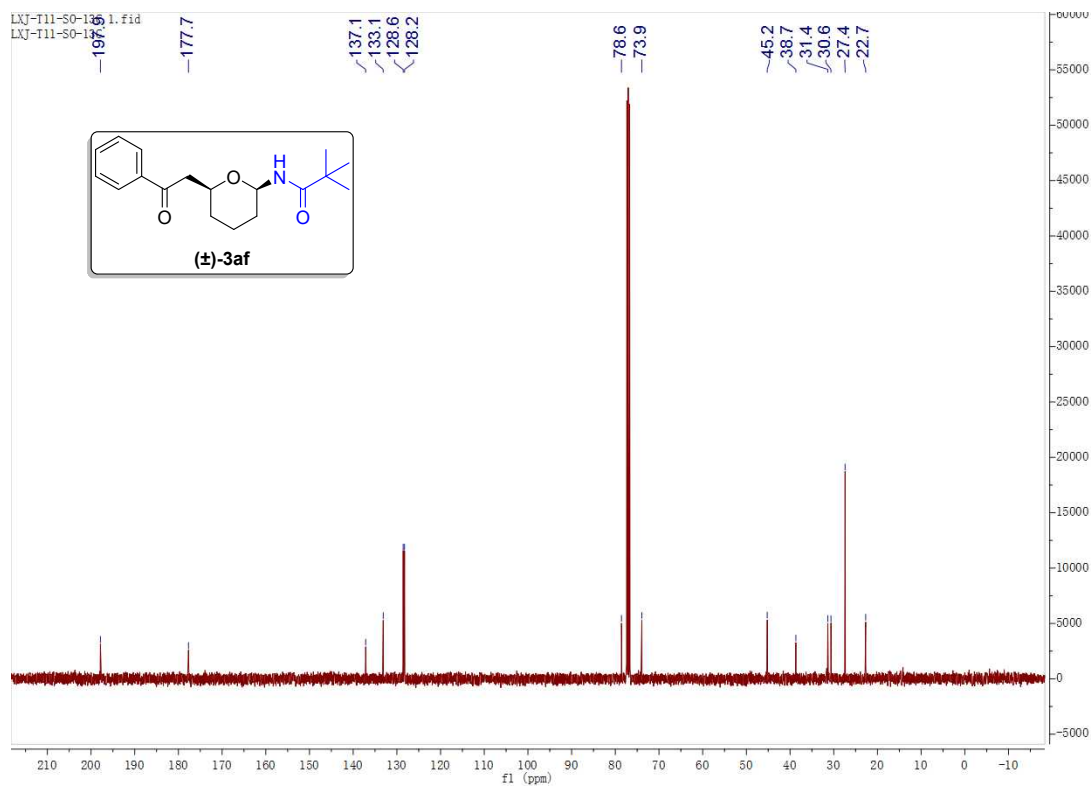

The <sup>1</sup>H NMR spectrum of (±)-3ag (500 MHz, CDCl<sub>3</sub>)

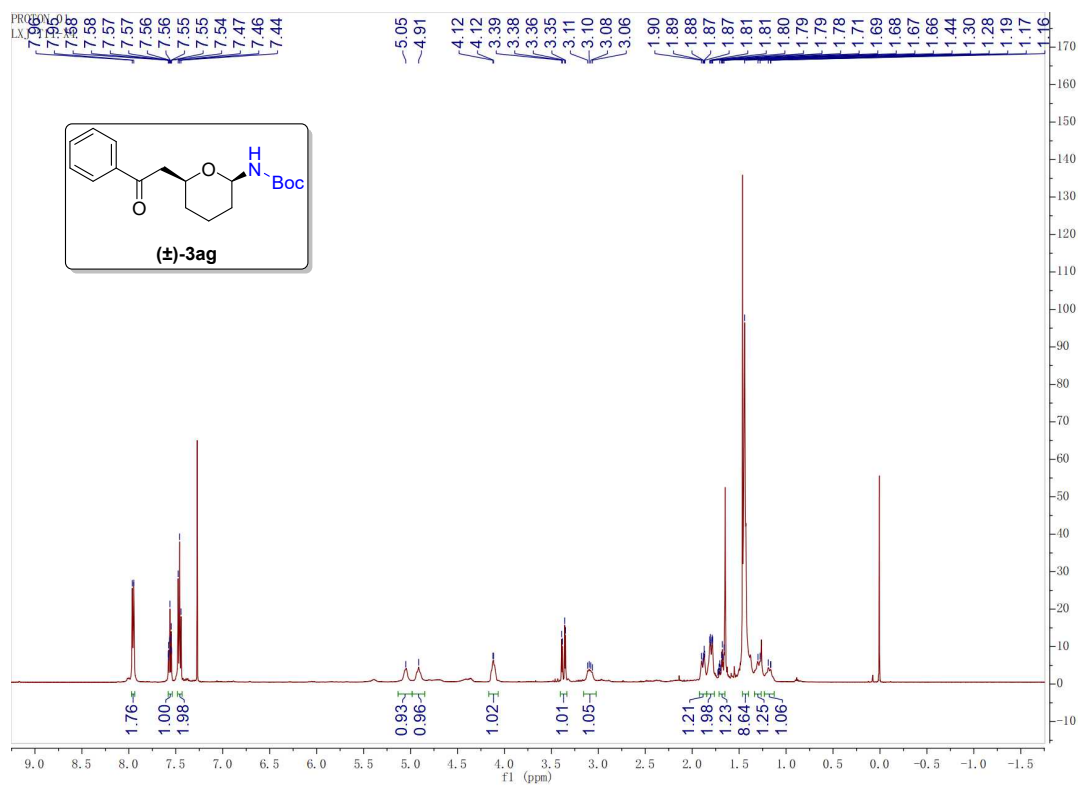

The <sup>13</sup>C NMR spectrum of (±)-3ag (125 MHz, CDCl<sub>3</sub>)

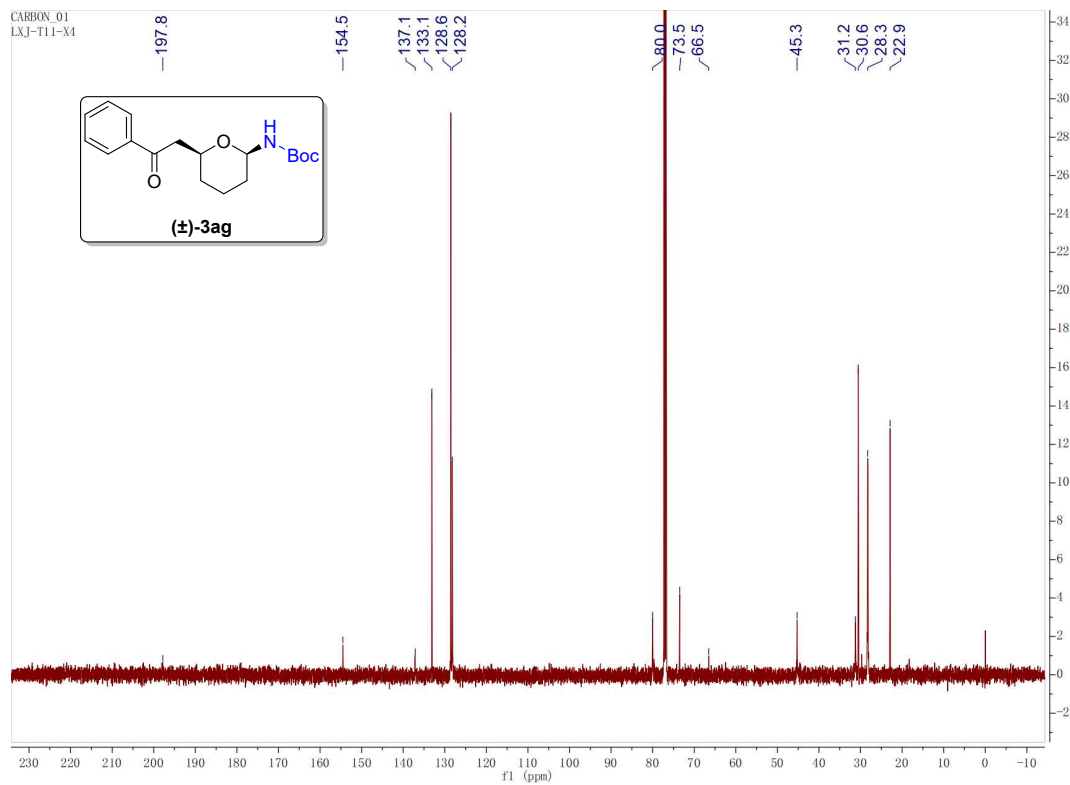

### The <sup>1</sup>H NMR spectrum of (±)-3ah (400 MHz, CDCl<sub>3</sub>)

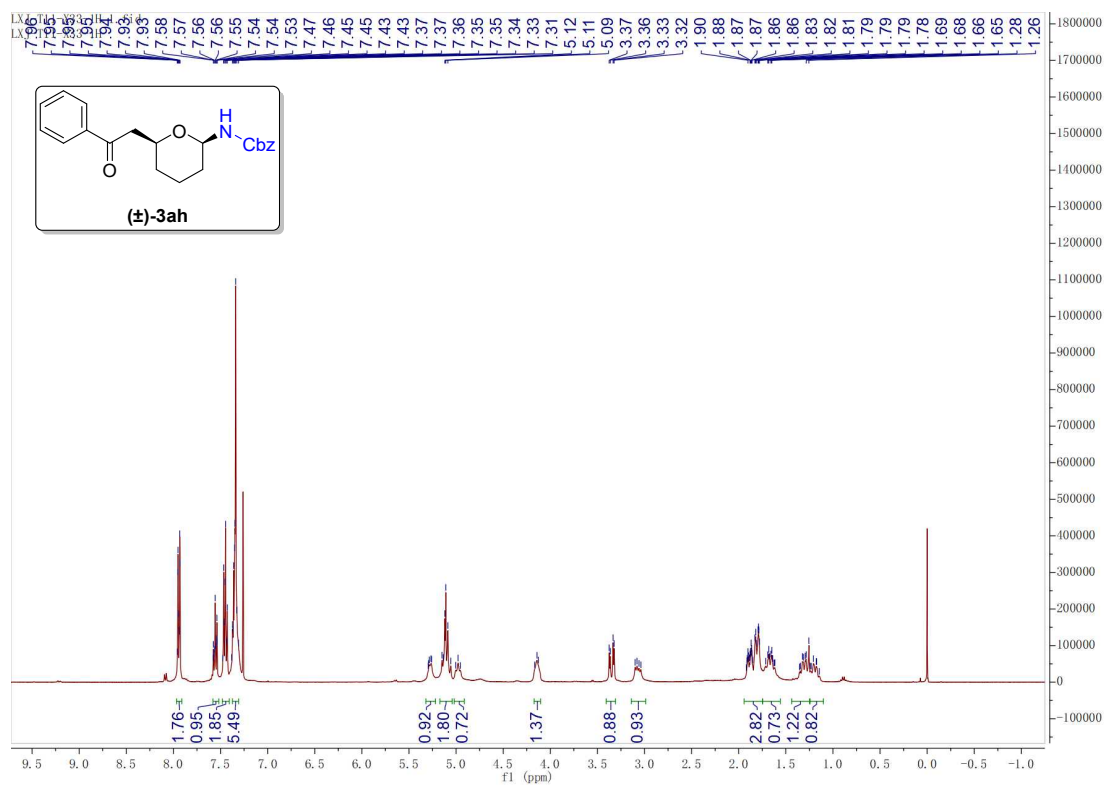

### The <sup>13</sup>C NMR spectrum of (±)-3ah (101 MHz, CDCl<sub>3</sub>)

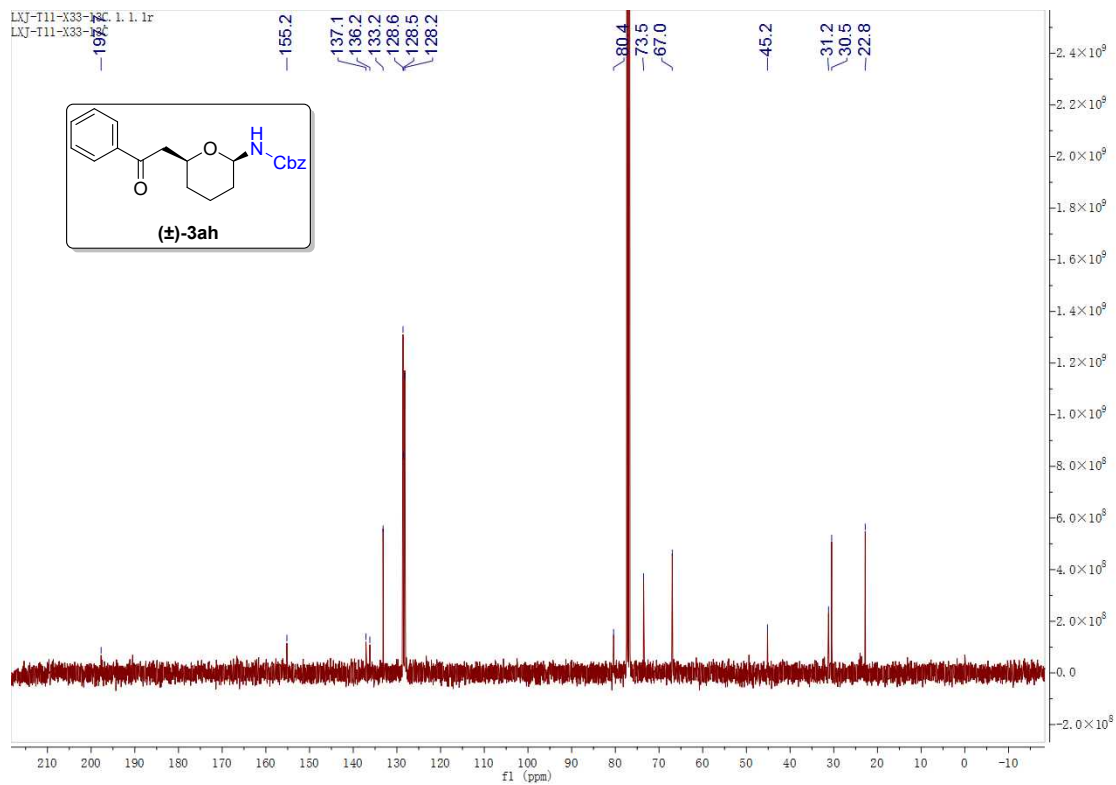

The <sup>1</sup>H NMR spectrum of (±)-3ai (400 MHz, CDCl<sub>3</sub>)

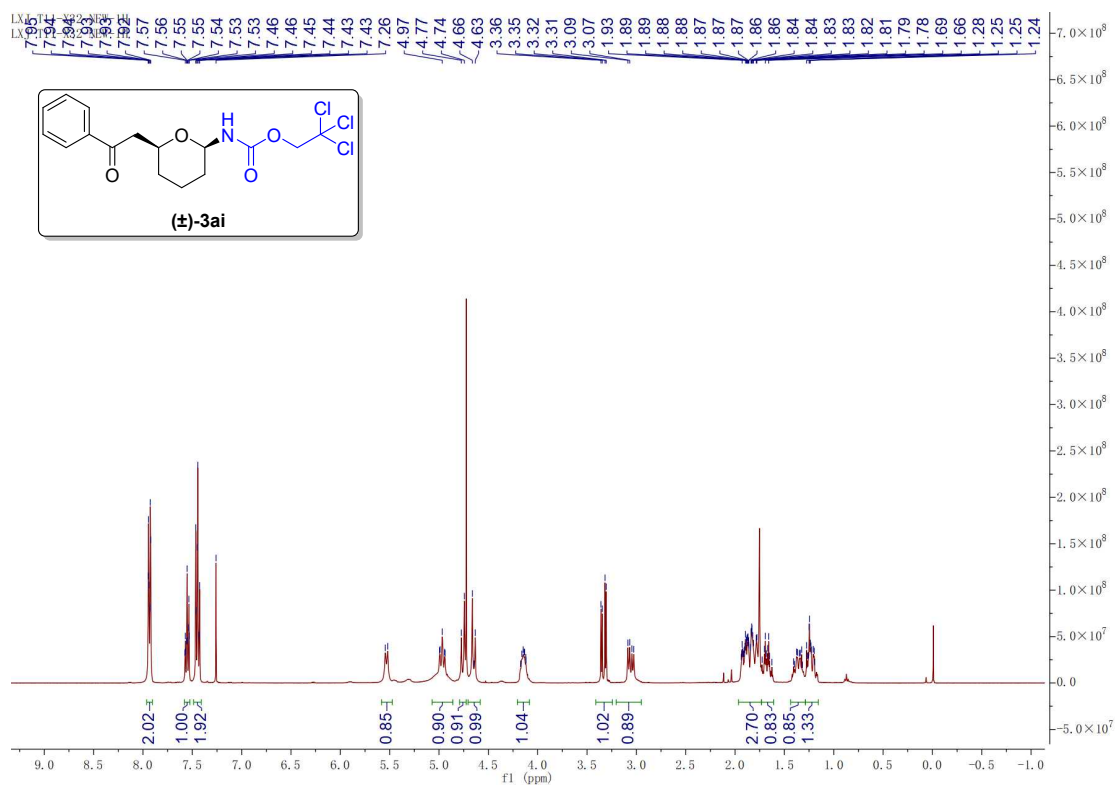

The <sup>13</sup>C NMR spectrum of (±)-3ai (101 MHz, CDCl<sub>3</sub>)

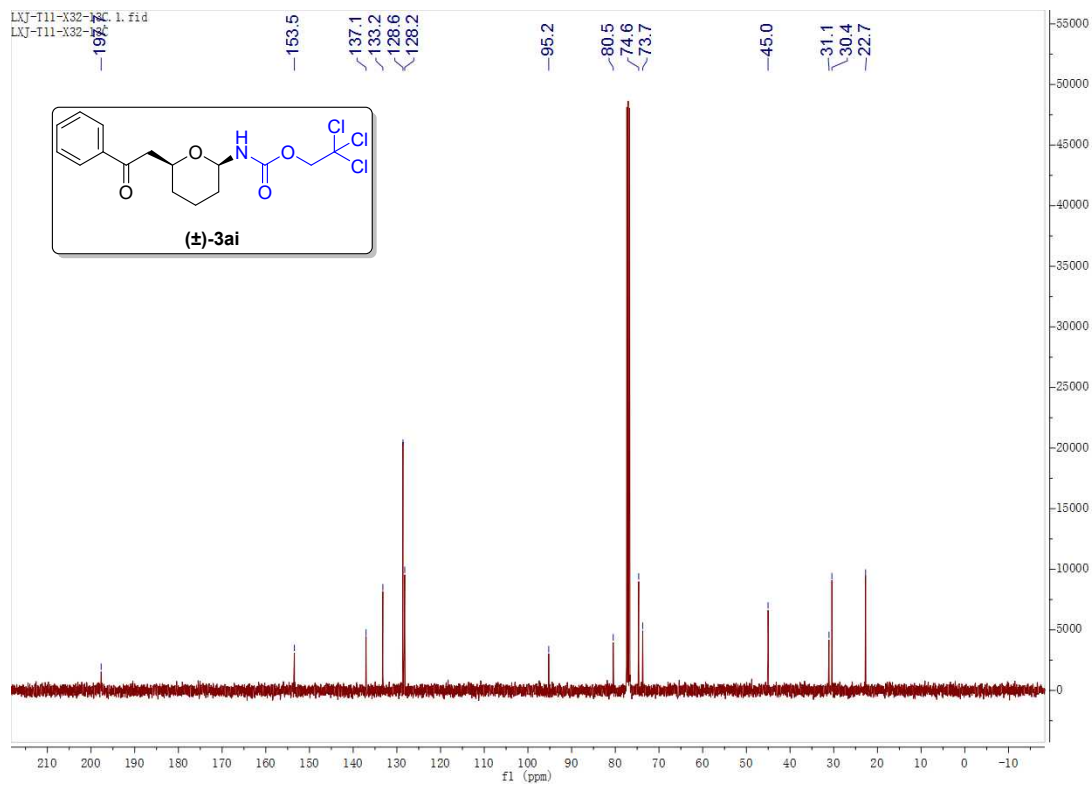



The  $^1\text{H}$  NMR spectrum of ( $\pm$ )-3aj (400 MHz,  $\text{CDCl}_3$ )

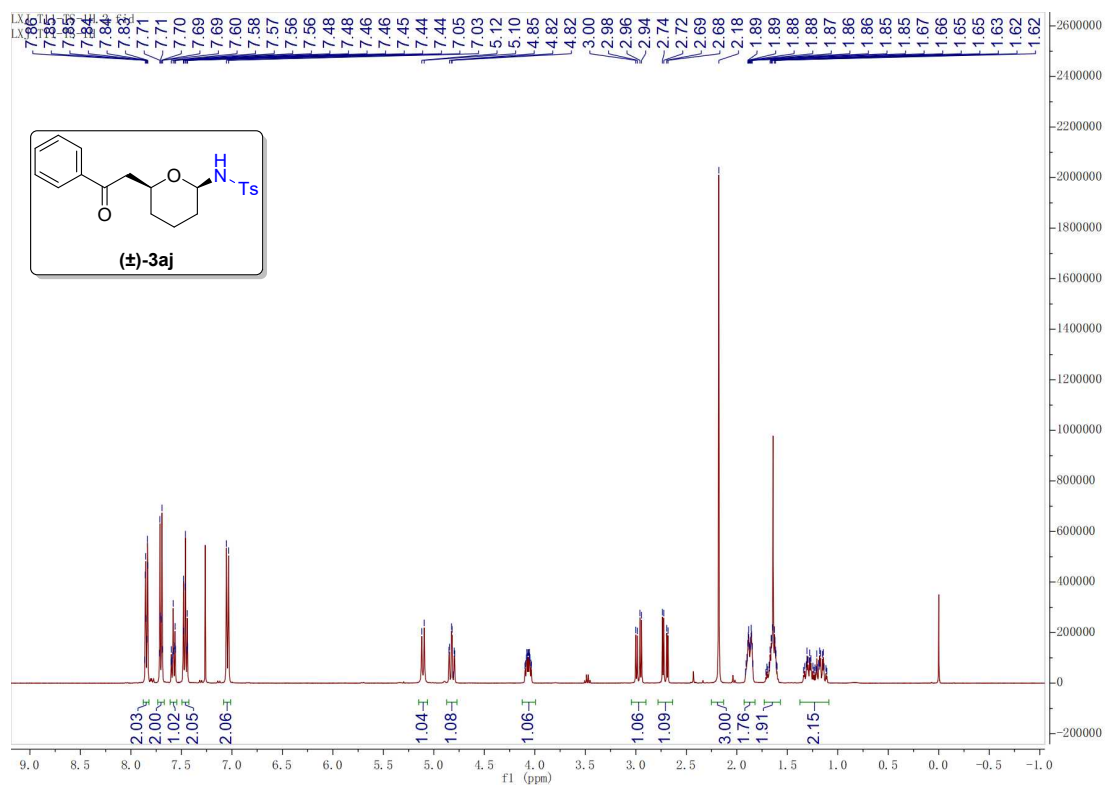

The  $^{13}\text{C}$  NMR spectrum of ( $\pm$ )-3aj (101 MHz,  $\text{CDCl}_3$ )

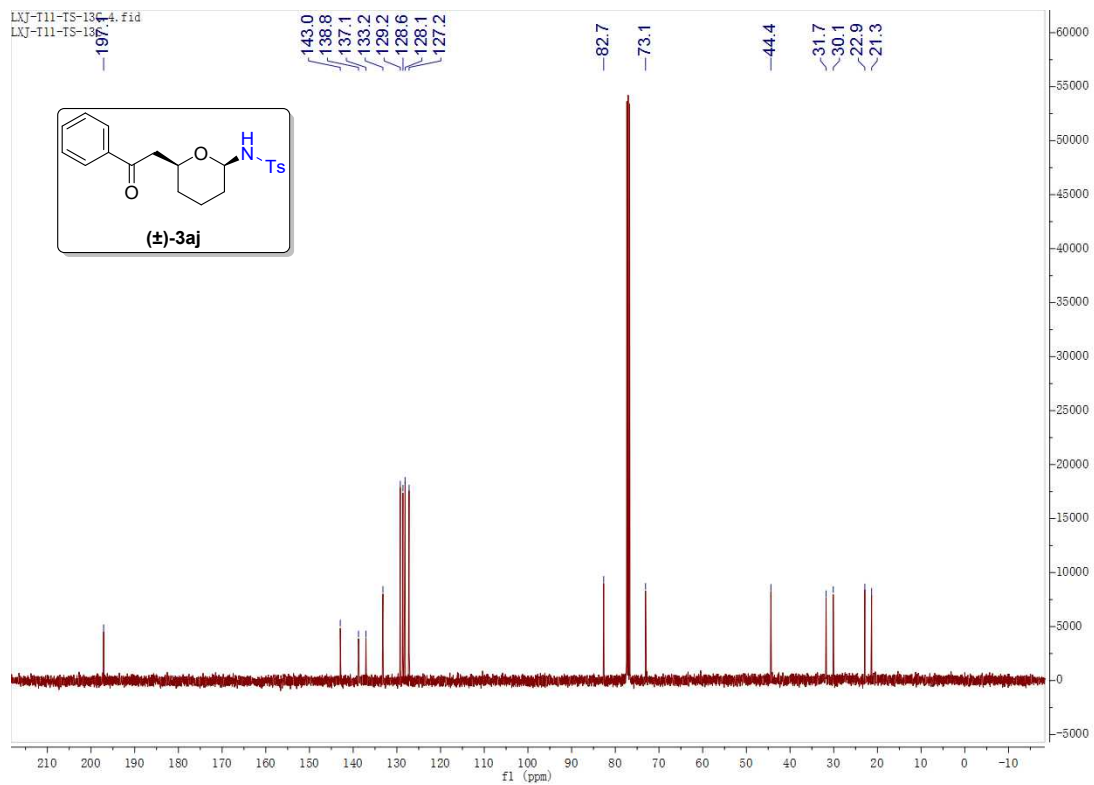

### The <sup>1</sup>H NMR spectrum of (±)-3ak (400 MHz, CDCl<sub>3</sub>)

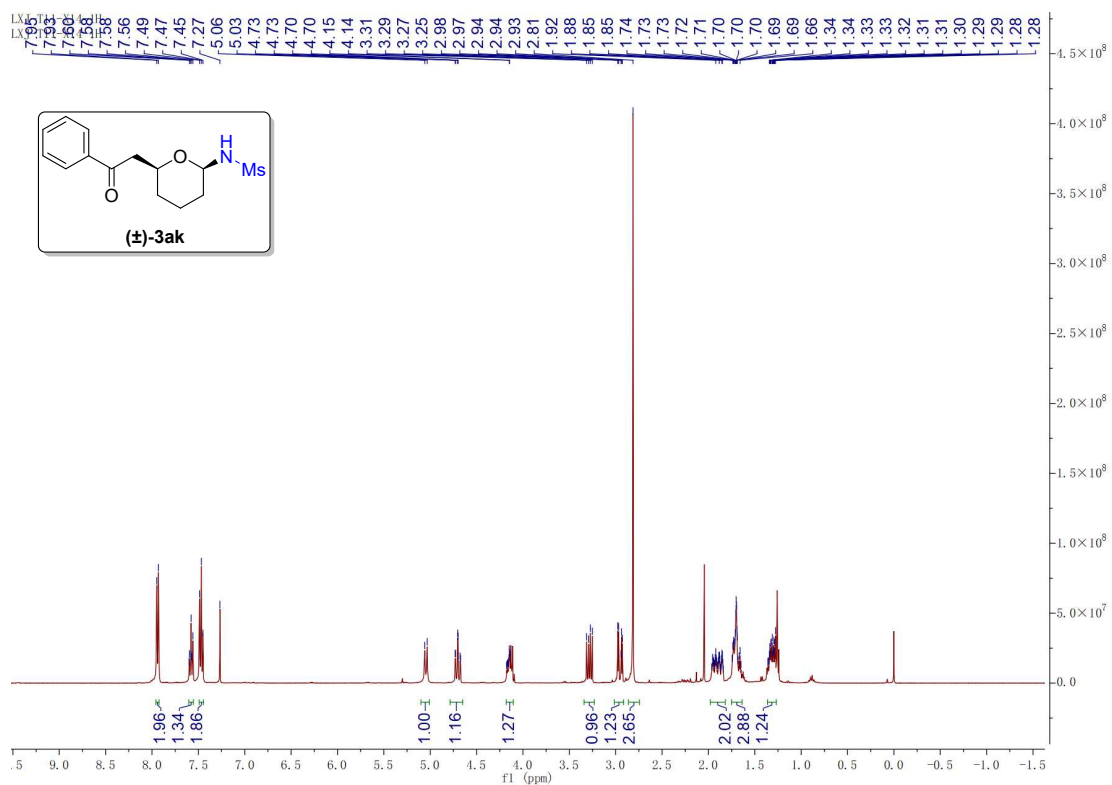

### The <sup>13</sup>C NMR spectrum of (±)-3ak (101 MHz, CDCl<sub>3</sub>)

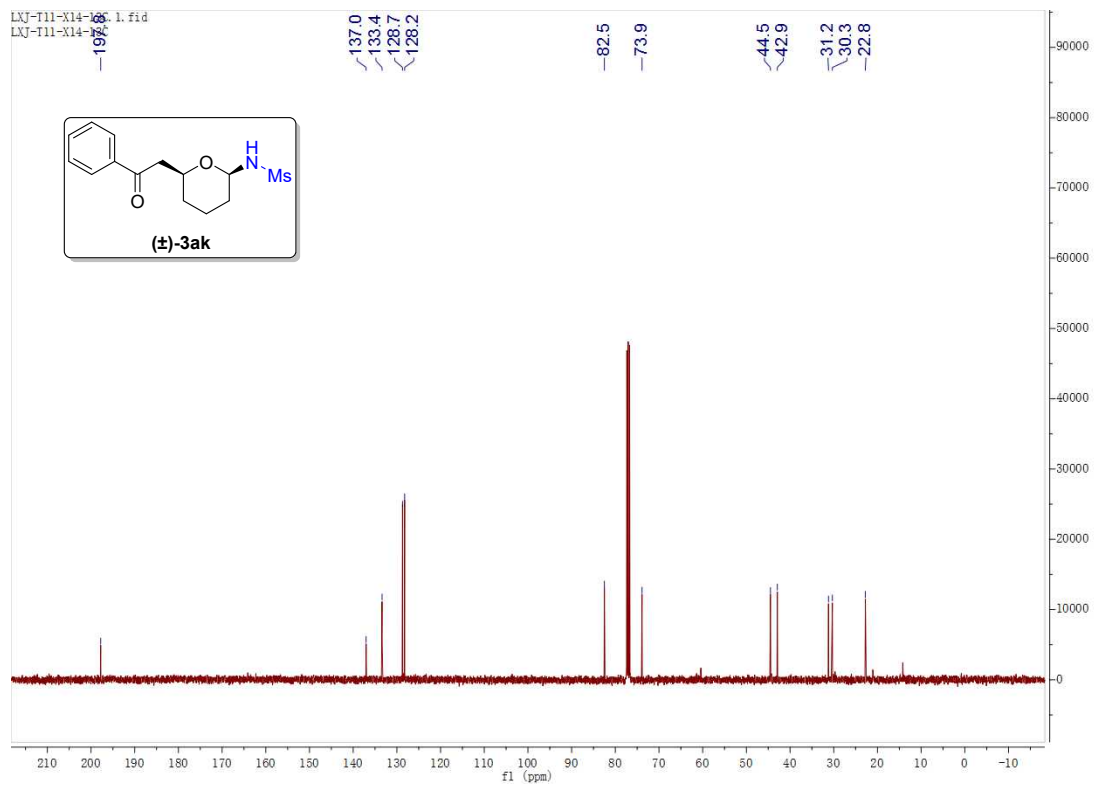

### The <sup>1</sup>H NMR spectrum of (±)-3al (500 MHz, CDCl<sub>3</sub>)

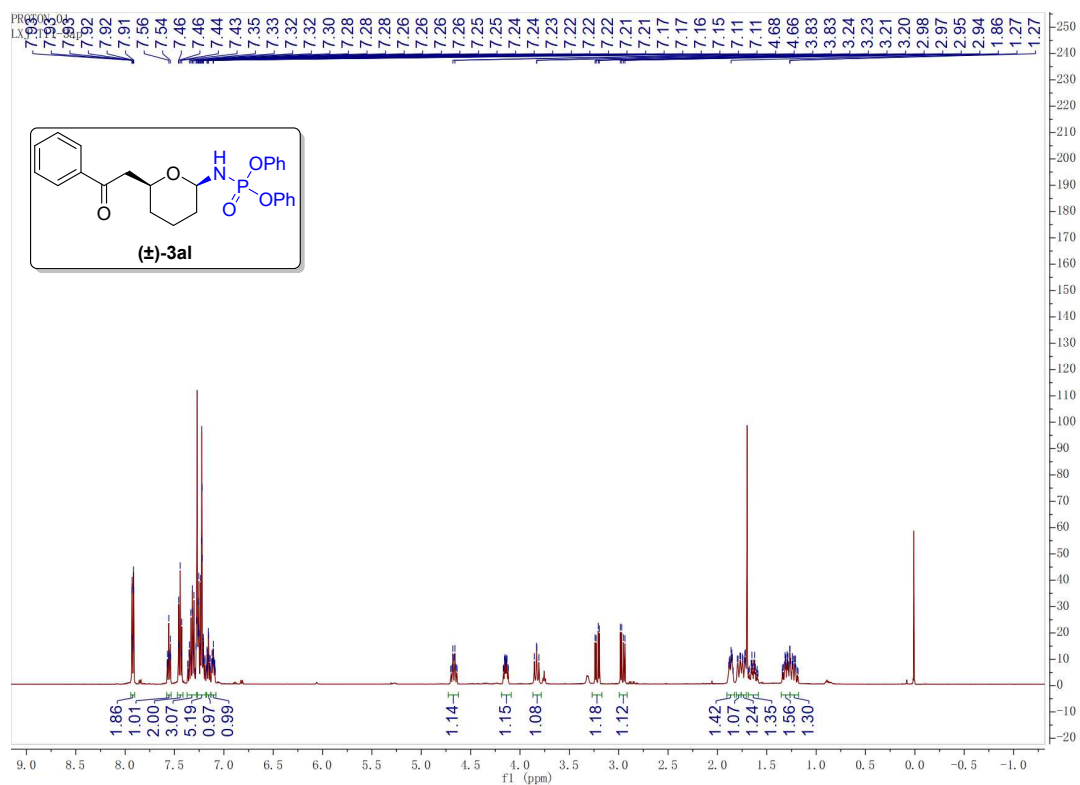

### The <sup>13</sup>C NMR spectrum of (±)-3al (101 MHz, CDCl<sub>3</sub>)

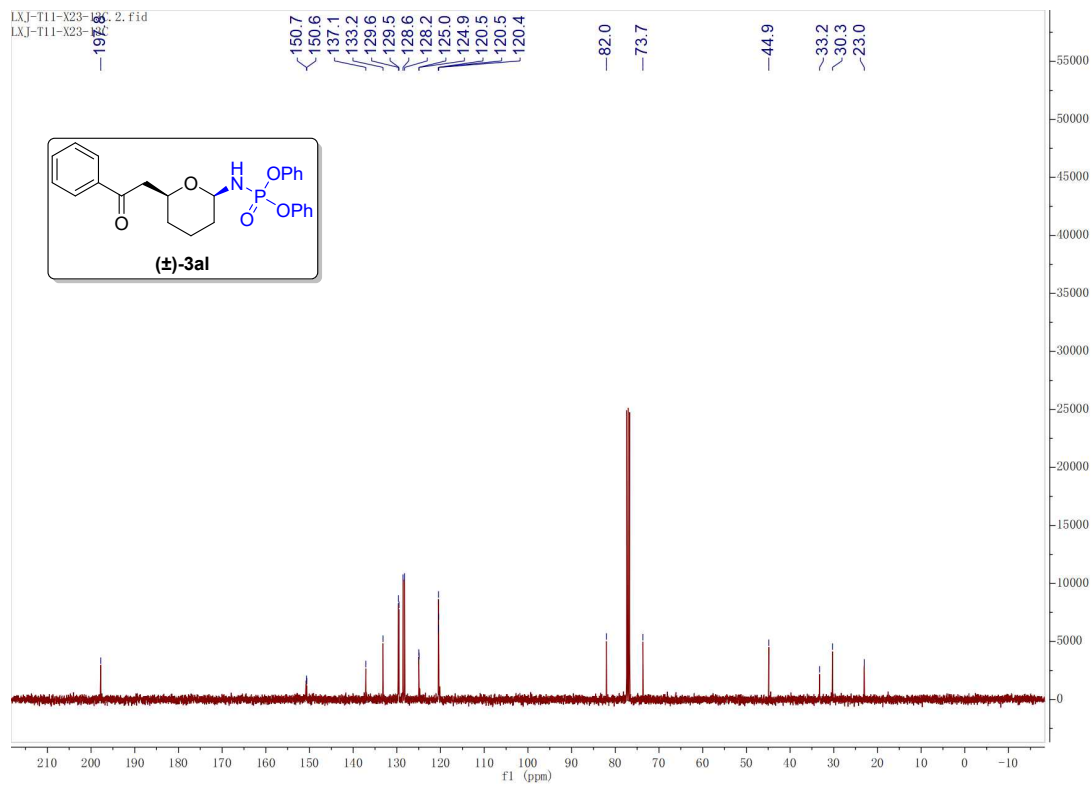

### The <sup>1</sup>H NMR spectrum of (±)-3am (400 MHz, CDCl<sub>3</sub>)

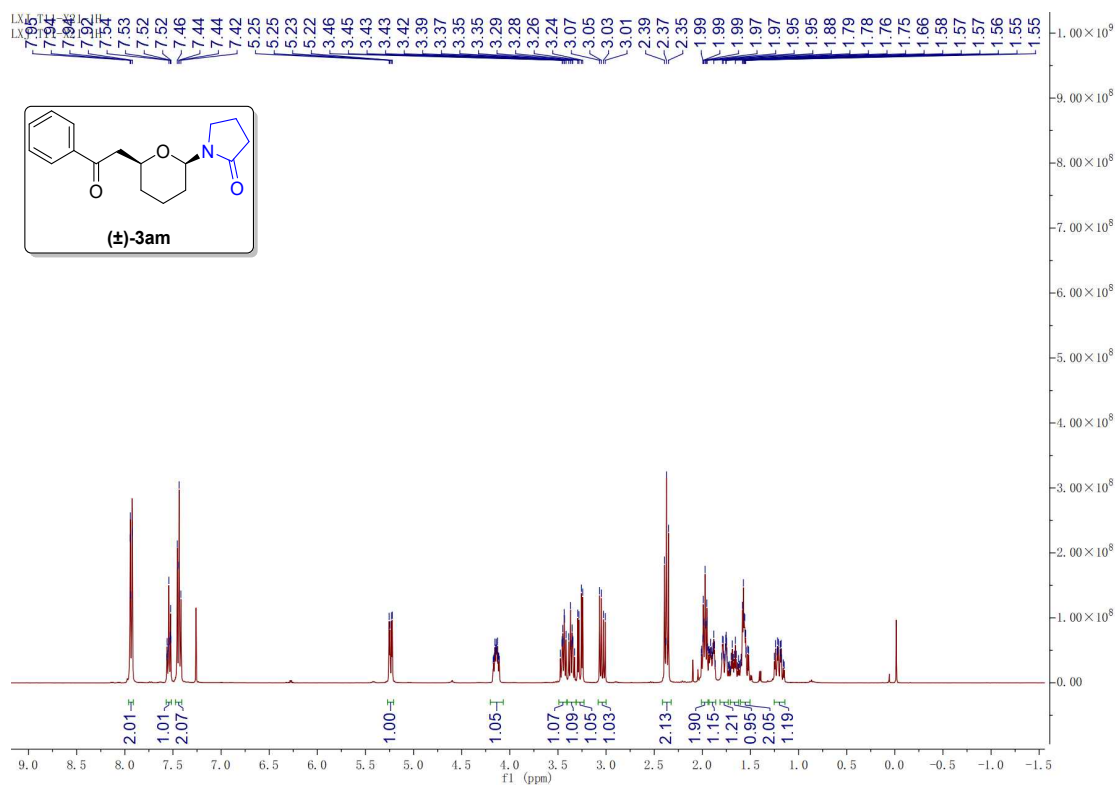

### The <sup>13</sup>C NMR spectrum of (±)-3am (101 MHz, CDCl<sub>3</sub>)

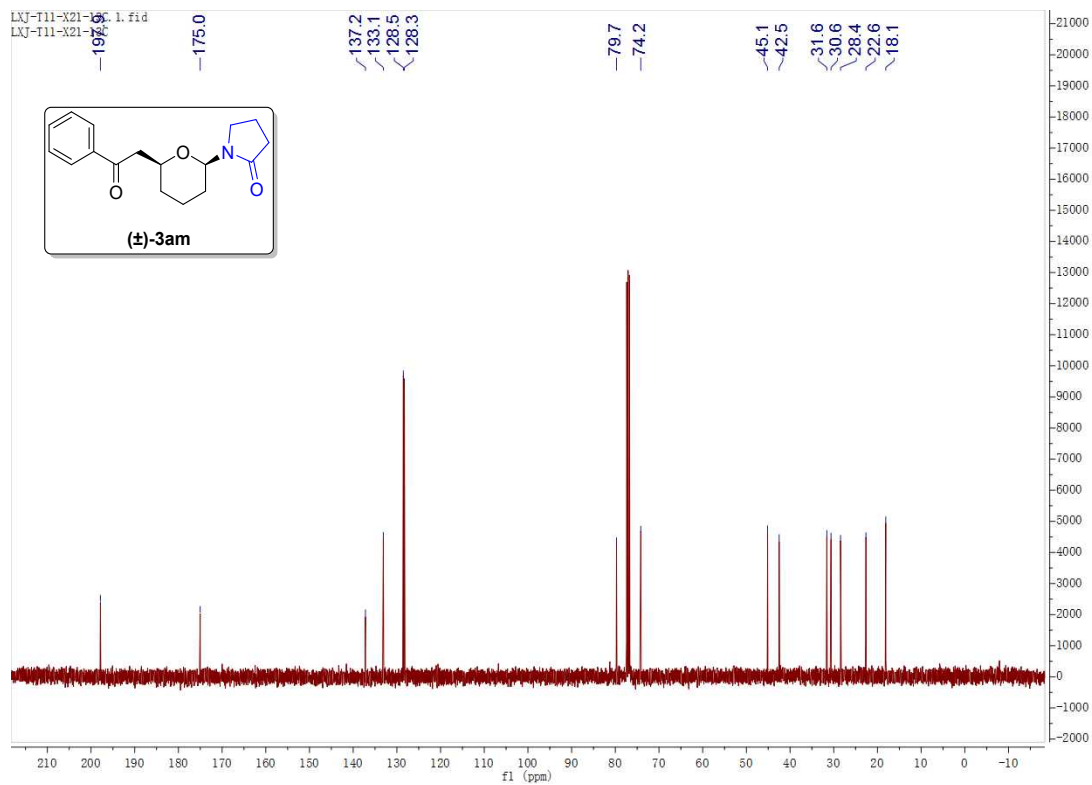

### The <sup>1</sup>H NMR spectrum of (±)-3an (400 MHz, CDCl<sub>3</sub>)

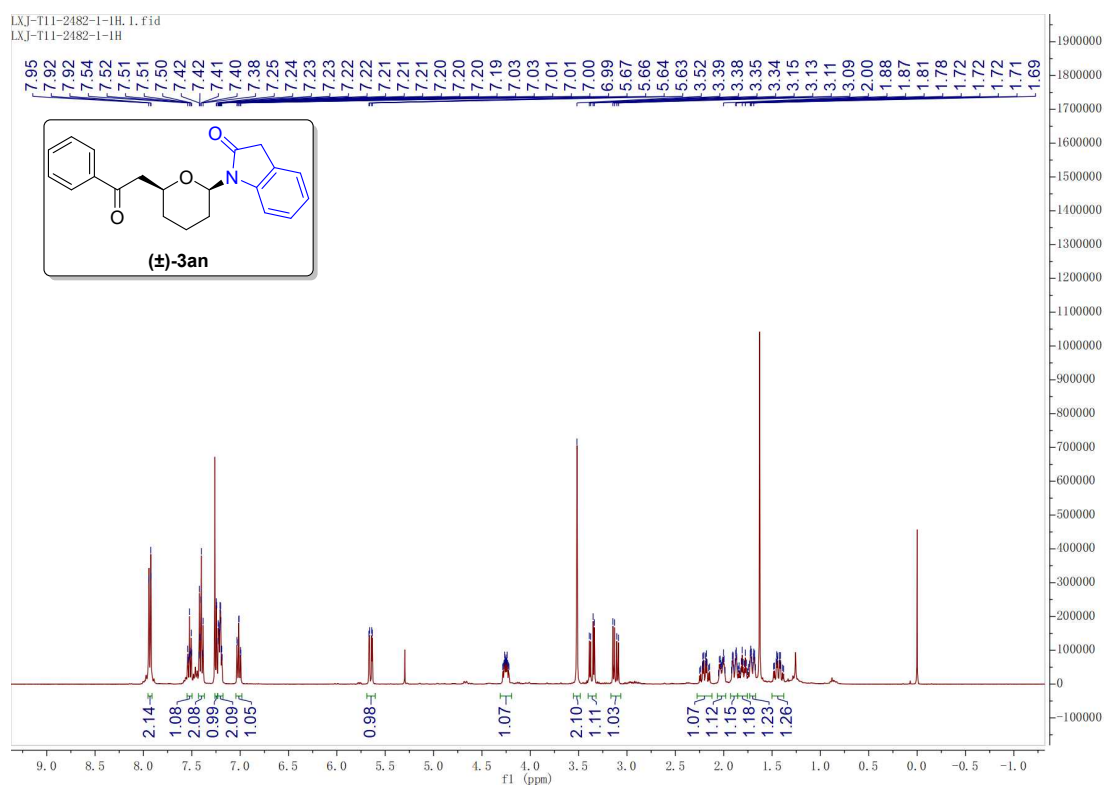

### The <sup>13</sup>C NMR spectrum of (±)-3an (101 MHz, CDCl<sub>3</sub>)

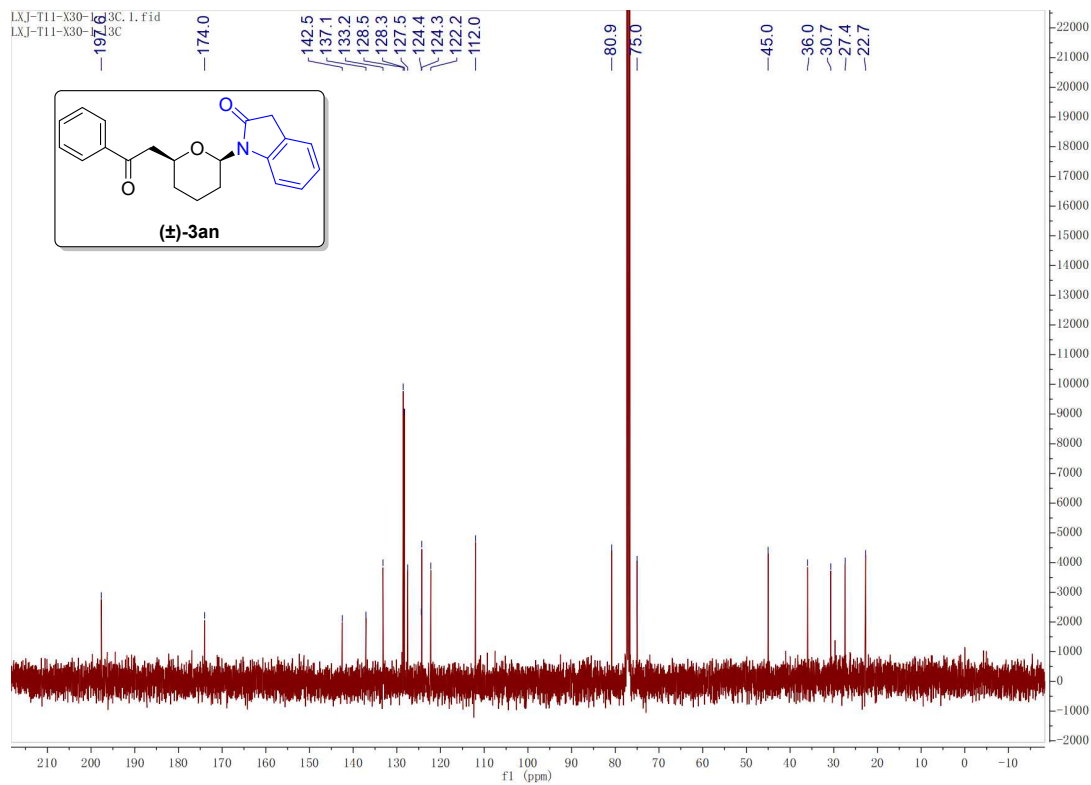

### The <sup>1</sup>H NMR spectrum of (±)-3ao (400 MHz, CDCl<sub>3</sub>)

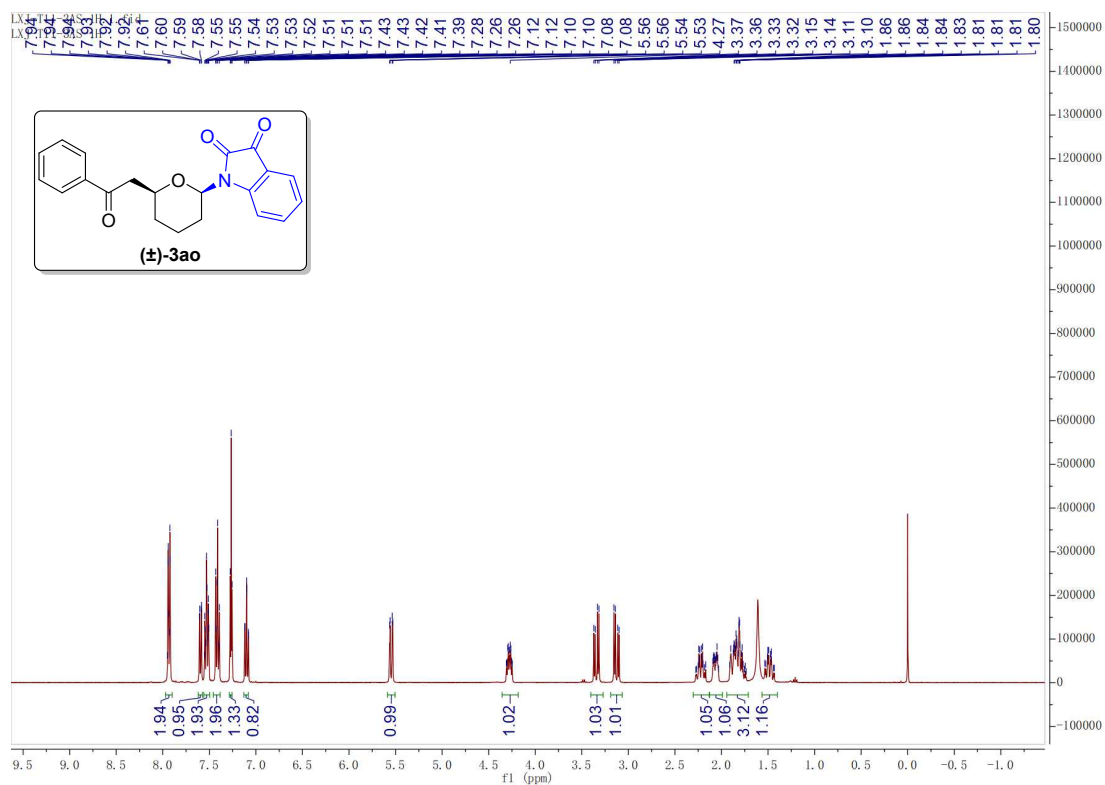

### The <sup>13</sup>C NMR spectrum of (±)-3ao (101 MHz, CDCl<sub>3</sub>)

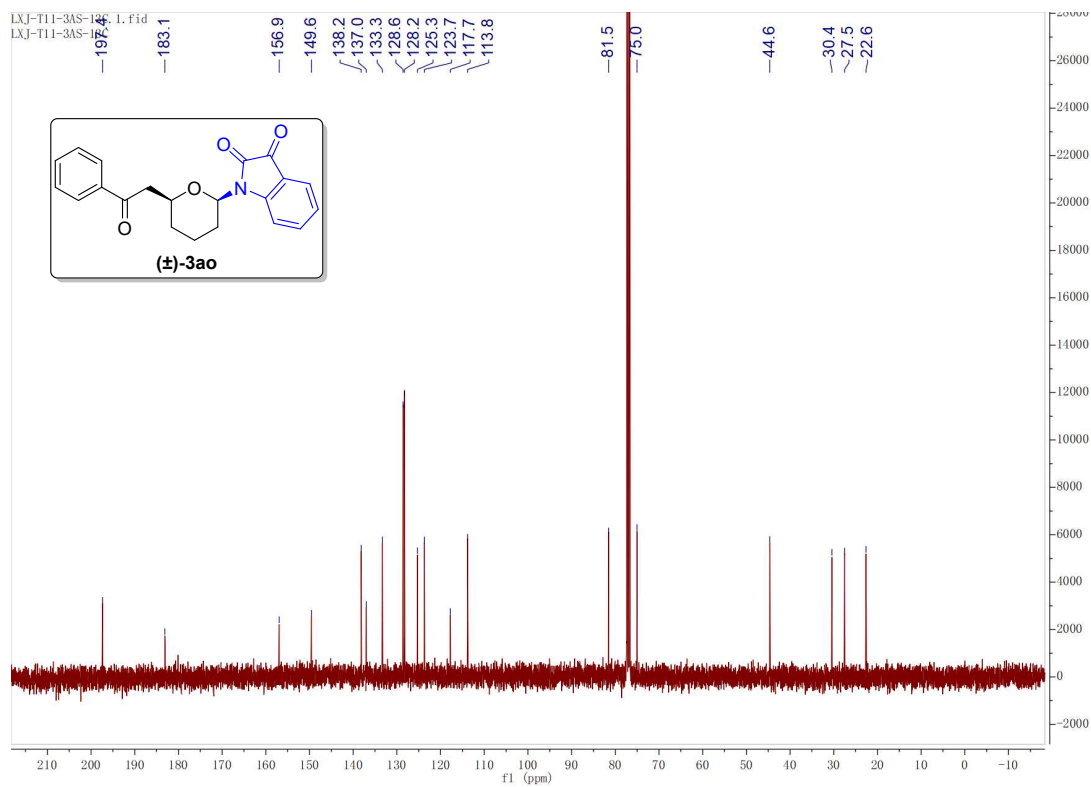

### The <sup>1</sup>H NMR spectrum of (±)-3ap (400 MHz, CDCl<sub>3</sub>)

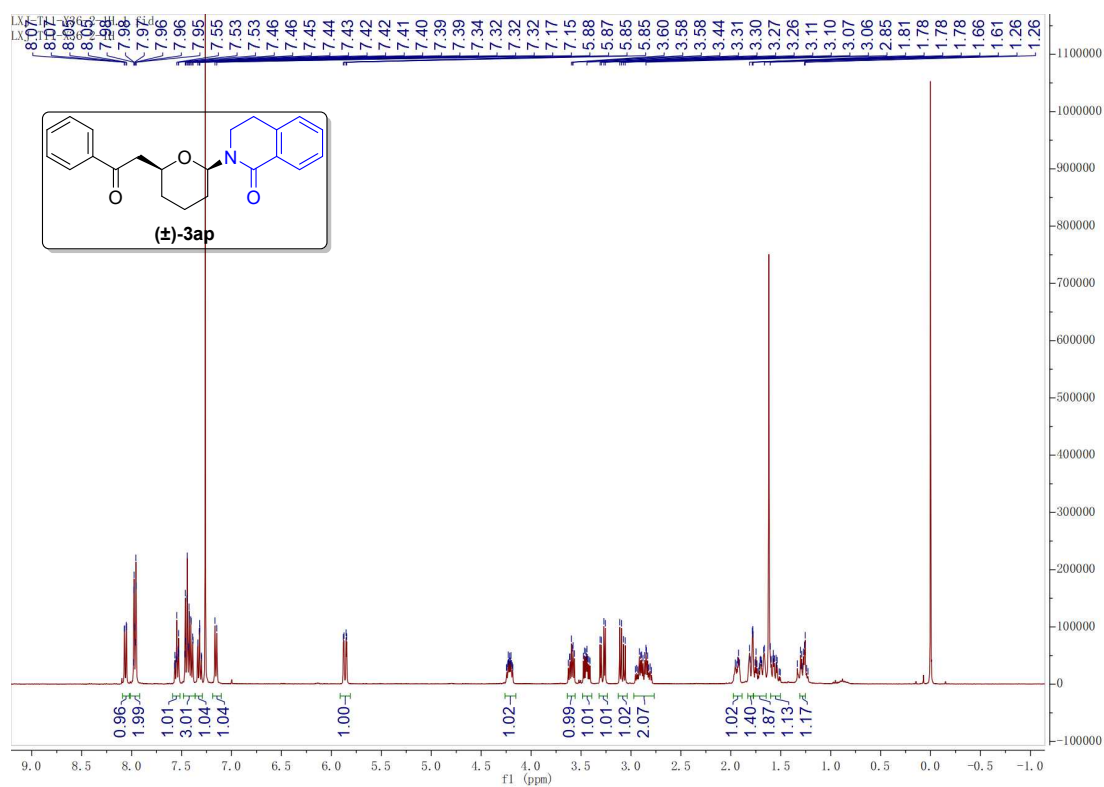

### The <sup>13</sup>C NMR spectrum of (±)-3ap (101 MHz, CDCl<sub>3</sub>)

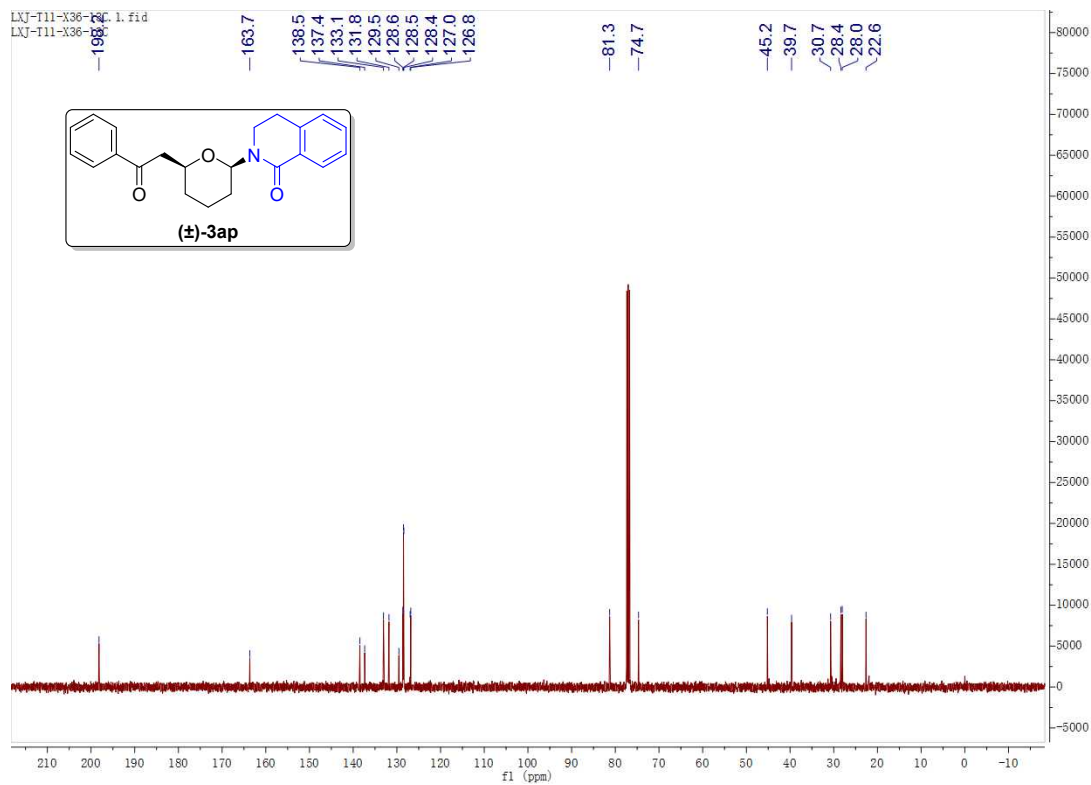

### The <sup>1</sup>H NMR spectrum of 3aq (400 MHz, CDCl<sub>3</sub>)

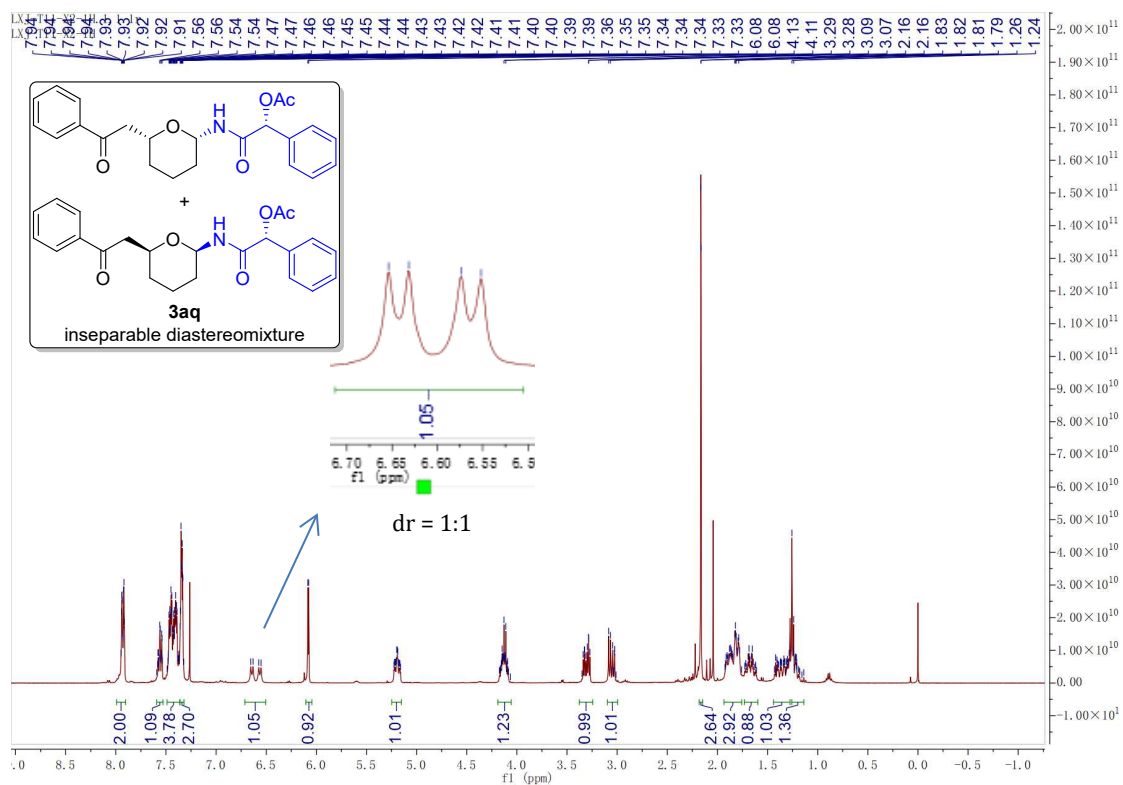

### The <sup>13</sup>C NMR spectrum of 3aq (101 MHz, CDCl<sub>3</sub>)

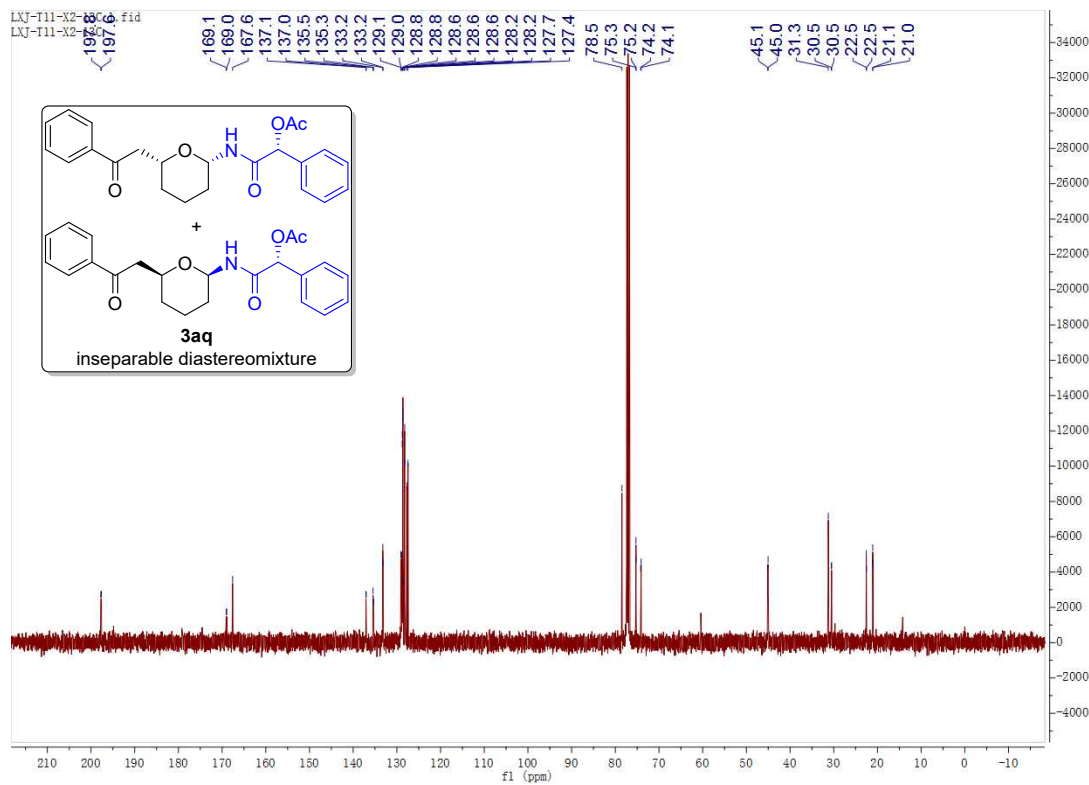



### The <sup>1</sup>H NMR spectrum of 3ar (400 MHz, CDCl<sub>3</sub>)

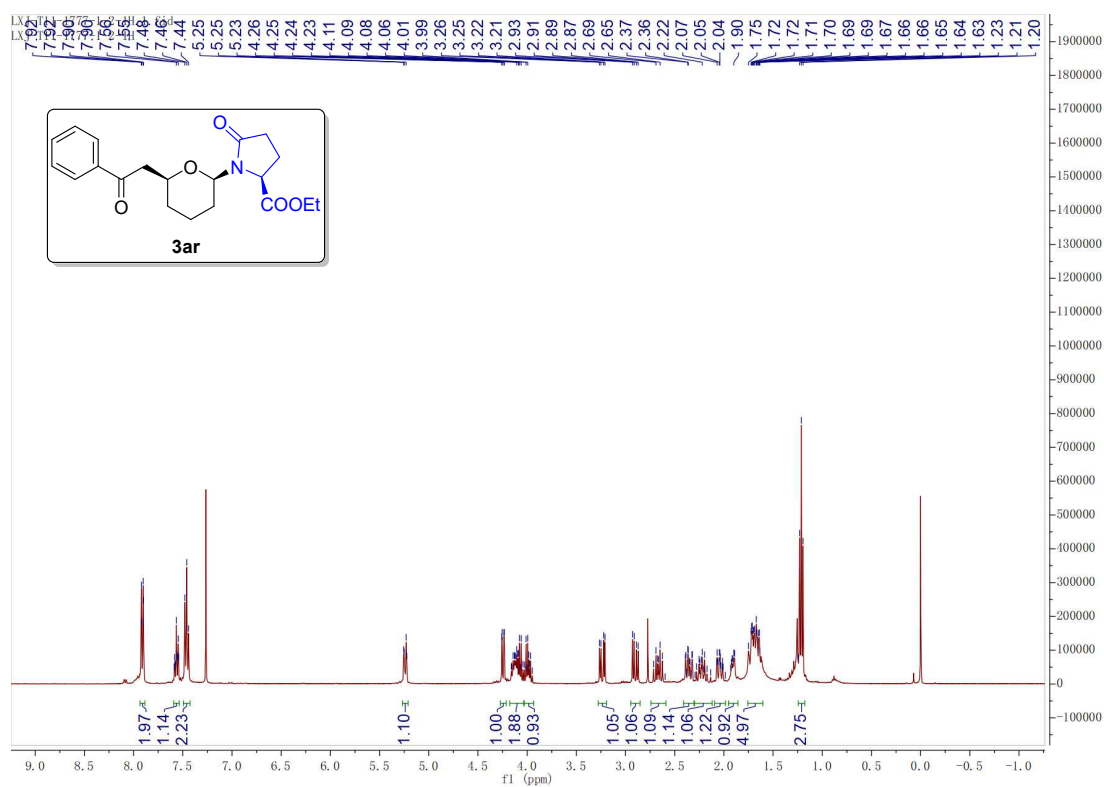

### The <sup>13</sup>C NMR spectrum of 3ar (101 MHz, CDCl<sub>3</sub>)

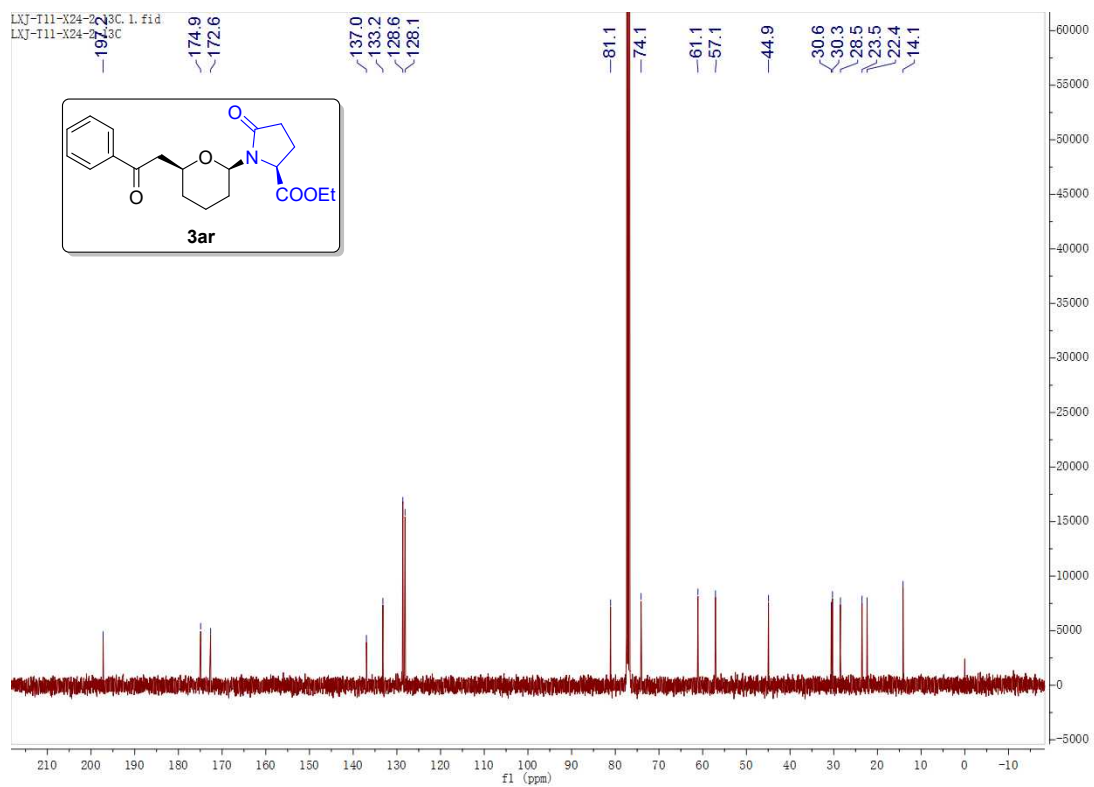

## The NOESY spectrum of 3ar (400 MHz, CDCl<sub>3</sub>)

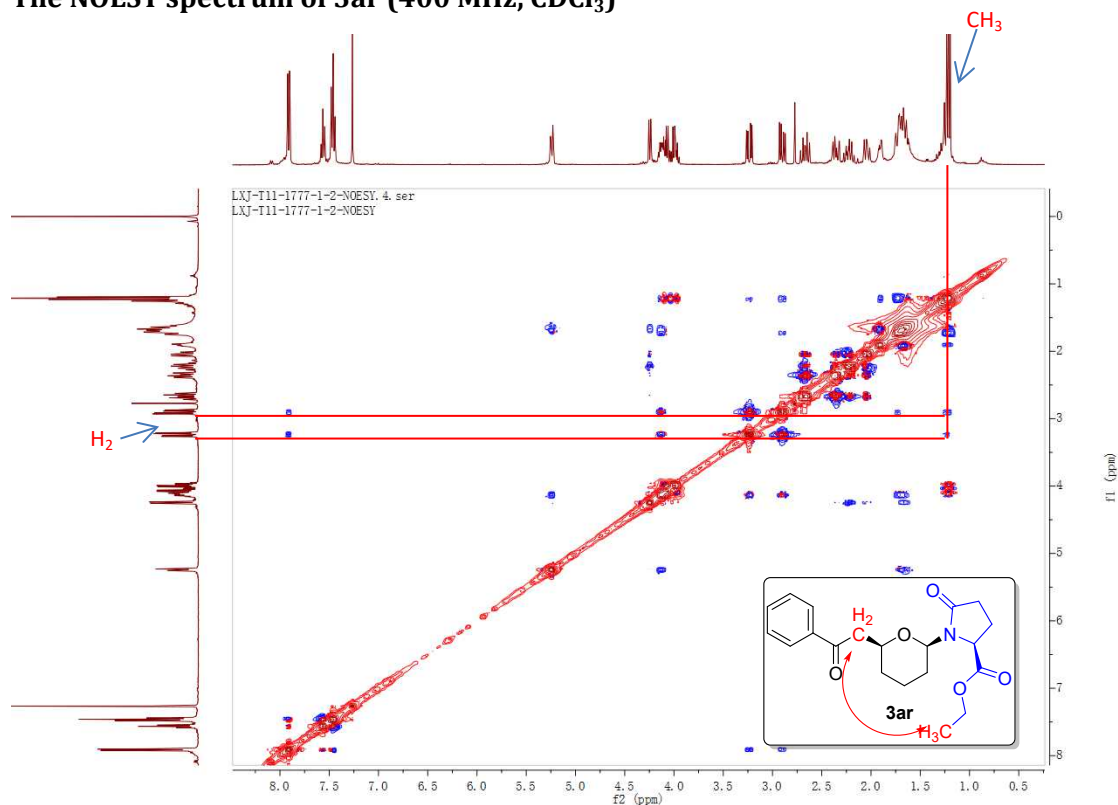

## The HPLC of racemic 3ar

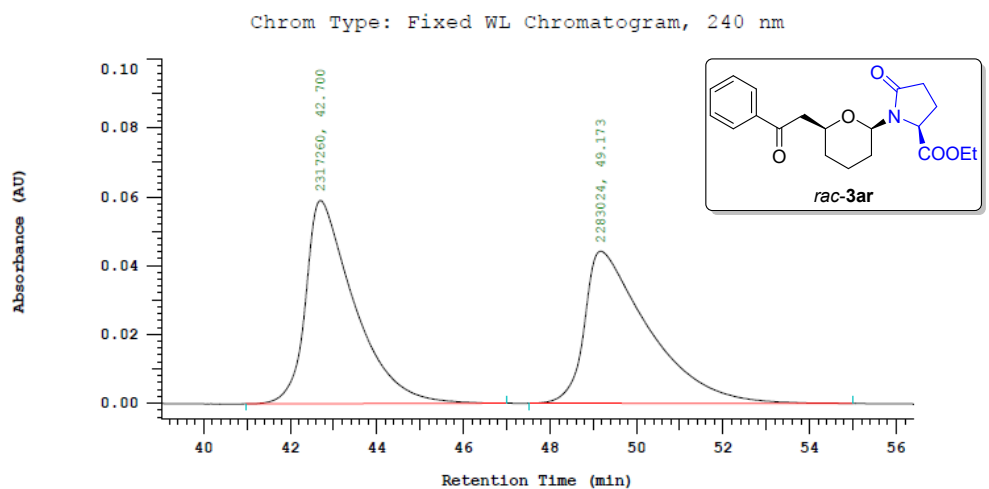

Chrom Type: Fixed WL Chromatogram, 240 nm  
Peak Quantitation: AREA  
Calculation Method: AREA%

| No. | RT     | Area    | Area %  | BC |
|-----|--------|---------|---------|----|
| 1   | 42.700 | 2317260 | 50.372  | BB |
| 2   | 49.173 | 2283024 | 49.628  | BB |
|     |        | 4600284 | 100.000 |    |

## The HPLC of chiral 3ar

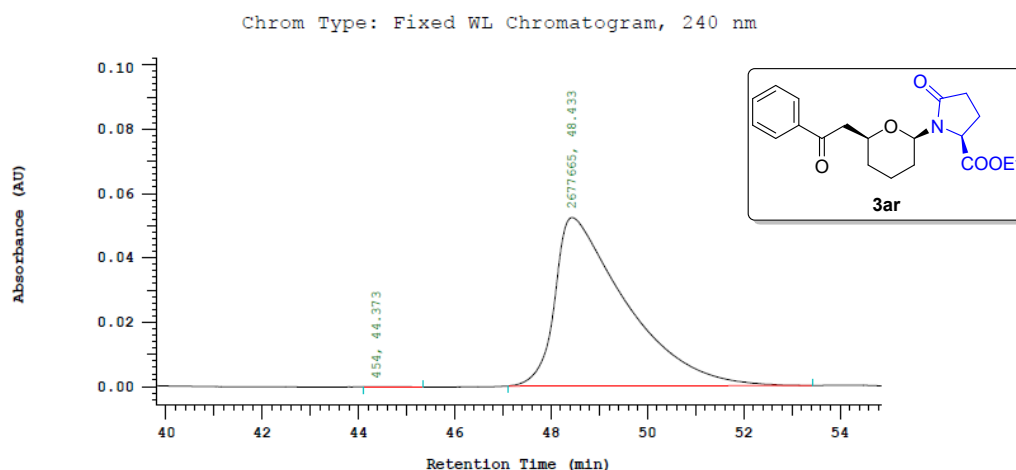

Chrom Type: Fixed WL Chromatogram, 240 nm  
 Peak Quantitation: AREA  
 Calculation Method: AREA%

| No. | RT     | Area    | Area %  | BC |
|-----|--------|---------|---------|----|
| 1   | 44.373 | 454     | 0.017   | BB |
| 2   | 48.433 | 2677665 | 99.983  | BB |
|     |        | 2678119 | 100.000 |    |

## The <sup>1</sup>H NMR spectrum of 3ar' (400 MHz, CDCl<sub>3</sub>)

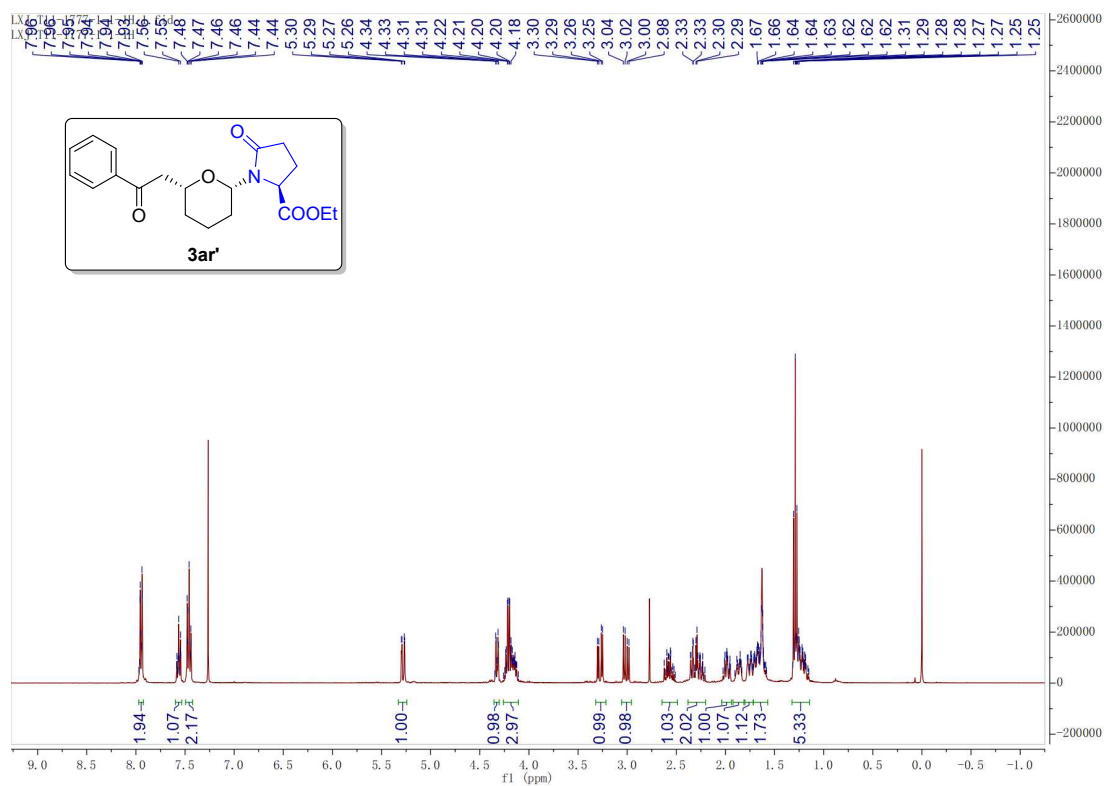

### The <sup>13</sup>C NMR spectrum of 3ar' (101 MHz, CDCl<sub>3</sub>)

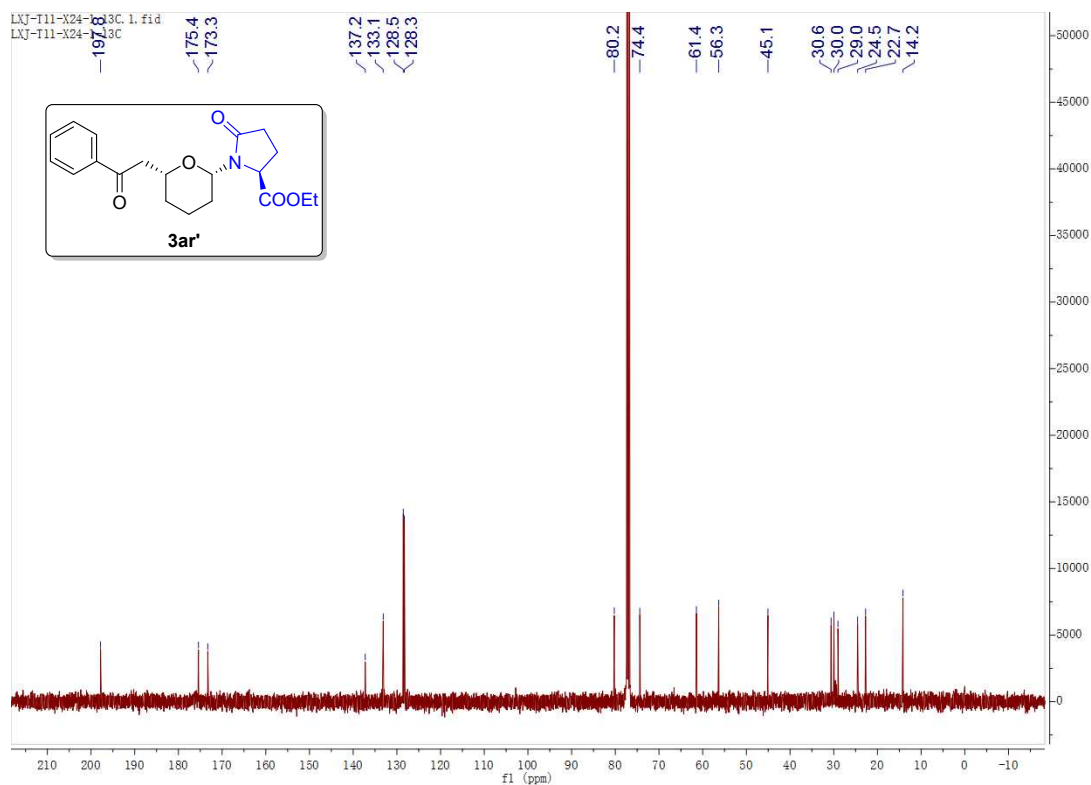

### The HPLC of racemic 3ar'

Chrom Type: Fixed WL Chromatogram, 240 nm

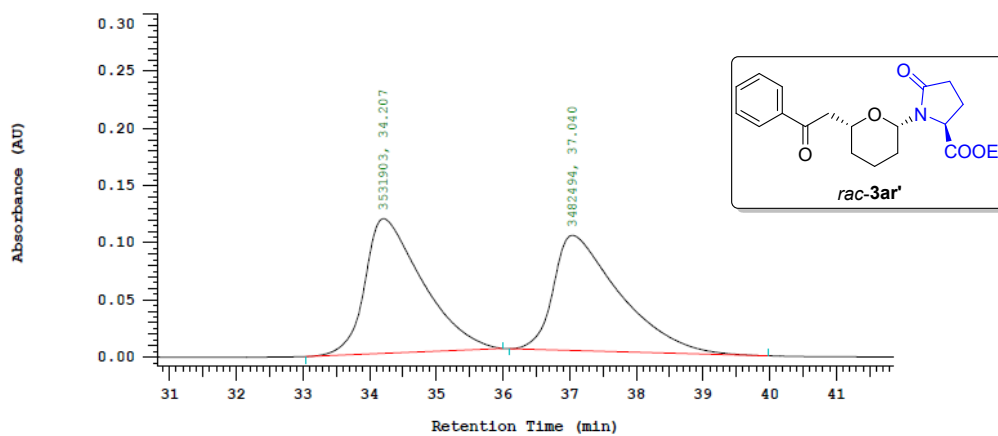

Chrom Type: Fixed WL Chromatogram, 240 nm

Peak Quantitation: AREA  
Calculation Method: AREA%

| No. | RT     | Area    | Area %  | BC |
|-----|--------|---------|---------|----|
| 1   | 34.207 | 3531903 | 50.352  | BB |
| 2   | 37.040 | 3482494 | 49.648  | BB |
|     |        | 7014397 | 100.000 |    |

## The HPLC of chiral 3ar'

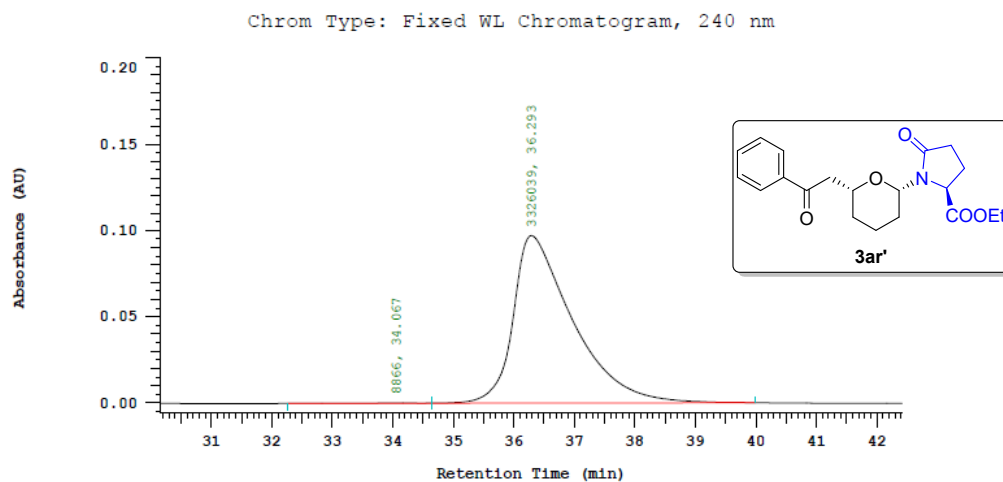

Chrom Type: Fixed WL Chromatogram, 240 nm

Peak Quantitation: AREA

Calculation Method: AREA%

| No. | RT     | Area    | Area %  | BC |
|-----|--------|---------|---------|----|
| 1   | 34.067 | 8866    | 0.266   | BV |
| 2   | 36.293 | 3326039 | 99.734  | VB |
|     |        | 3334905 | 100.000 |    |

## The <sup>1</sup>H NMR spectrum of 3as(400 MHz, CDCl<sub>3</sub>)

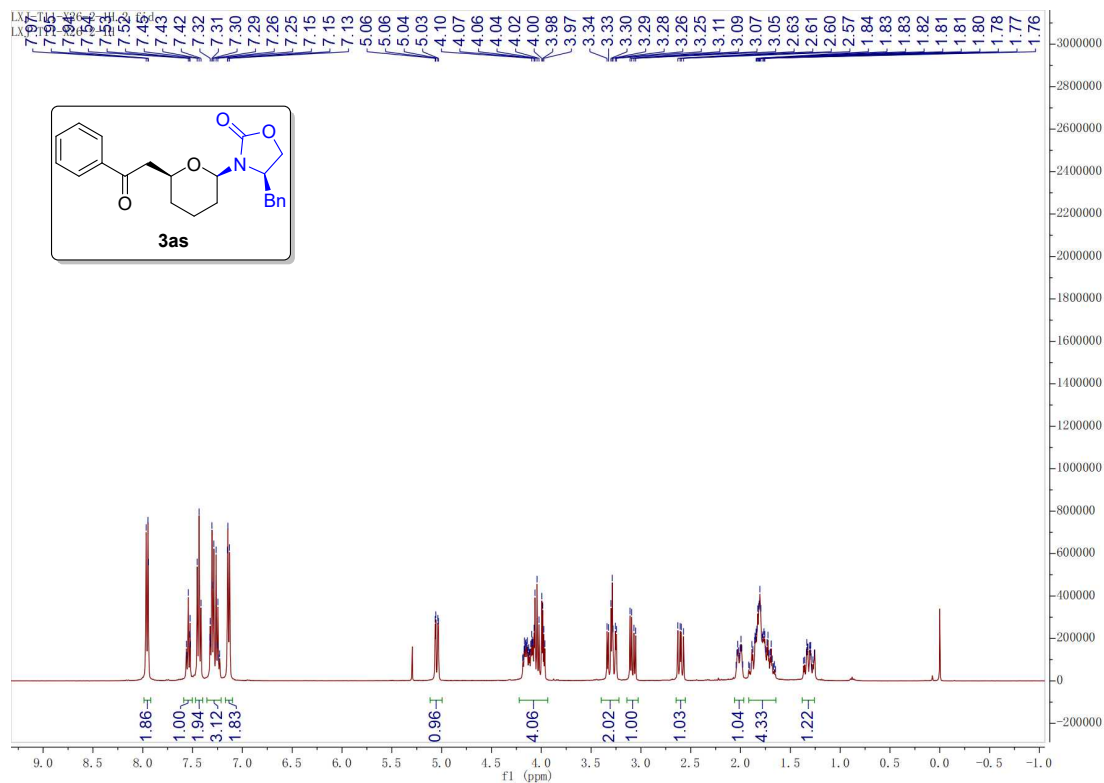

### The <sup>13</sup>C NMR spectrum of 3as (101 MHz, CDCl<sub>3</sub>)

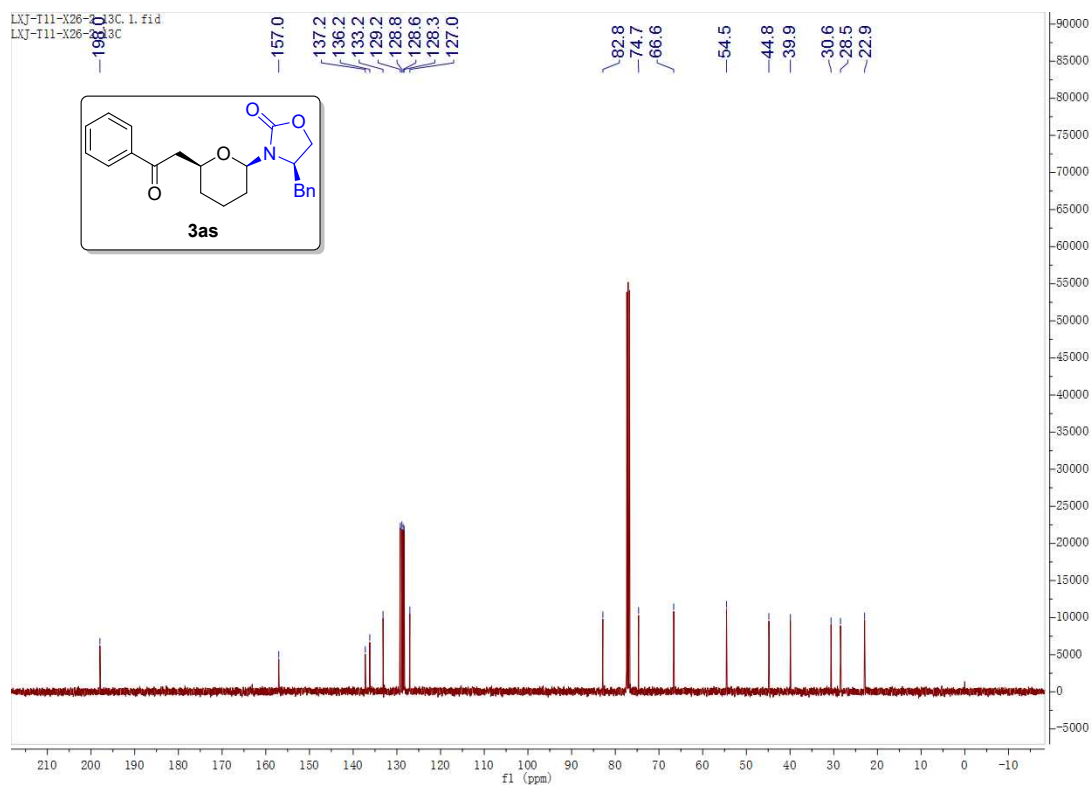

### The HPLC of racemic 3as

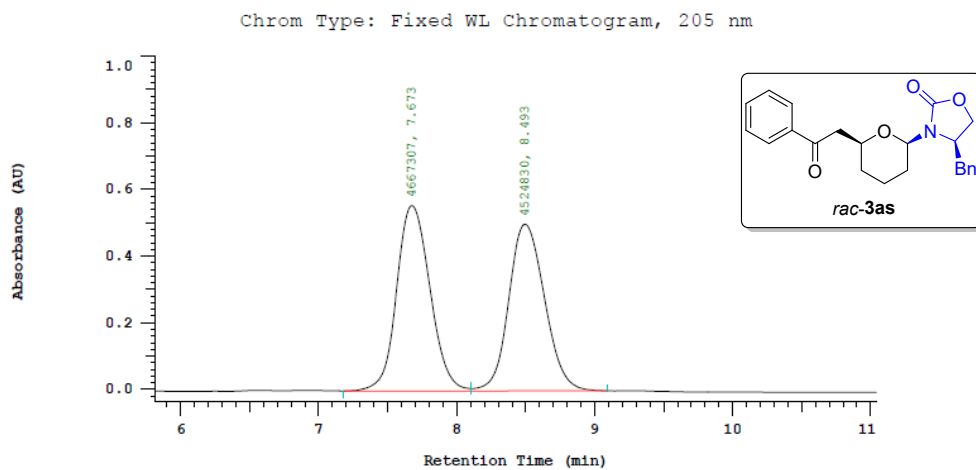

Chrom Type: Fixed WL Chromatogram, 205 nm  
Peak Quantitation: AREA  
Calculation Method: AREA%

| No. | RT    | Area    | Area %  | BC |
|-----|-------|---------|---------|----|
| 1   | 7.673 | 4667307 | 50.775  | EV |
| 2   | 8.493 | 4524830 | 49.225  | VB |
|     |       | 9192137 | 100.000 |    |

## The HPLC of chiral 3as

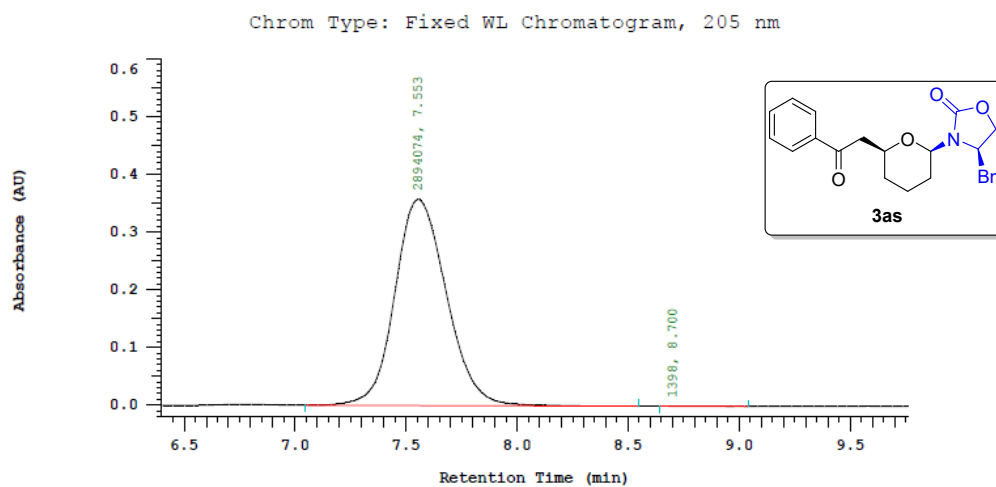

Chrom Type: Fixed WL Chromatogram, 205 nm  
 Peak Quantitation: AREA  
 Calculation Method: AREA%

| No. | RT    | Area    | Area %  | BC |
|-----|-------|---------|---------|----|
| 1   | 7.553 | 2894074 | 99.952  | BB |
| 2   | 8.700 | 1398    | 0.048   | BB |
|     |       | 2895472 | 100.000 |    |

## The HPLC of racemic 3af

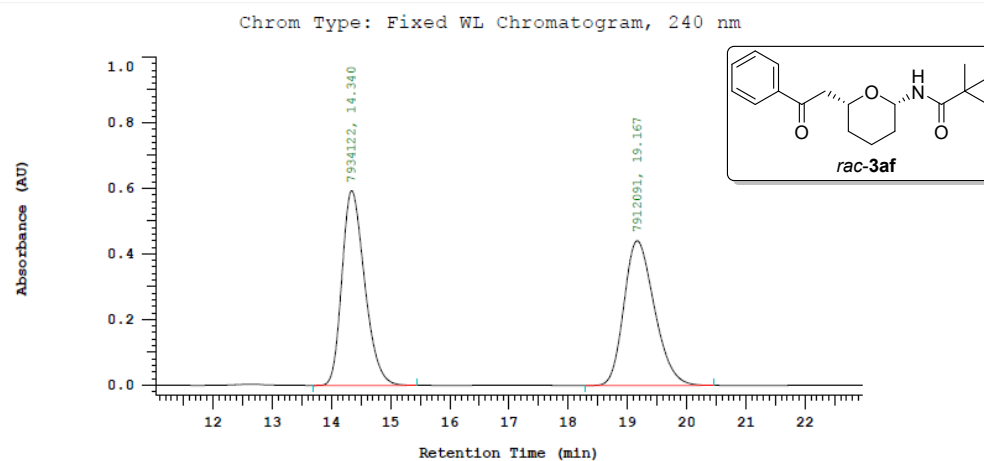

Chrom Type: Fixed WL Chromatogram, 240 nm  
 Peak Quantitation: AREA  
 Calculation Method: AREA%

| No. | RT     | Area     | Area %  | BC |
|-----|--------|----------|---------|----|
| 1   | 14.340 | 7934122  | 50.070  | BB |
| 2   | 19.167 | 7912091  | 49.930  | BB |
|     |        | 15846213 | 100.000 |    |

## The HPLC of chiral 3af

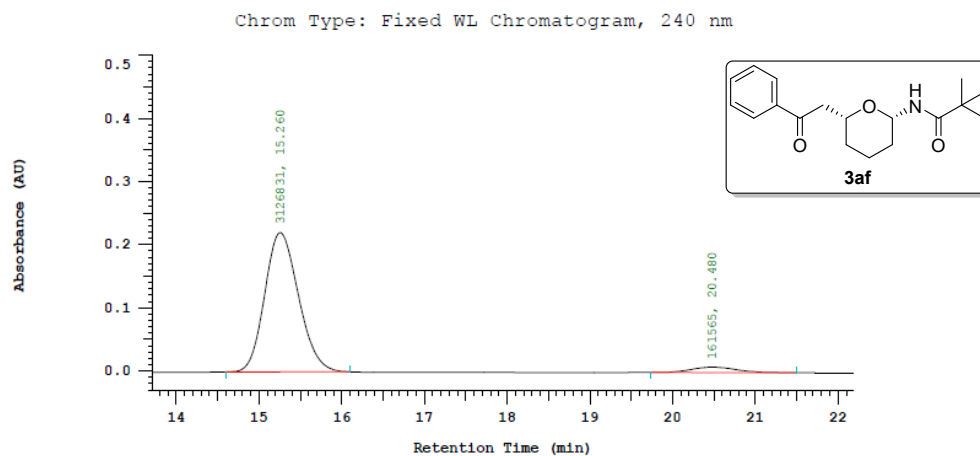

Chrom Type: Fixed WL Chromatogram, 240 nm  
 Peak Quantitation: AREA  
 Calculation Method: AREA%

| No. | RT     | Area    | Area %  | BC |
|-----|--------|---------|---------|----|
| 1   | 15.260 | 3126831 | 95.087  | BB |
| 2   | 20.480 | 161565  | 4.913   | BB |
|     |        | 3288396 | 100.000 |    |

## The <sup>1</sup>H NMR spectrum of 3bf (400 MHz, CDCl<sub>3</sub>)

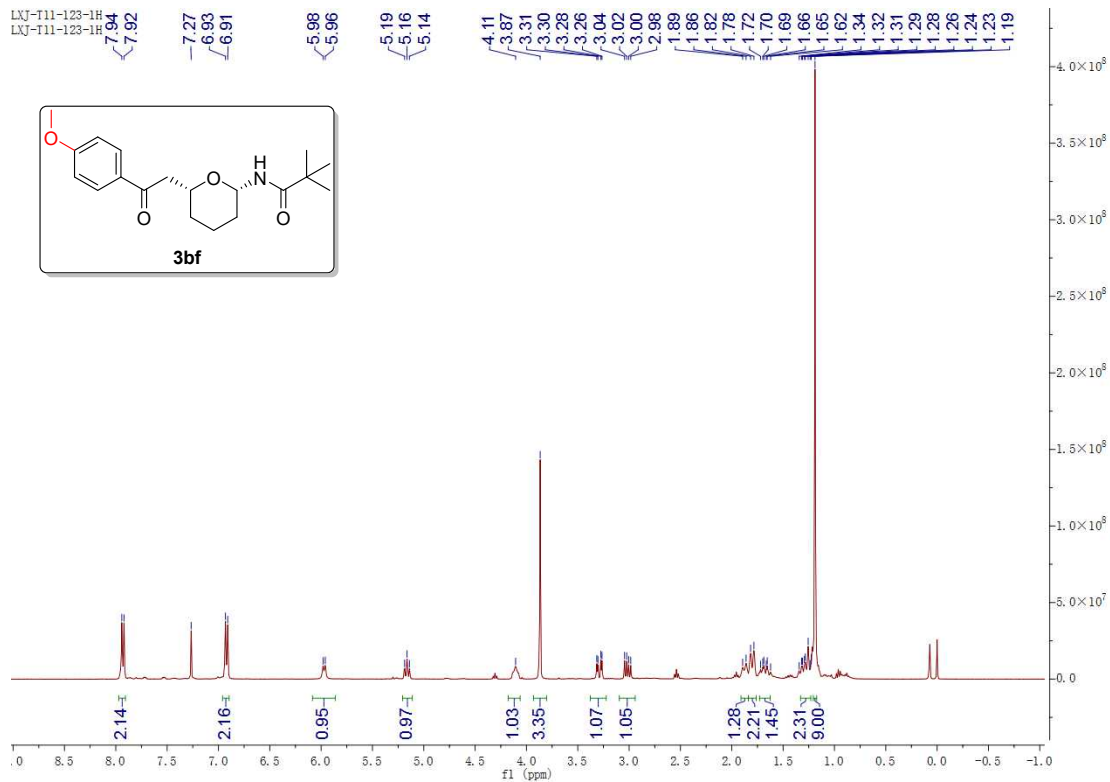



### The <sup>13</sup>C NMR spectrum of 3bf (101 MHz, CDCl<sub>3</sub>)

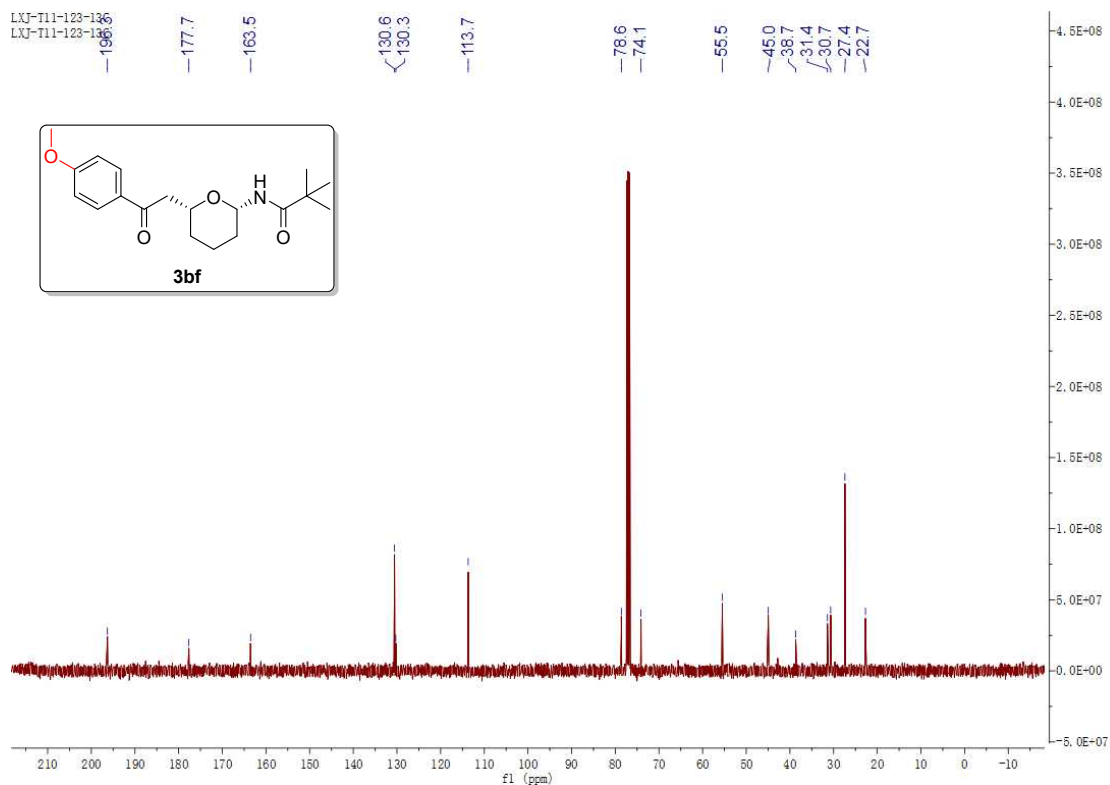

### The HPLC of racemic 3bf

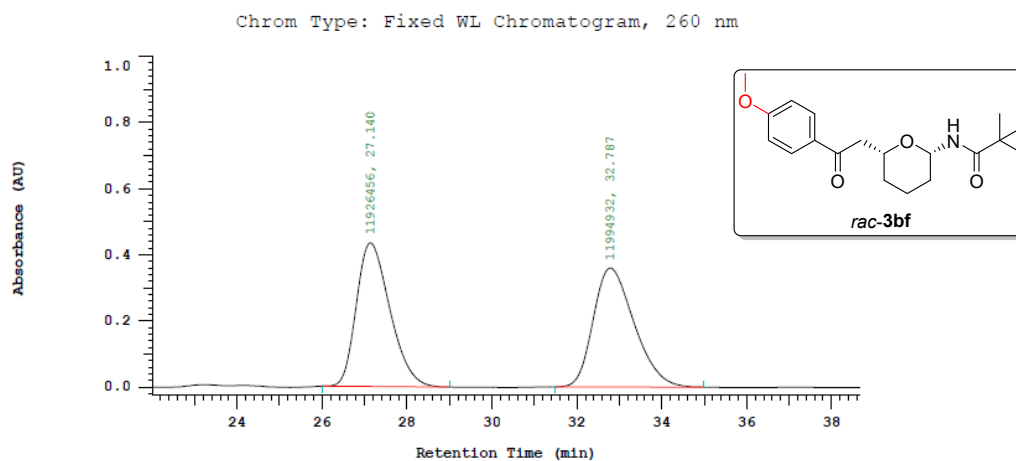

Chrom Type: Fixed WL Chromatogram, 260 nm

Peak Quantitation: AREA  
Calculation Method: AREA%

| No. | RT     | Area     | Area %  | BC |
|-----|--------|----------|---------|----|
| 1   | 27.140 | 11926456 | 49.857  | BB |
| 2   | 32.787 | 11994932 | 50.143  | BB |
|     |        | 23921388 | 100.000 |    |

## The HPLC of chiral 3bf

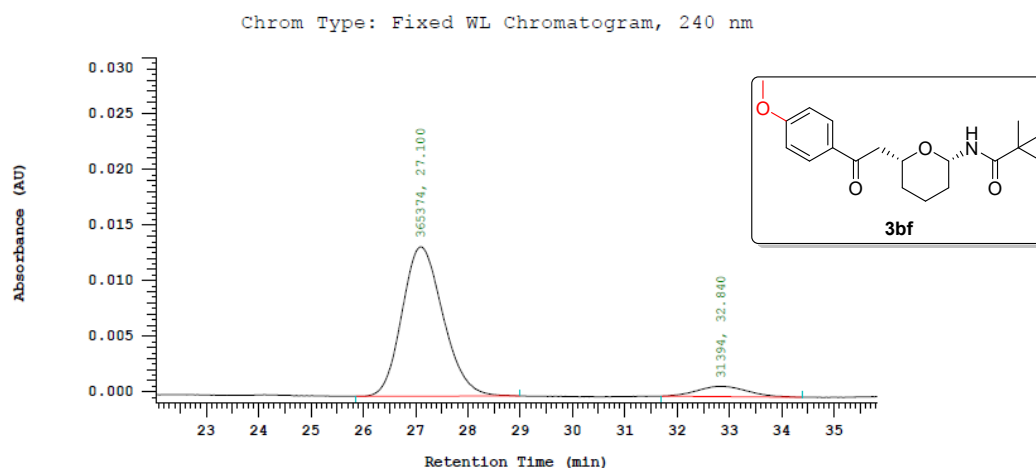

Chrom Type: Fixed WL Chromatogram, 240 nm  
 Peak Quantitation: AREA  
 Calculation Method: AREA%

| No. | RT     | Area   | Area %  | BC |
|-----|--------|--------|---------|----|
| 1   | 27.100 | 365374 | 92.088  | BB |
| 2   | 32.840 | 31394  | 7.912   | BB |
|     |        | 396768 | 100.000 |    |

## The <sup>1</sup>H NMR spectrum of 3cf (400 MHz, CDCl<sub>3</sub>)

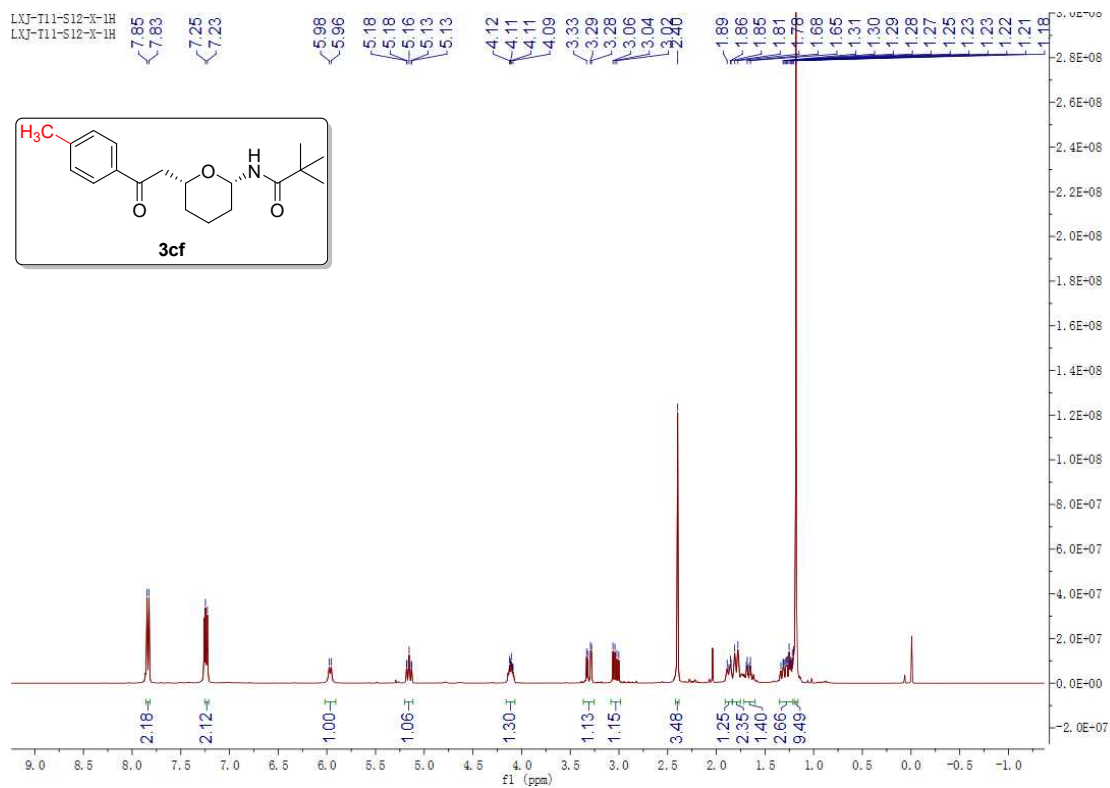

## The <sup>13</sup>C NMR spectrum of 3cf (125 MHz, CDCl<sub>3</sub>)

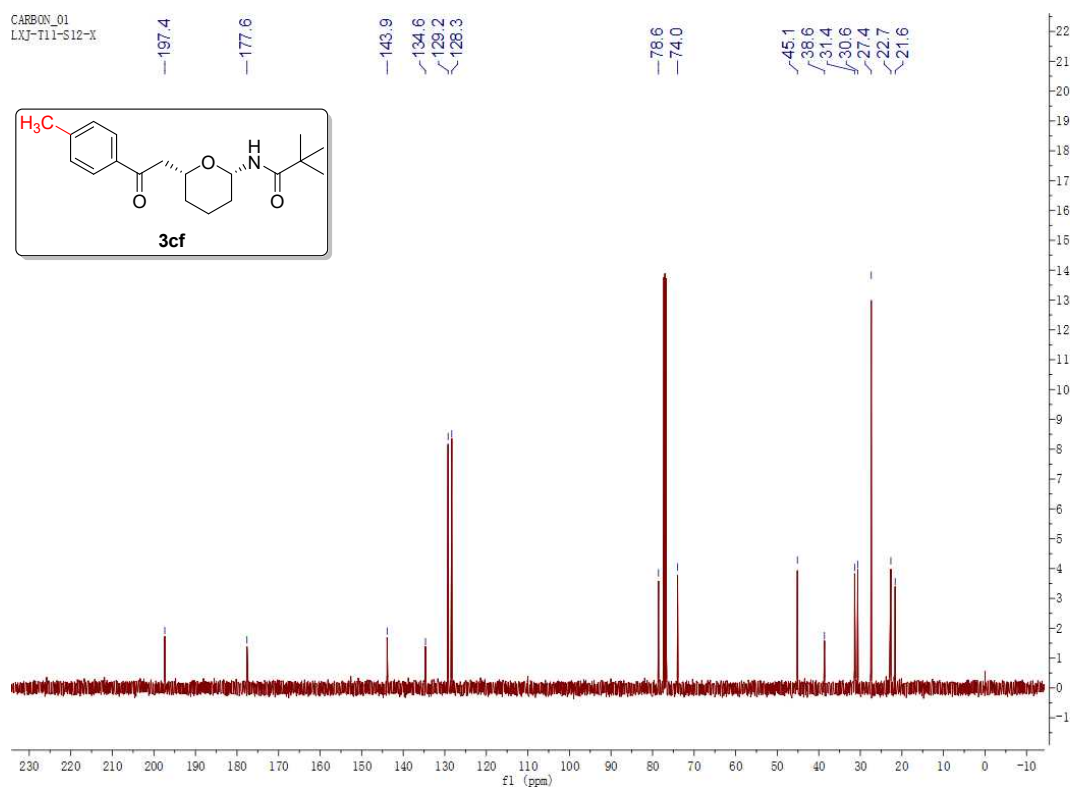

## The HPLC of racemic 3cf

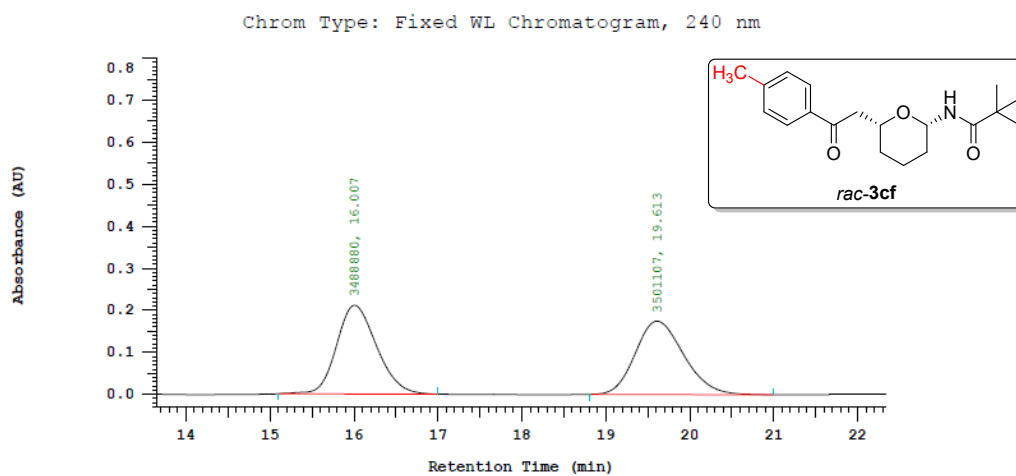

Chrom Type: Fixed WL Chromatogram, 240 nm  
 Peak Quantitation: AREA  
 Calculation Method: AREA%

| No. | RT     | Area    | Area %  | BC |
|-----|--------|---------|---------|----|
| 1   | 16.007 | 3488880 | 49.913  | BB |
| 2   | 19.613 | 3501107 | 50.087  | BB |
|     |        | 6989987 | 100.000 |    |

## The HPLC of chiral 3cf

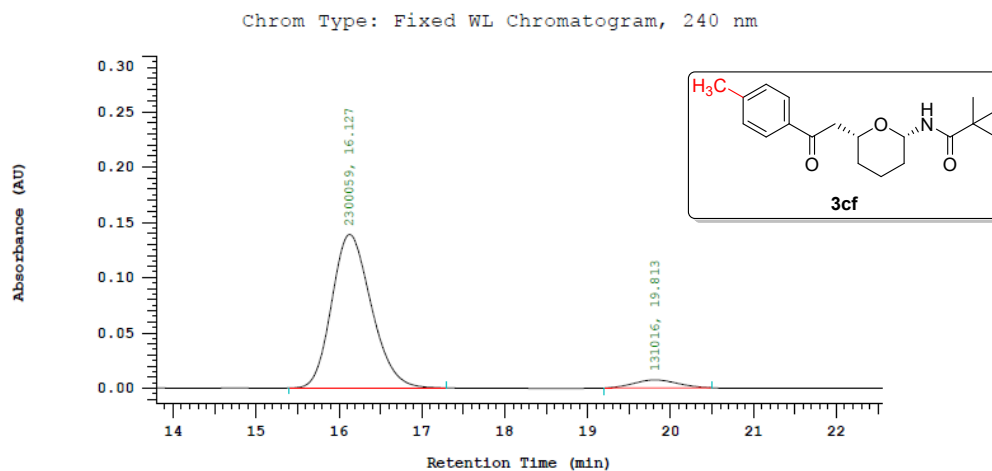

Chrom Type: Fixed WL Chromatogram, 240 nm

Peak Quantitation: AREA

Calculation Method: AREA%

| No. | RT     | Area    | Area %  | BC |
|-----|--------|---------|---------|----|
| 1   | 16.127 | 2300059 | 94.611  | BB |
| 2   | 19.813 | 131016  | 5.389   | BB |
|     |        | 2431075 | 100.000 |    |

## The <sup>1</sup>H NMR spectrum of 3df (400 MHz, CDCl<sub>3</sub>)

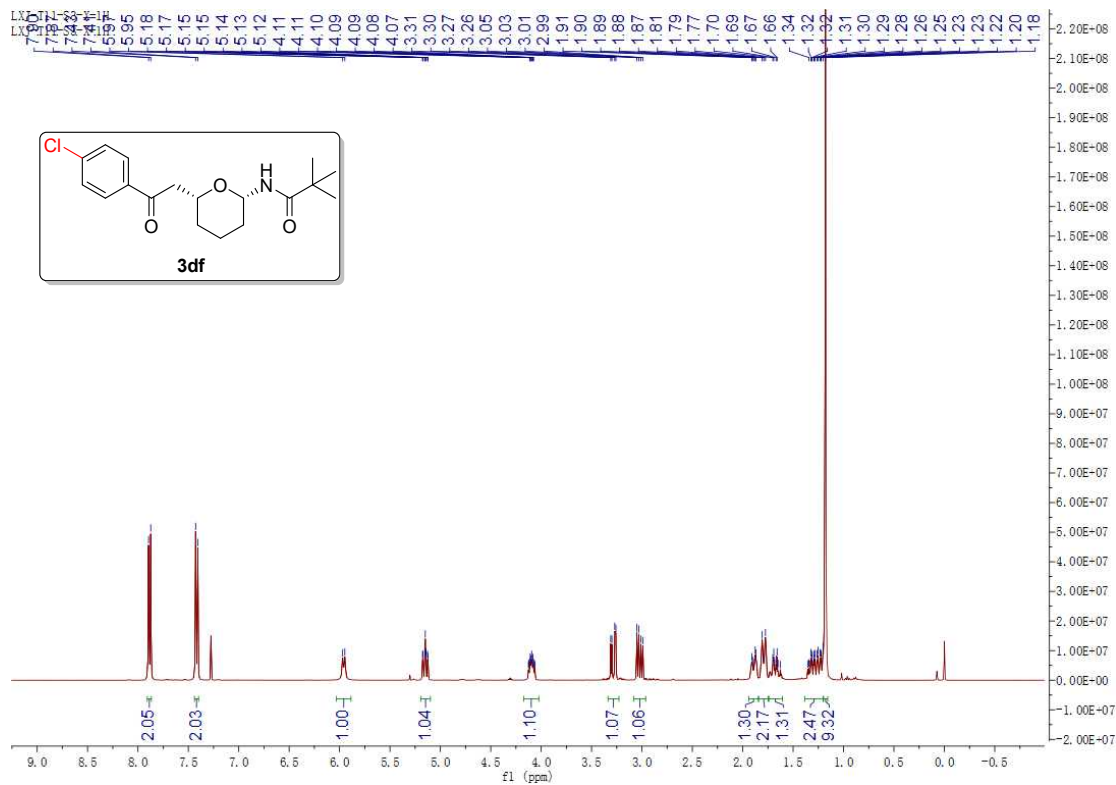

## The <sup>13</sup>C NMR spectrum of 3df (101 MHz, CDCl<sub>3</sub>)

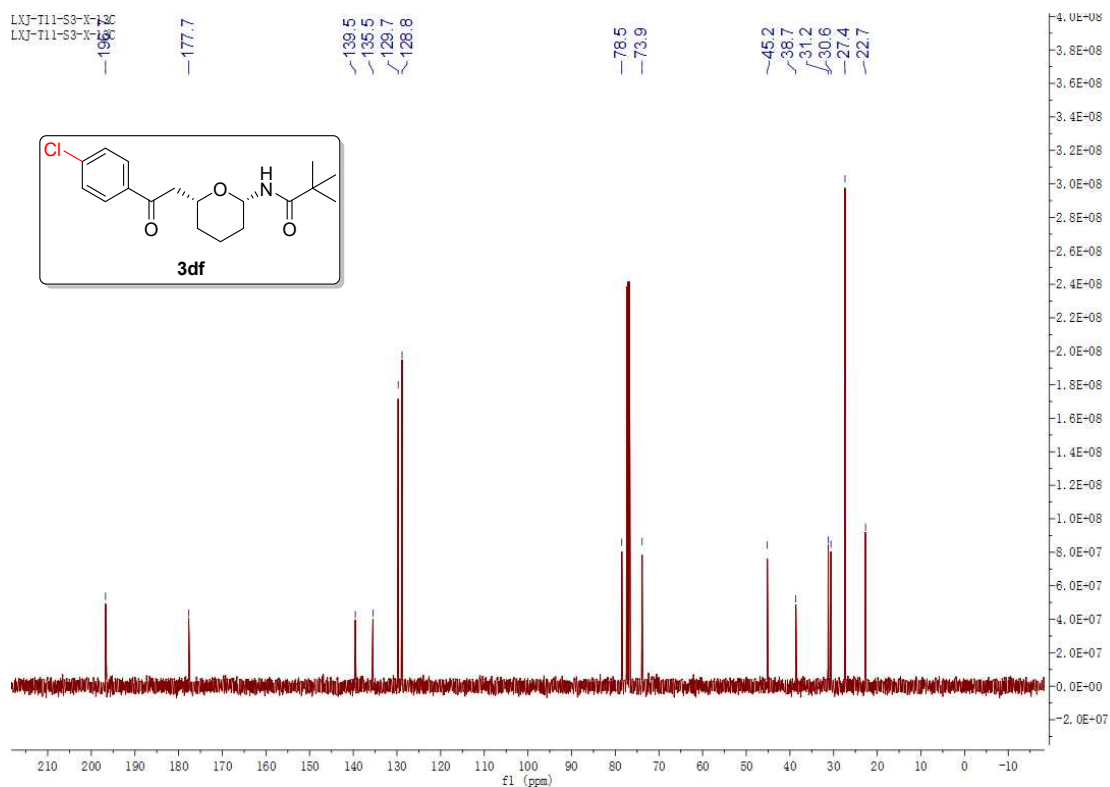

## The HPLC of racemic 3df

Chrom Type: Fixed WL Chromatogram, 240 nm

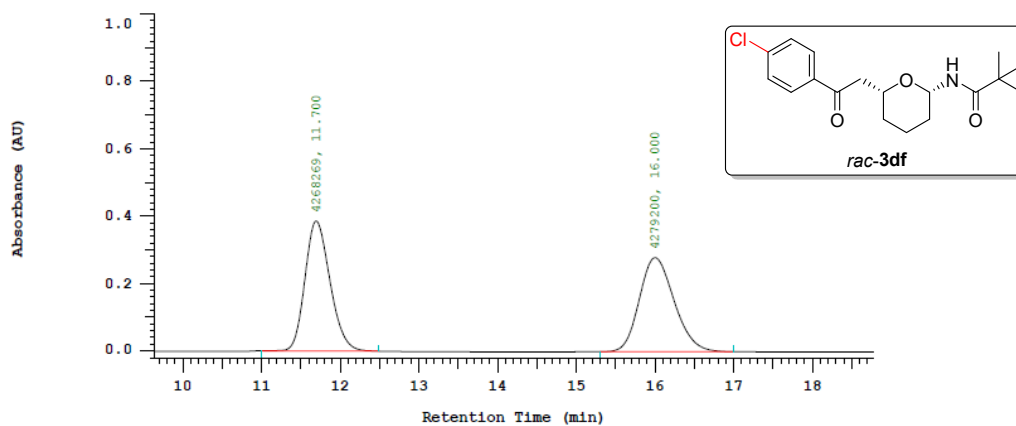

Chrom Type: Fixed WL Chromatogram, 240 nm

Peak Quantitation: AREA  
Calculation Method: AREA%

| No. | RT     | Area    | Area %  | BC |
|-----|--------|---------|---------|----|
| 1   | 11.700 | 4268269 | 49.936  | BB |
| 2   | 16.000 | 4279200 | 50.064  | BB |
|     |        | 8547469 | 100.000 |    |

## The HPLC of chiral 3df

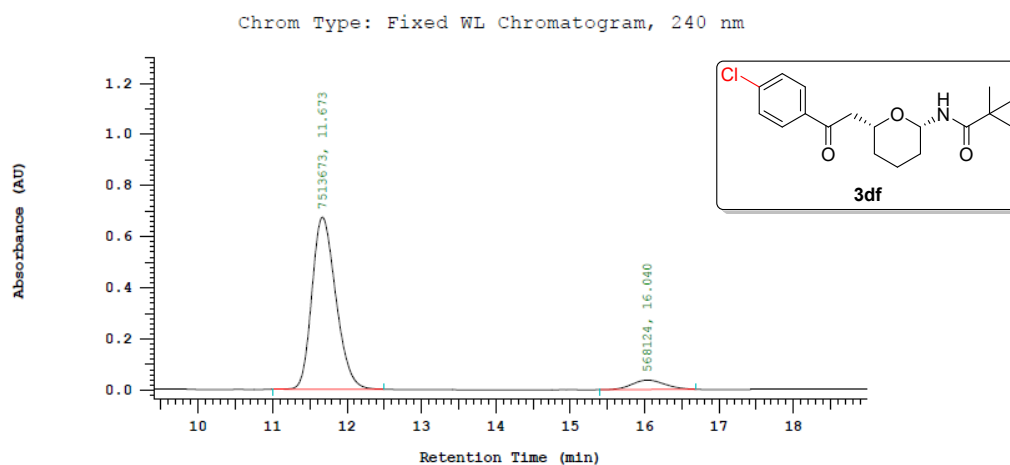

Chrom Type: Fixed WL Chromatogram, 240 nm  
Peak Quantitation: AREA  
Calculation Method: AREA%

| No. | RT     | Area    | Area %  | BC |
|-----|--------|---------|---------|----|
| 1   | 11.673 | 7513673 | 92.970  | BB |
| 2   | 16.040 | 568124  | 7.030   | BB |
|     |        | 8081797 | 100.000 |    |

## The <sup>1</sup>H NMR spectrum of 3ef (400 MHz, CDCl<sub>3</sub>)

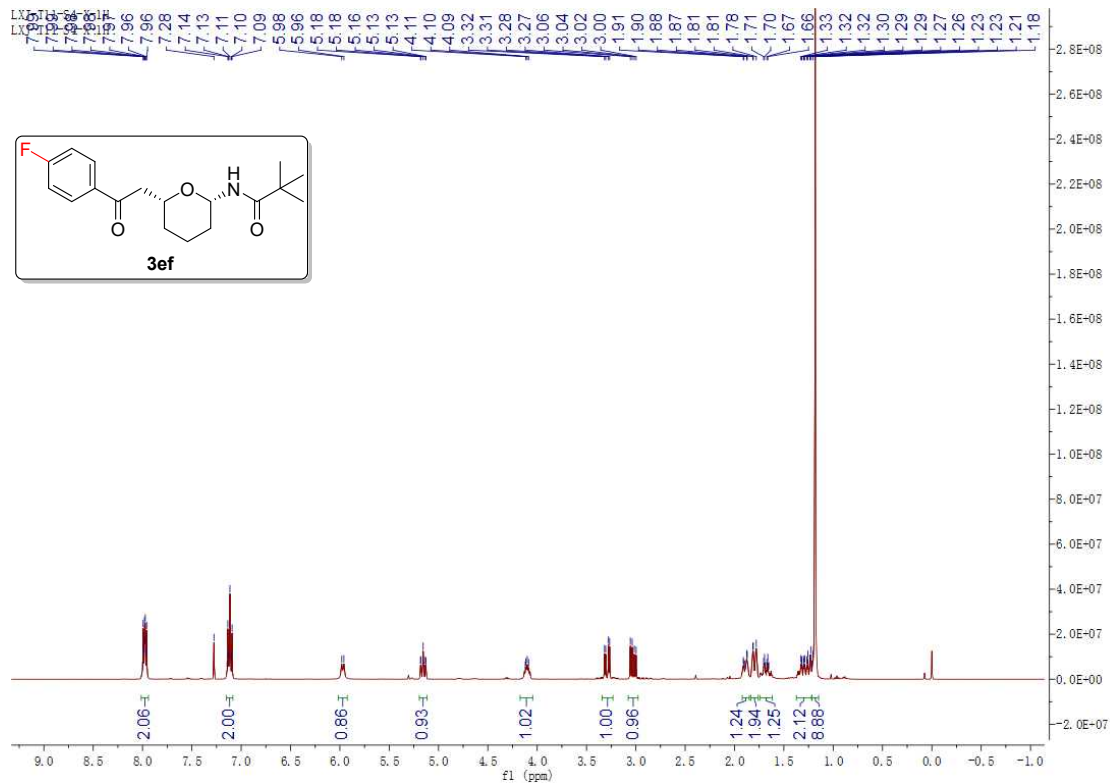

### The $^{13}\text{C}$ NMR spectrum of 3ef (101 MHz, $\text{CDCl}_3$ )

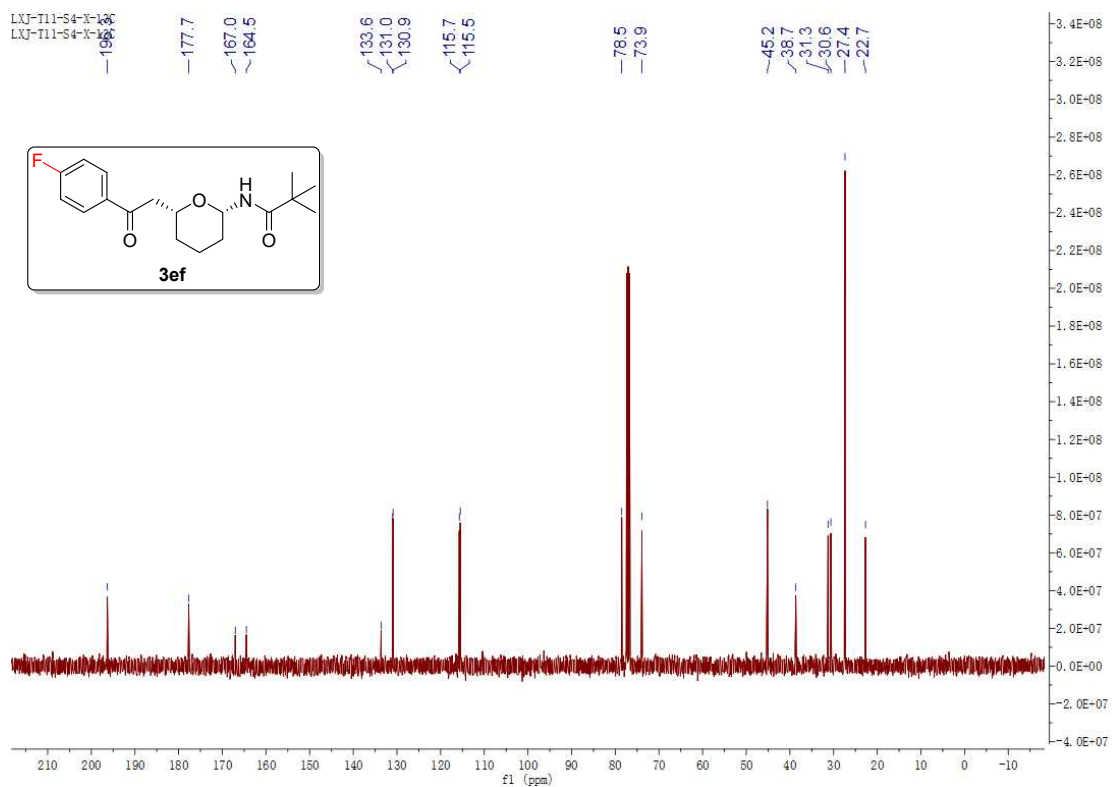

### The $^{19}\text{F}$ NMR spectrum of 3ef (376 MHz, $\text{CDCl}_3$ )

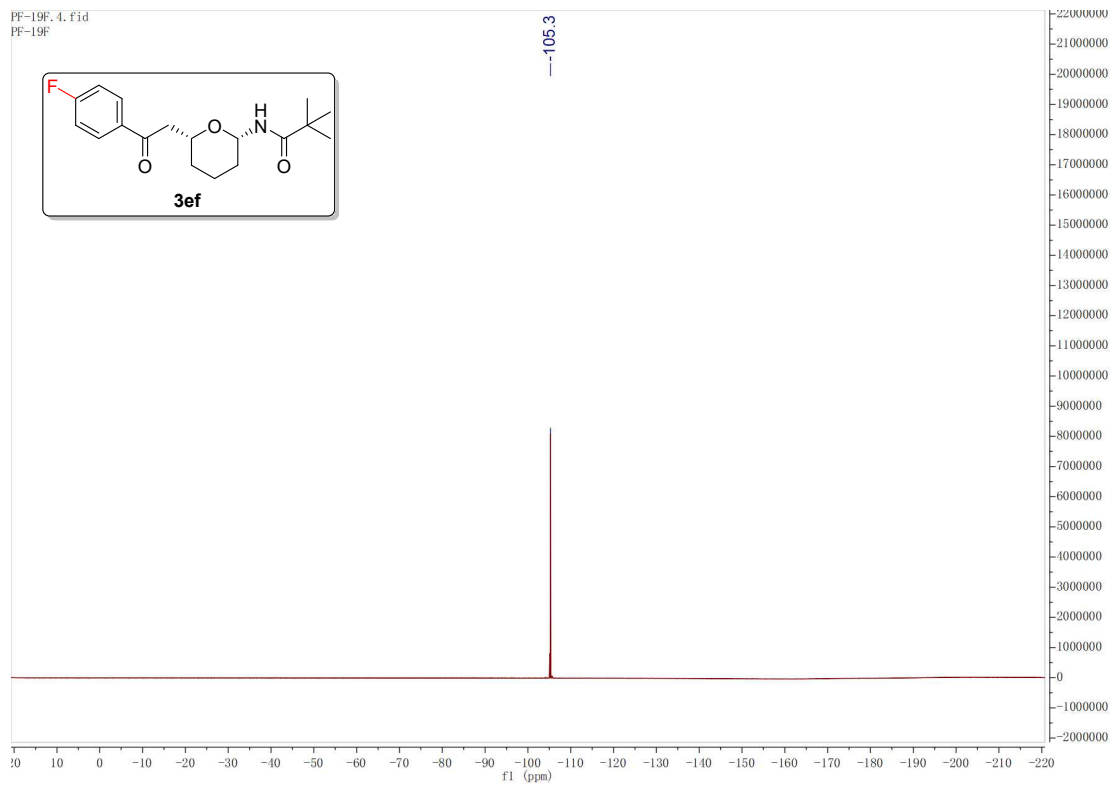

## The HPLC of racemic 3ef

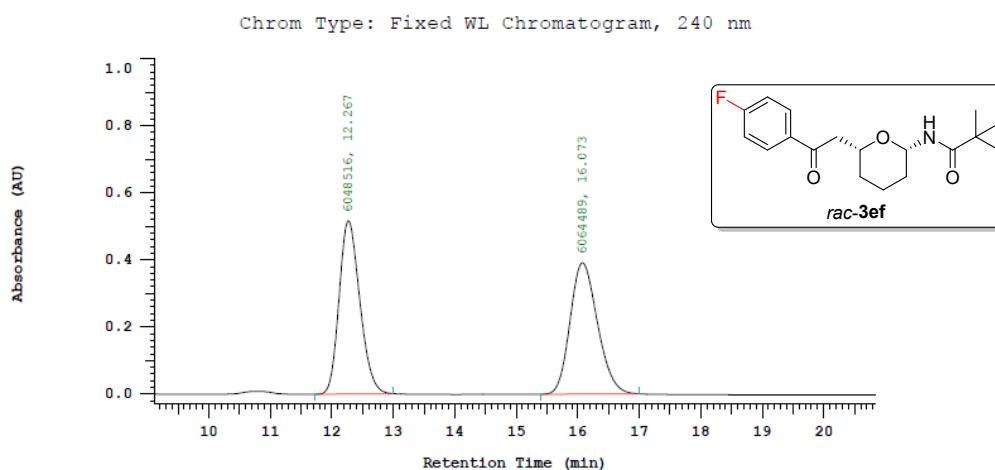

Chrom Type: Fixed WL Chromatogram, 240 nm  
Peak Quantitation: AREA  
Calculation Method: AREA%

| No. | RT     | Area     | Area %  | BC |
|-----|--------|----------|---------|----|
| 1   | 12.267 | 6048516  | 49.934  | BB |
| 2   | 16.073 | 6064489  | 50.066  | BB |
|     |        | 12113005 | 100.000 |    |

## The HPLC of chiral 3ef

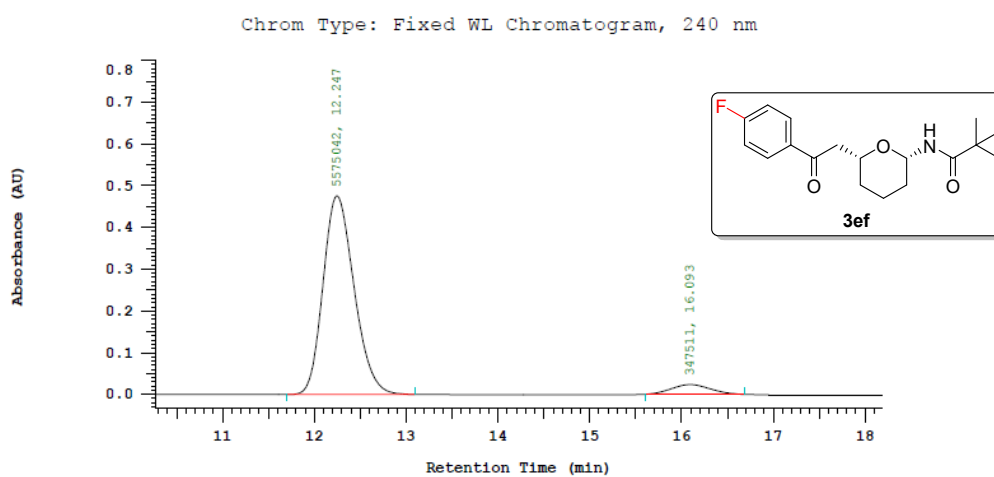

Chrom Type: Fixed WL Chromatogram, 240 nm  
Peak Quantitation: AREA  
Calculation Method: AREA%

| No. | RT     | Area    | Area %  | BC |
|-----|--------|---------|---------|----|
| 1   | 12.247 | 5575042 | 94.132  | BB |
| 2   | 16.093 | 347511  | 5.868   | BB |
|     |        | 5922553 | 100.000 |    |



### The <sup>1</sup>H NMR spectrum of 3ff (400 MHz, CDCl<sub>3</sub>)

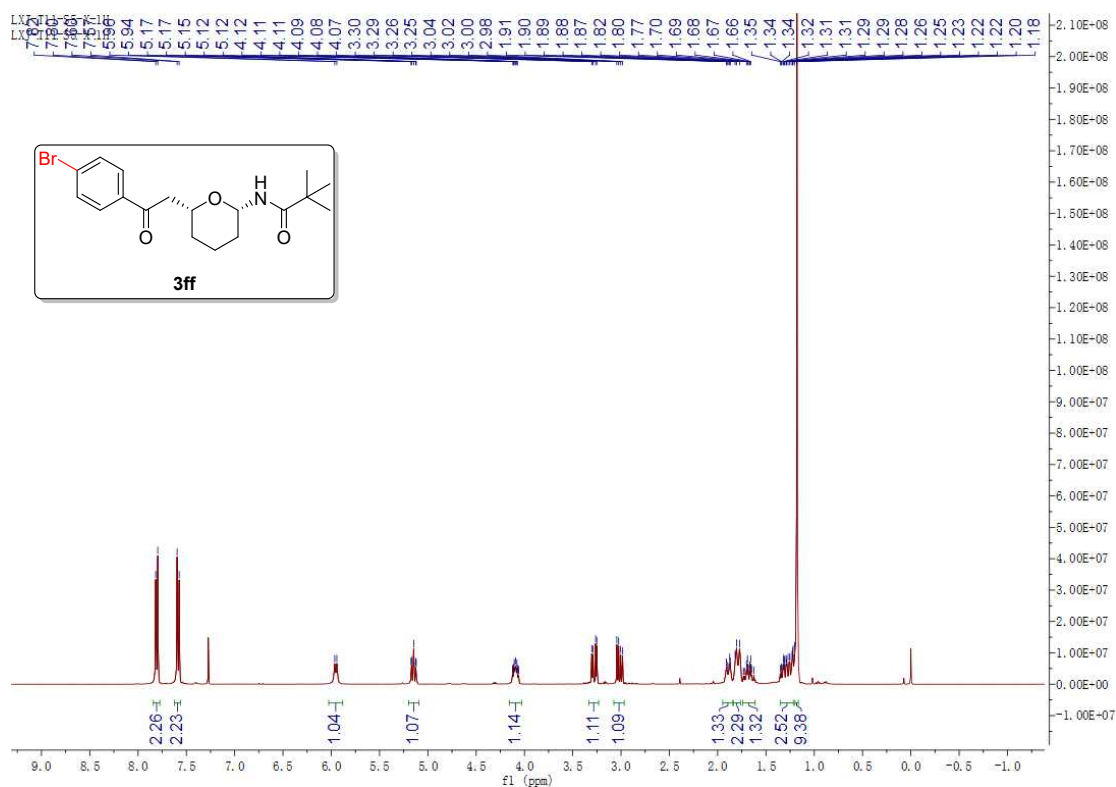

### The <sup>13</sup>C NMR spectrum of 3ff (101 MHz, CDCl<sub>3</sub>)

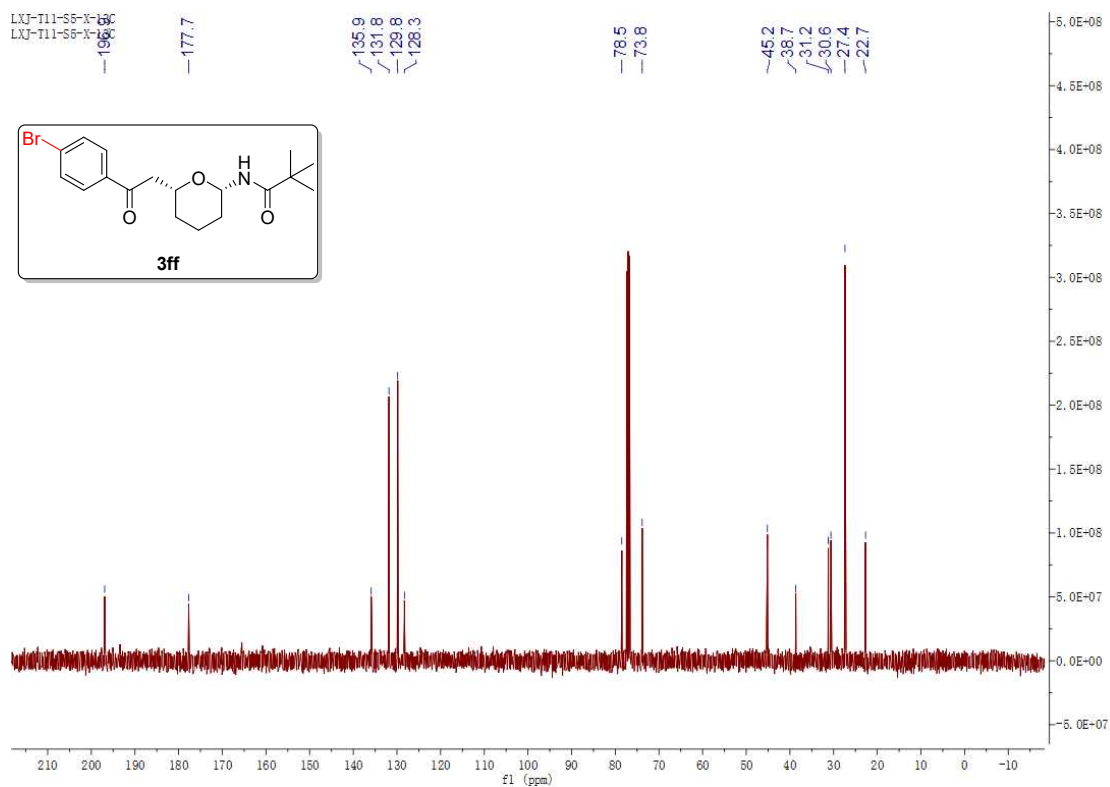

## The HPLC of racemic 3ff

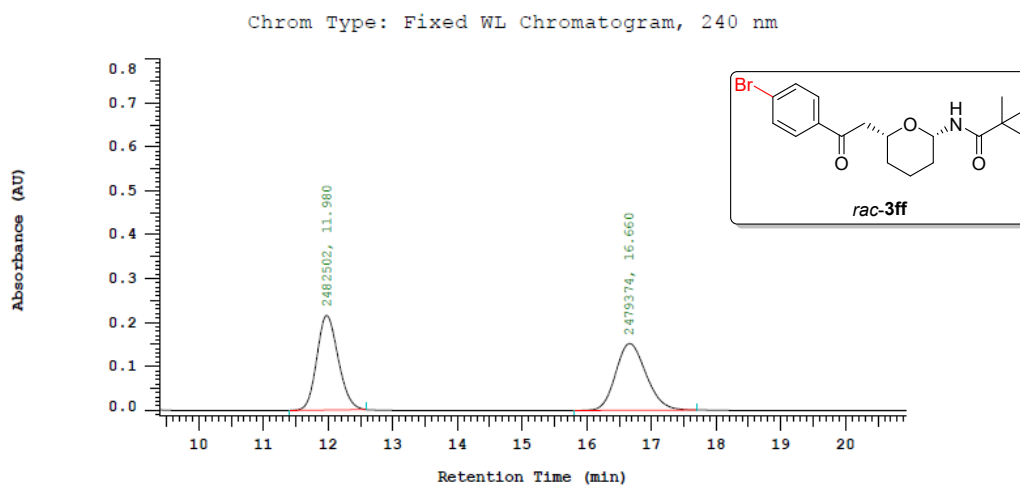

Chrom Type: Fixed WL Chromatogram, 240 nm  
 Peak Quantitation: AREA  
 Calculation Method: AREA%

| No. | RT     | Area    | Area %  | BC |
|-----|--------|---------|---------|----|
| 1   | 11.980 | 2482502 | 50.032  | BB |
| 2   | 16.660 | 2479374 | 49.968  | BB |
|     |        | 4961876 | 100.000 |    |

## The HPLC of chiral 3ff

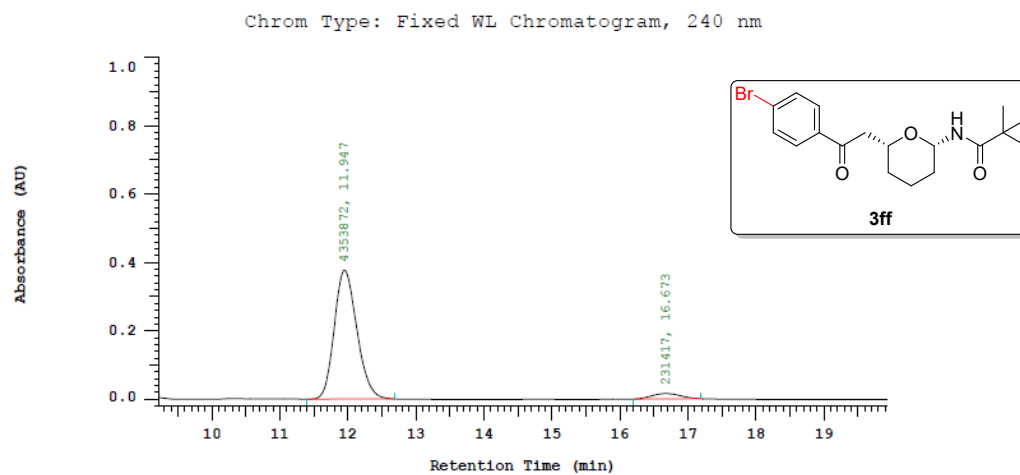

Chrom Type: Fixed WL Chromatogram, 240 nm  
 Peak Quantitation: AREA  
 Calculation Method: AREA%

| No. | RT     | Area    | Area %  | BC |
|-----|--------|---------|---------|----|
| 1   | 11.947 | 4353872 | 94.953  | BB |
| 2   | 16.673 | 231417  | 5.047   | BB |
|     |        | 4585289 | 100.000 |    |

### The <sup>1</sup>H NMR spectrum of 3gf (500 MHz, CDCl<sub>3</sub>)

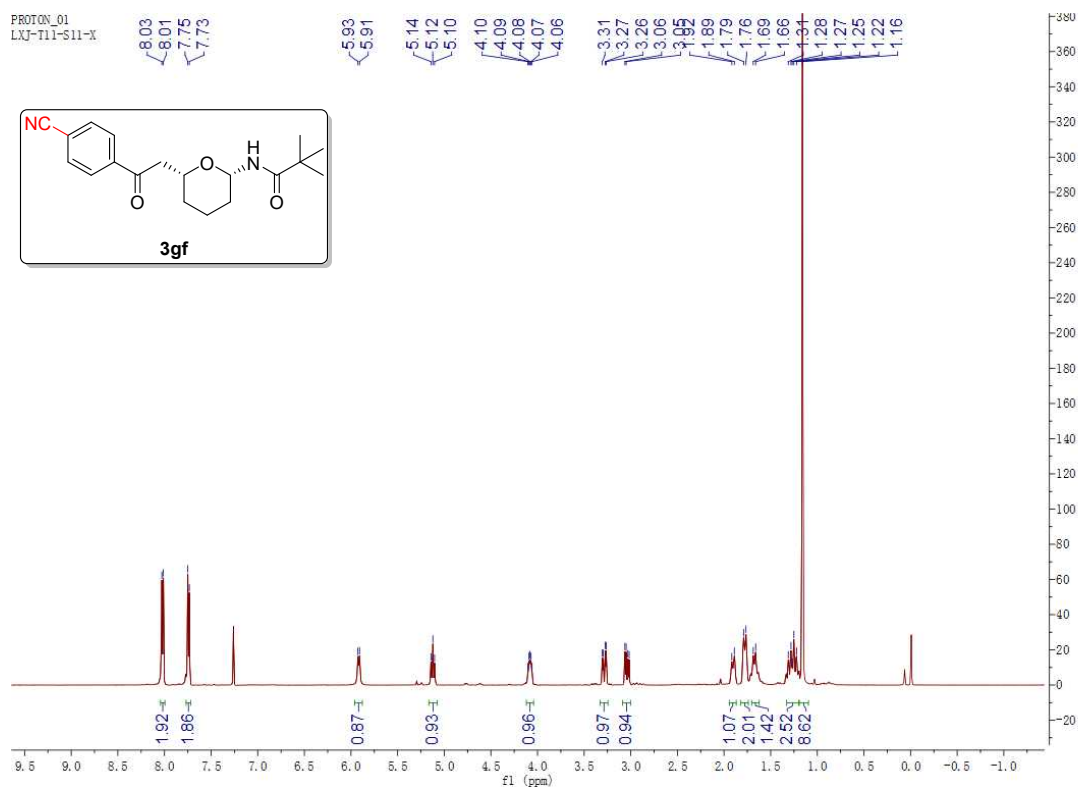

### The <sup>13</sup>C NMR spectrum of 3gf (101 MHz, CDCl<sub>3</sub>)

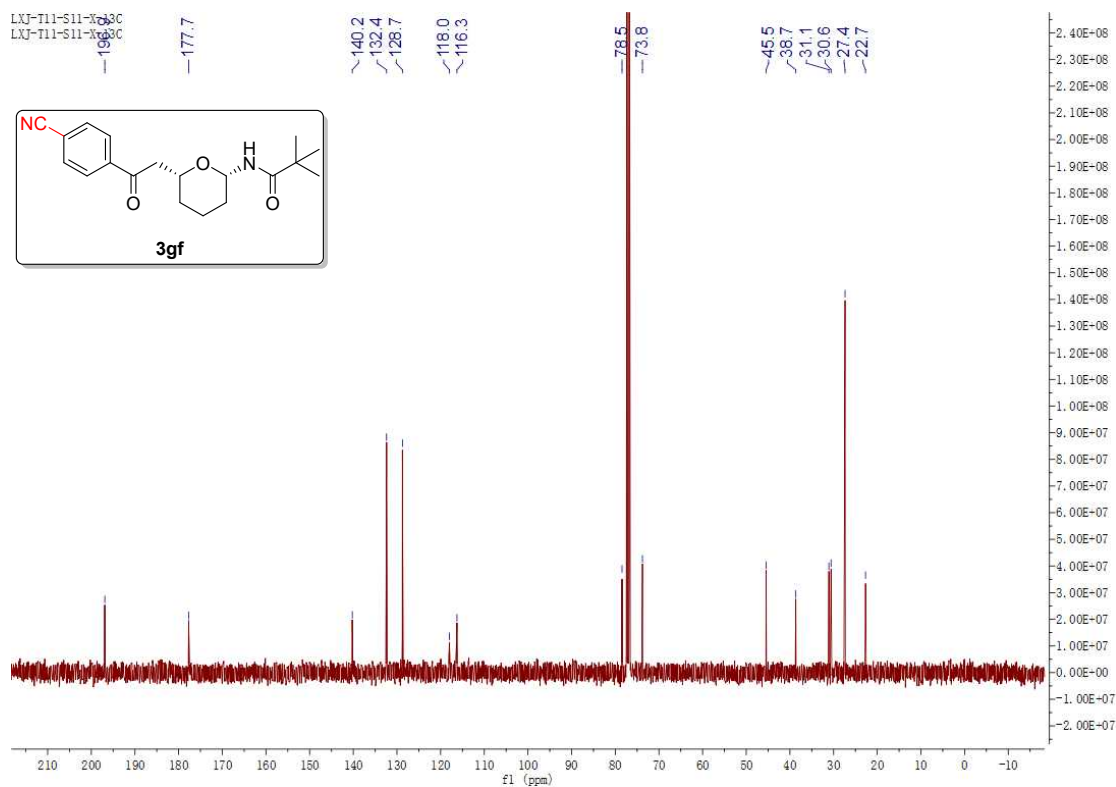

## The HPLC of racemic 3gf

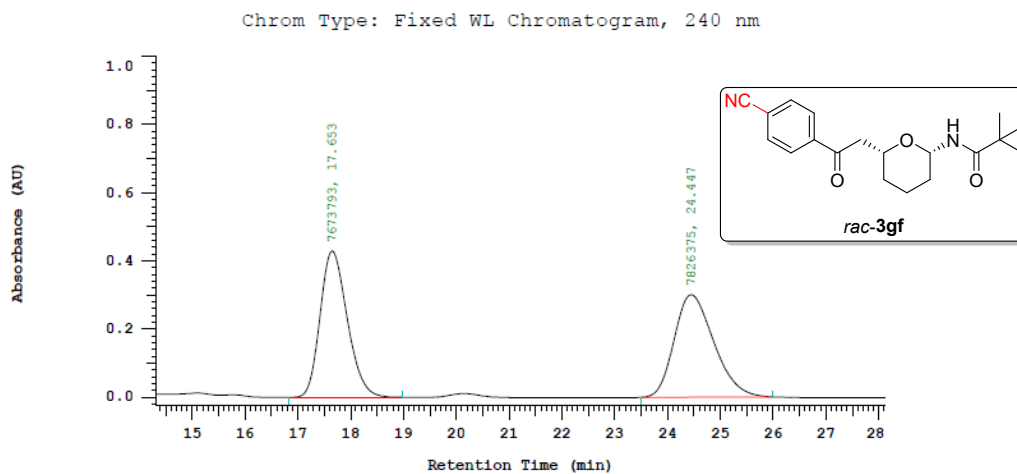

Chrom Type: Fixed WL Chromatogram, 240 nm  
Peak Quantitation: AREA  
Calculation Method: AREA%

| No. | RT     | Area     | Area %  | BC |
|-----|--------|----------|---------|----|
| 1   | 17.653 | 7673793  | 49.508  | BB |
| 2   | 24.447 | 7826375  | 50.492  | BB |
|     |        | 15500168 | 100.000 |    |

## The HPLC of chiral 3gf

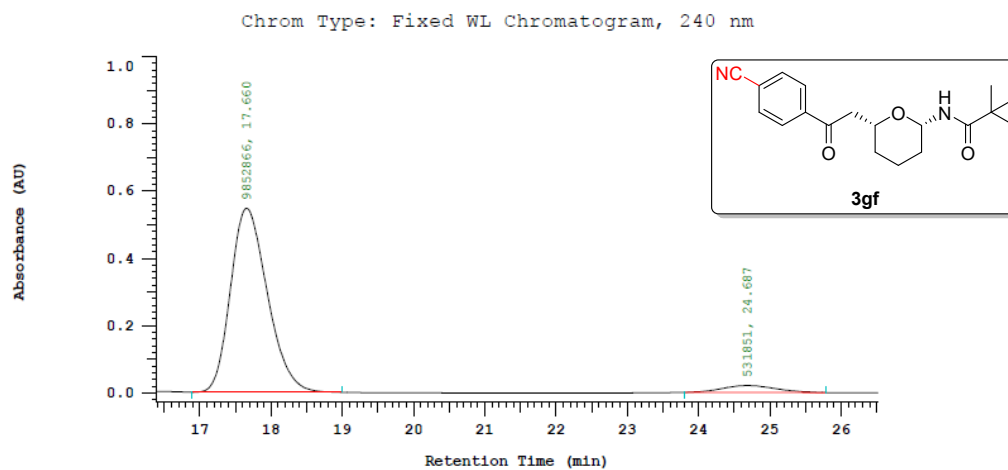

Chrom Type: Fixed WL Chromatogram, 240 nm  
Peak Quantitation: AREA  
Calculation Method: AREA%

| No. | RT     | Area     | Area %  | BC |
|-----|--------|----------|---------|----|
| 1   | 17.660 | 9852866  | 94.879  | BB |
| 2   | 24.687 | 531851   | 5.121   | BB |
|     |        | 10384717 | 100.000 |    |

### The $^1\text{H}$ NMR spectrum of 3hf (400 MHz, $\text{CDCl}_3$ )

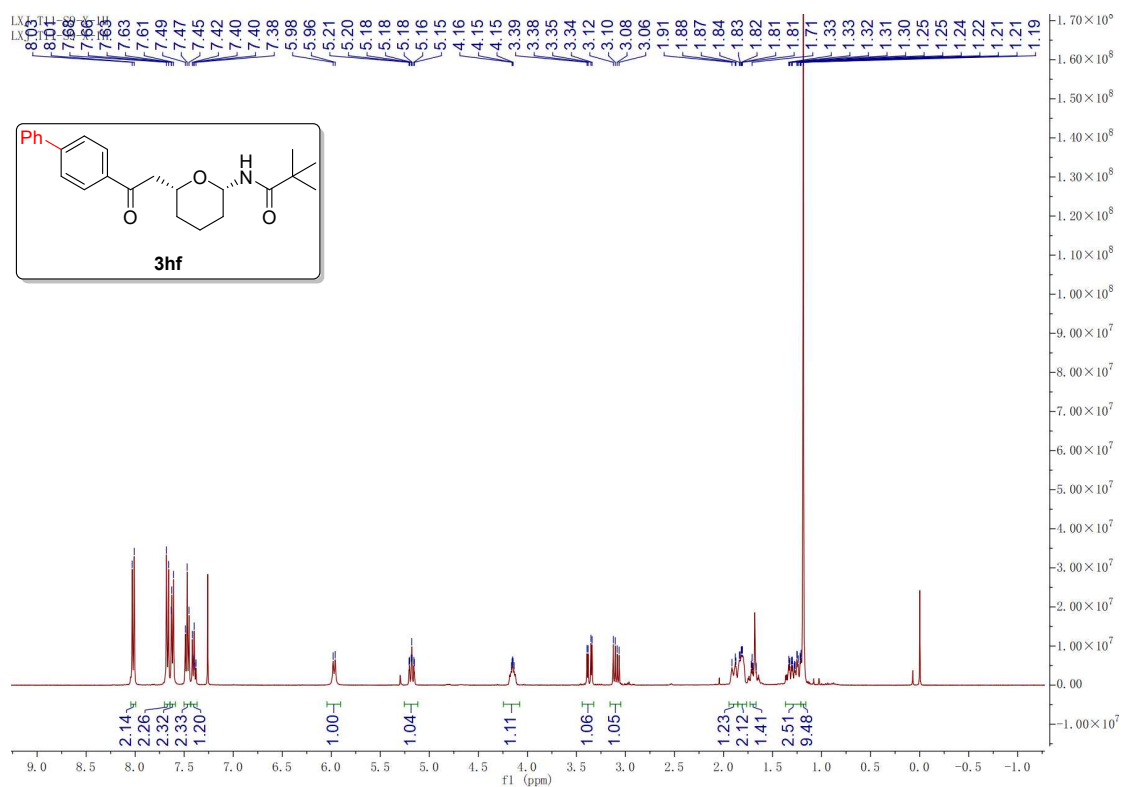

### The $^{13}\text{C}$ NMR spectrum of 3hf (125 MHz, $\text{CDCl}_3$ )

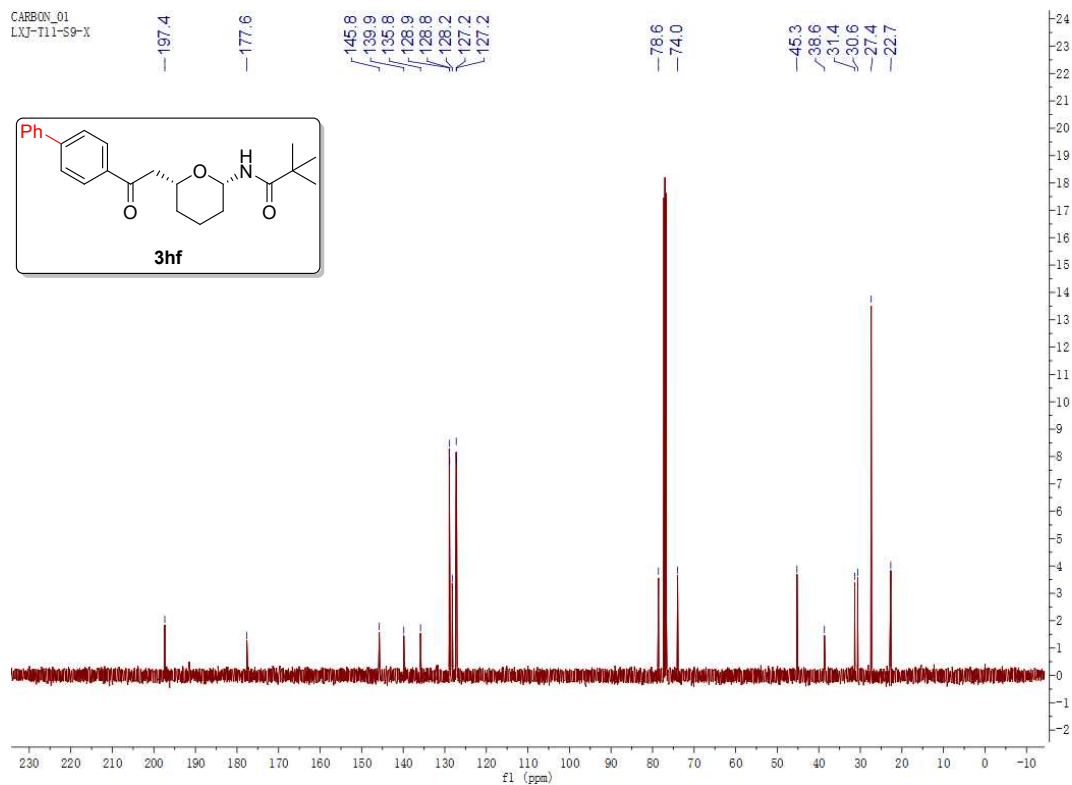

## The HPLC of racemic 3hf

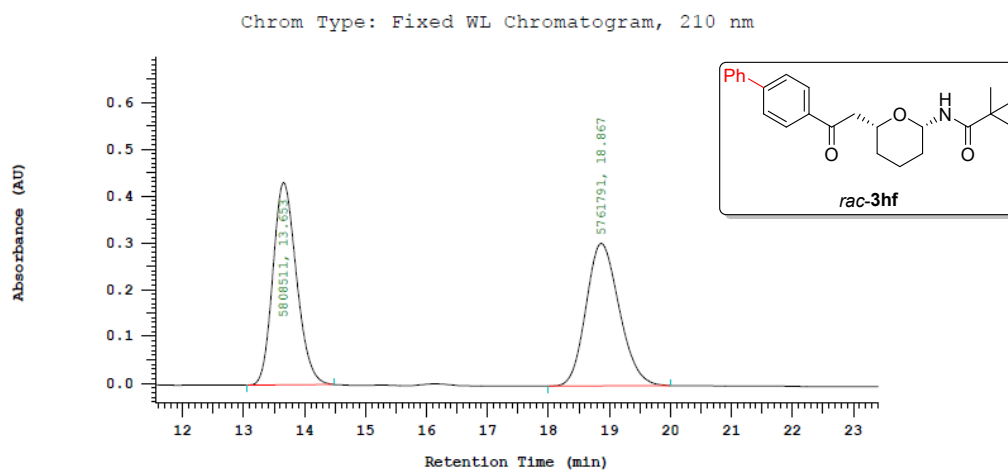

Chrom Type: Fixed WL Chromatogram, 210 nm  
 Peak Quantitation: AREA  
 Calculation Method: AREA%

| No. | RT     | Area     | Area %  | BC |
|-----|--------|----------|---------|----|
| 1   | 13.653 | 5808511  | 50.202  | BB |
| 2   | 18.867 | 5761791  | 49.798  | BB |
|     |        | 11570302 | 100.000 |    |

## The HPLC of chiral 3hf

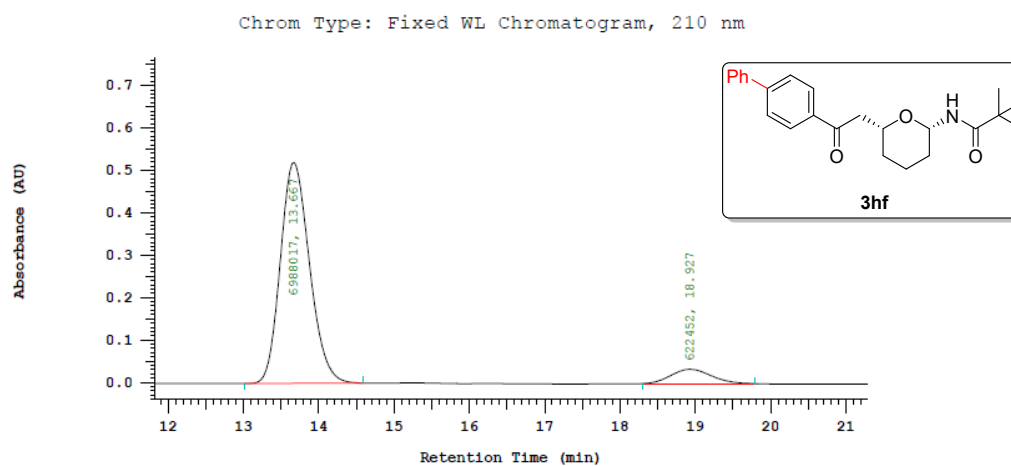

Chrom Type: Fixed WL Chromatogram, 210 nm  
 Peak Quantitation: AREA  
 Calculation Method: AREA%

| No. | RT     | Area    | Area %  | BC |
|-----|--------|---------|---------|----|
| 1   | 13.667 | 6988017 | 91.821  | BB |
| 2   | 18.927 | 622452  | 8.179   | BB |
|     |        | 7610469 | 100.000 |    |

### The <sup>1</sup>H NMR spectrum of 3if (400 MHz, CDCl<sub>3</sub>)

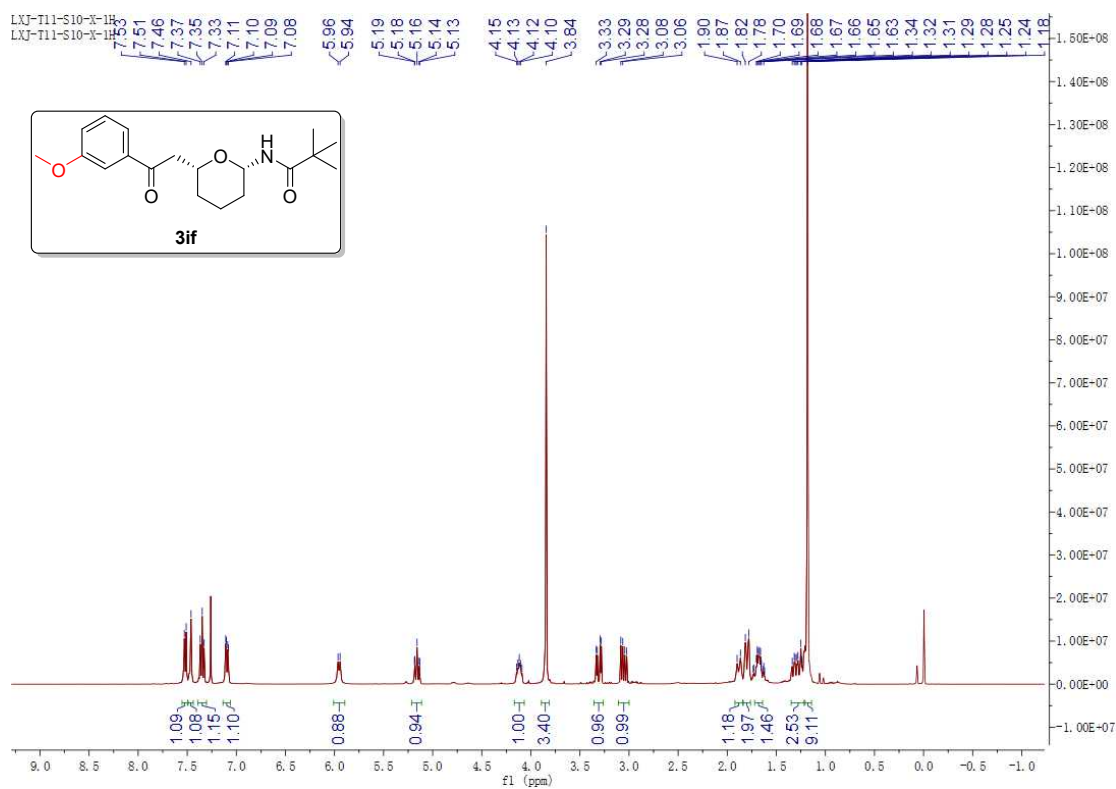

### The <sup>13</sup>C NMR spectrum of 3if (101 MHz, CDCl<sub>3</sub>)

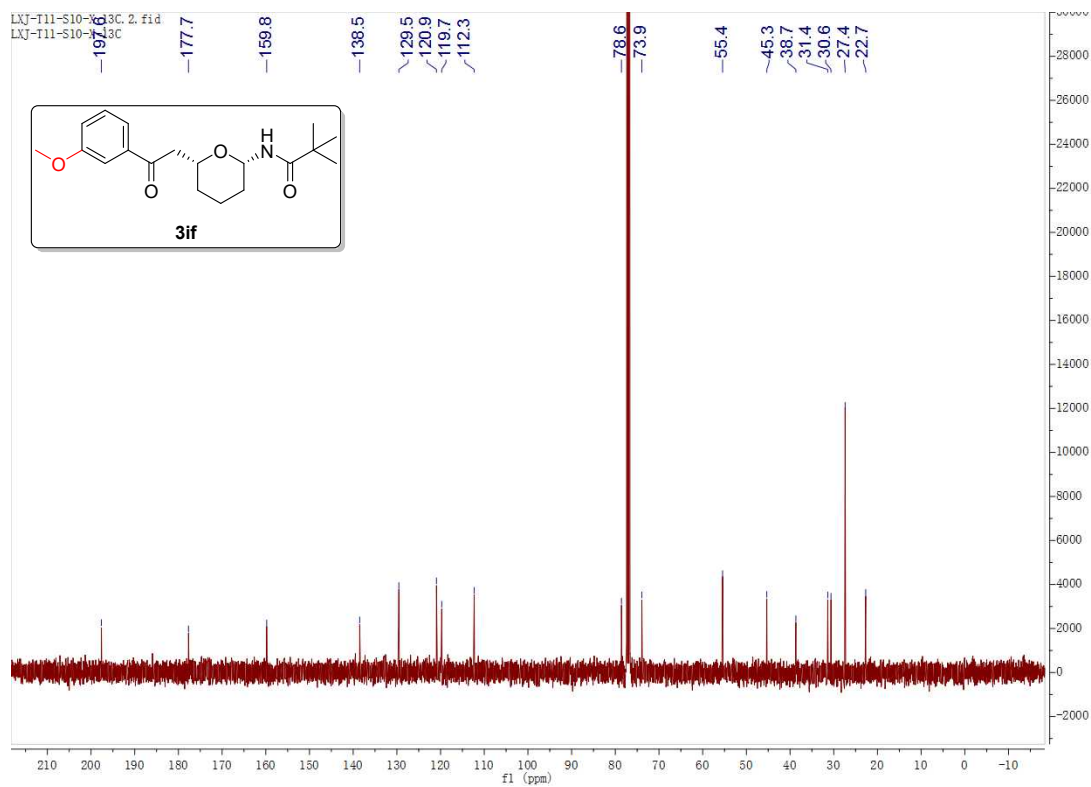

## The HPLC of racemic 3if

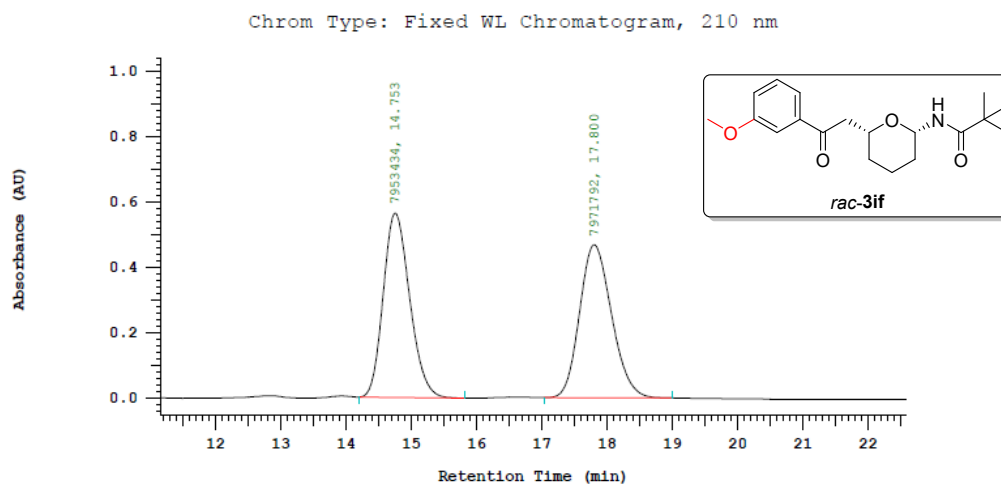

Chrom Type: Fixed WL Chromatogram, 210 nm  
 Peak Quantitation: AREA  
 Calculation Method: AREA%

| No. | RT     | Area     | Area %  | BC |
|-----|--------|----------|---------|----|
| 1   | 14.753 | 7953434  | 49.942  | BB |
| 2   | 17.800 | 7971792  | 50.058  | BB |
|     |        | 15925226 | 100.000 |    |

## The HPLC of chiral 3if

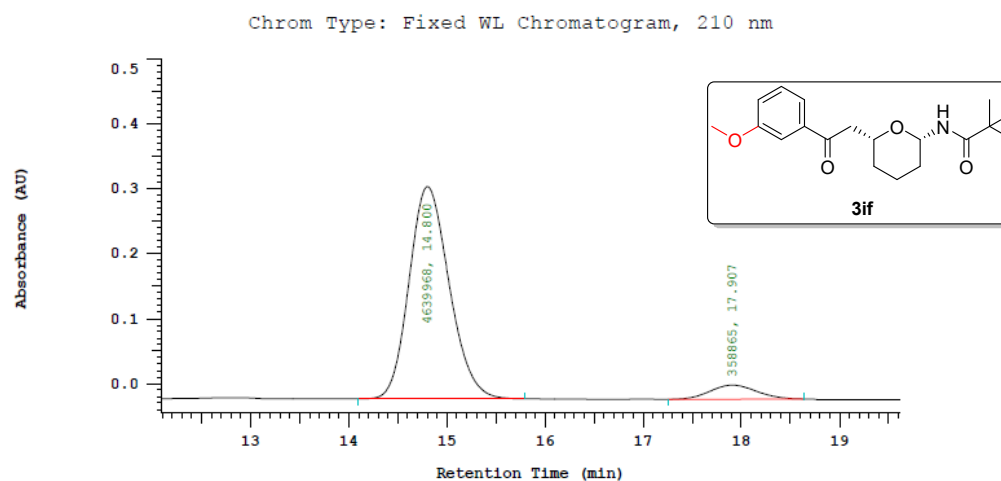

Chrom Type: Fixed WL Chromatogram, 210 nm  
 Peak Quantitation: AREA  
 Calculation Method: AREA%

| No. | RT     | Area    | Area %  | BC |
|-----|--------|---------|---------|----|
| 1   | 14.800 | 4639968 | 92.821  | BB |
| 2   | 17.907 | 358865  | 7.179   | BB |
|     |        | 4998833 | 100.000 |    |



### The <sup>1</sup>H NMR spectrum of 3jf (400 MHz, CDCl<sub>3</sub>)

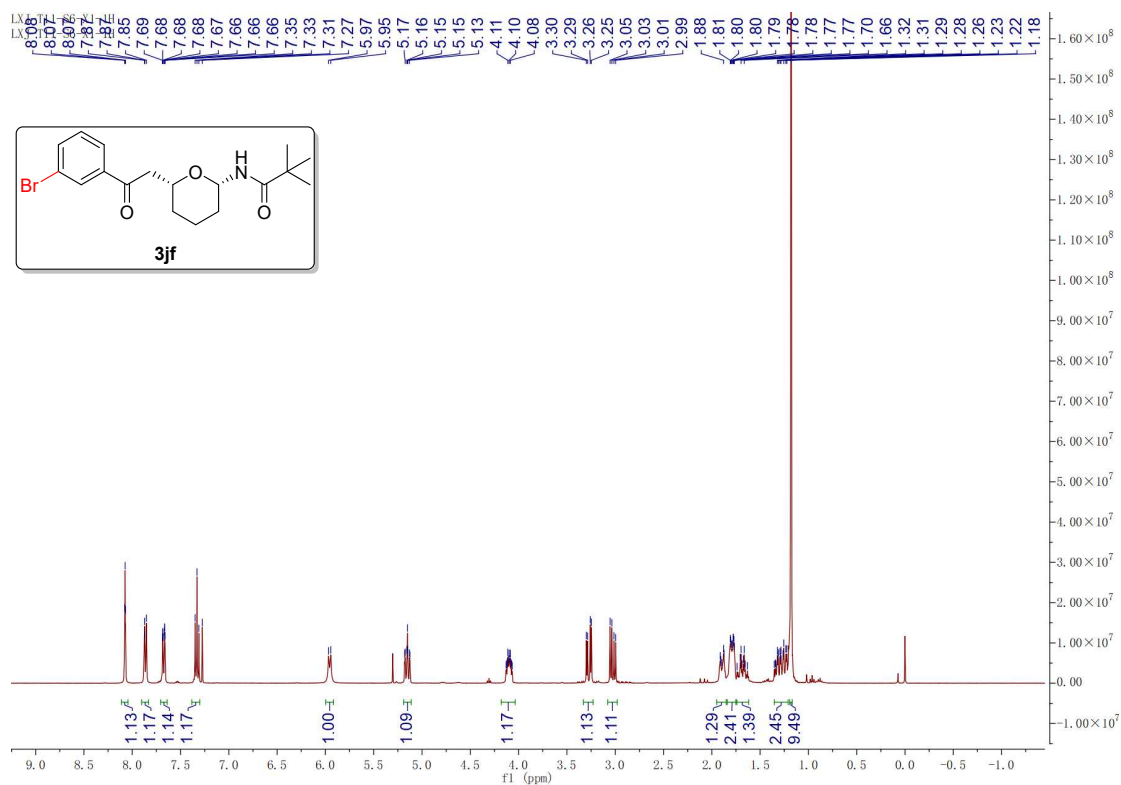

### The <sup>13</sup>C NMR spectrum of 3jf (101 MHz, CDCl<sub>3</sub>)

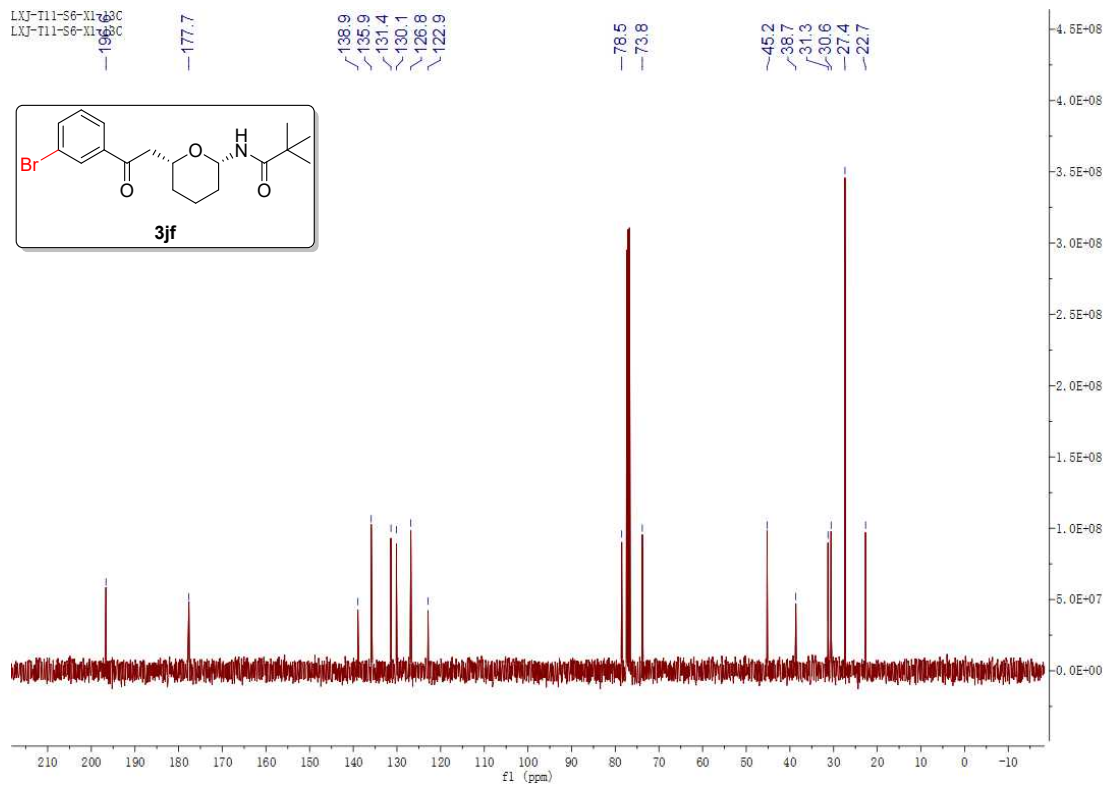

## The HPLC of racemic 3jf

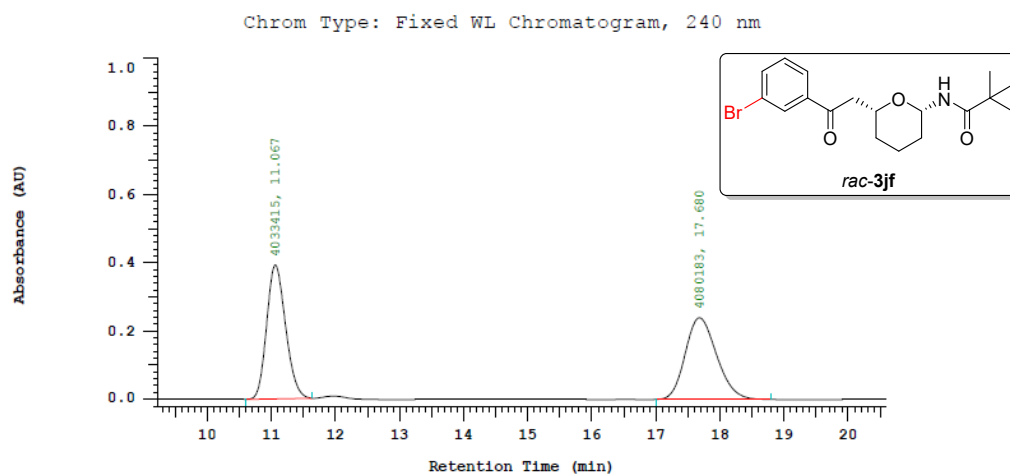

Chrom Type: Fixed WL Chromatogram, 240 nm  
Peak Quantitation: AREA  
Calculation Method: AREA%

| No. | RT     | Area    | Area %  | BC |
|-----|--------|---------|---------|----|
| 1   | 11.067 | 4033415 | 49.712  | BB |
| 2   | 17.680 | 4080183 | 50.288  | BB |
|     |        | 8113598 | 100.000 |    |

## The HPLC of chiral 3jf

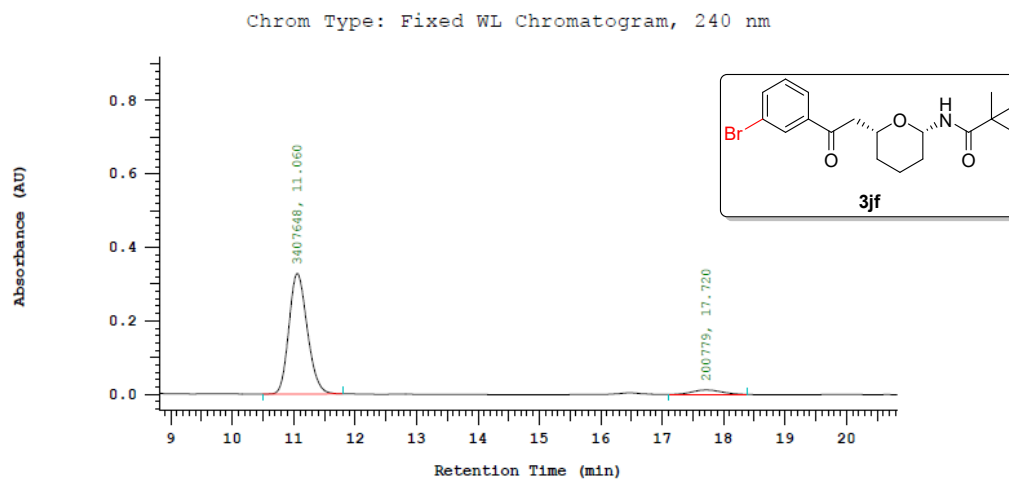

Chrom Type: Fixed WL Chromatogram, 240 nm  
Peak Quantitation: AREA  
Calculation Method: AREA%

| No. | RT     | Area    | Area %  | BC |
|-----|--------|---------|---------|----|
| 1   | 11.060 | 3407648 | 94.436  | BB |
| 2   | 17.720 | 200779  | 5.564   | BB |
|     |        | 3608427 | 100.000 |    |

### The <sup>1</sup>H NMR spectrum of 3kf (400 MHz, CDCl<sub>3</sub>)

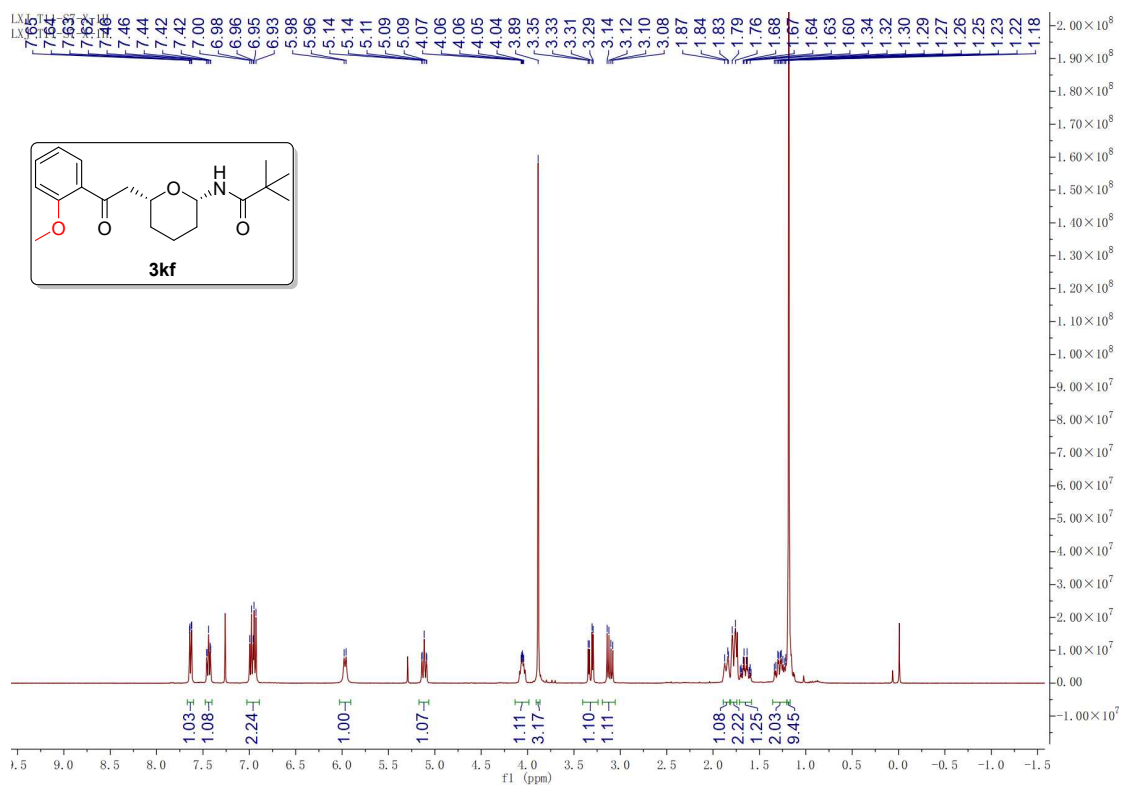

### The <sup>13</sup>C NMR spectrum of 3kf (125 MHz, CDCl<sub>3</sub>)

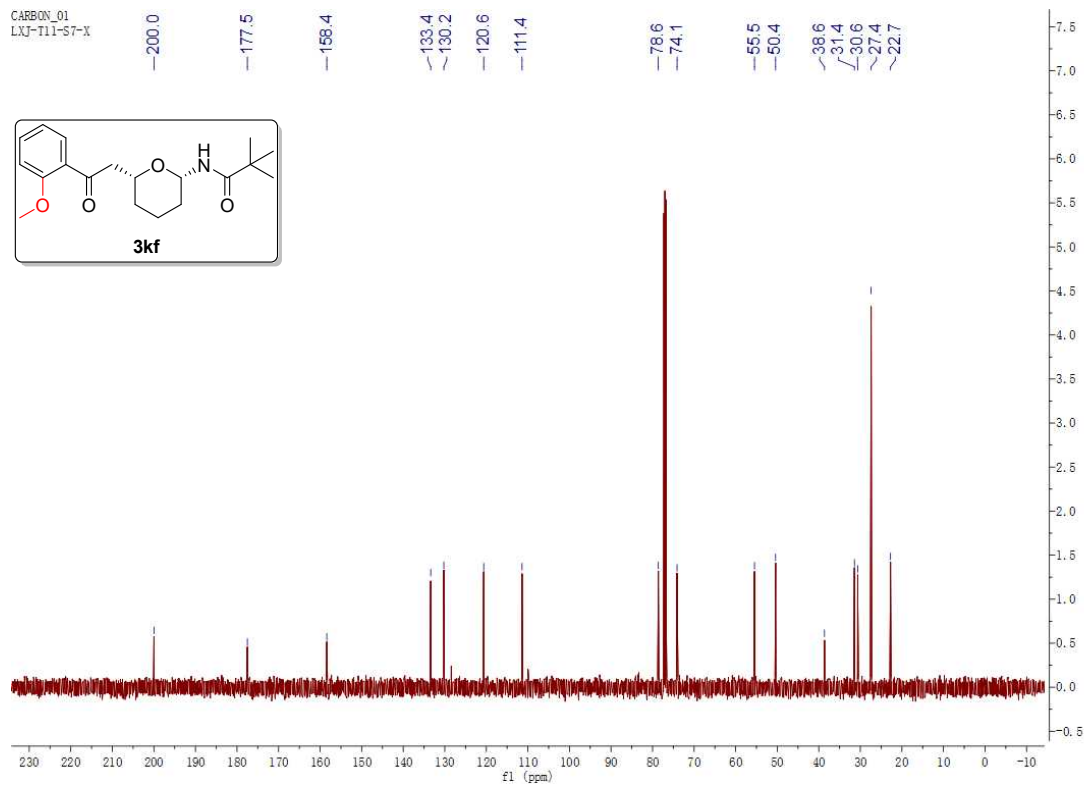

## The HPLC of racemic 3kf

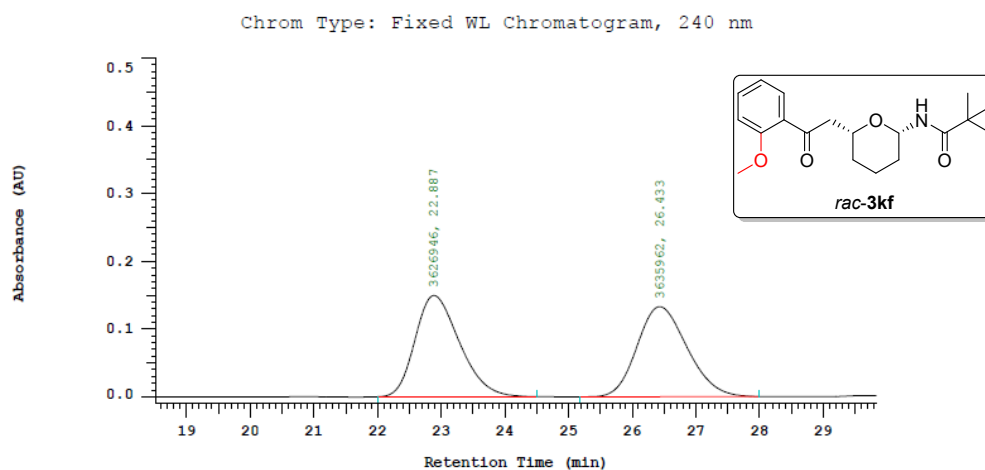

Chrom Type: Fixed WL Chromatogram, 240 nm  
 Peak Quantitation: AREA  
 Calculation Method: AREA%

| No. | RT     | Area    | Area %  | BC |
|-----|--------|---------|---------|----|
| 1   | 22.887 | 3626946 | 49.938  | BB |
| 2   | 26.433 | 3635962 | 50.062  | BB |
|     |        | 7262908 | 100.000 |    |

## The HPLC of chiral 3kf

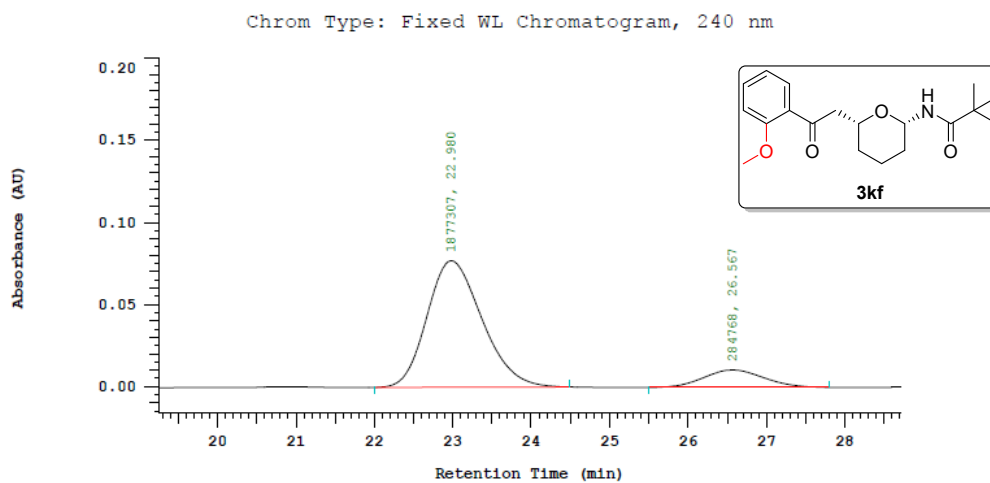

Chrom Type: Fixed WL Chromatogram, 240 nm  
 Peak Quantitation: AREA  
 Calculation Method: AREA%

| No. | RT     | Area    | Area %  | BC |
|-----|--------|---------|---------|----|
| 1   | 22.980 | 1877307 | 86.829  | BB |
| 2   | 26.567 | 284768  | 13.171  | BB |
|     |        | 2162075 | 100.000 |    |

The <sup>1</sup>H NMR spectrum of 3lf (400 MHz, CDCl<sub>3</sub>)

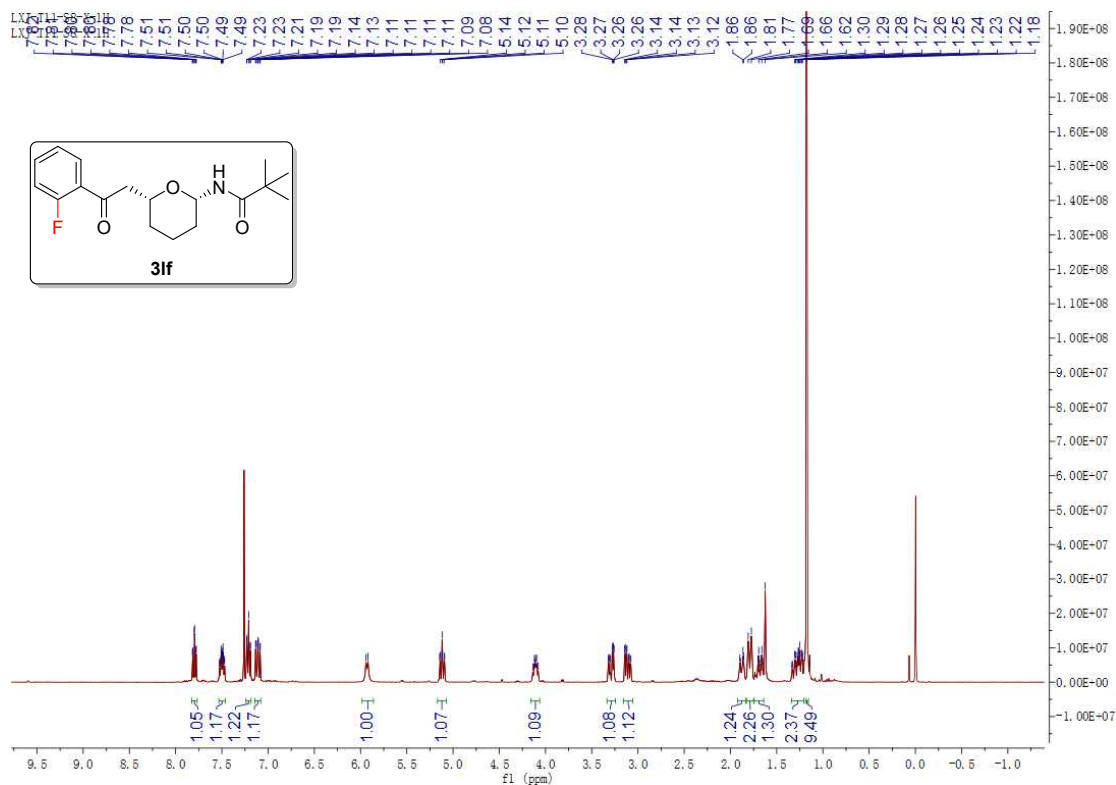

The <sup>13</sup>C NMR spectrum of 3lf (101 MHz, CDCl<sub>3</sub>)

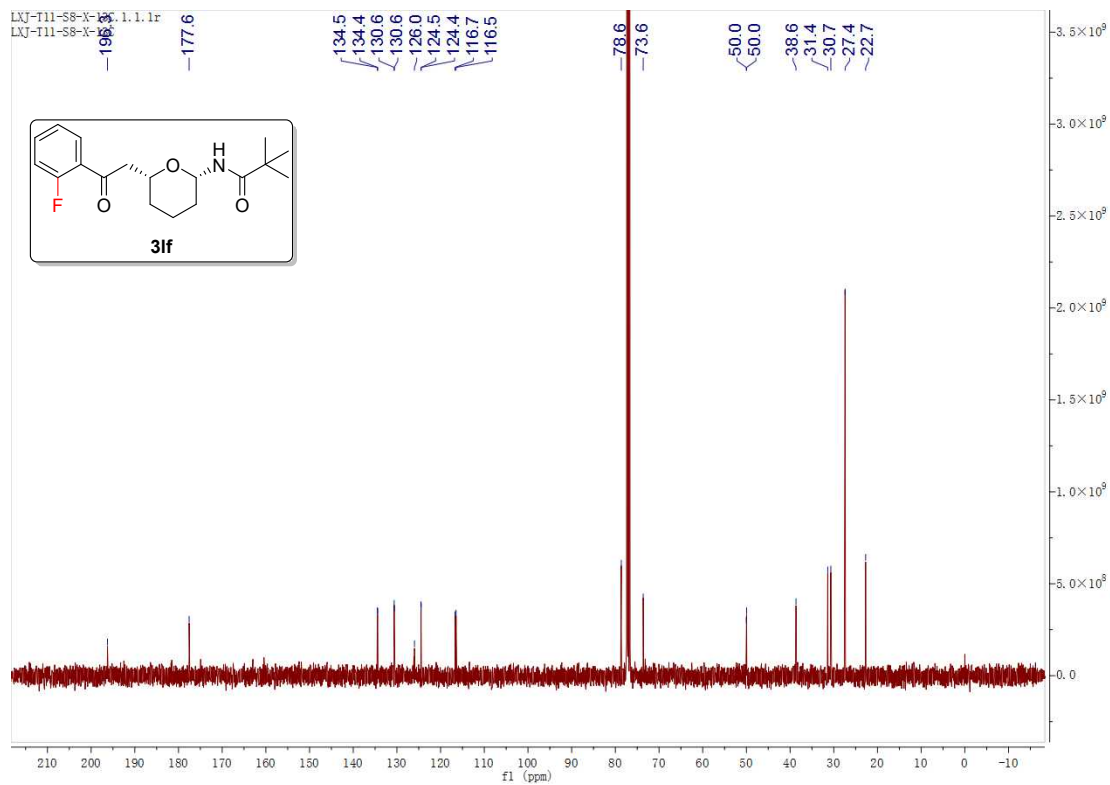

## The <sup>19</sup>F NMR spectrum of 3lf (376 MHz, CDCl<sub>3</sub>)

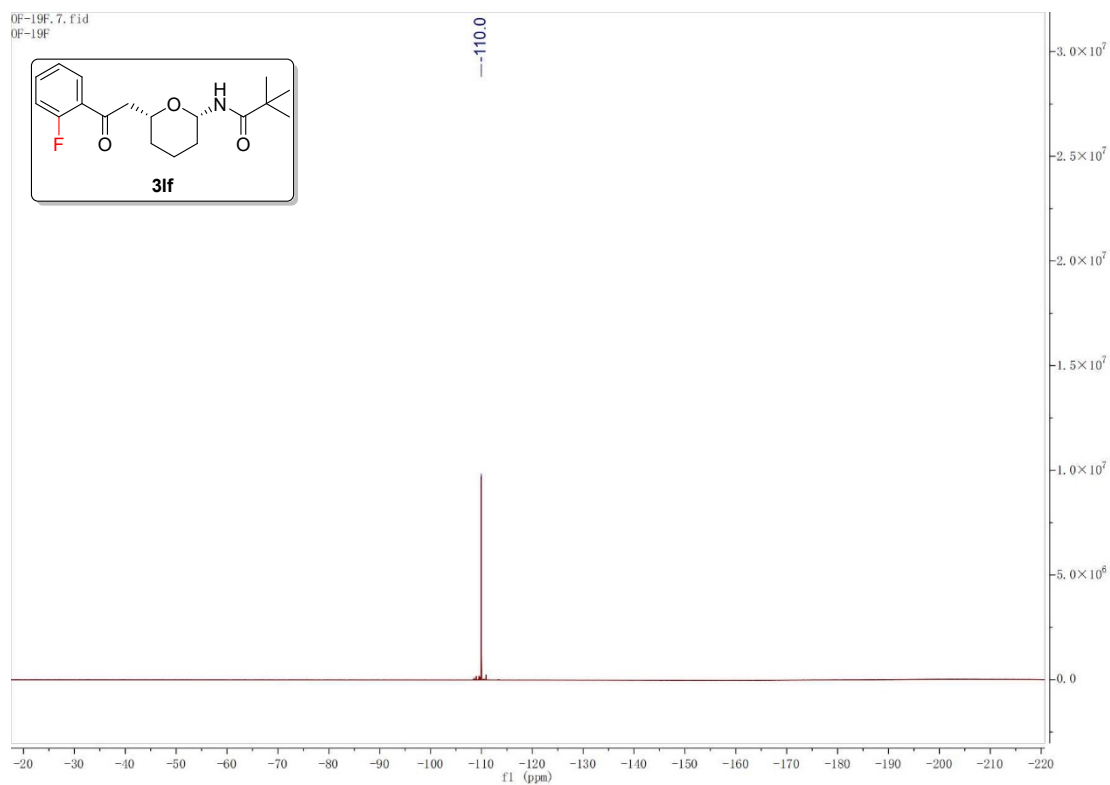

## The HPLC of racemic 3lf

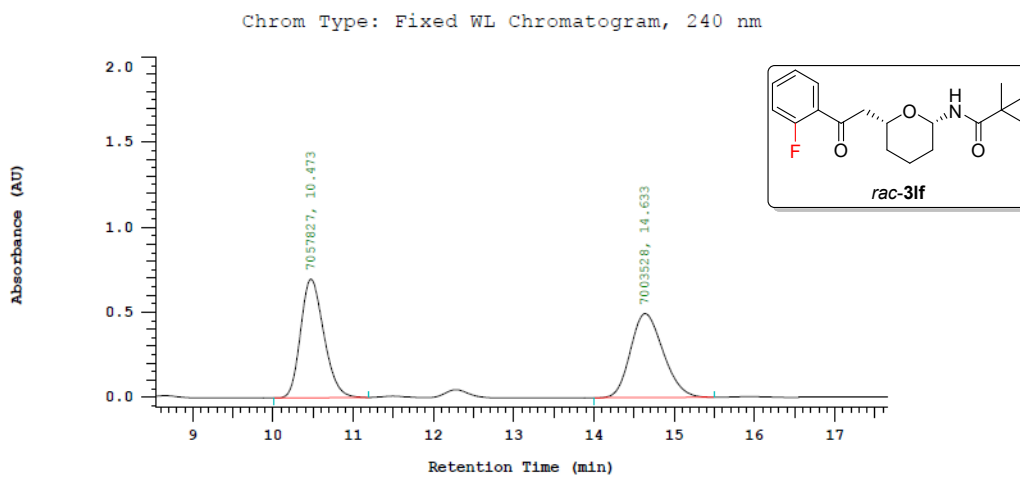

Chrom Type: Fixed WL Chromatogram, 240 nm

Peak Quantitation: AREA  
Calculation Method: AREA%

| No. | RT     | Area     | Area %  | BC |
|-----|--------|----------|---------|----|
| 1   | 10.473 | 7057827  | 50.193  | BB |
| 2   | 14.633 | 7003528  | 49.807  | BB |
|     |        | 14061355 | 100.000 |    |

## The HPLC of chiral 3lf

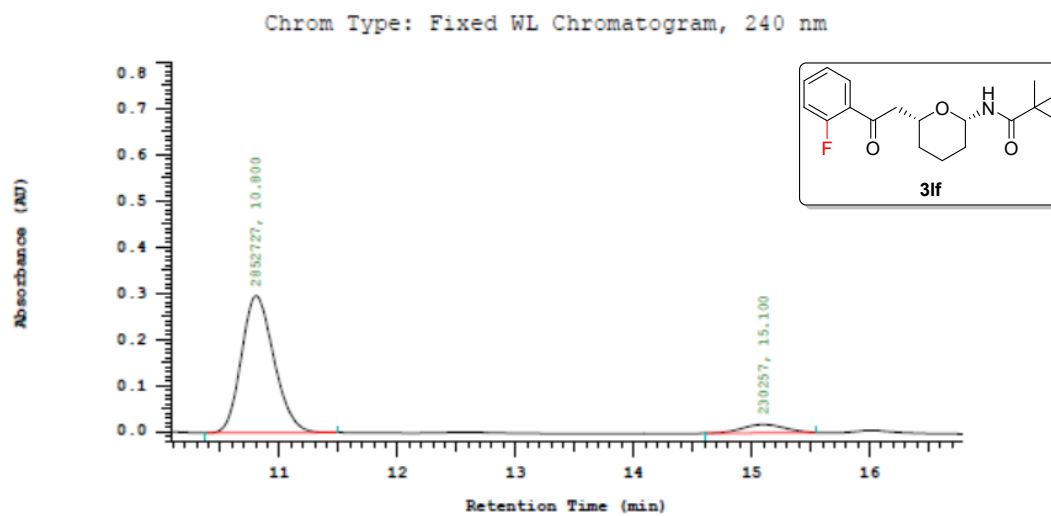

Chrom Type: Fixed WL Chromatogram, 240 nm  
Peak Quantitation: AREA  
Calculation Method: AREA%

| No. | RT     | Area    | Area %  | BC |
|-----|--------|---------|---------|----|
| 1   | 10.800 | 2852727 | 92.531  | BB |
| 2   | 15.100 | 230257  | 7.469   | BB |
|     |        | 3082984 | 100.000 |    |

## The <sup>1</sup>H NMR spectrum of 3mf (400 MHz, CDCl<sub>3</sub>)

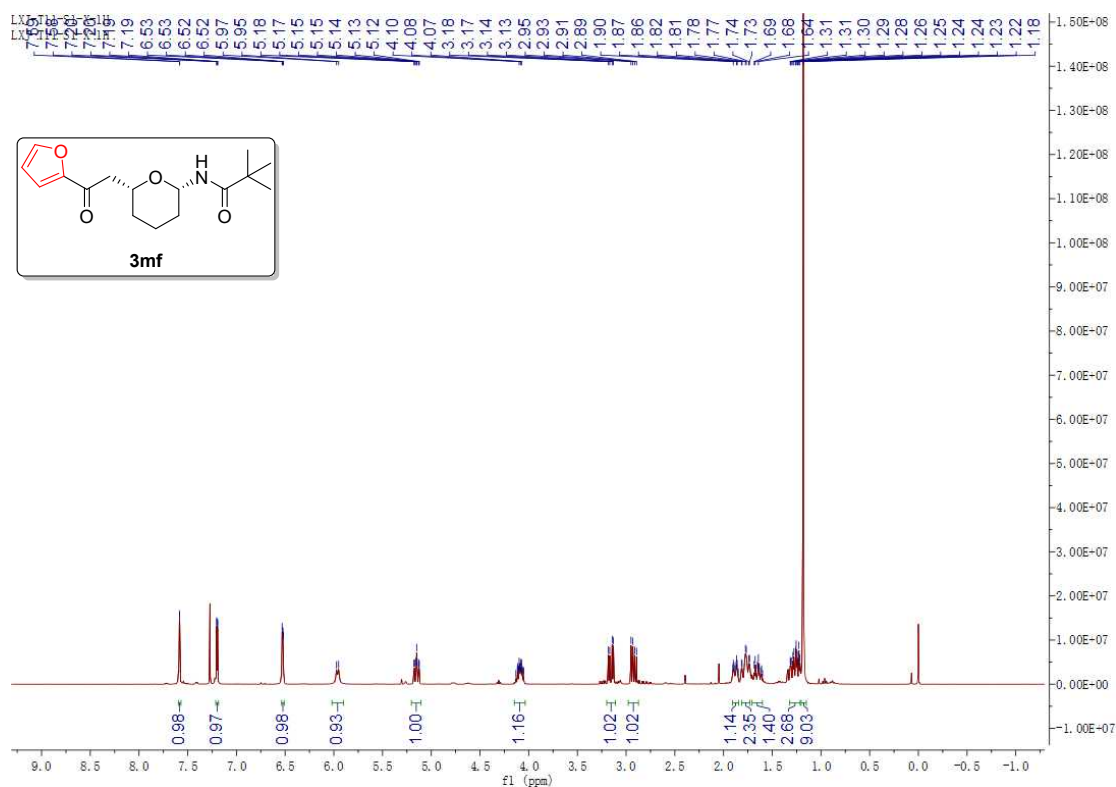

### The <sup>13</sup>C NMR spectrum of 3mf (101 MHz, CDCl<sub>3</sub>)

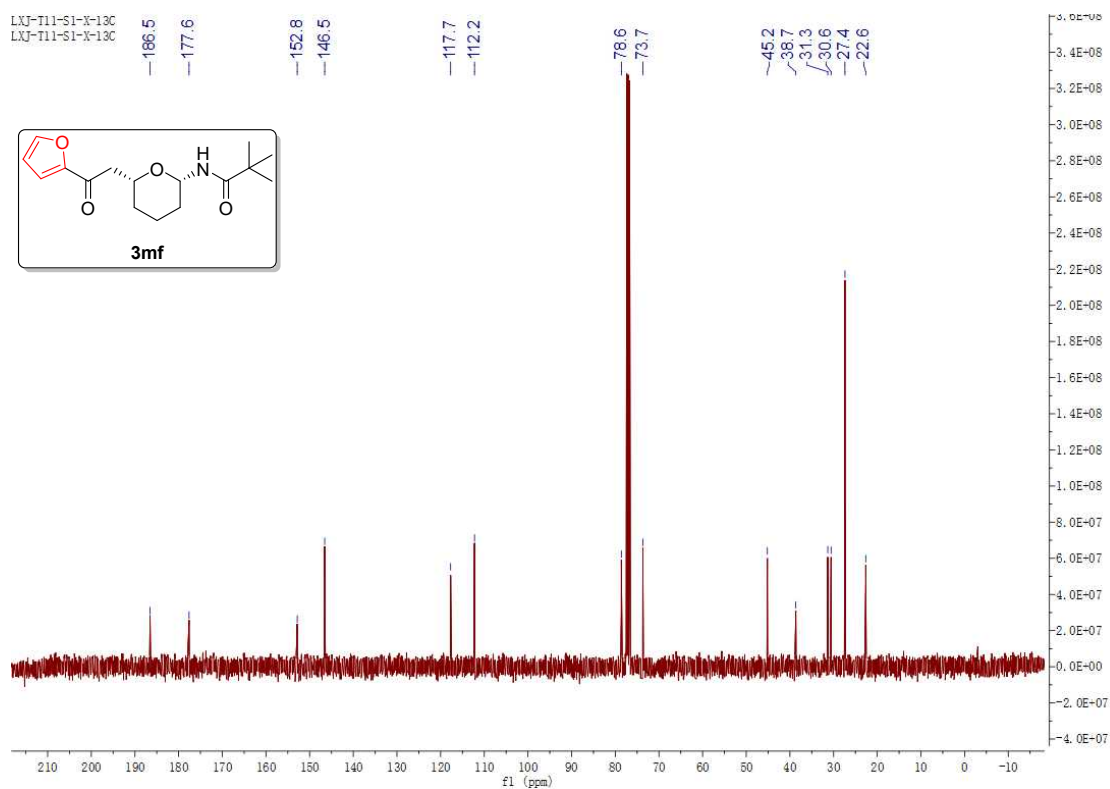

### The HPLC of racemic 3mf

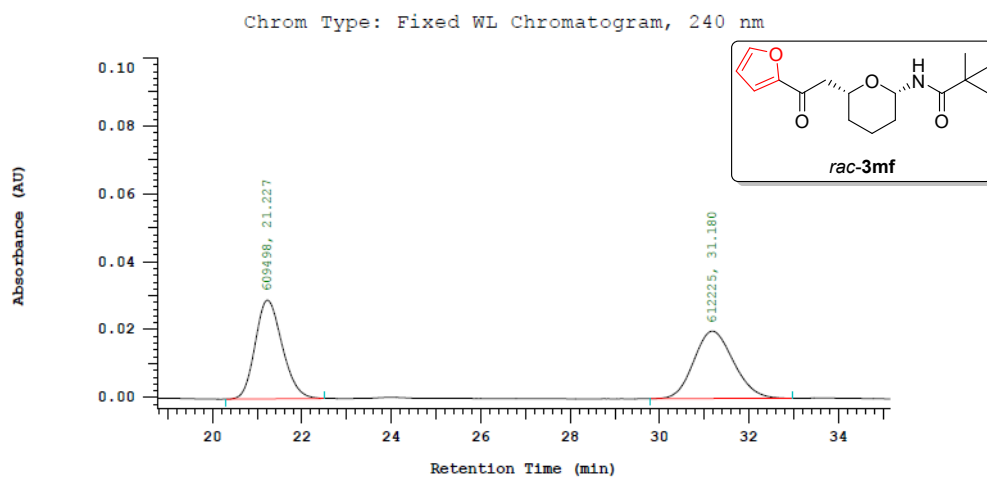

Chrom Type: Fixed WL Chromatogram, 240 nm  
Peak Quantitation: AREA  
Calculation Method: AREA%

| No. | RT     | Area    | Area %  | BC |
|-----|--------|---------|---------|----|
| 1   | 21.227 | 609498  | 49.888  | BB |
| 2   | 31.180 | 612225  | 50.112  | BB |
|     |        | 1221723 | 100.000 |    |



## The HPLC of chiral 3mf

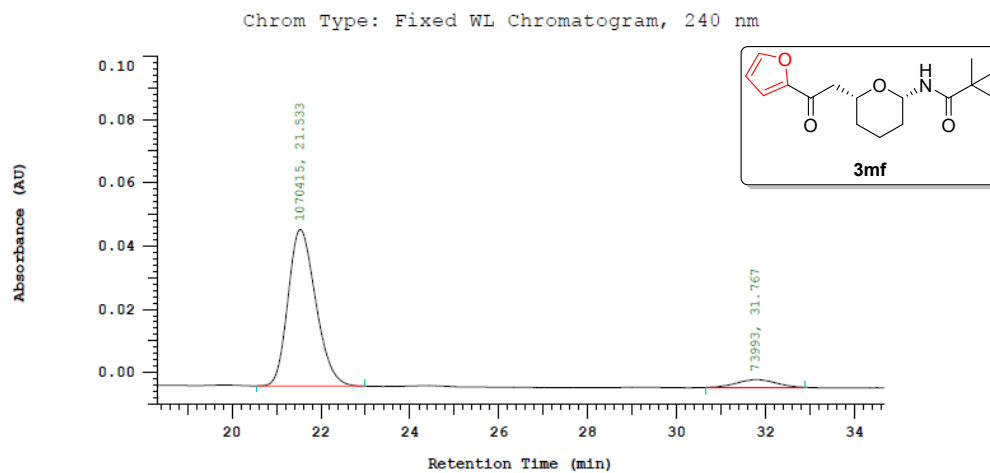

Chrom Type: Fixed WL Chromatogram, 240 nm

Peak Quantitation: AREA  
Calculation Method: AREA%

| No. | RT     | Area    | Area %  | BC |
|-----|--------|---------|---------|----|
| 1   | 21.533 | 1070415 | 93.534  | BB |
| 2   | 31.767 | 73993   | 6.466   | BB |
|     |        | 1144408 | 100.000 |    |

## The <sup>1</sup>H NMR spectrum of 3nf (400 MHz, CDCl<sub>3</sub>)

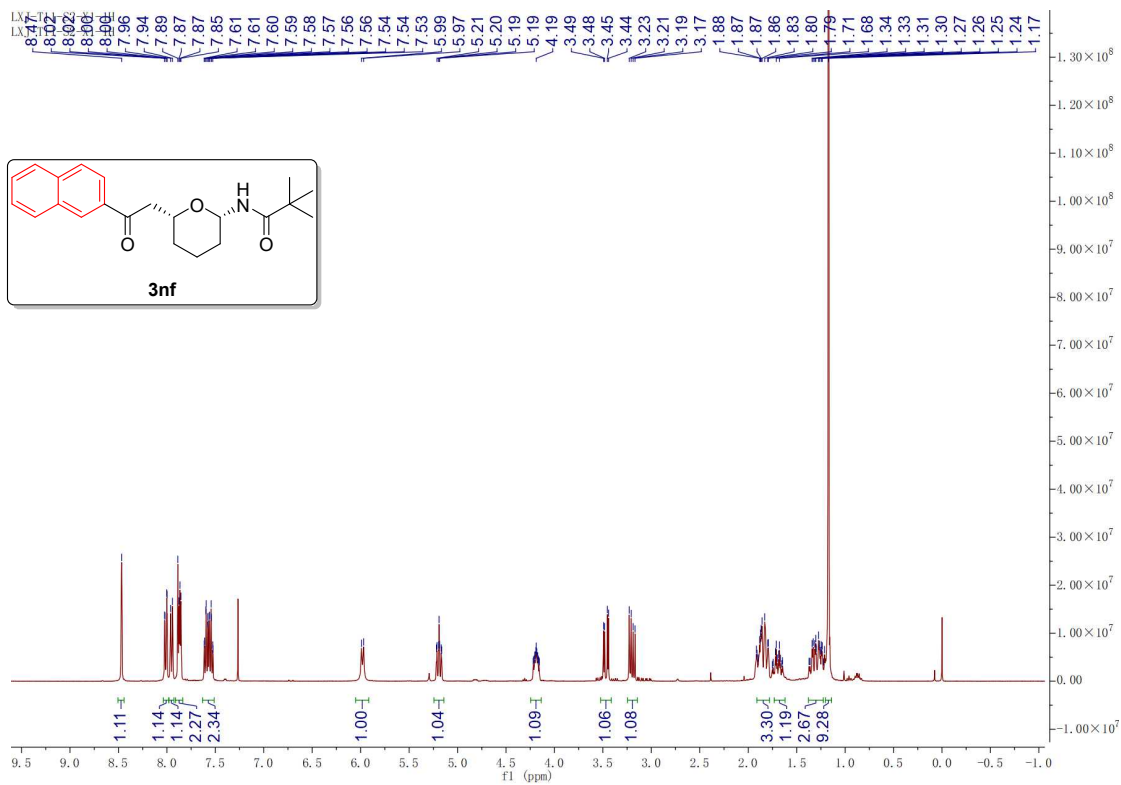

### The <sup>13</sup>C NMR spectrum of 3nf (101 MHz, CDCl<sub>3</sub>)

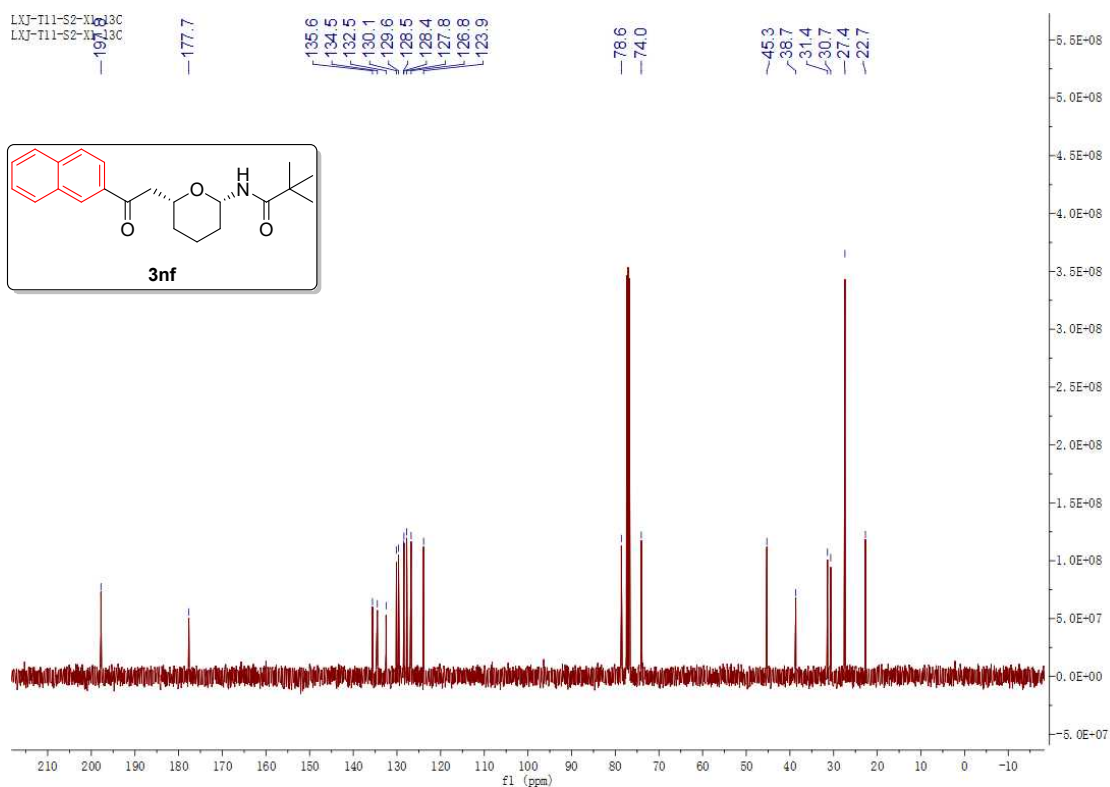

### The HPLC of racemic 3nf

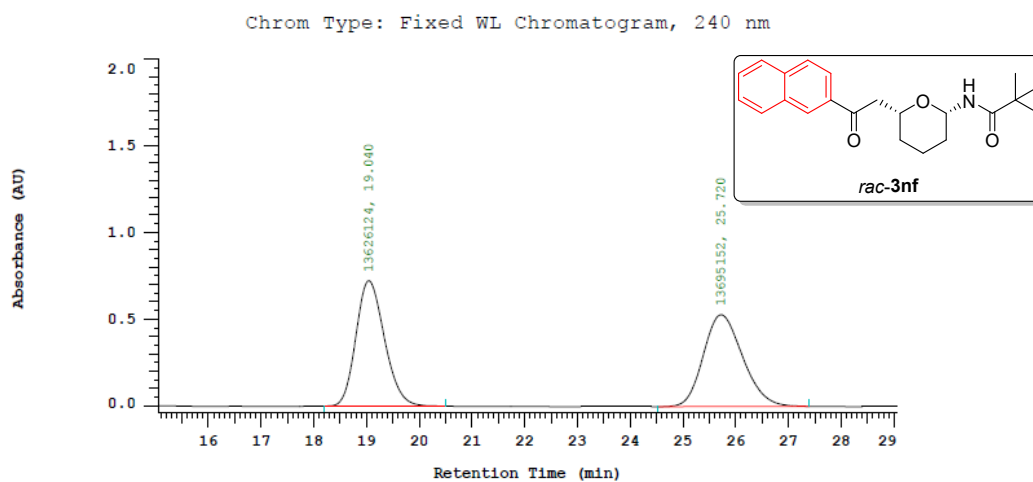

Chrom Type: Fixed WL Chromatogram, 240 nm

Peak Quantitation: AREA  
Calculation Method: AREA%

| No. | RT     | Area     | Area %  | BC |
|-----|--------|----------|---------|----|
| 1   | 19.040 | 13626124 | 49.874  | BB |
| 2   | 25.720 | 13695152 | 50.126  | BB |
|     |        | 27321276 | 100.000 |    |

## The HPLC of chiral 3nf

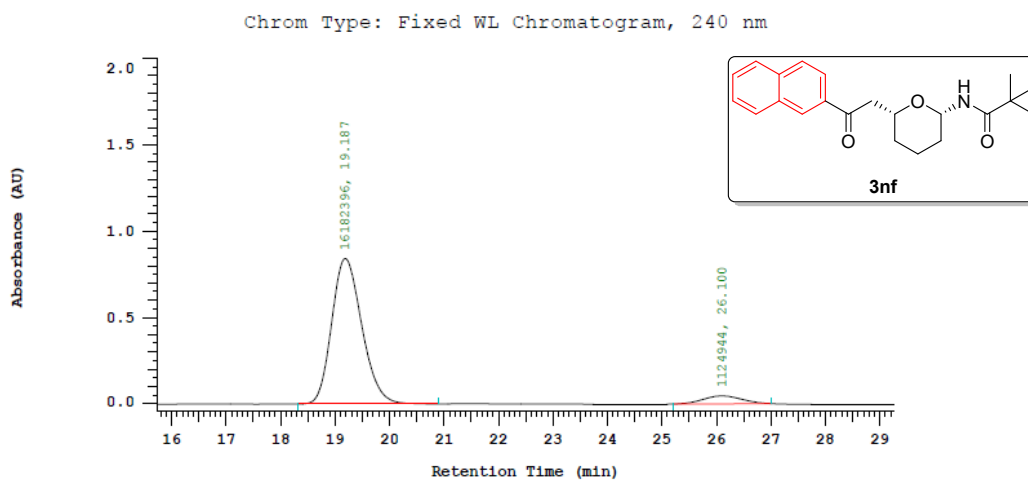

Chrom Type: Fixed WL Chromatogram, 240 nm

Peak Quantitation: AREA  
Calculation Method: AREA%

| No. | RT     | Area     | Area %  | BC |
|-----|--------|----------|---------|----|
| 1   | 19.187 | 16182396 | 93.500  | BB |
| 2   | 26.100 | 1124944  | 6.500   | BB |
|     |        | 17307340 | 100.000 |    |

## The <sup>1</sup>H NMR spectrum of 3of (400 MHz, CDCl<sub>3</sub>)

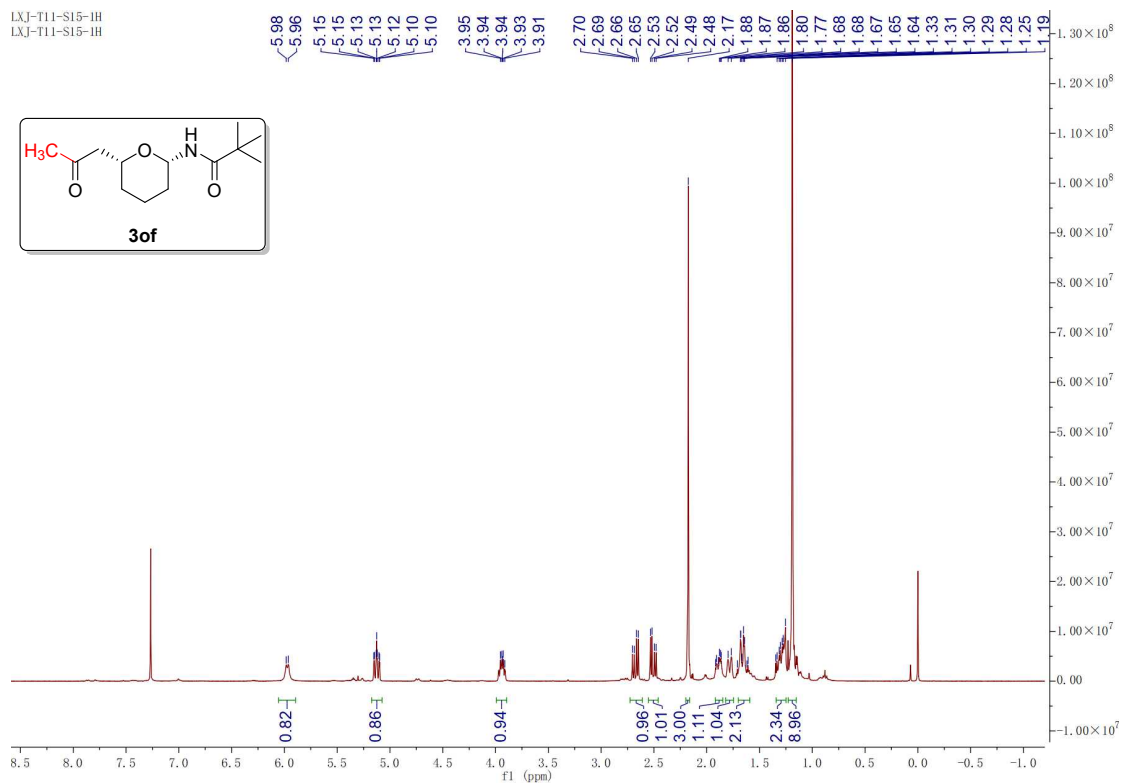

### The $^{13}\text{C}$ NMR spectrum of 3of (101 MHz, $\text{CDCl}_3$ )

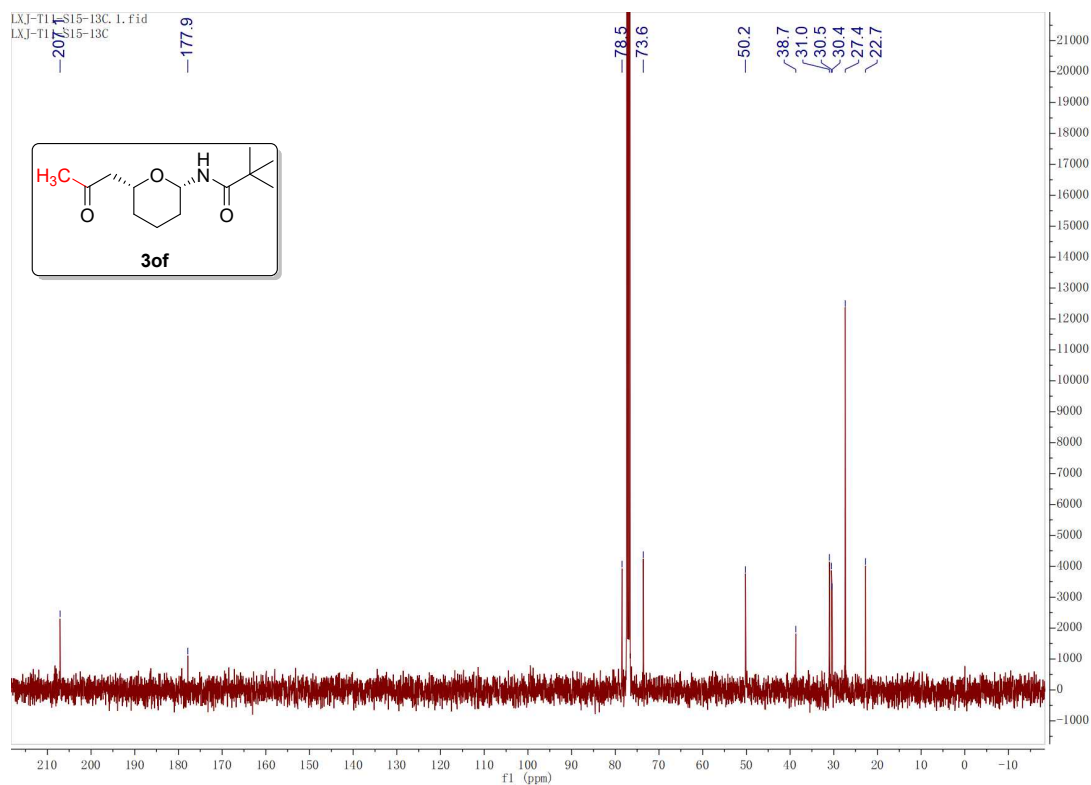

### The HPLC of racemic 3of

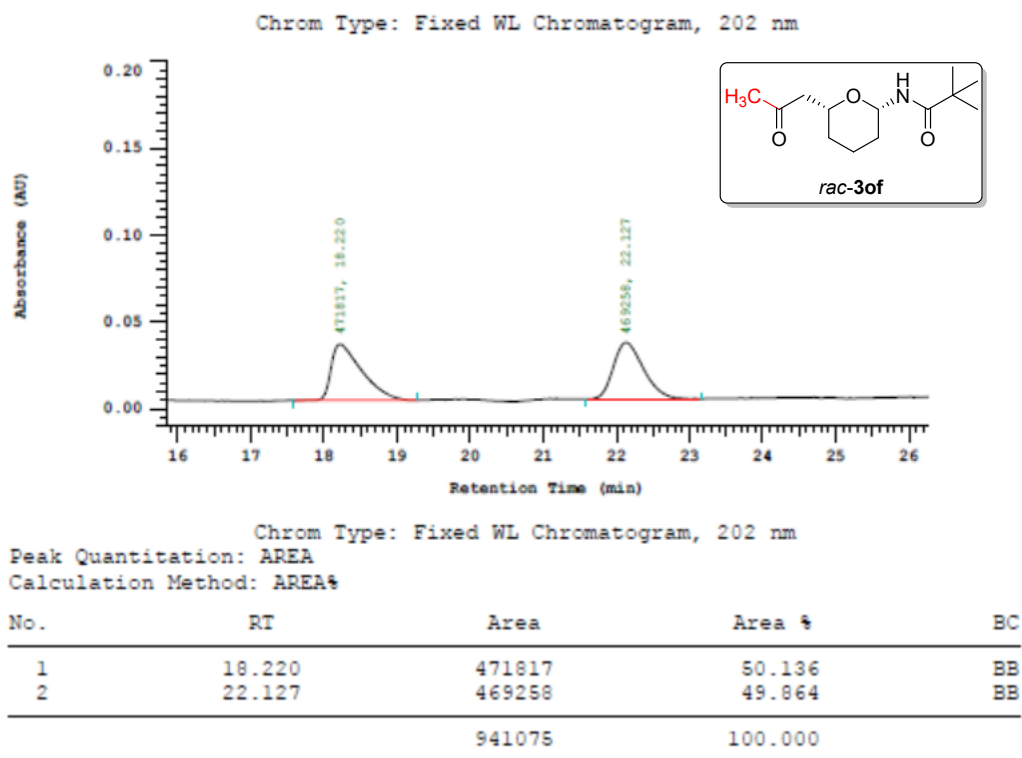

## The HPLC of chiral 3of

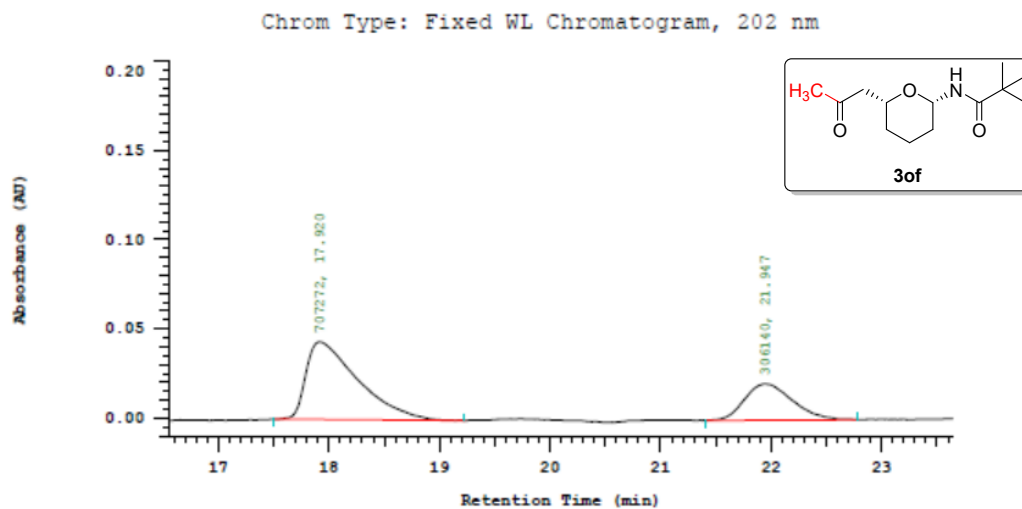

Chrom Type: Fixed WL Chromatogram, 202 nm

Peak Quantitation: AREA  
Calculation Method: AREA%

| No. | RT     | Area    | Area %  | BC |
|-----|--------|---------|---------|----|
| 1   | 17.920 | 707272  | 69.791  | BB |
| 2   | 21.947 | 306140  | 30.209  | BB |
|     |        | 1013412 | 100.000 |    |

## The <sup>1</sup>H NMR spectrum of 3pf (400 MHz, CDCl<sub>3</sub>)

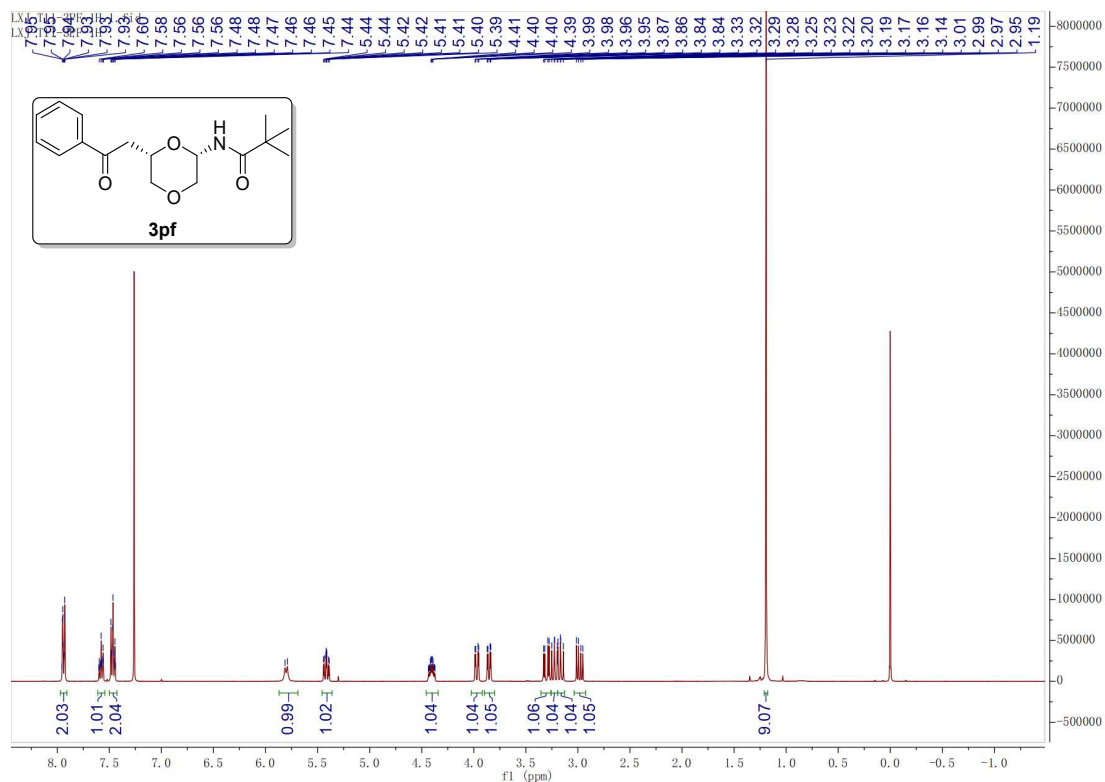

### The <sup>13</sup>C NMR spectrum of 3pf (101 MHz, CDCl<sub>3</sub>)

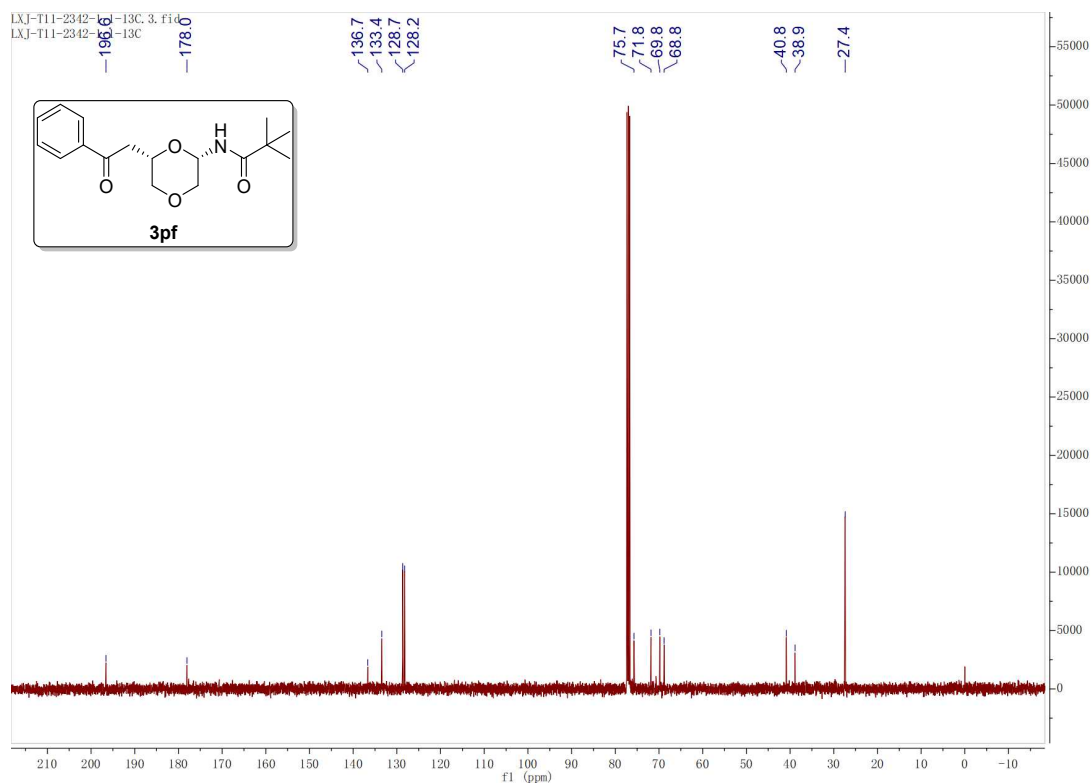

### The HPLC of racemic 3pf

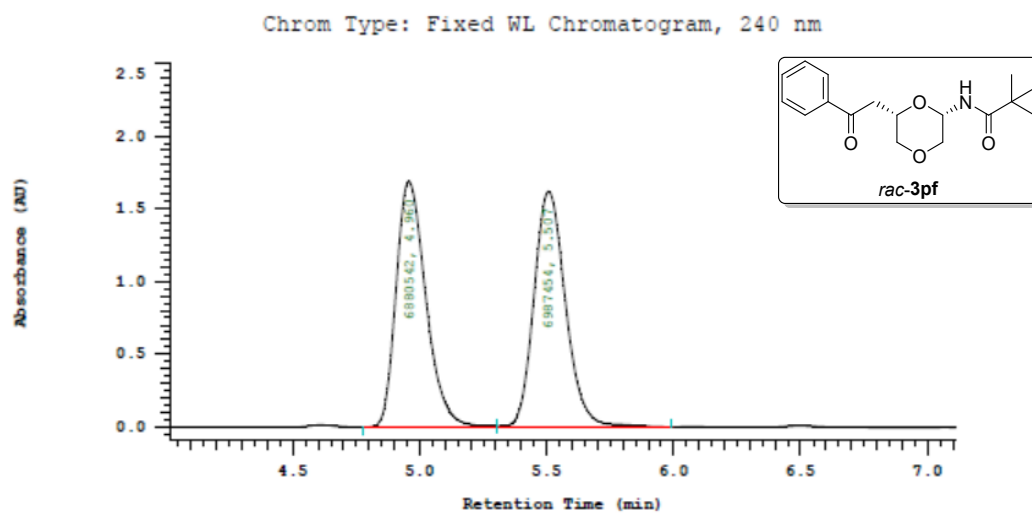

Chrom Type: Fixed WL Chromatogram, 240 nm

Peak Quantitation: AREA  
Calculation Method: AREA%

| No. | RT    | Area     | Area %  | BC |
|-----|-------|----------|---------|----|
| 1   | 4.960 | 6880542  | 49.615  | BV |
| 2   | 5.507 | 6987454  | 50.385  | VB |
|     |       | 13867996 | 100.000 |    |

## The HPLC of chiral 3pf

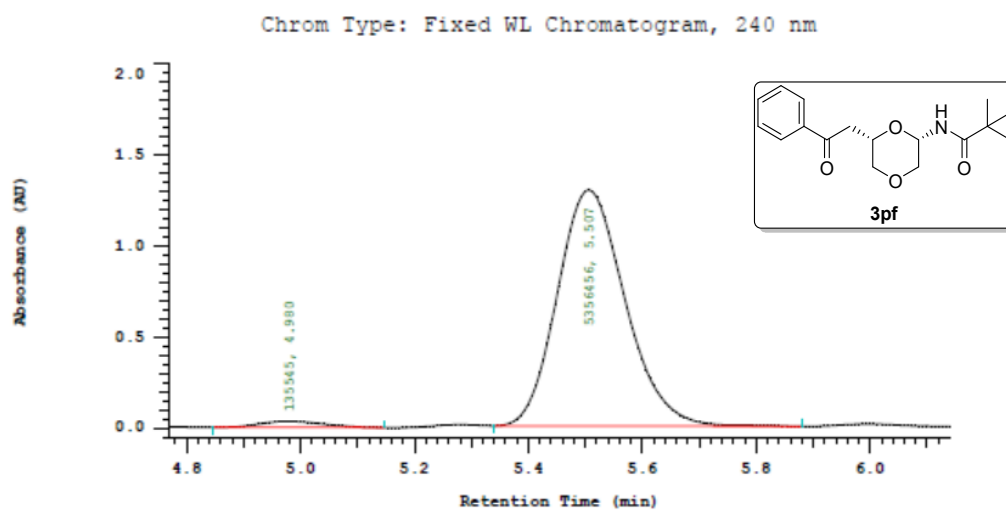

Chrom Type: Fixed WL Chromatogram, 240 nm  
Peak Quantitation: AREA  
Calculation Method: AREA%

| No. | RT    | Area    | Area %  | BC |
|-----|-------|---------|---------|----|
| 1   | 4.980 | 135545  | 2.468   | BB |
| 2   | 5.507 | 5356456 | 97.532  | BB |
|     |       | 5492001 | 100.000 |    |

## The <sup>1</sup>H NMR spectrum of 5 (400 MHz, CDCl<sub>3</sub>)

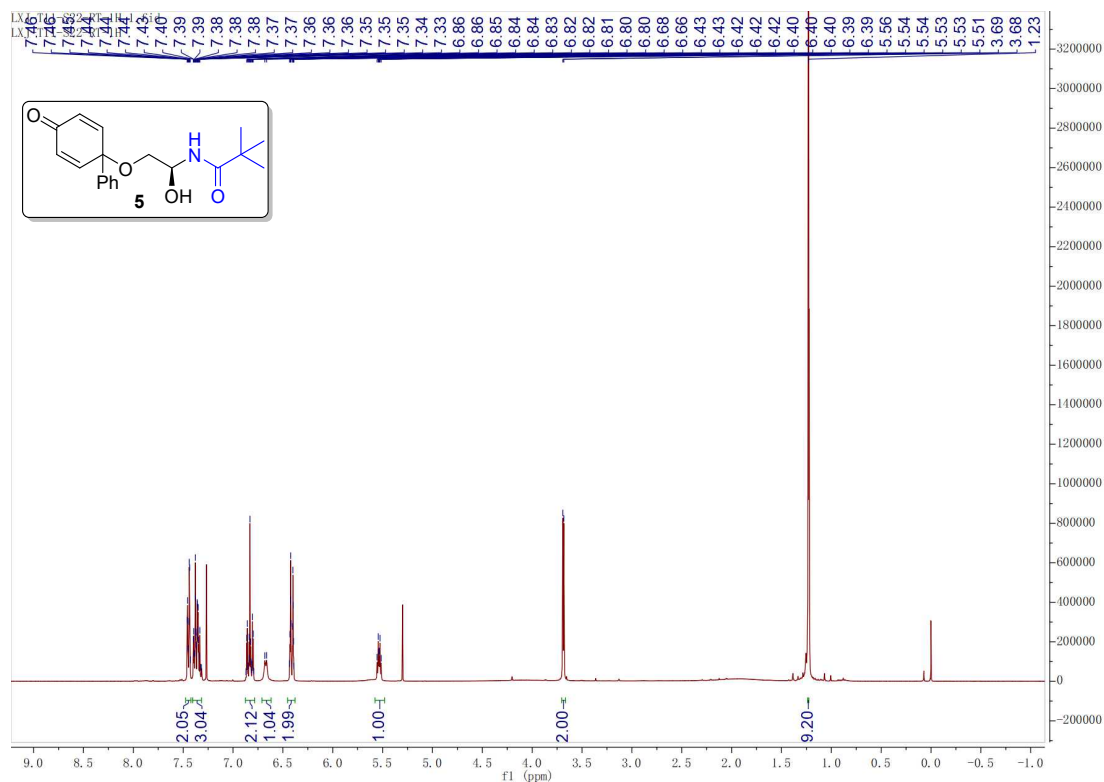

## The <sup>13</sup>C NMR spectrum of 5 (101 MHz, CDCl<sub>3</sub>)

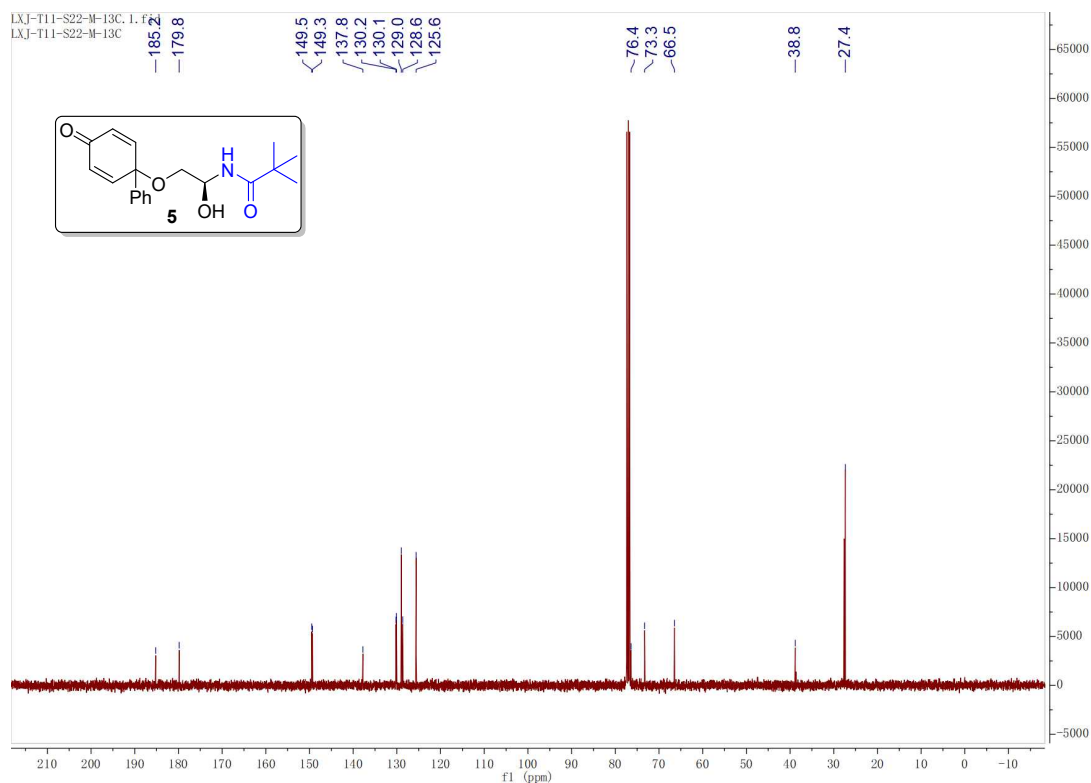

## The HPLC of racemic 5

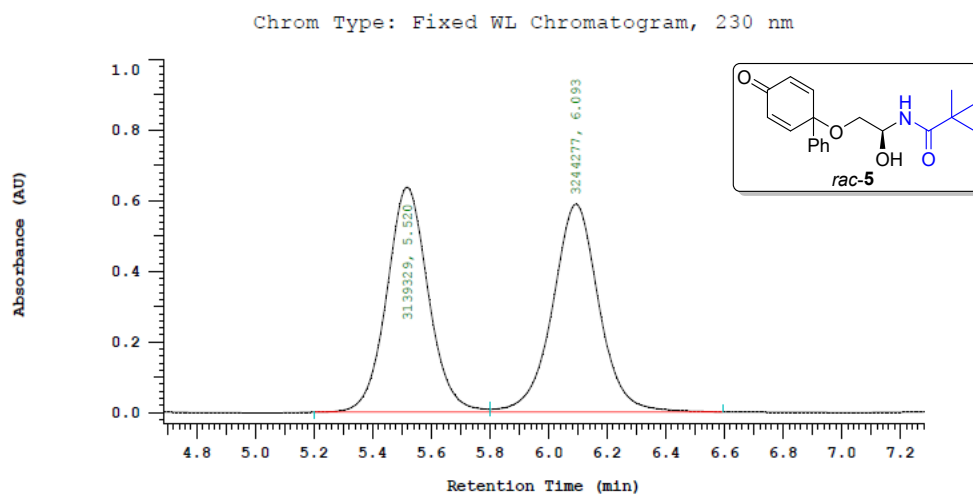

Chrom Type: Fixed WL Chromatogram, 230 nm

Peak Quantitation: AREA  
Calculation Method: AREA%

| No. | RT    | Area    | Area %  | BC |
|-----|-------|---------|---------|----|
| 1   | 5.520 | 3139329 | 49.178  | BV |
| 2   | 6.093 | 3244277 | 50.822  | VB |
|     |       | 6383606 | 100.000 |    |



## The HPLC of chiral 5 (catalyzed by A2)

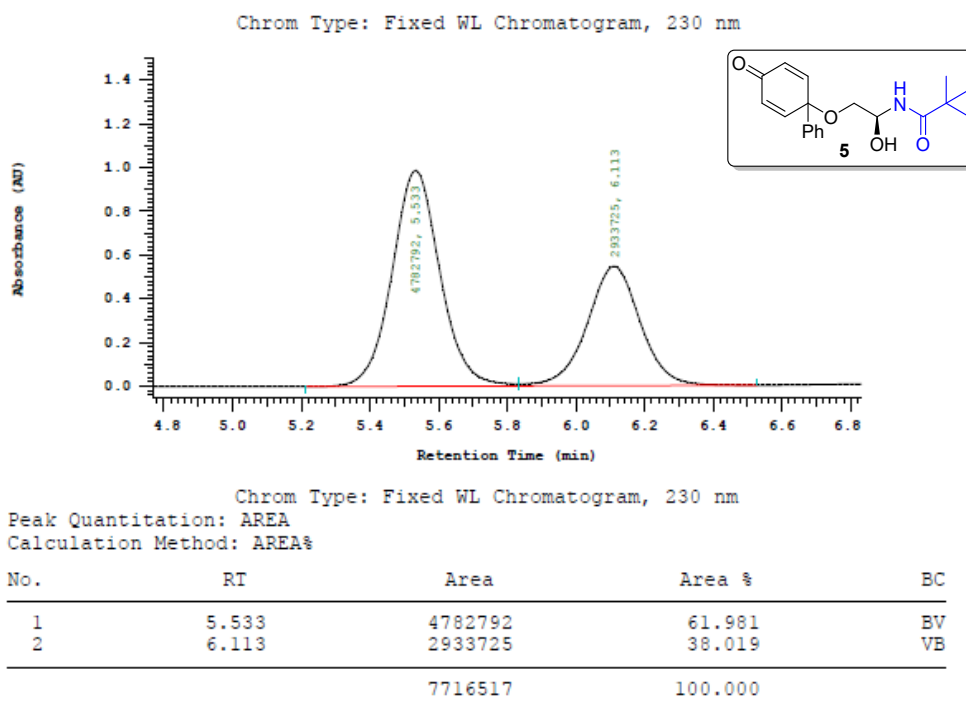

## The HPLC of chiral 5 (catalyzed by B3)

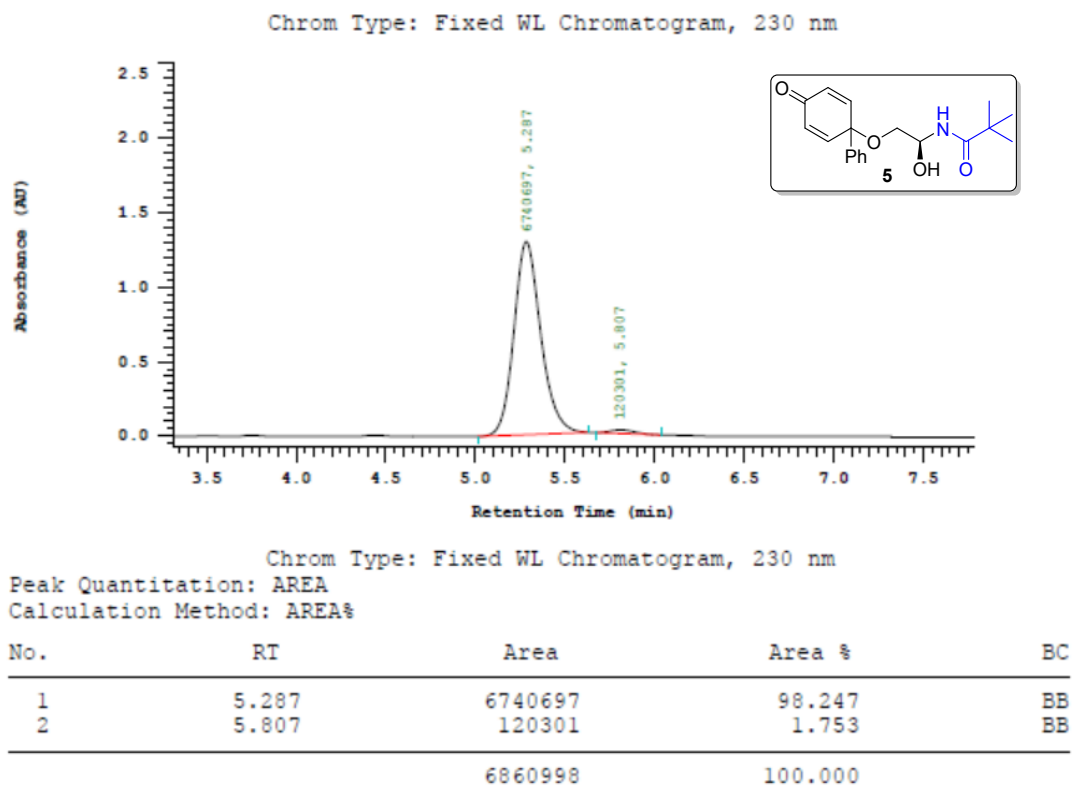

### The <sup>1</sup>H NMR spectrum of 6 (400 MHz, CDCl<sub>3</sub>)

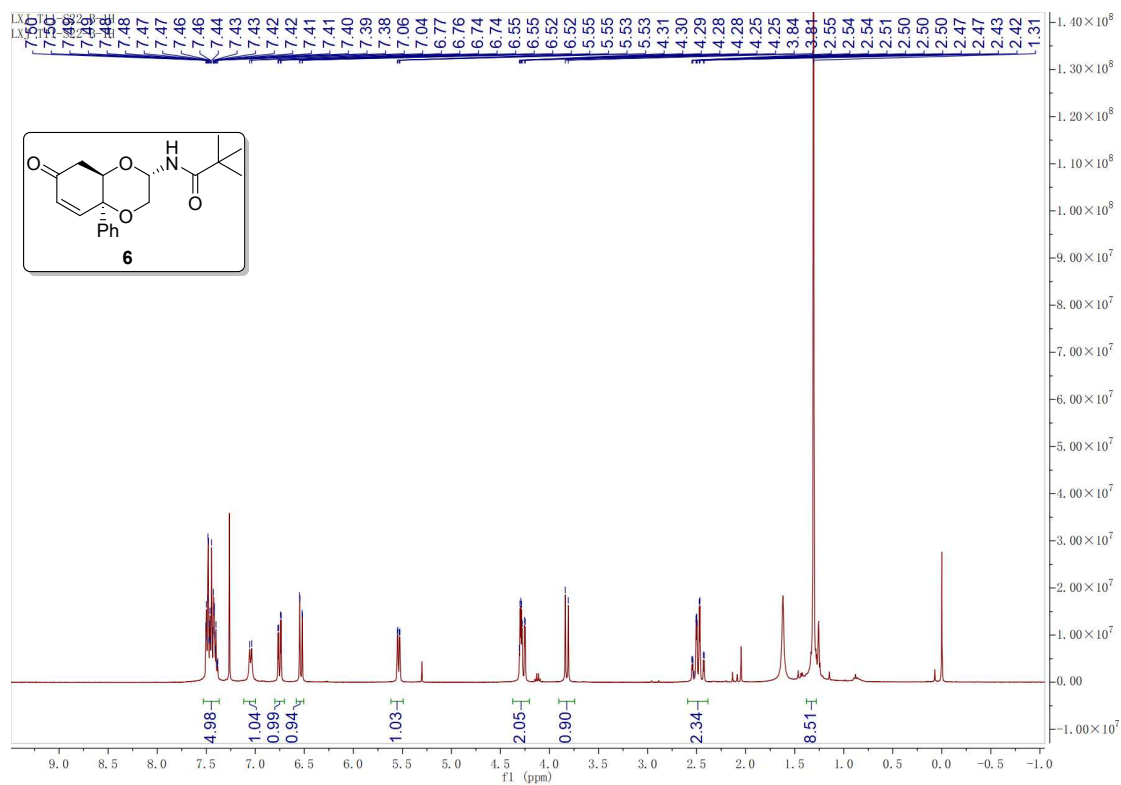

### The <sup>13</sup>C NMR spectrum of 6 (125 MHz, CDCl<sub>3</sub>)

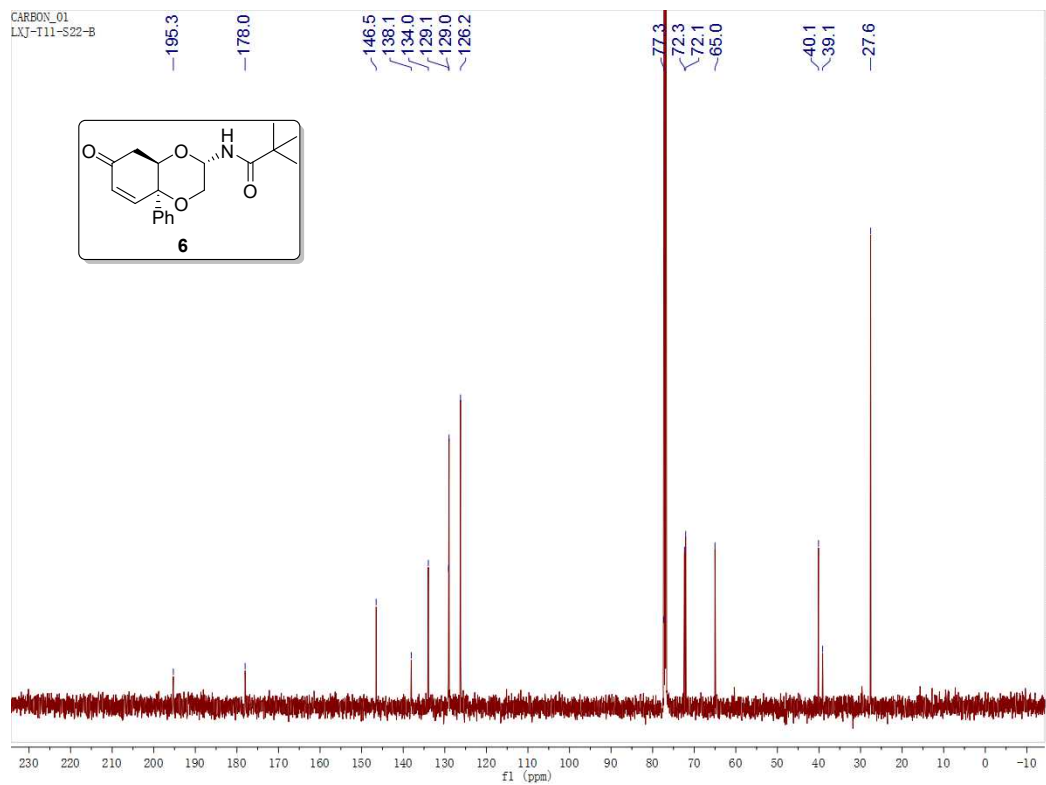

## The noesy spectrum of 6 (500 MHz, CDCl<sub>3</sub>)

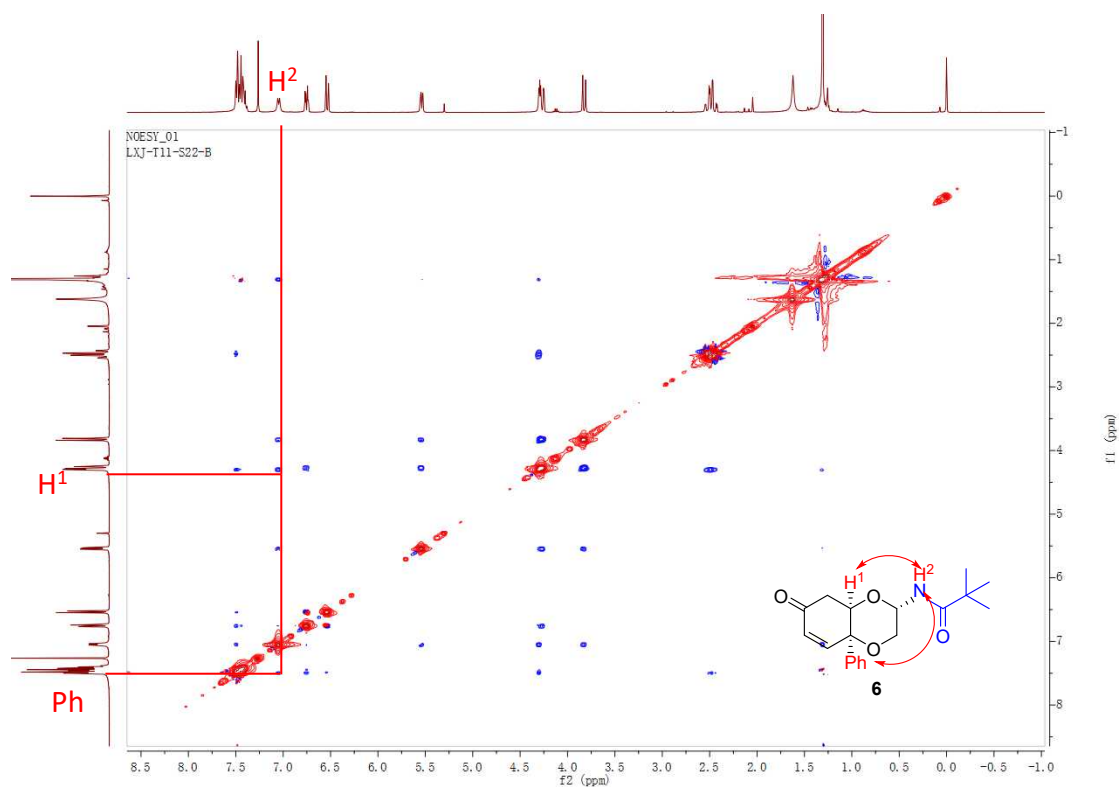

## The HPLC of racemic 6

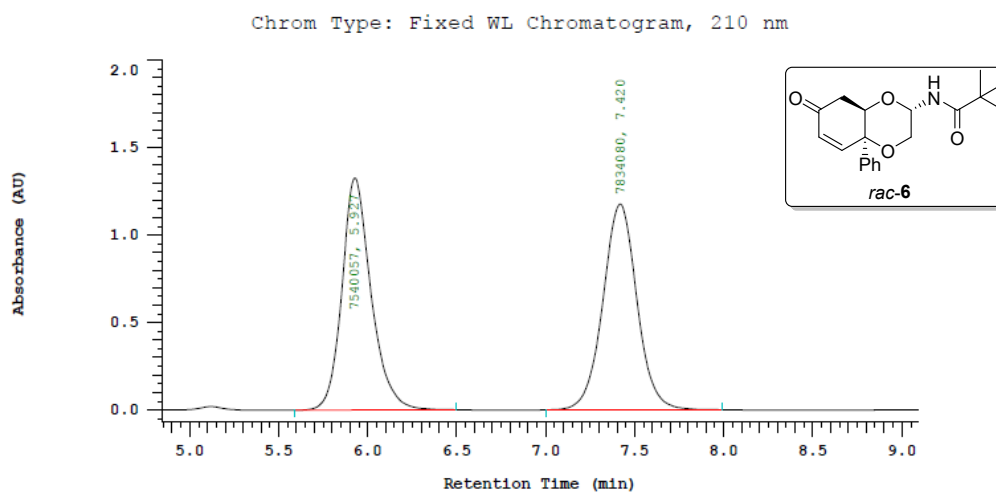

Chrom Type: Fixed WL Chromatogram, 210 nm

Peak Quantitation: AREA  
Calculation Method: AREA%

| No. | RT    | Area     | Area %  | BC |
|-----|-------|----------|---------|----|
| 1   | 5.927 | 7540057  | 49.044  | BB |
| 2   | 7.420 | 7834080  | 50.956  | BB |
|     |       | 15374137 | 100.000 |    |

## The HPLC of chiral 6

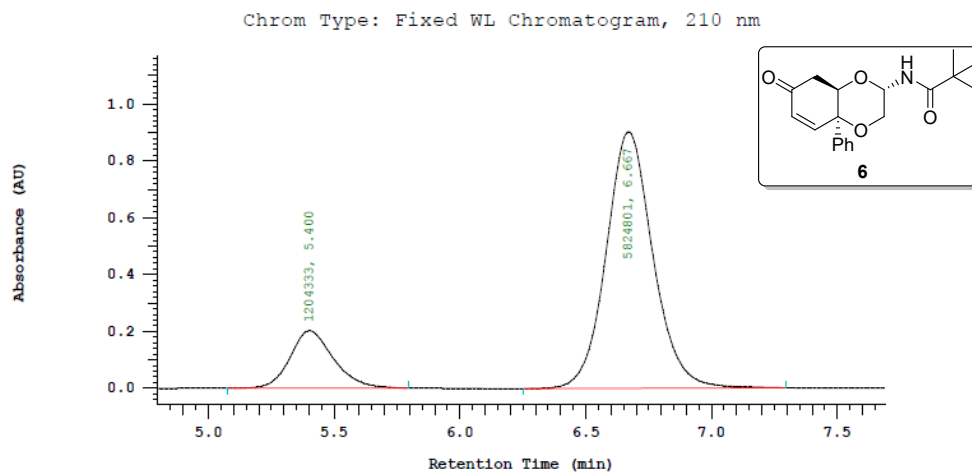

Chrom Type: Fixed WL Chromatogram, 210 nm  
 Peak Quantitation: AREA  
 Calculation Method: AREA%

| No. | RT    | Area    | Area %  | BC |
|-----|-------|---------|---------|----|
| 1   | 5.400 | 1204333 | 17.133  | BB |
| 2   | 6.667 | 5824801 | 82.867  | BB |
|     |       | 7029134 | 100.000 |    |

## The <sup>1</sup>H NMR spectrum of 7 (400 MHz, CDCl<sub>3</sub>)

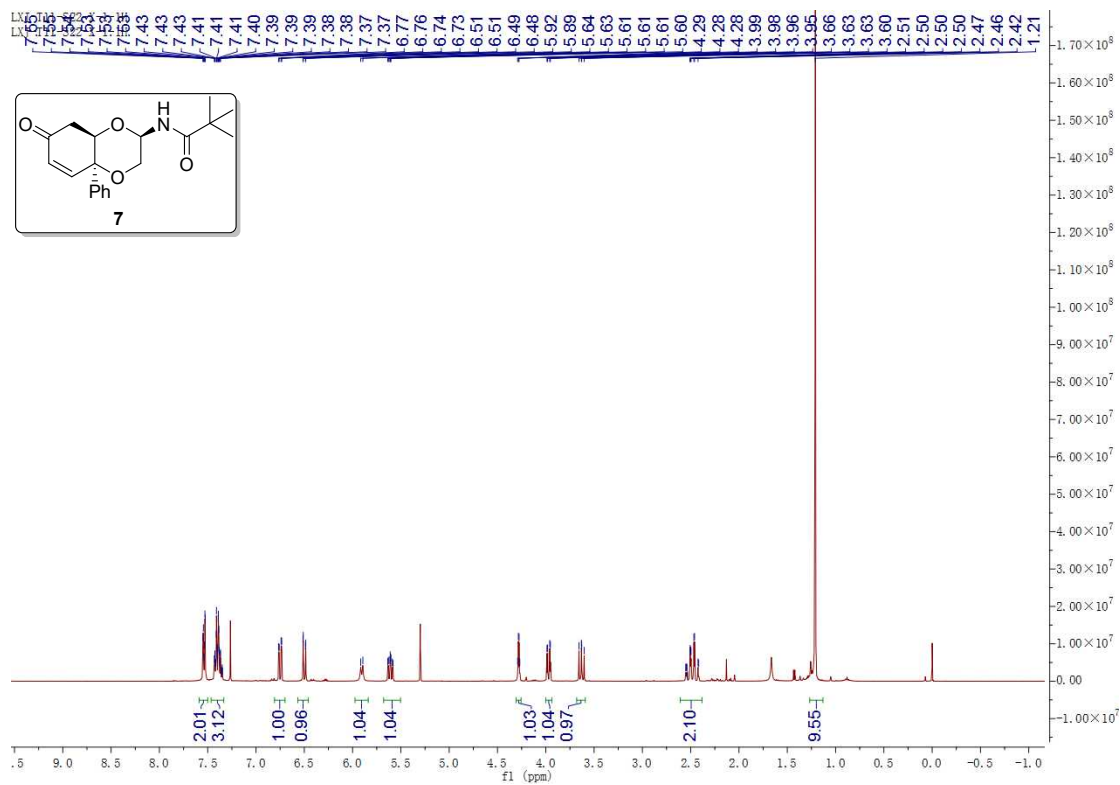

The  $^{13}\text{C}$  NMR spectrum of **7** (400 MHz,  $\text{CDCl}_3$ )

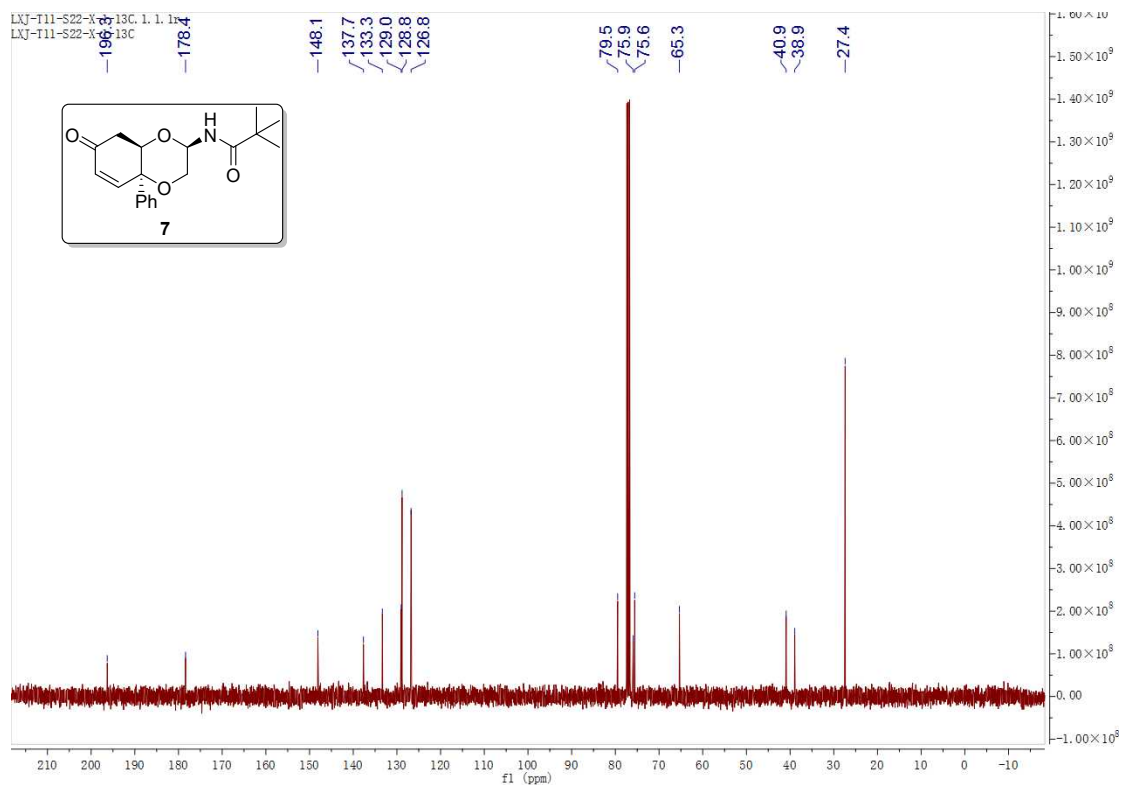

The noesy spectrum of **7** (500 MHz,  $\text{CDCl}_3$ )

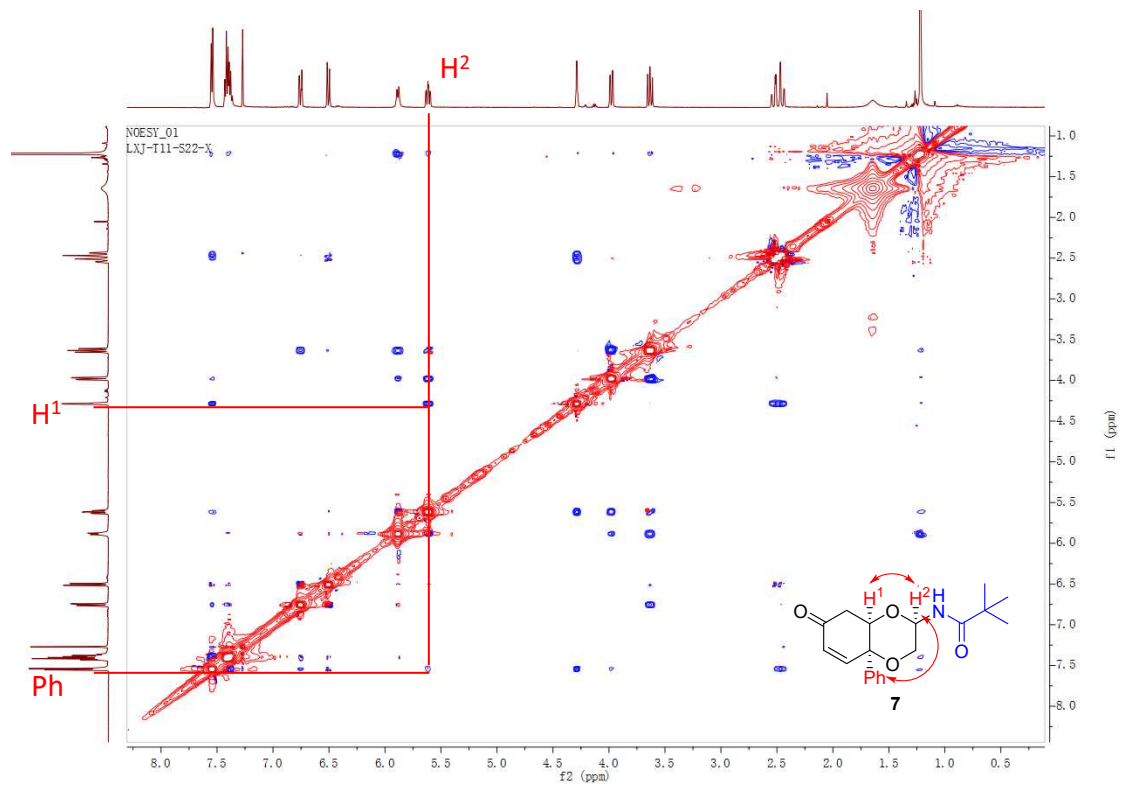

## The HPLC of racemic 7

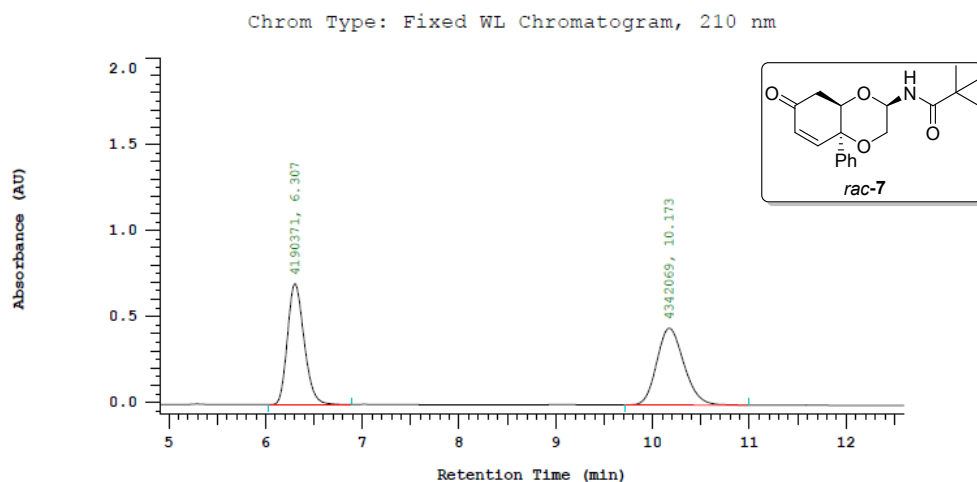

Chrom Type: Fixed WL Chromatogram, 210 nm  
 Peak Quantitation: AREA  
 Calculation Method: AREA%

| No. | RT     | Area    | Area %  | BC |
|-----|--------|---------|---------|----|
| 1   | 6.307  | 4190371 | 49.111  | BB |
| 2   | 10.173 | 4342069 | 50.889  | BB |
|     |        | 8532440 | 100.000 |    |

## The HPLC of chiral 7

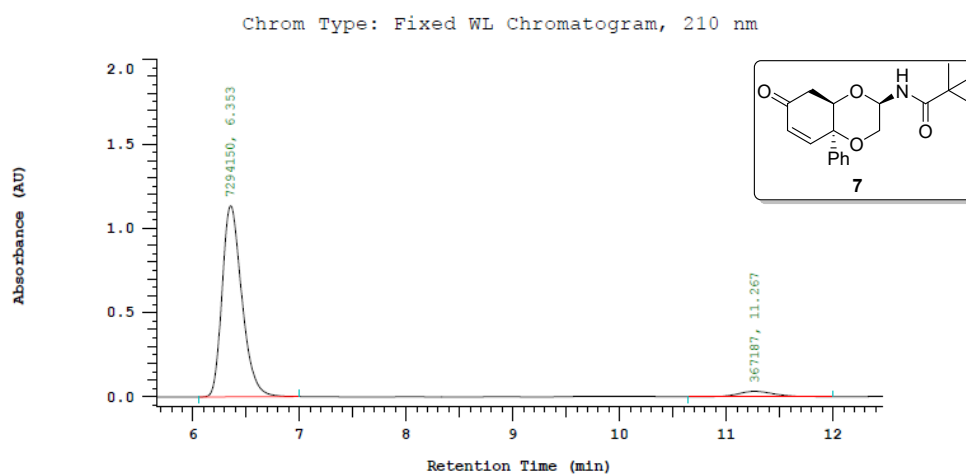

Chrom Type: Fixed WL Chromatogram, 210 nm  
 Peak Quantitation: AREA  
 Calculation Method: AREA%

| No. | RT     | Area    | Area %  | BC |
|-----|--------|---------|---------|----|
| 1   | 6.353  | 7294150 | 95.207  | BB |
| 2   | 11.267 | 367187  | 4.793   | BB |
|     |        | 7661337 | 100.000 |    |

### The <sup>1</sup>H NMR spectrum of 8 (400 MHz, CDCl<sub>3</sub>)

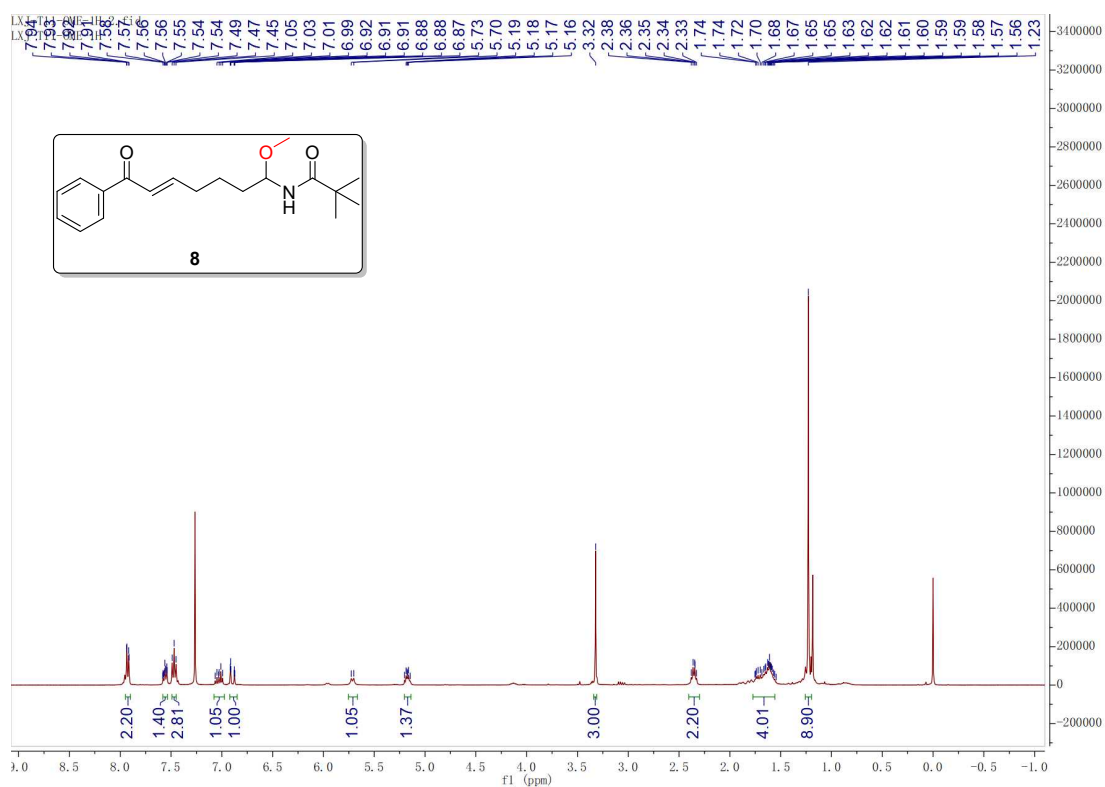

### The <sup>13</sup>C NMR spectrum of 8 (101 MHz, CDCl<sub>3</sub>)

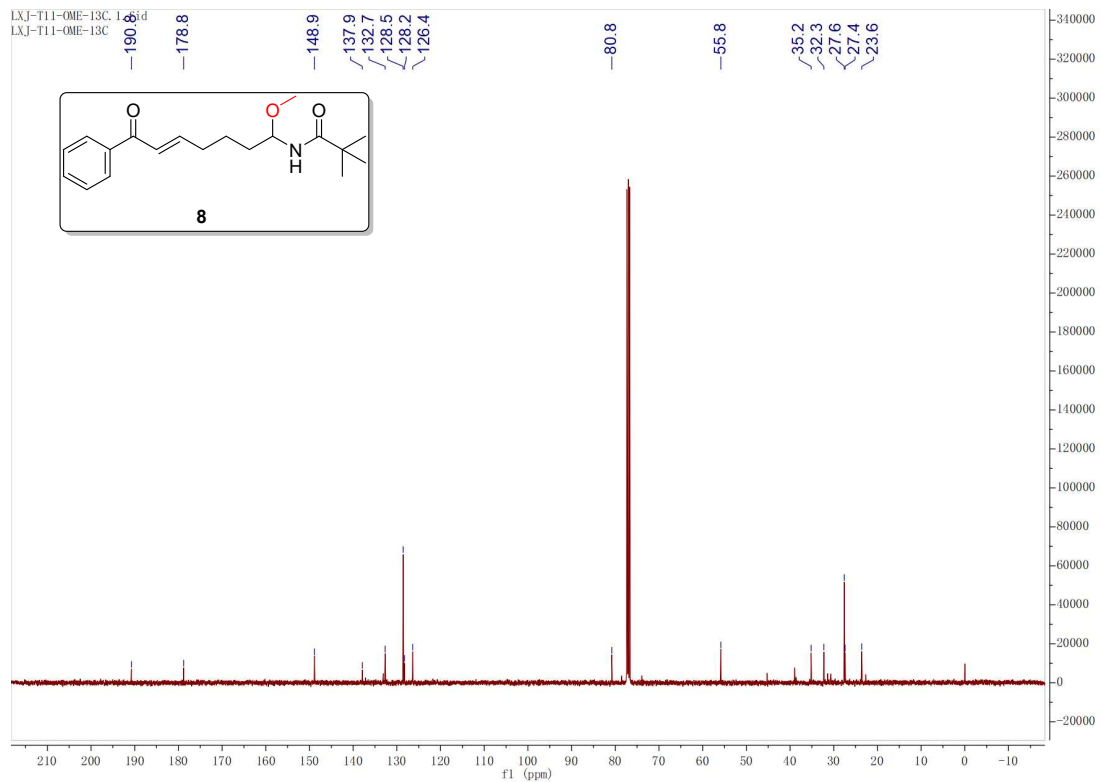

### The <sup>1</sup>H NMR spectrum of 10 (500 MHz, CDCl<sub>3</sub>)

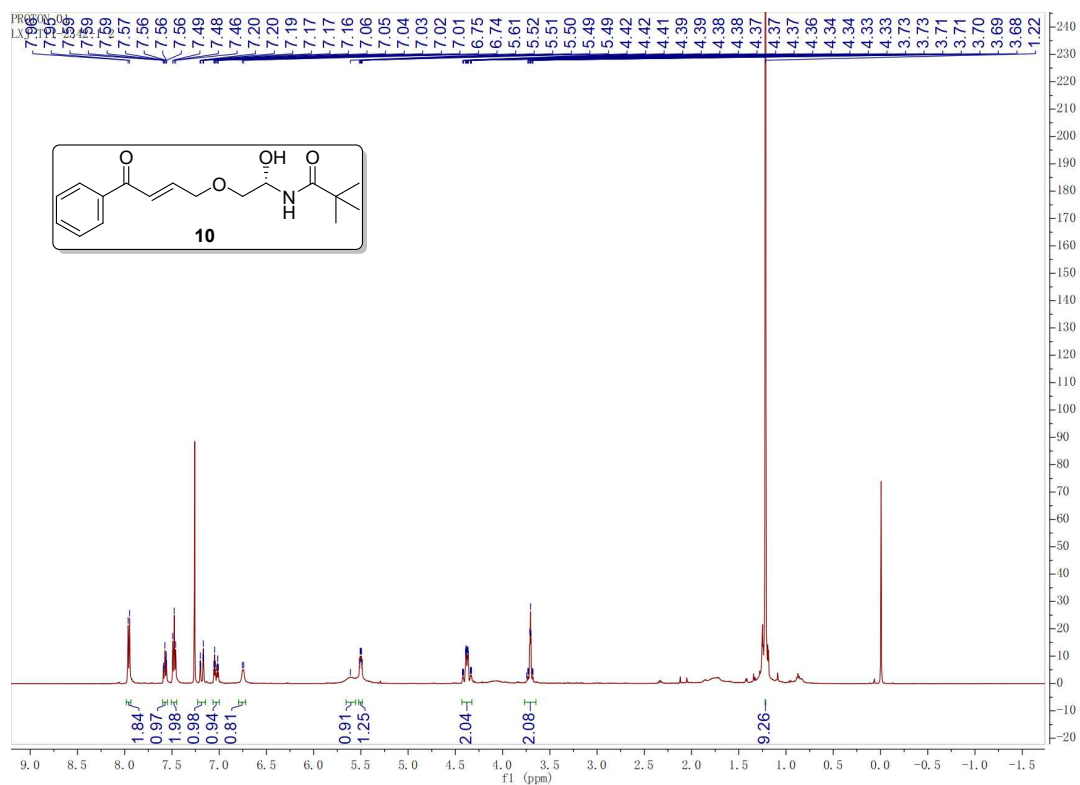

### The <sup>13</sup>C NMR spectrum of 10 (101 MHz, CDCl<sub>3</sub>)

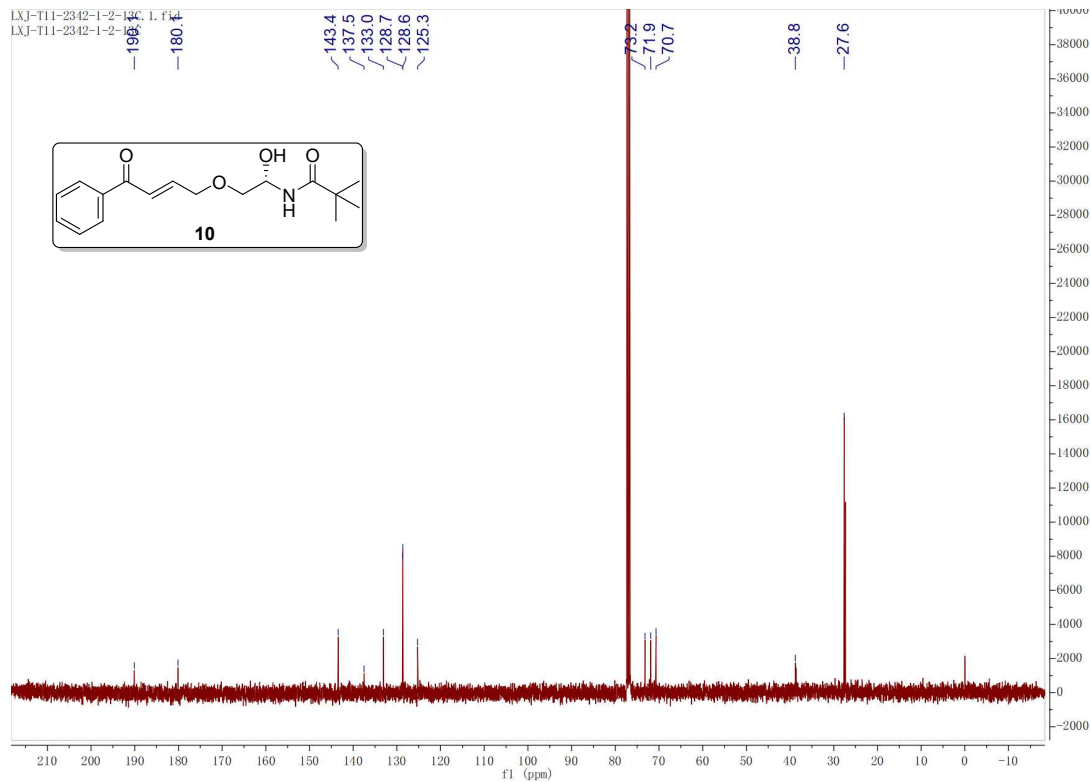



## The HPLC of racemic 10

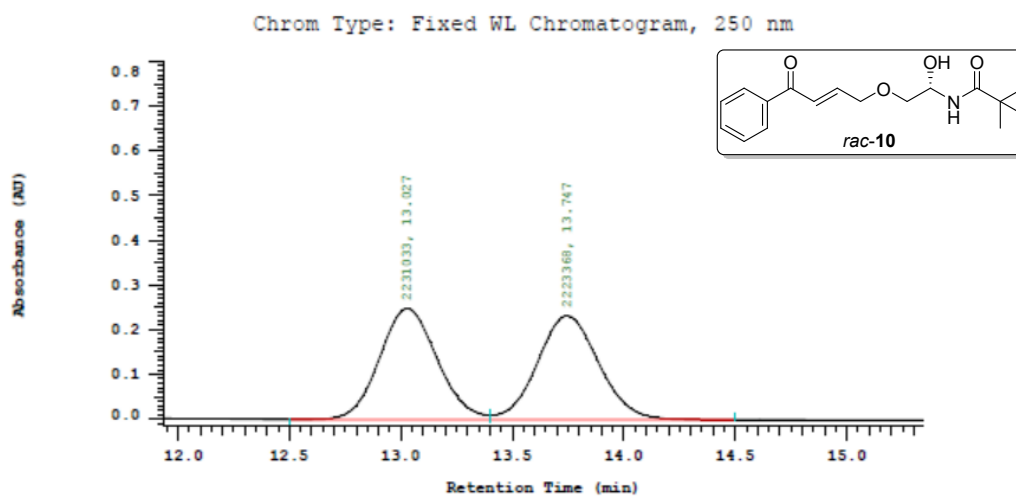

Chrom Type: Fixed WL Chromatogram, 250 nm  
 Peak Quantitation: AREA  
 Calculation Method: AREA%

| No. | RT     | Area    | Area %  | BC |
|-----|--------|---------|---------|----|
| 1   | 13.027 | 2231033 | 50.086  | BV |
| 2   | 13.747 | 2223368 | 49.914  | VB |
|     |        | 4454401 | 100.000 |    |

## The HPLC of chiral 10

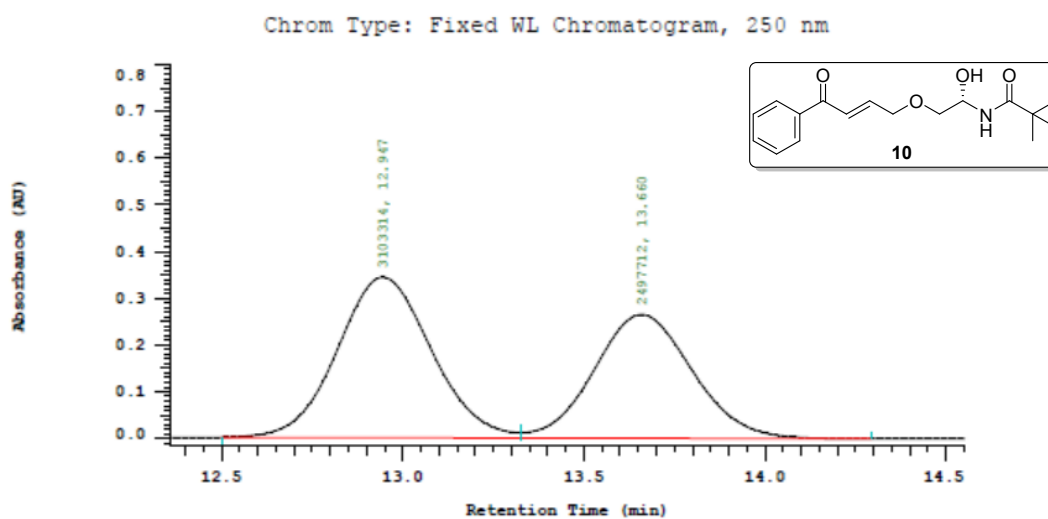

Chrom Type: Fixed WL Chromatogram, 250 nm  
 Peak Quantitation: AREA  
 Calculation Method: AREA%

| No. | RT     | Area    | Area %  | BC |
|-----|--------|---------|---------|----|
| 1   | 12.947 | 3103314 | 55.406  | BV |
| 2   | 13.660 | 2497712 | 44.594  | VB |
|     |        | 5601026 | 100.000 |    |

## The HPLC of chiral *ent*-10

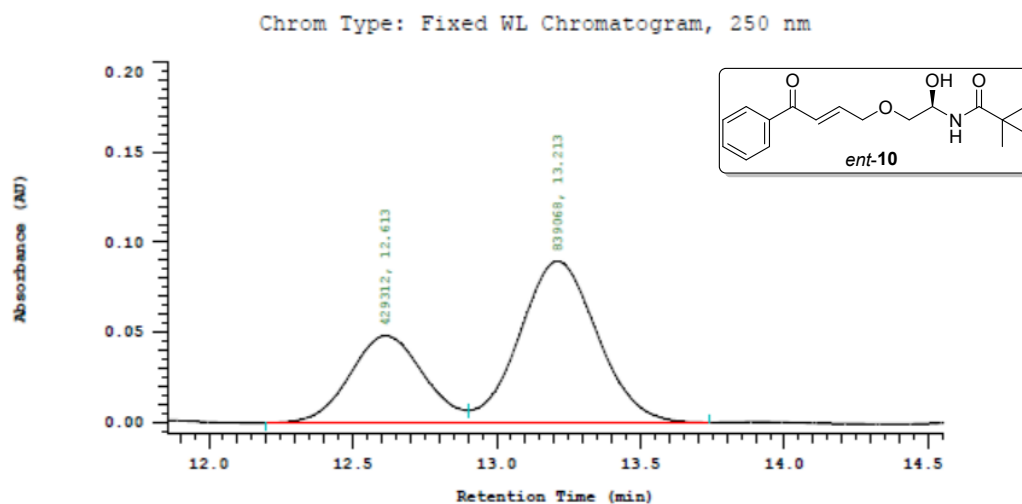

Chrom Type: Fixed WL Chromatogram, 250 nm

Peak Quantitation: AREA  
Calculation Method: AREA%

| No. | RT     | Area    | Area %  | BC |
|-----|--------|---------|---------|----|
| 1   | 12.613 | 429312  | 33.847  | BV |
| 2   | 13.213 | 839068  | 66.153  | VB |
|     |        | 1268380 | 100.000 |    |

## The <sup>1</sup>H NMR spectrum of 12 (400 MHz, CDCl<sub>3</sub>)

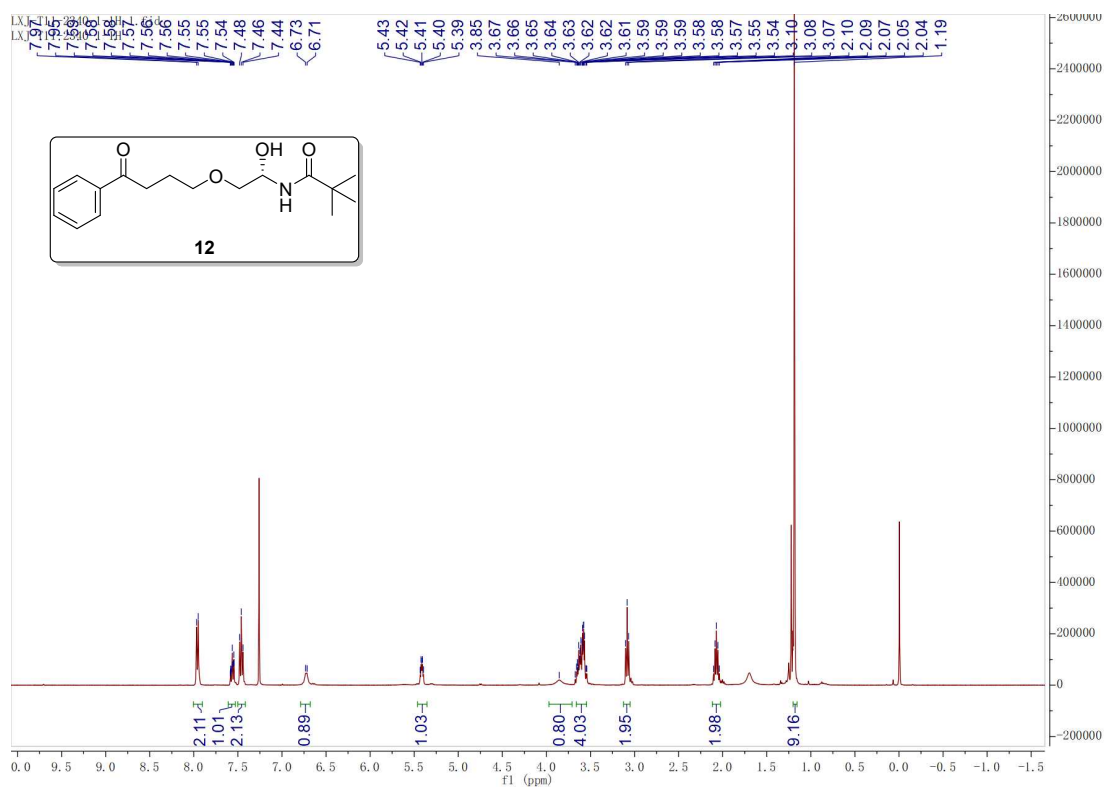

### The <sup>13</sup>C NMR spectrum of 12 (101 MHz, CDCl<sub>3</sub>)

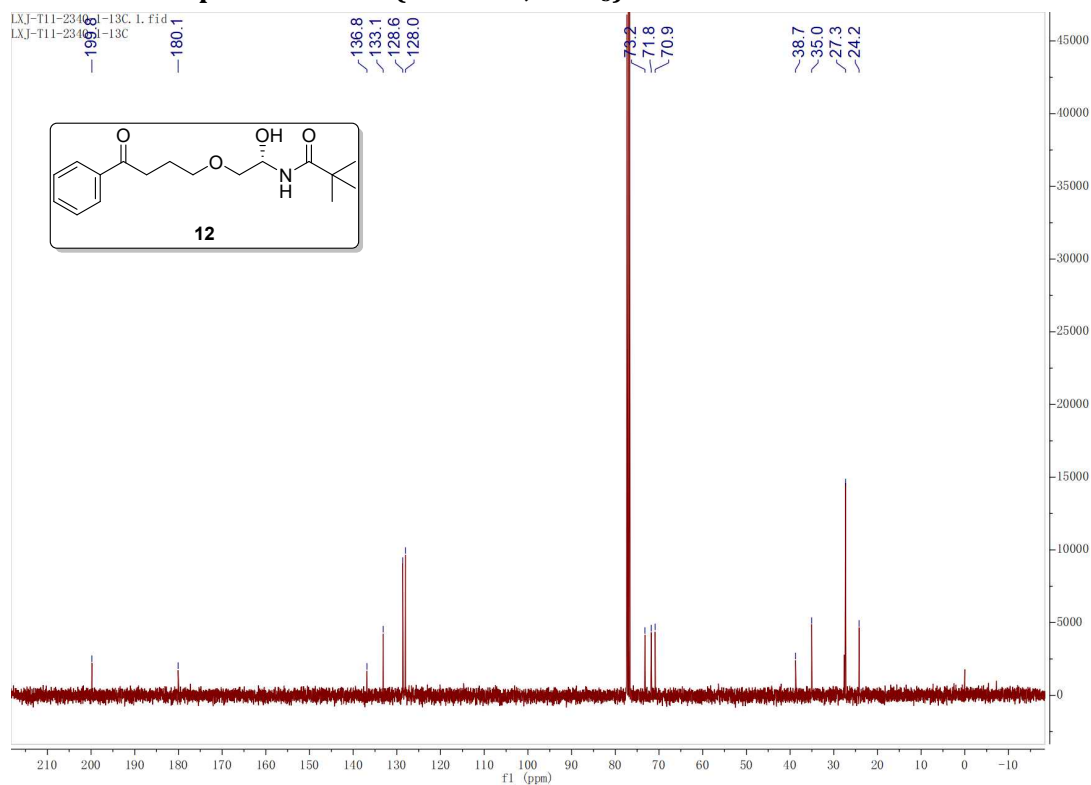

### The HPLC of racemic 12

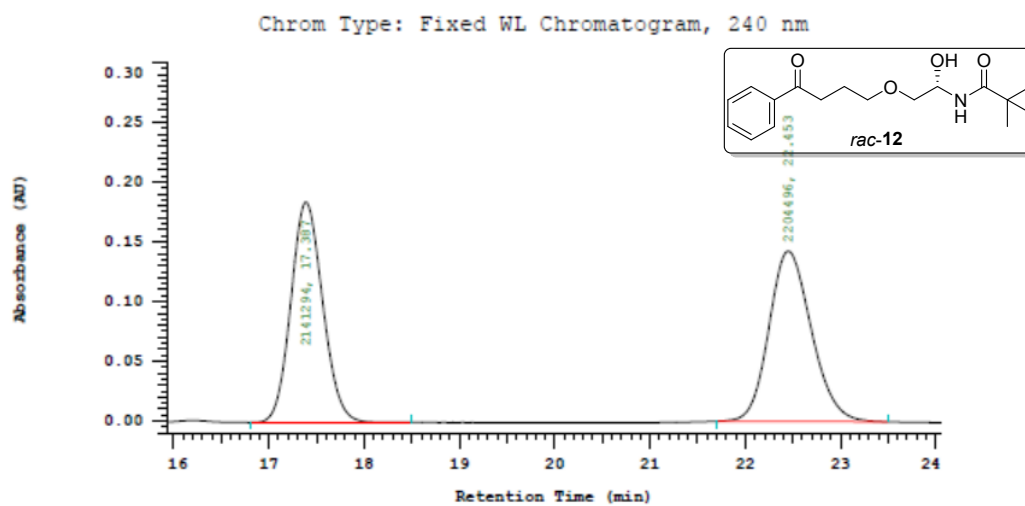

Chrom Type: Fixed WL Chromatogram, 240 nm

Peak Quantitation: AREA  
Calculation Method: AREA%

| No. | RT     | Area    | Area %  | BC |
|-----|--------|---------|---------|----|
| 1   | 17.387 | 2141294 | 49.273  | BB |
| 2   | 22.453 | 2204496 | 50.727  | BB |
|     |        | 4345790 | 100.000 |    |

## The HPLC of chiral 12

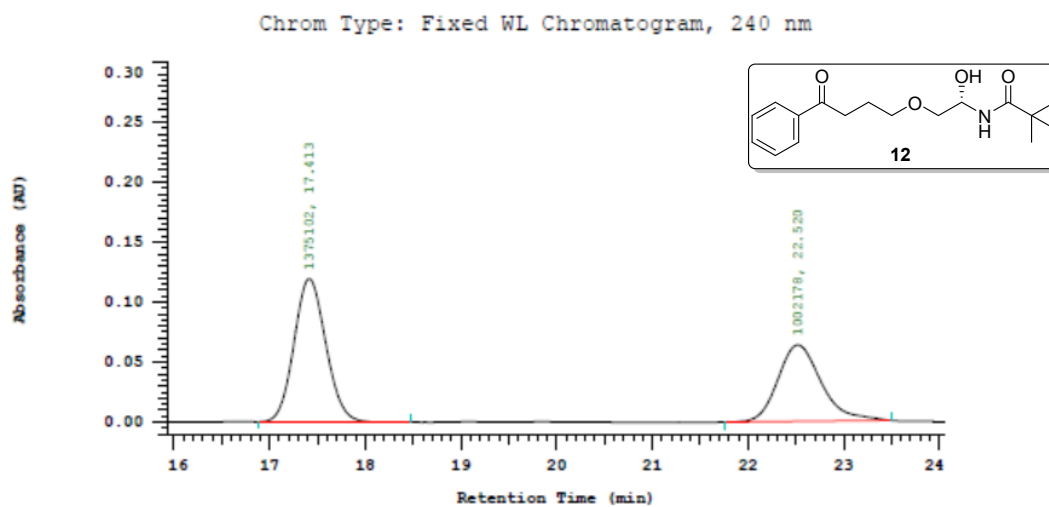

Chrom Type: Fixed WL Chromatogram, 240 nm  
 Peak Quantitation: AREA  
 Calculation Method: AREA%

| No. | RT     | Area    | Area %  | BC |
|-----|--------|---------|---------|----|
| 1   | 17.413 | 1375102 | 57.843  | BB |
| 2   | 22.520 | 1002178 | 42.157  | BB |
|     |        | 2377280 | 100.000 |    |

## The <sup>1</sup>H NMR spectrum of 13 (400 MHz, CDCl<sub>3</sub>)

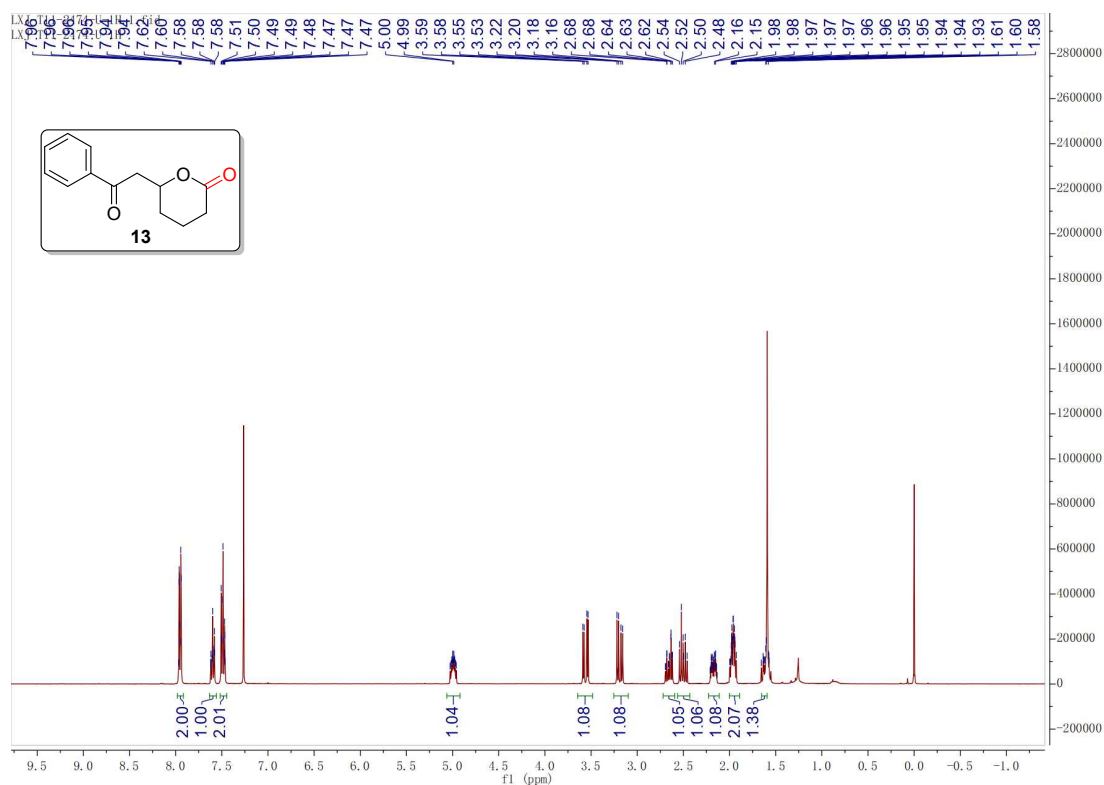

### The $^{13}\text{C}$ NMR spectrum of **13** (101 MHz, $\text{CDCl}_3$ )

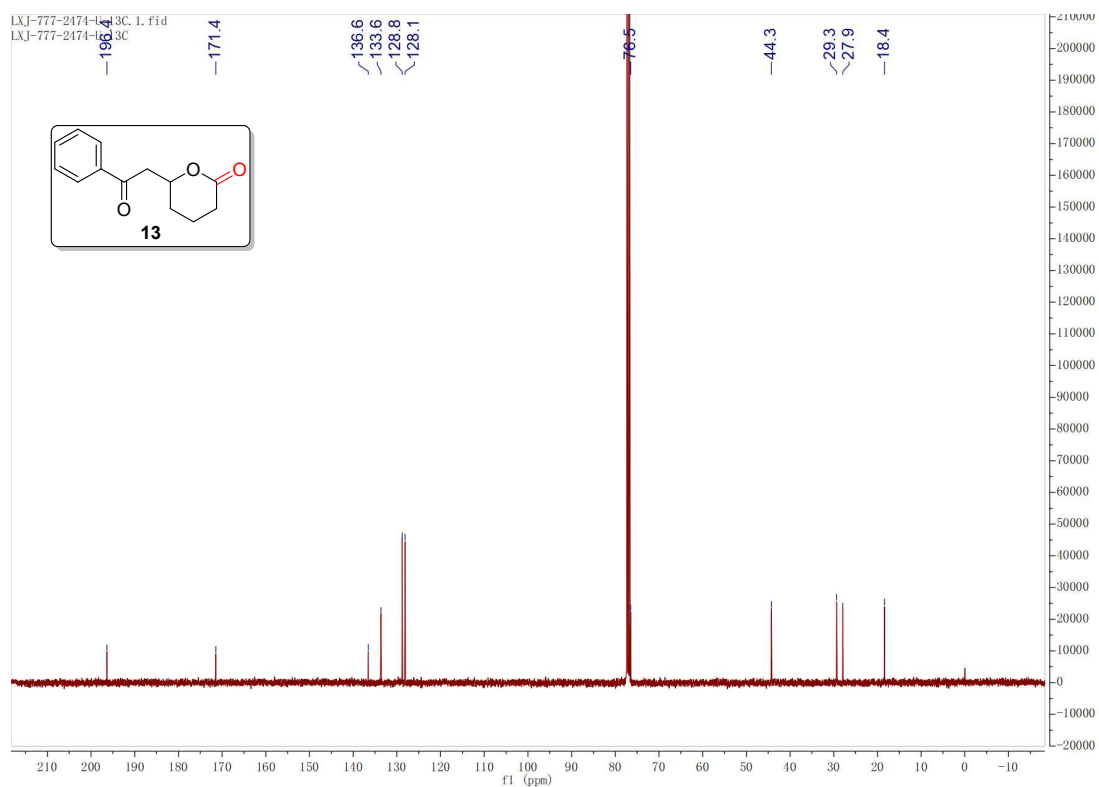

### The $^1\text{H}$ NMR spectrum of ( $\pm$ )-**14** (400 MHz, $\text{CDCl}_3$ )

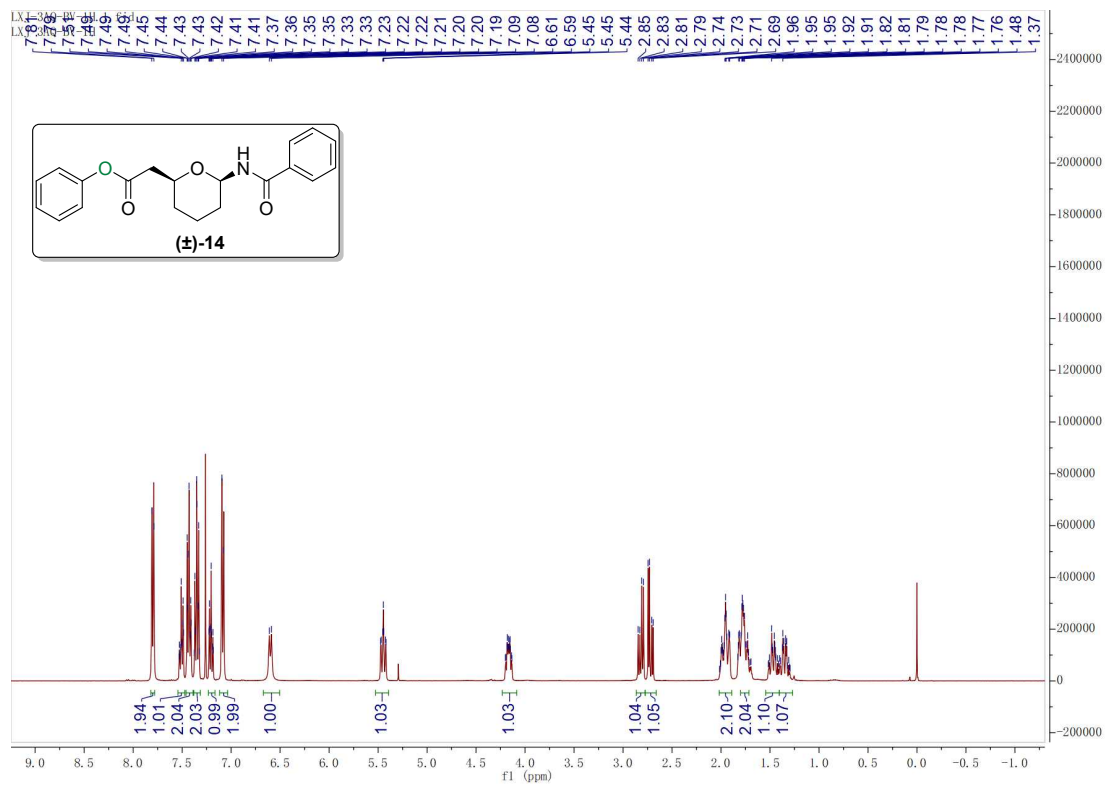

The  $^{13}\text{C}$  NMR spectrum of ( $\pm$ )-14 (101 MHz,  $\text{CDCl}_3$ )

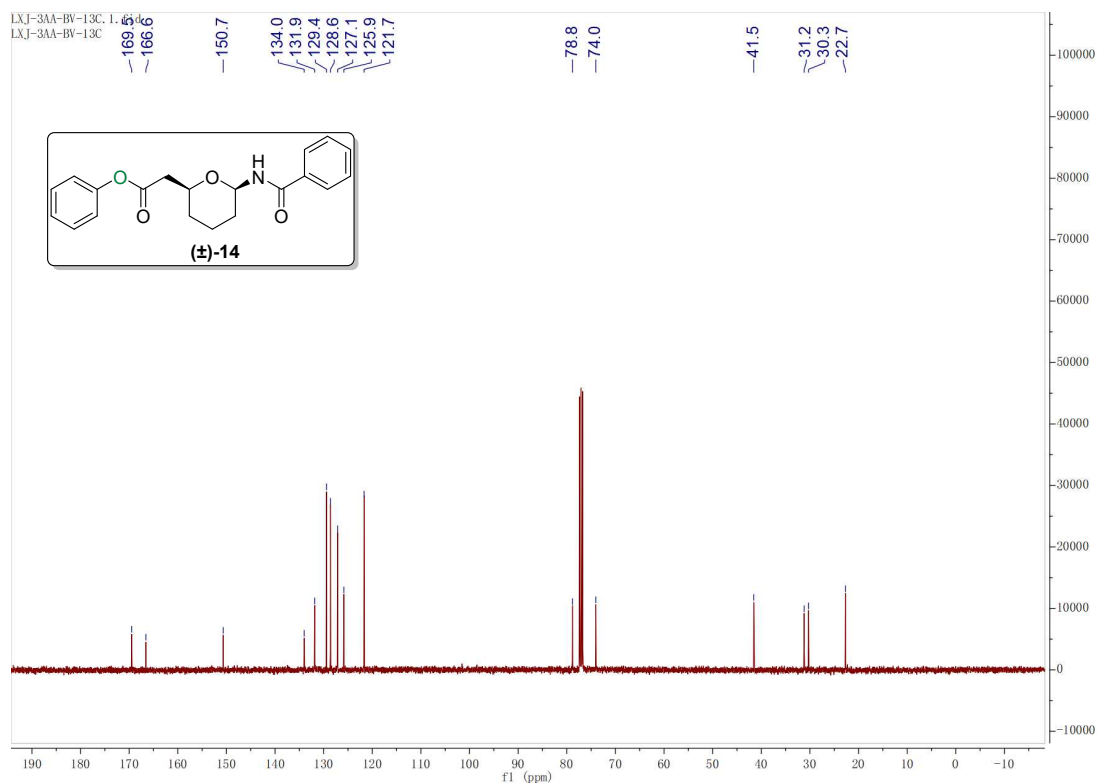

The  $^1\text{H}$  NMR spectrum of 15 (400 MHz,  $\text{CDCl}_3$ )

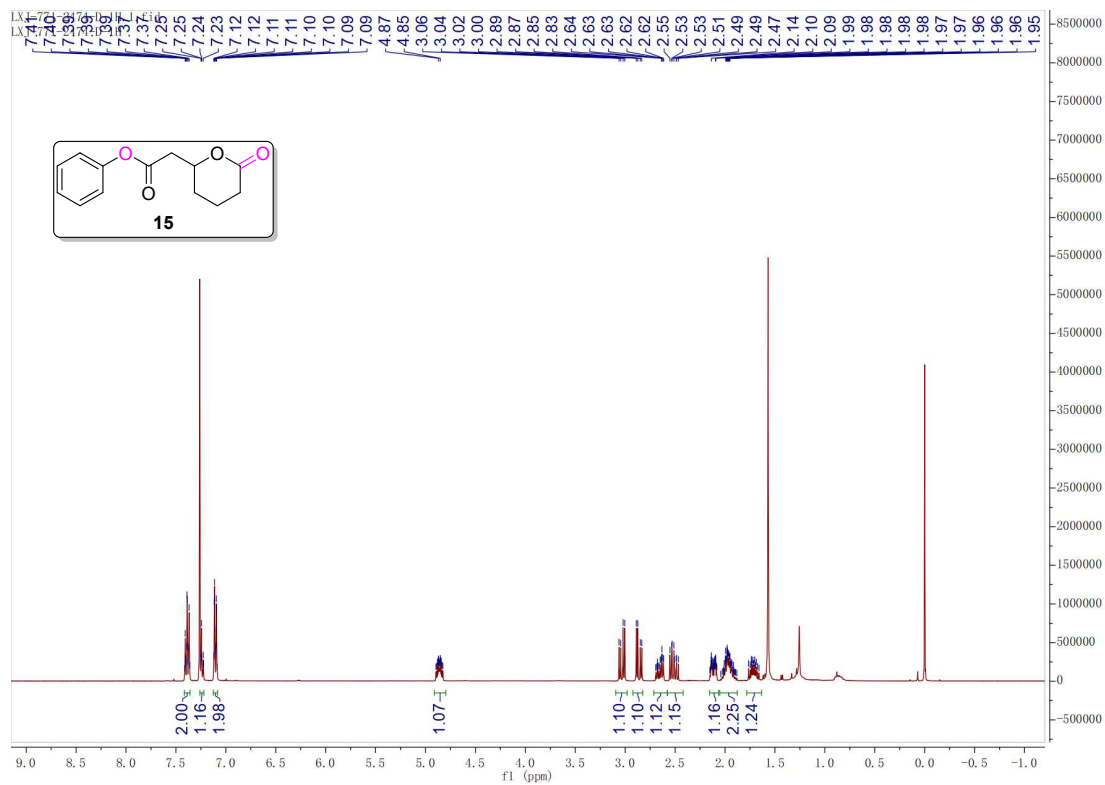

### The $^{13}\text{C}$ NMR spectrum of 15 (101 MHz, $\text{CDCl}_3$ )

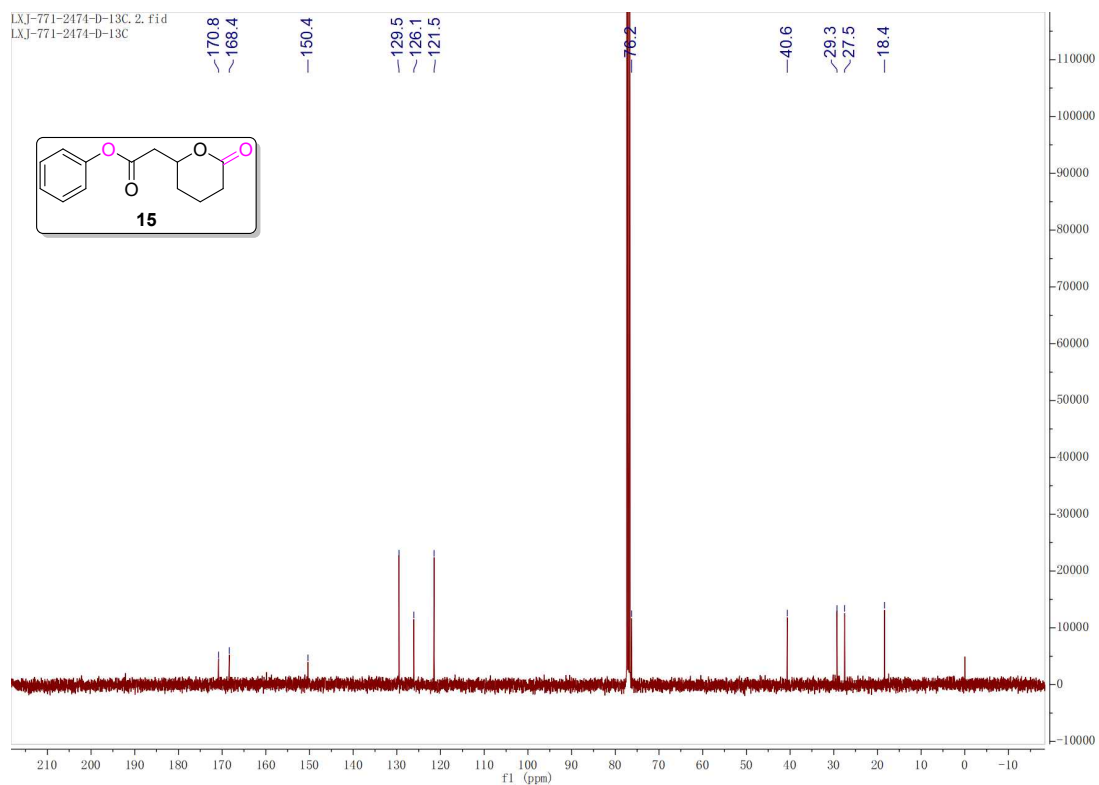

### The $^1\text{H}$ NMR spectrum of 16 (400 MHz, $\text{CDCl}_3$ )

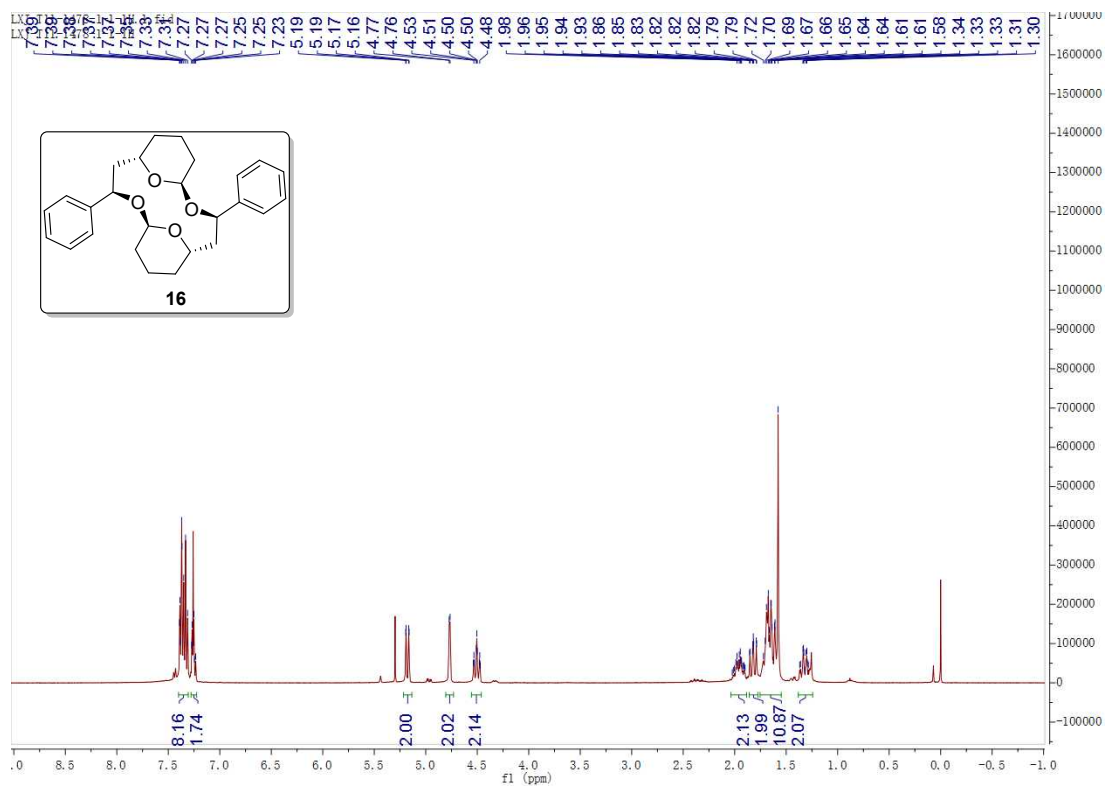

### The <sup>13</sup>C NMR spectrum of 16 (101 MHz, CDCl<sub>3</sub>)

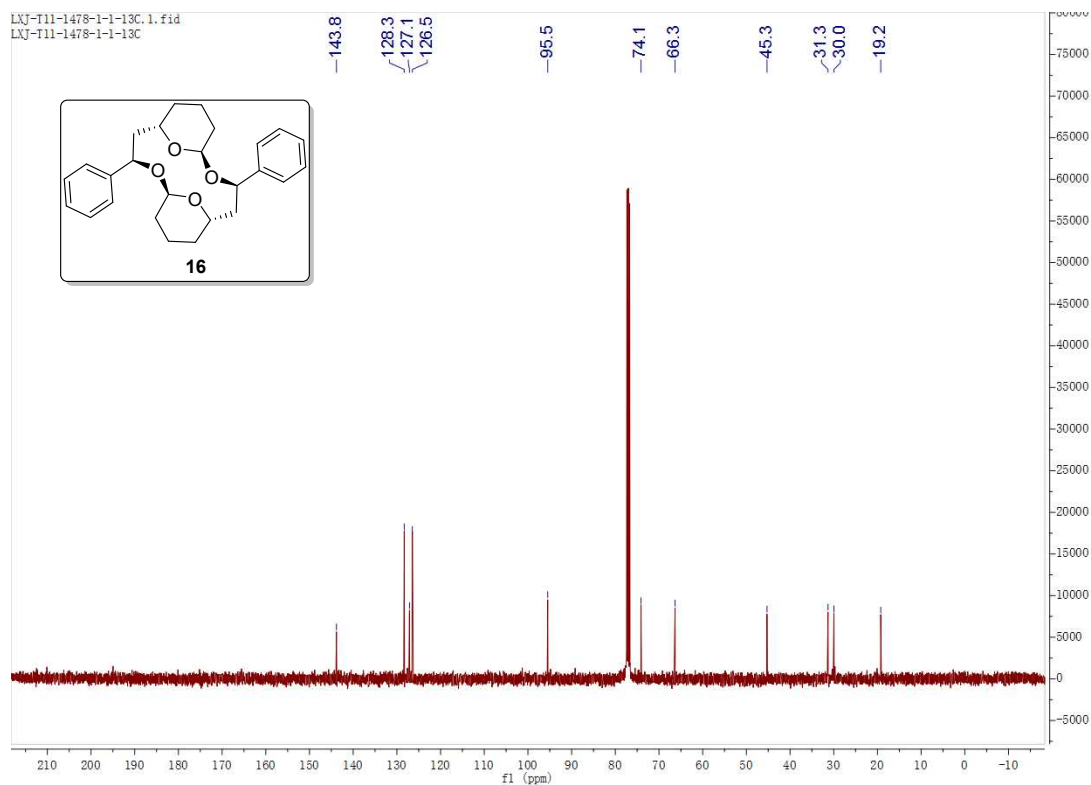

### The HPLC of racemic 16

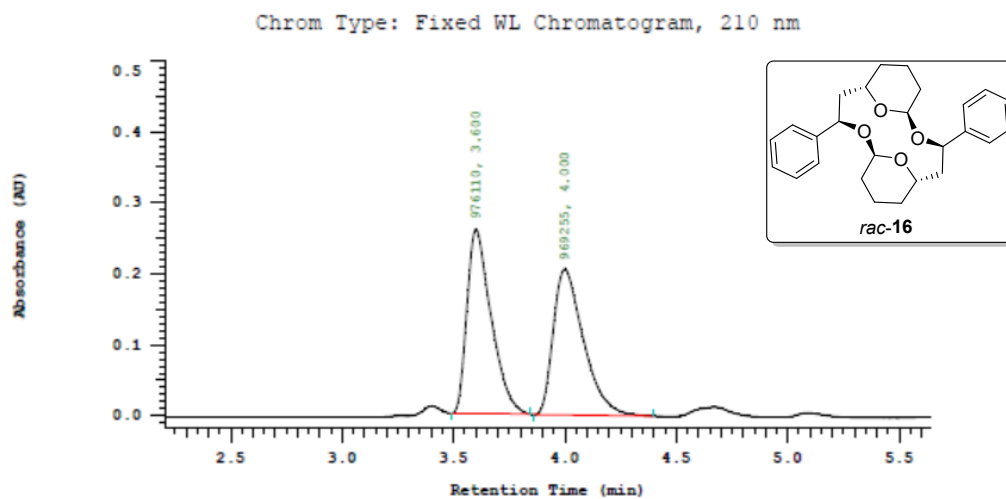

Chrom Type: Fixed WL Chromatogram, 210 nm  
Peak Quantitation: AREA  
Calculation Method: AREA%

| No. | RT    | Area    | Area %  | BC |
|-----|-------|---------|---------|----|
| 1   | 3.600 | 976110  | 50.176  | BB |
| 2   | 4.000 | 969255  | 49.824  | BB |
|     |       | 1945365 | 100.000 |    |





### The <sup>13</sup>C NMR spectrum of 17 (101 MHz, CDCl<sub>3</sub>)

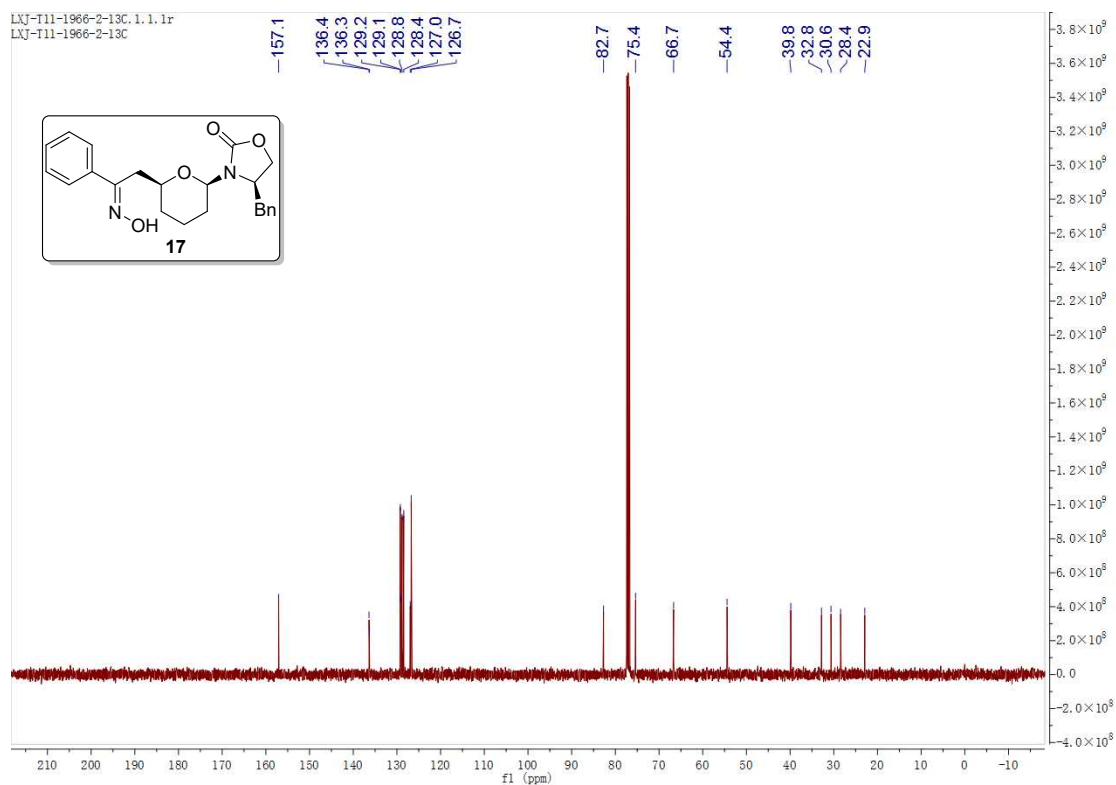

### The <sup>1</sup>H NMR spectrum of 18 (400 MHz, CDCl<sub>3</sub>)

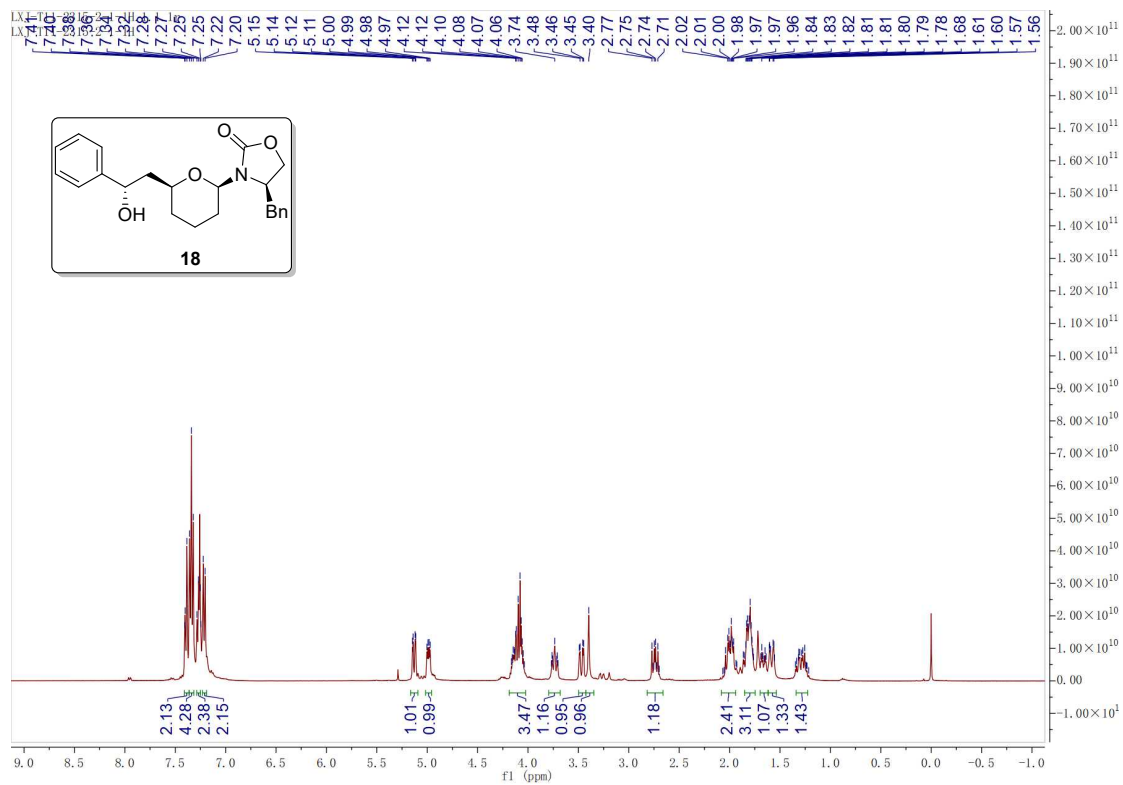

### The $^{13}\text{C}$ NMR spectrum of 18 (101 MHz, $\text{CDCl}_3$ )

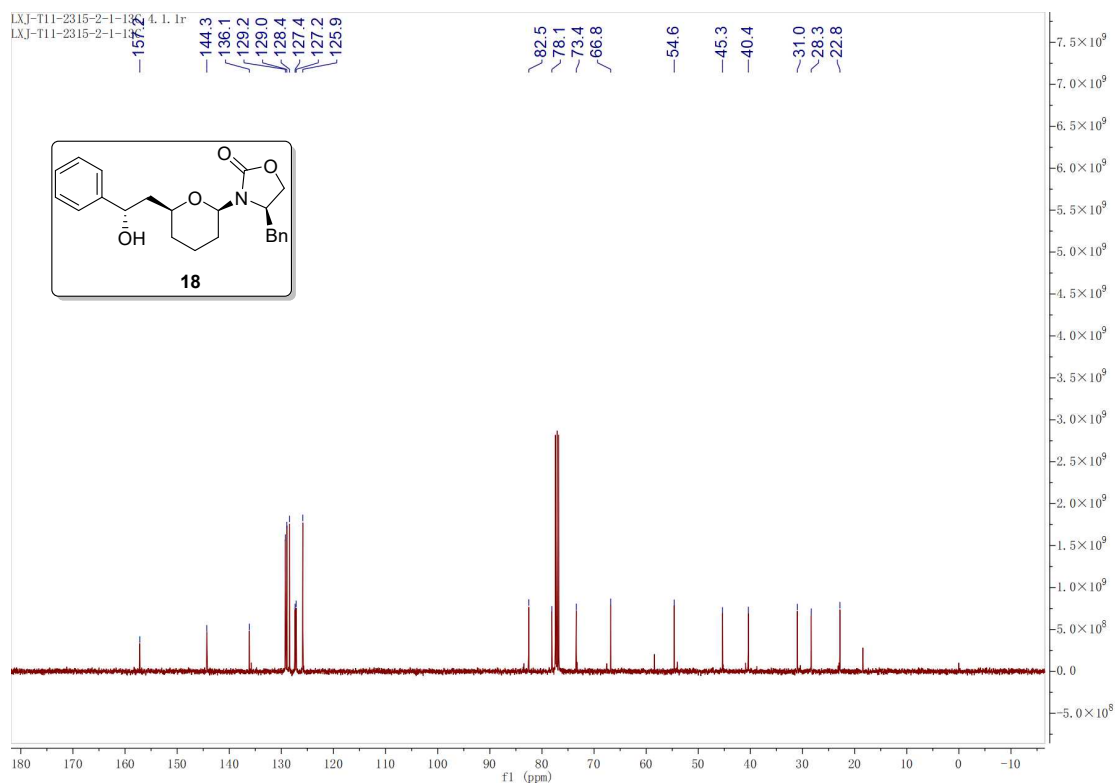

### The $^1\text{H}$ NMR spectrum of 19 (400 MHz, $\text{CDCl}_3$ )

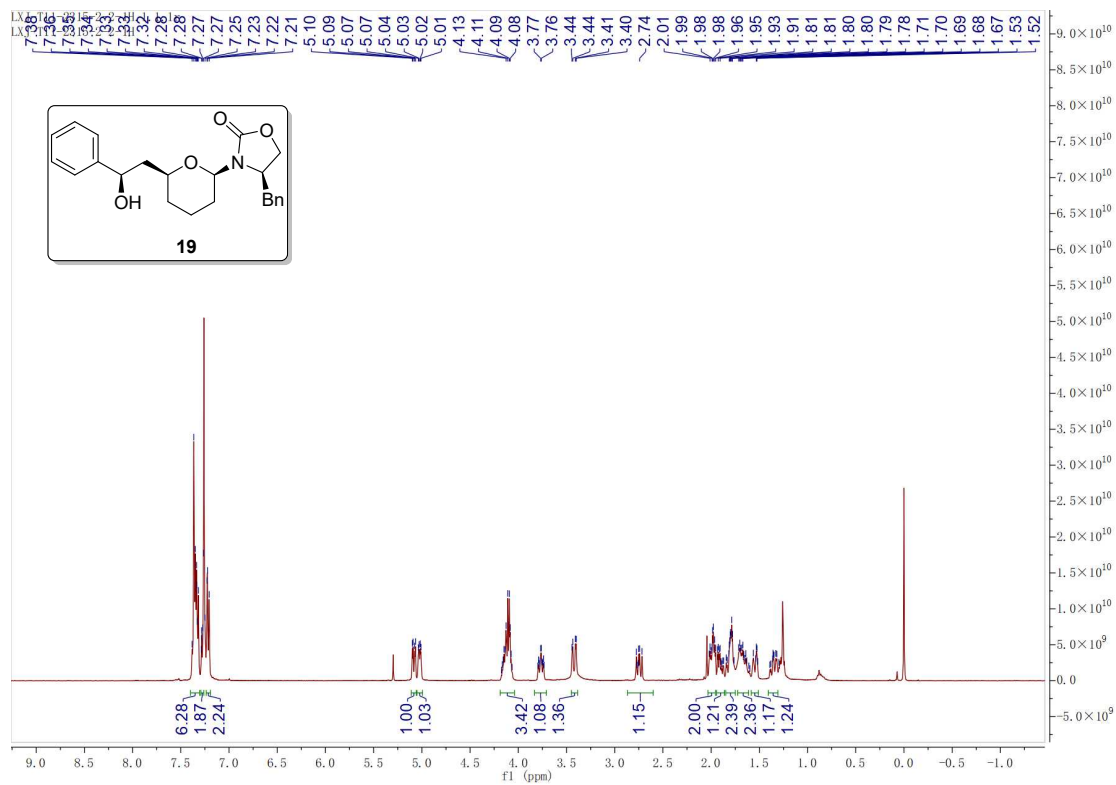

### The $^{13}\text{C}$ NMR spectrum of 19 (101 MHz, $\text{CDCl}_3$ )

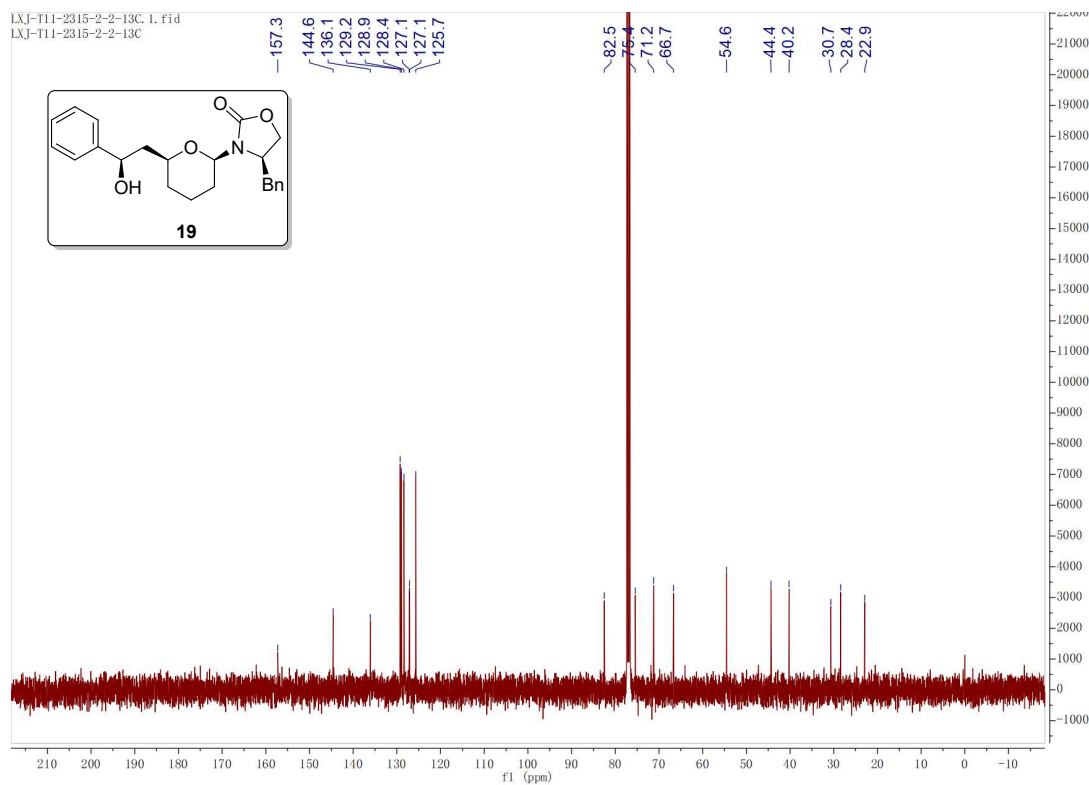

### The $^1\text{H}$ NMR spectrum of 20 (400 MHz, $\text{CDCl}_3$ )

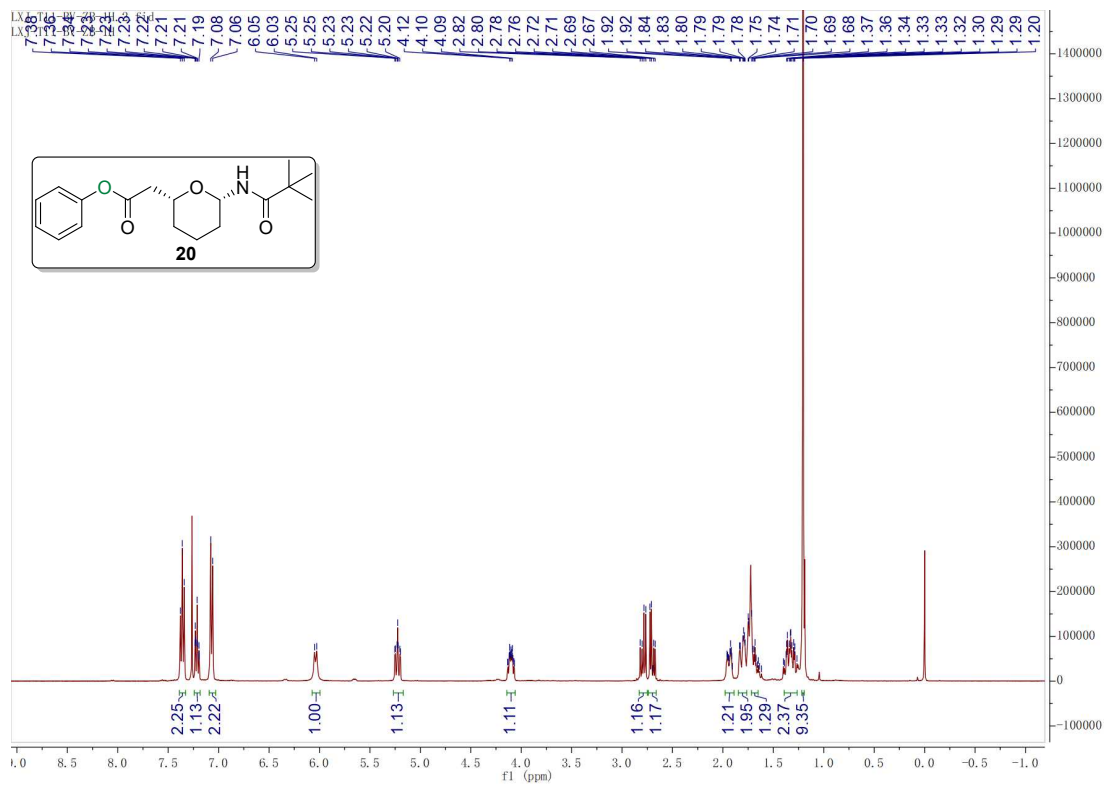

## The $^{13}\text{C}$ NMR spectrum of 20 (101 MHz, $\text{CDCl}_3$ )

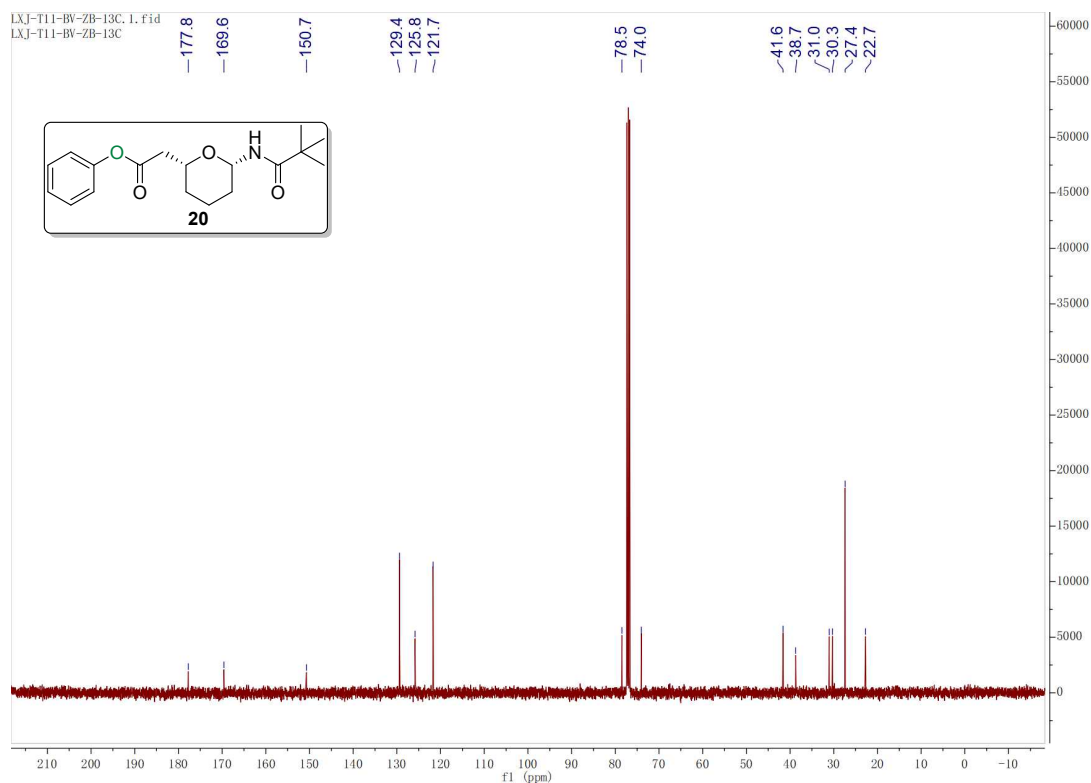

## The HPLC of racemic 20

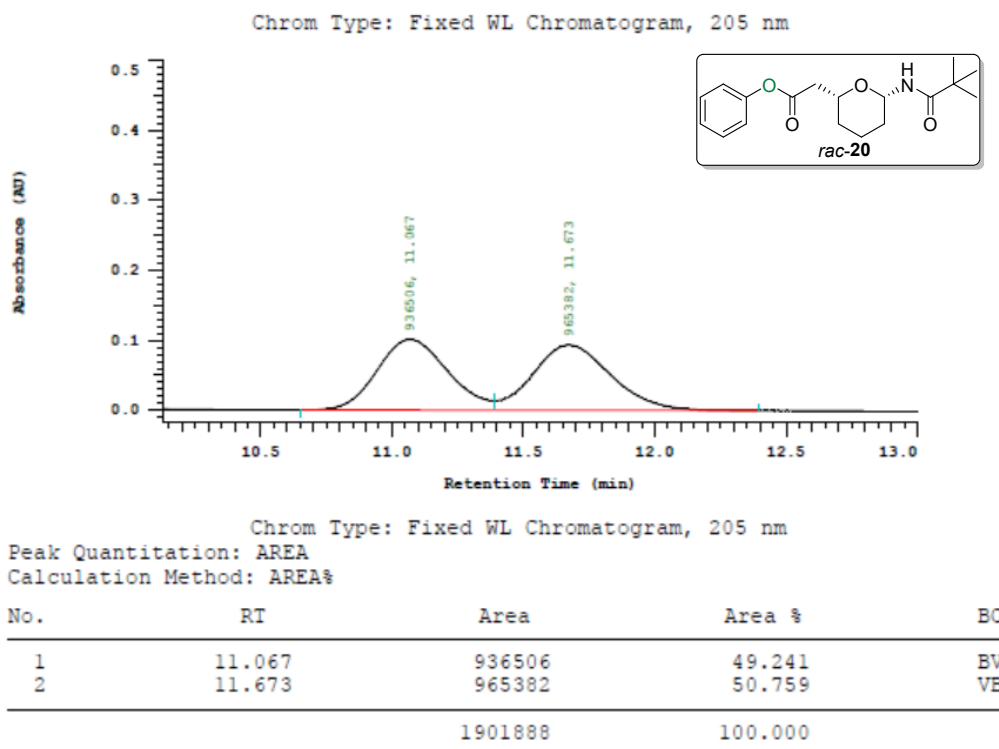

## The HPLC of chiral 20

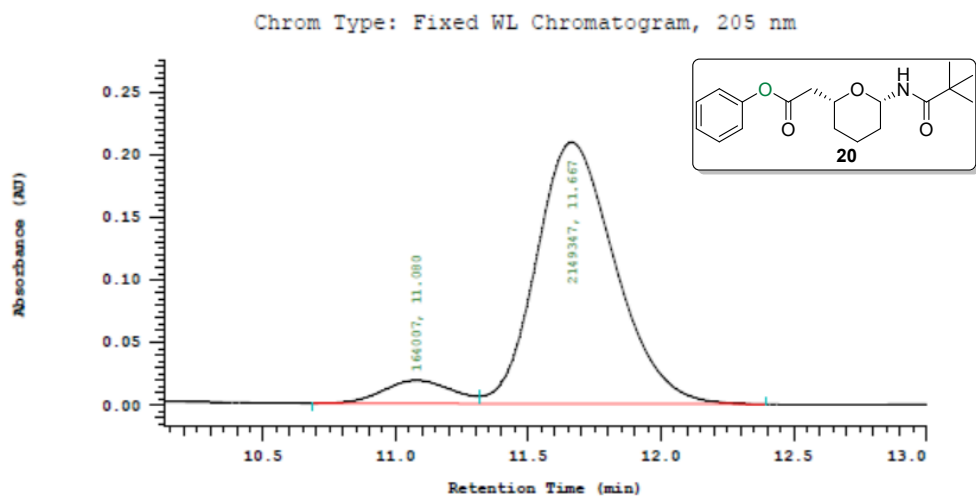

Chrom Type: Fixed WL Chromatogram, 205 nm  
Peak Quantitation: AREA  
Calculation Method: AREA%

| No. | RT     | Area    | Area %  | BC |
|-----|--------|---------|---------|----|
| 1   | 11.080 | 164007  | 7.090   | BV |
| 2   | 11.667 | 2149347 | 92.910  | VB |
|     |        | 2313354 | 100.000 |    |

## The <sup>1</sup>H NMR spectrum of 21a (400 MHz, CDCl<sub>3</sub>)

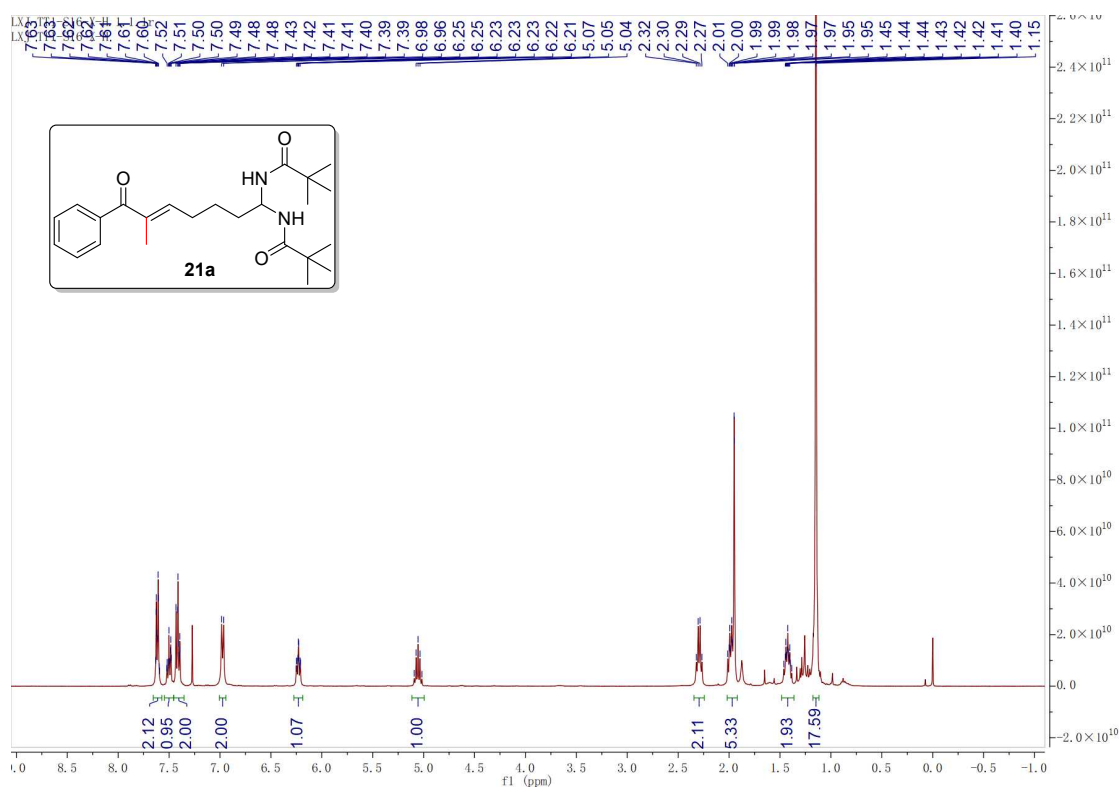

### The $^{13}\text{C}$ NMR spectrum of 21a (101 MHz, $\text{CDCl}_3$ )

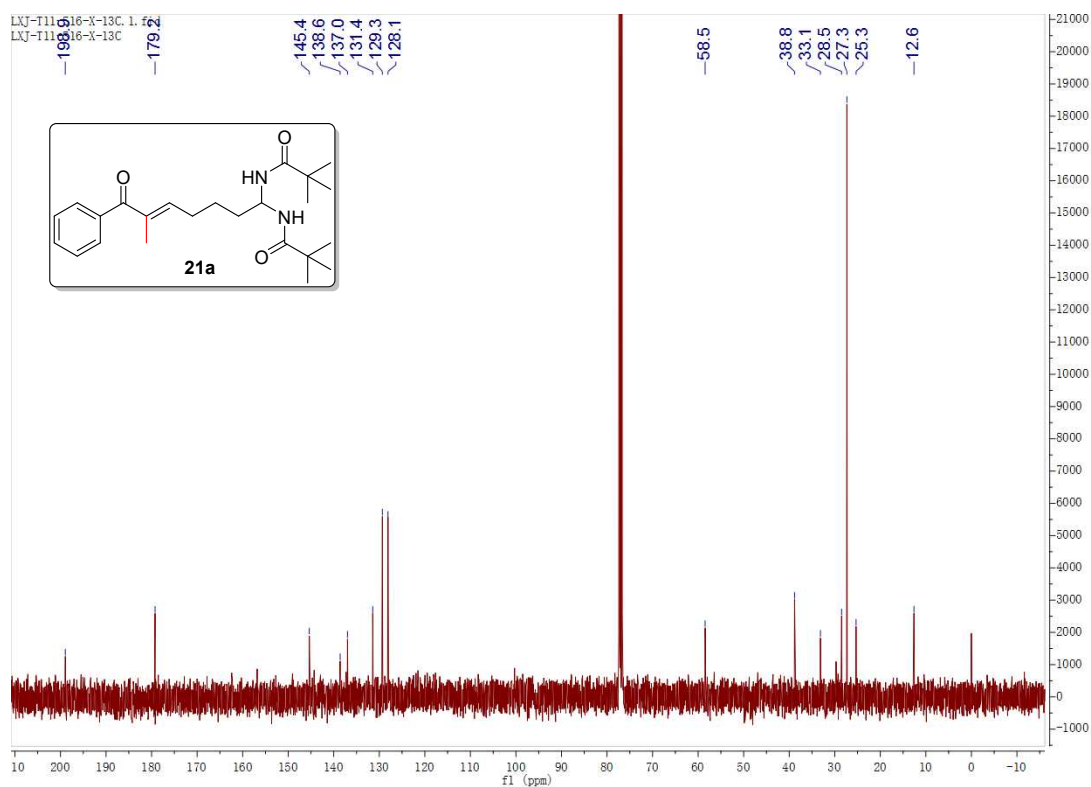

### The $^1\text{H}$ NMR spectrum of 21b (500 MHz, $\text{CDCl}_3$ )

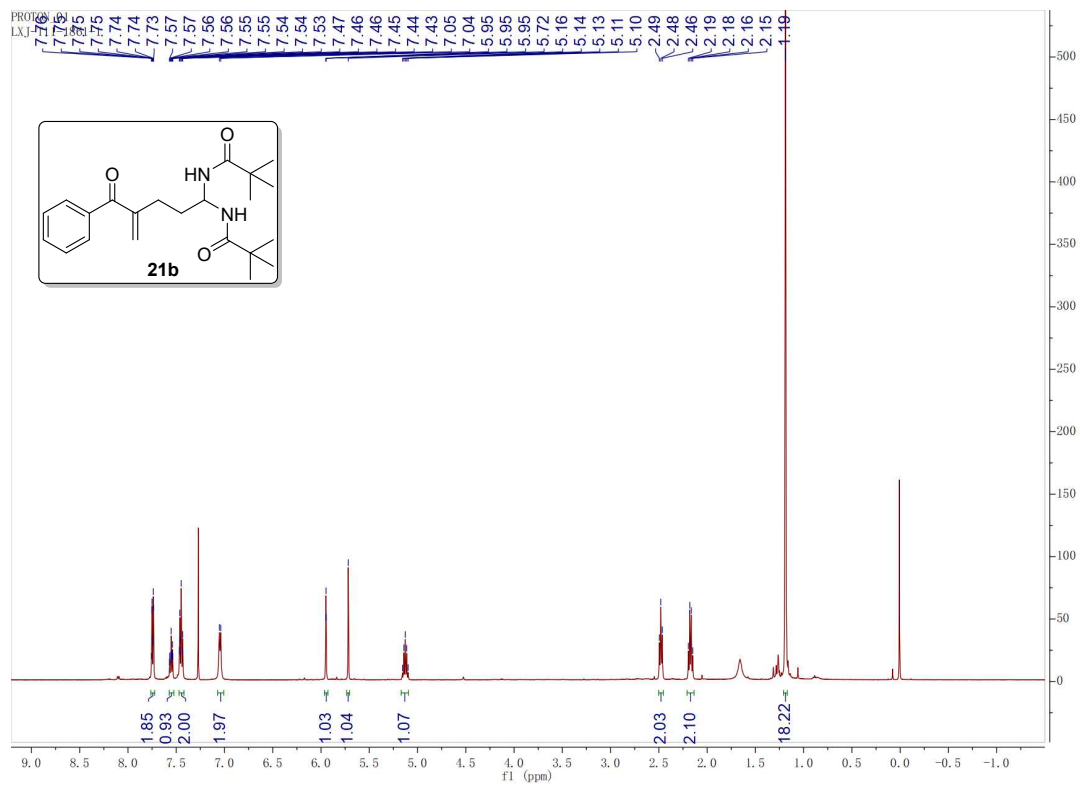

**The  $^{13}\text{C}$  NMR spectrum of 21b (101 MHz,  $\text{CDCl}_3$ )**

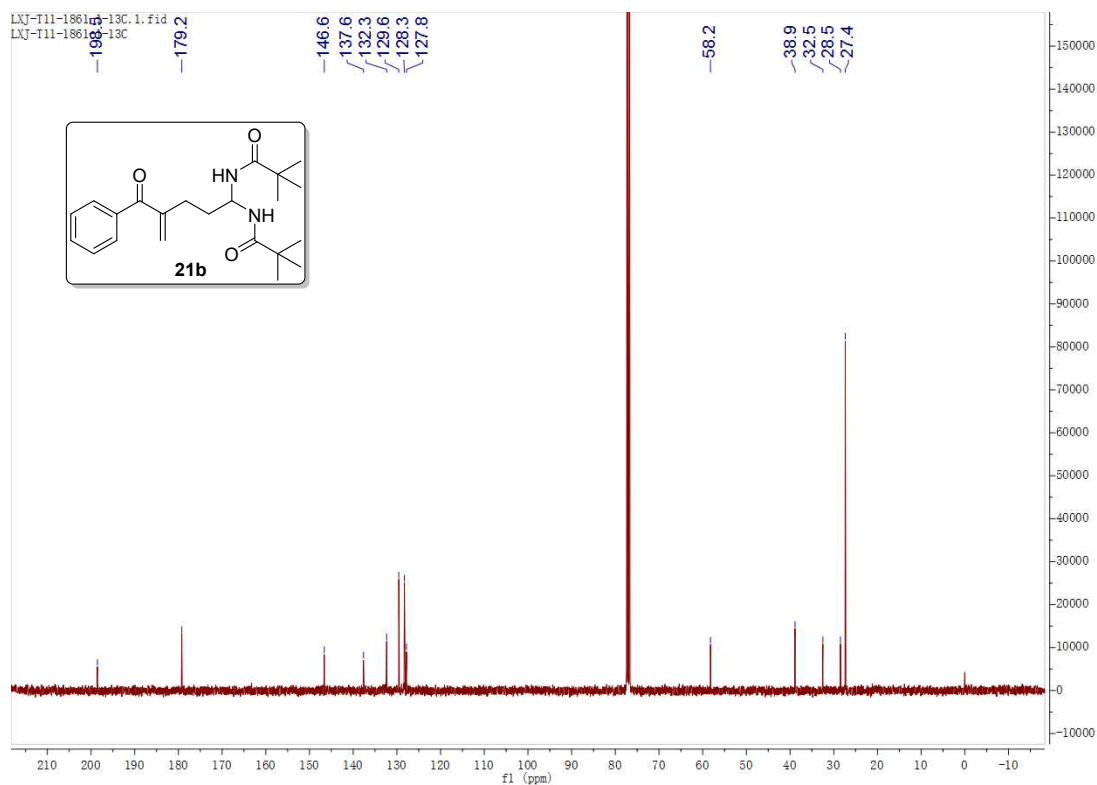

**The  $^1\text{H}$  NMR spectrum of 21c (500 MHz,  $\text{CDCl}_3$ )**

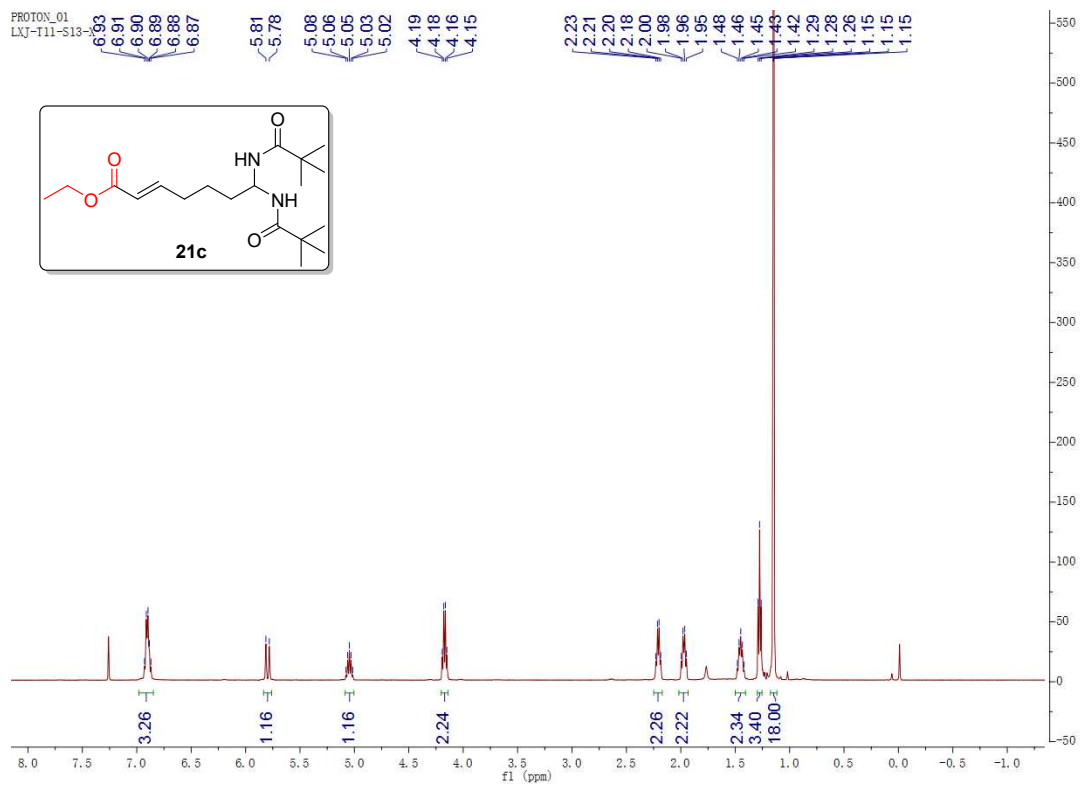



### The <sup>13</sup>C NMR spectrum of 21c (101 MHz, CDCl<sub>3</sub>)

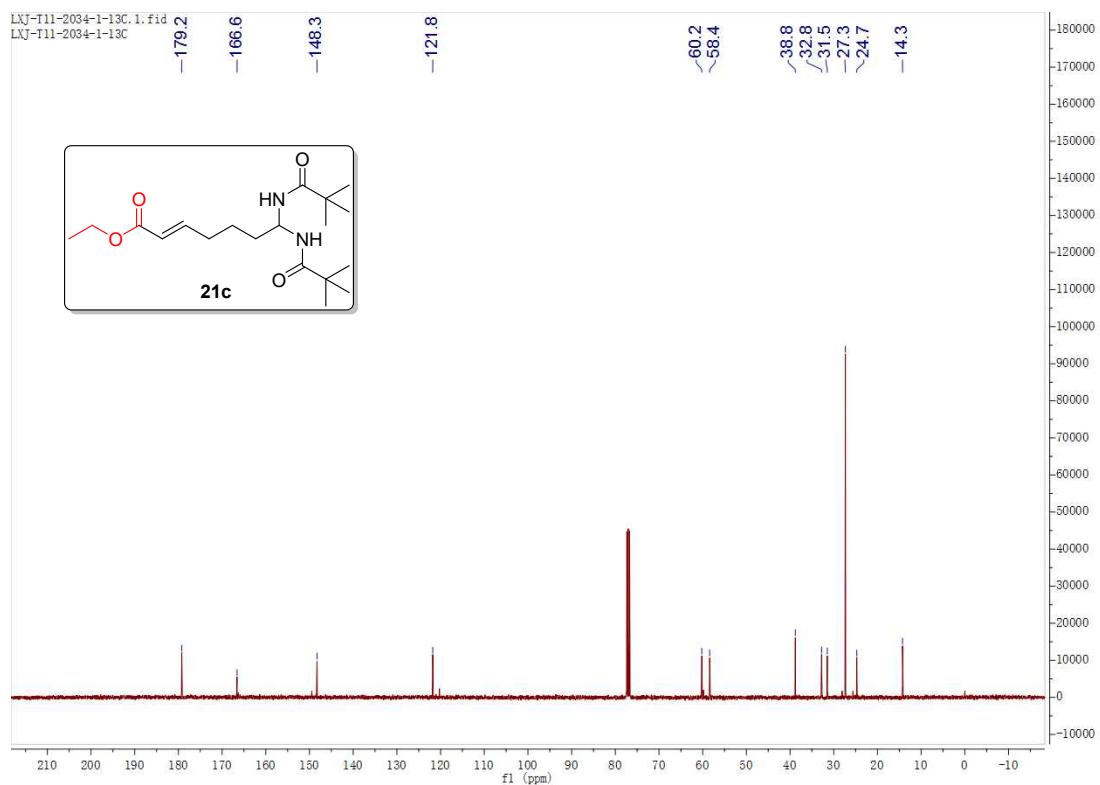

### The <sup>1</sup>H NMR spectrum of 21d (400 MHz, CDCl<sub>3</sub>)

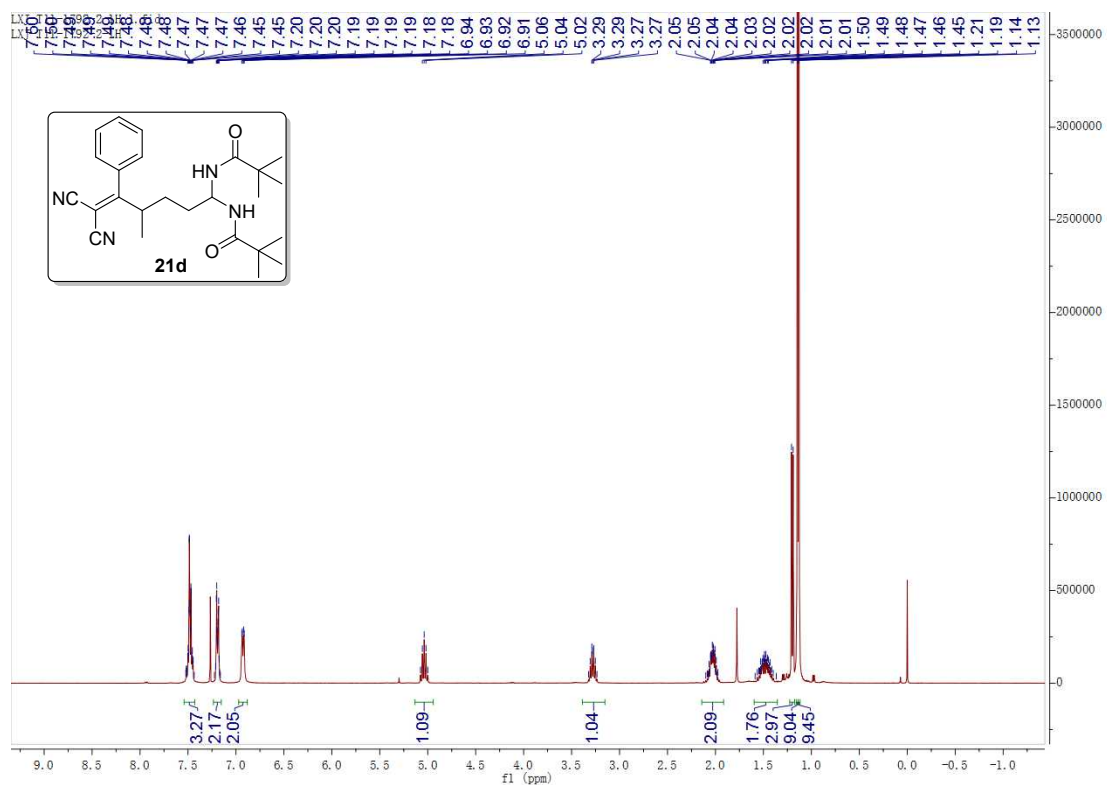

### The <sup>13</sup>C NMR spectrum of 21d (101 MHz, CDCl<sub>3</sub>)

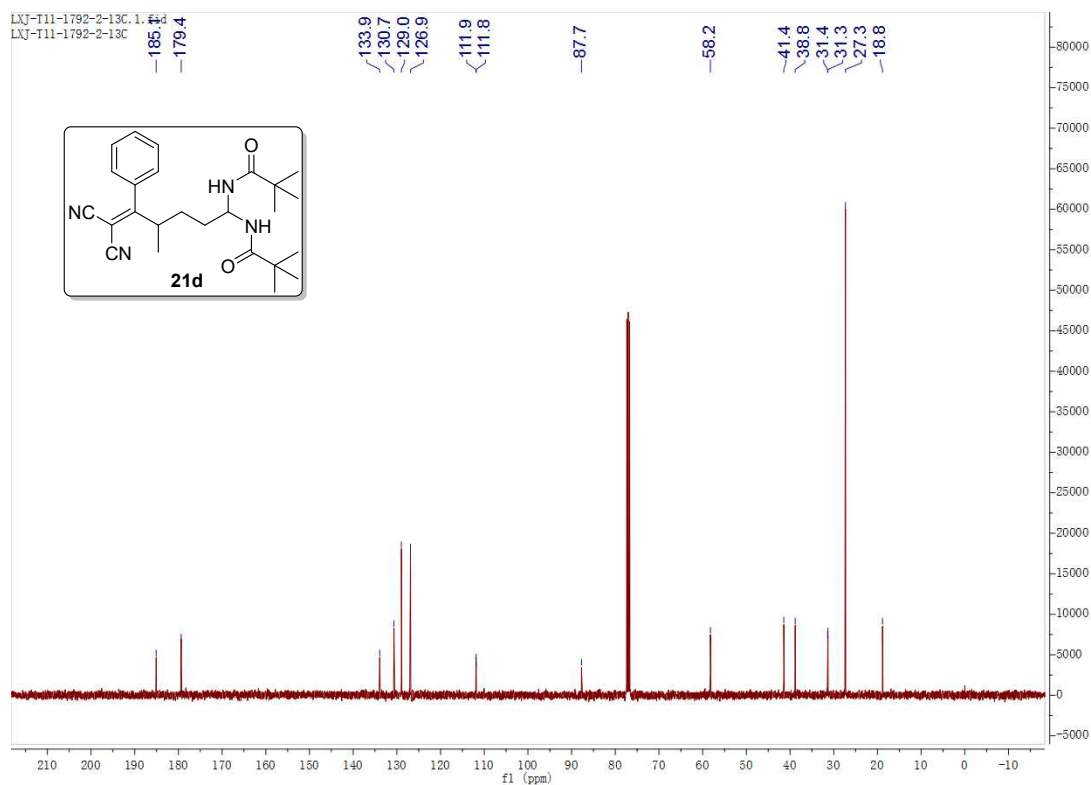

### The <sup>1</sup>H NMR spectrum of 21e (400 MHz, CDCl<sub>3</sub>)

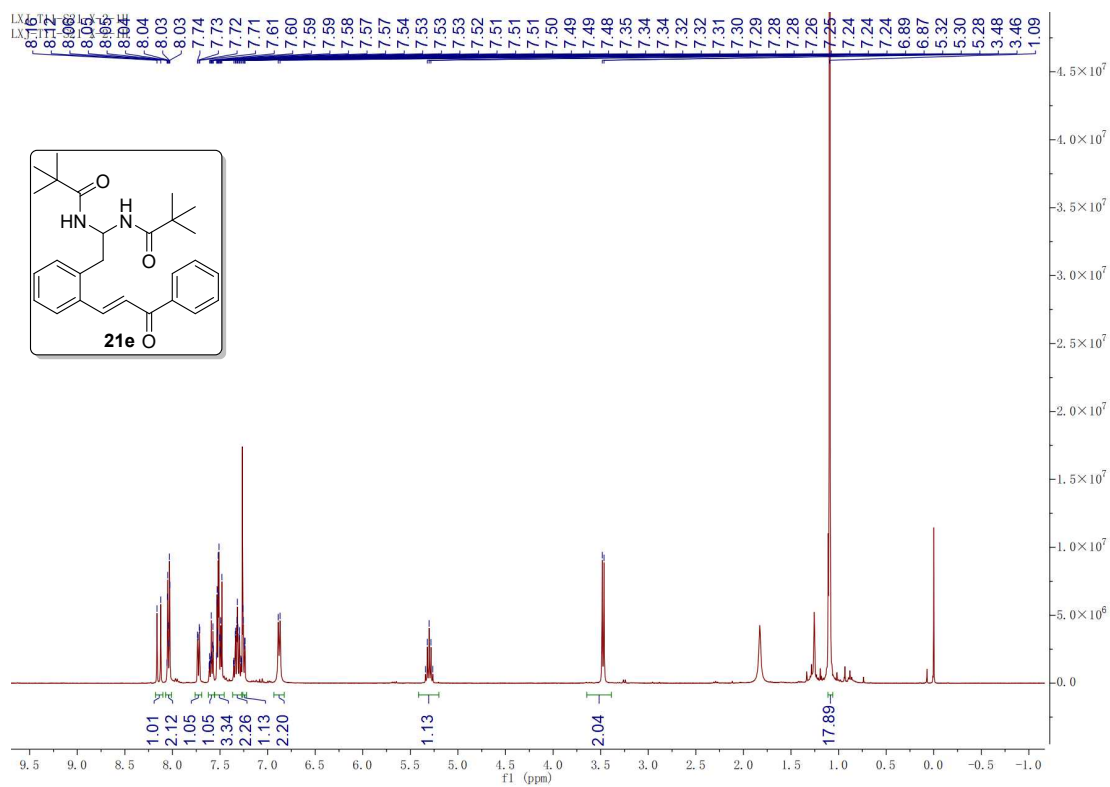

### The $^{13}\text{C}$ NMR spectrum of 21e (101 MHz, $\text{CDCl}_3$ )

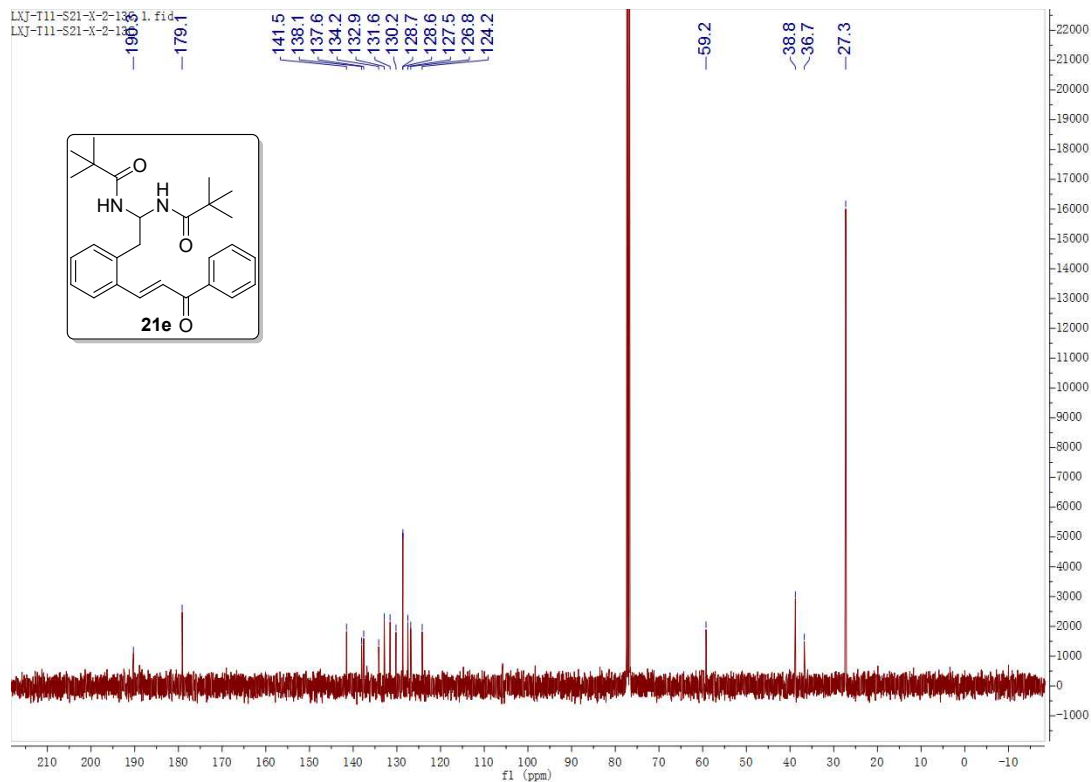

### The $^1\text{H}$ NMR spectrum of 21e' (400 MHz, $\text{CDCl}_3$ )

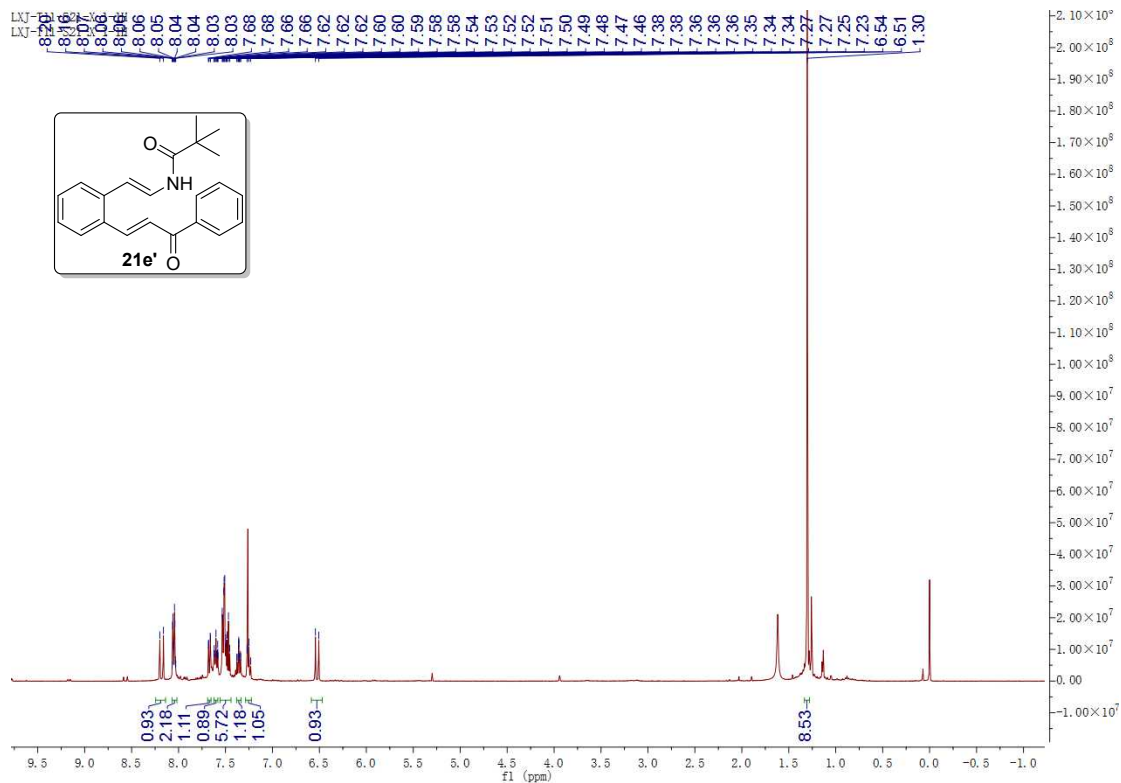

### The <sup>13</sup>C NMR spectrum of 21e' (101 MHz, CDCl<sub>3</sub>)

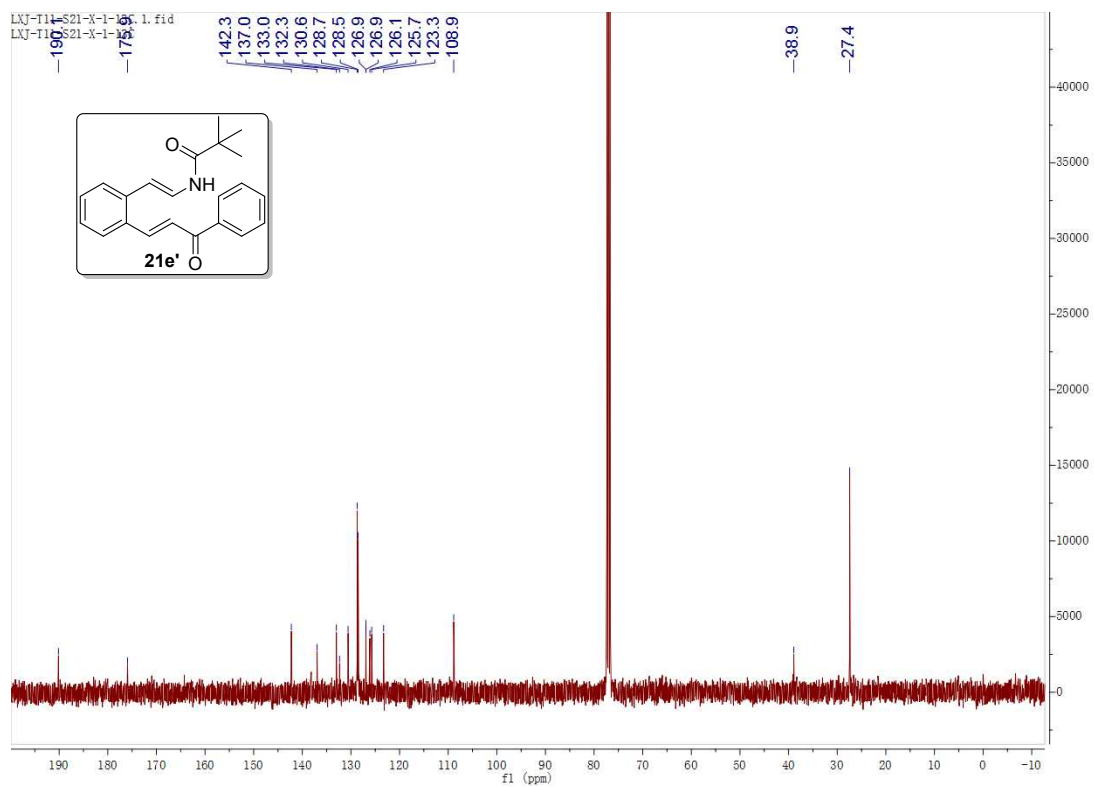

## R. Single crystal X-Ray diffraction data:

The absolute configuration of compound **3af** (CCDC 2092457), **17** (CCDC 2092460) and the relative configuration of **(±)-3aj** (CCDC 2092458), **(±)-16** (CCDC 2092459) were unambiguously assigned by single crystal X-ray analysis. These data can be obtained free of charge from The Cambridge Crystallographic Data Centre via [www.ccdc.cam.ac.uk/data\\_request/cif](http://www.ccdc.cam.ac.uk/data_request/cif)].

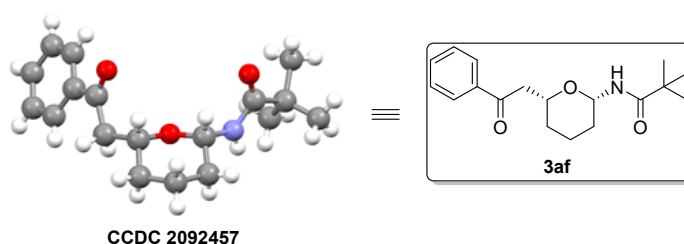

Table S6. Crystal data and structure refinement for **3af** (CCDC 2092457)

|                                 |                                                                                               |
|---------------------------------|-----------------------------------------------------------------------------------------------|
| Identification code             | exp_11382                                                                                     |
| Empirical formula               | C <sub>9</sub> H <sub>12.50</sub> N <sub>0.50</sub> O <sub>1.50</sub>                         |
| Formula weight                  | 151.69                                                                                        |
| Temperature                     | 293(2) K                                                                                      |
| Wavelength                      | 1.54184 Å                                                                                     |
| Crystal system                  | Orthorhombic                                                                                  |
| Space group                     | P 21 21 21                                                                                    |
| Unit cell dimensions            | a = 5.63303(18) Å    α = 90 °<br>b = 9.7271(3) Å    β = 90 °<br>c = 32.2704(12) Å    γ = 90 ° |
| Volume                          | 1768.20(11) Å <sup>3</sup>                                                                    |
| Z                               | 8                                                                                             |
| Density (calculated)            | 1.140 Mg/m <sup>3</sup>                                                                       |
| Absorption coefficient          | 0.615 mm <sup>-1</sup>                                                                        |
| F(000)                          | 656                                                                                           |
| Crystal size                    | 0.120 x 0.120 x 0.110 mm <sup>3</sup>                                                         |
| Radiation                       | CuKα (λ = 1.54184)                                                                            |
| Theta range for data collection | 2.739 to 67.218 °                                                                             |
| Index ranges                    | -6 ≤ h ≤ 3, -10 ≤ k ≤ 11, -36 ≤ l ≤ 38                                                        |
| Reflections collected           | 3735                                                                                          |

|                                   |                                             |
|-----------------------------------|---------------------------------------------|
| Independent reflections           | 2694 [R(int) = 0.0161]                      |
| Completeness to theta = 67.218°   | 99.7 %                                      |
| Absorption correction             | Semi-empirical from equivalents             |
| Max. and min. transmission        | 1.00000 and 0.96380                         |
| Refinement method                 | Full-matrix least-squares on F <sup>2</sup> |
| Data / restraints / parameters    | 2694 / 648 / 234                            |
| Goodness-of-fit on F <sup>2</sup> | 1.068                                       |
| Final R indices [I > 2σ(I)]       | R1 = 0.0439, wR2 = 0.1232                   |
| R indices (all data)              | R1 = 0.0479, wR2 = 0.1274                   |
| Absolute structure parameter      | -0.12(14)                                   |
| Extinction coefficient            | 0.0128(12)                                  |
| Largest diff. peak and hole       | 0.220 and -0.136 e. Å <sup>-3</sup>         |

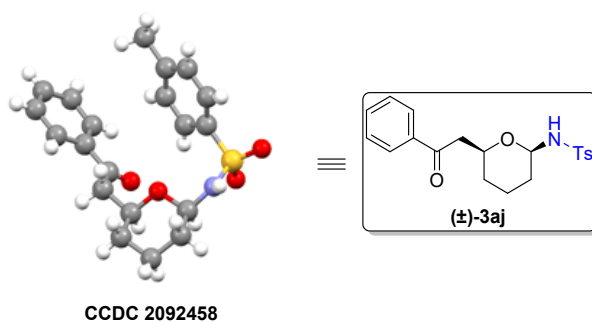

Table S7. Crystal data and structure refinement for **(±)-3aj** (CCDC 2092458)

|                        |                                                                                                                      |
|------------------------|----------------------------------------------------------------------------------------------------------------------|
| Identification code    | exp_11421                                                                                                            |
| Empirical formula      | C <sub>20</sub> H <sub>23</sub> N O <sub>4</sub> S                                                                   |
| Formula weight         | 373.45                                                                                                               |
| Temperature            | 293(2) K                                                                                                             |
| Wavelength             | 1.54184 Å                                                                                                            |
| Crystal system         | Triclinic                                                                                                            |
| Space group            | P-1                                                                                                                  |
| Unit cell dimensions   | a = 8.3710(8) Å    α = 72.860(11) °<br>b = 11.0434(13) Å    β = 70.943(10) °<br>c = 11.6957(15) Å    γ = 76.348(9) ° |
| Volume                 | 964.8(2) Å <sup>3</sup>                                                                                              |
| Z                      | 2                                                                                                                    |
| Density (calculated)   | 1.286 Mg/m <sup>3</sup>                                                                                              |
| Absorption coefficient | 1.694 mm <sup>-1</sup>                                                                                               |

|                                    |                                                                       |
|------------------------------------|-----------------------------------------------------------------------|
| F(000)                             | 396                                                                   |
| Crystal size                       | 0.120 x 0.120 x 0.110 mm <sup>3</sup>                                 |
| Radiation                          | CuK $\alpha$ ( $\lambda$ = 1.54184)                                   |
| Theta range for data collection    | 4.116 to 67.249 °                                                     |
| Index ranges                       | -10 $\leq$ h $\leq$ 8, -12 $\leq$ k $\leq$ 13, -12 $\leq$ l $\leq$ 13 |
| Reflections collected              | 5734                                                                  |
| Independent reflections            | 3337 [R(int) = 0.0345]                                                |
| Completeness to theta = 67.249°    | 96.8 %                                                                |
| Absorption correction              | Semi-empirical from equivalents                                       |
| Max. and min. transmission         | 1.00000 and 0.80462                                                   |
| Refinement method                  | Full-matrix least-squares on F <sup>2</sup>                           |
| Data / restraints / parameters     | 3337 / 1 / 236                                                        |
| Goodness-of-fit on F <sup>2</sup>  | 0.941                                                                 |
| Final R indices [I>2 $\sigma$ (I)] | R1 = 0.0672, wR2 = 0.2758                                             |
| R indices (all data)               | R1 = 0.1008, wR2 = 0.3122                                             |
| Extinction coefficient             | n/a                                                                   |
| Largest diff. peak and hole        | 0.283 and -0.580 e. Å <sup>-3</sup>                                   |

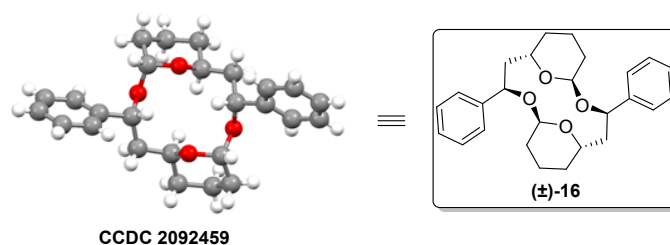

Table S8. Crystal data and structure refinement for **(±)-16** – CCDC 2092459

|                      |                                                |                        |
|----------------------|------------------------------------------------|------------------------|
| Identification code  | HX-LXJ-1478-H-300K                             |                        |
| Empirical formula    | C <sub>26</sub> H <sub>32</sub> O <sub>4</sub> |                        |
| Formula weight       | 408.51                                         |                        |
| Temperature          | 299.99(10) K                                   |                        |
| Crystal system       | Monoclinic                                     |                        |
| Space group          | C2/c                                           |                        |
| Unit cell dimensions | a = 16.4248(9) Å                               | $\alpha$ = 90 °        |
|                      | b = 13.2124(7) Å                               | $\beta$ = 106.465(6) ° |
|                      | c = 10.8402(6) Å                               | $\gamma$ = 90 °        |
| Volume               | 2256.0(2) Å <sup>3</sup>                       |                        |
| Z                    | 4                                              |                        |

|                                   |                                           |
|-----------------------------------|-------------------------------------------|
| Density (calculated)              | 1.203 Mg/m <sup>3</sup>                   |
| Absorption coefficient            | 0.080 mm <sup>-1</sup>                    |
| F(000)                            | 880.0                                     |
| Crystal size                      | 0.18 × 0.12 × 0.11 mm <sup>3</sup>        |
| Radiation                         | MoK $\alpha$ ( $\lambda$ = 0.71073)       |
| Theta range for data collection   | 4.024 to 50.014 °                         |
| Index ranges                      | -19 ≤ h ≤ 19, -15 ≤ k ≤ 15, -12 ≤ l ≤ 11  |
| Reflections collected             | 7456                                      |
| Independent reflections           | 1993 [R(int) = 0.0187, R(sigma) = 0.0183] |
| Data / restraints / parameters    | 1993/0/136                                |
| Goodness-of-fit on F <sup>2</sup> | 1.046                                     |
| Final R indices [I > 2sigma(I)]   | R1 = 0.0343, wR2 = 0.0835                 |
| R indices (all data)              | R1 = 0.0410, wR2 = 0.0888                 |
| Largest diff. peak and hole       | 0.11 and -0.15 e. Å <sup>-3</sup>         |

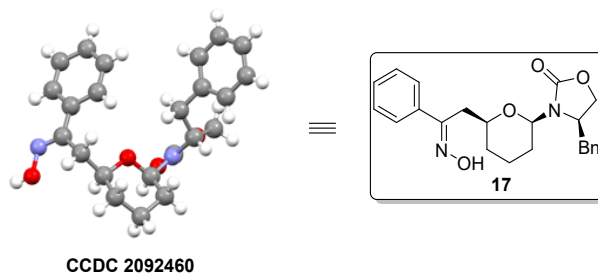

Table S9. Crystal data and structure refinement for **17** (CCDC 2092460)

|                      |                                                                                                                |
|----------------------|----------------------------------------------------------------------------------------------------------------|
| Identification code  | 11912                                                                                                          |
| Empirical formula    | C <sub>23</sub> H <sub>26</sub> N <sub>2</sub> O <sub>4</sub>                                                  |
| Formula weight       | 394.46                                                                                                         |
| Temperature          | 293(2) K                                                                                                       |
| Wavelength           | 1.54178 Å                                                                                                      |
| Crystal system       | Monoclinic                                                                                                     |
| Space group          | P2(1)                                                                                                          |
| Unit cell dimensions | a = 6.3340(3) Å $\alpha$ = 90 °<br>b = 16.7436(8) Å $\beta$ = 100.883(6) °<br>c = 10.0625(6) Å $\gamma$ = 90 ° |
| Volume               | 1047.97(10) Å <sup>3</sup>                                                                                     |
| Z                    | 2                                                                                                              |
| Density (calculated) | 1.250 Mg/m <sup>3</sup>                                                                                        |



---

|                                   |                                             |
|-----------------------------------|---------------------------------------------|
| Absorption coefficient            | 0.696 mm <sup>-1</sup>                      |
| F(000)                            | 420                                         |
| Crystal size                      | 0.120 x 0.120 x 0.110 mm <sup>3</sup>       |
| Radiation                         | CuKα (λ = 1.54178)                          |
| Theta range for data collection   | 4.474 to 67.230 °                           |
| Index ranges                      | -7<=h<=7, -17<=k<=19, -11<=l<=12            |
| Reflections collected             | 3598                                        |
| Independent reflections           | 2712 [R(int) = 0.0378]                      |
| Completeness to theta = 67.230°   | 99.8 %                                      |
| Refinement method                 | Full-matrix least-squares on F <sup>2</sup> |
| Data / restraints / parameters    | 2712 / 1 / 263                              |
| Goodness-of-fit on F <sup>2</sup> | 1.008                                       |
| Final R indices [I>2sigma(I)]     | R1 = 0.0486, wR2 = 0.0986                   |
| R indices (all data)              | R1 = 0.0727, wR2 = 0.1131                   |
| Absolute structure parameter      | -0.1(3)                                     |
| Extinction coefficient            | n/a                                         |
| Largest diff. peak and hole       | 0.136 and -0.174 e. Å <sup>-3</sup>         |

---

## S. Reference:

- [1] Parella, R.; Jakkampudi, S.; Arman, H.; Zhao, J. C. G., *Adv. Synth. Catal.* **2019**, *361*, 208.
- [2] Boerth, J. A.; Ellman, J. A., *Chem. Sci.* **2016**, *7*, 1474.
- [3] Quintavalla, A.; Lombardo, M.; Sanap, S. P.; Trombini, C., *Adv. Synth. Catal.* **2013**, *355*, 938.
- [4] Liu, Q.; Rovis, T., *J. Am. Chem. Soc.* **2006**, *128*, 2552.
- [5] Lei, T.; Zhou, C.; Huang, M.-Y.; Zhao, L.-M.; Yang, B.; Ye, C.; Xiao, H.; Meng, Q.-Y.; Ramamurthy, V.; Tung, C.-H.; Wu, L.-Z., *Angew. Chem., Int. Ed.* **2017**, *56*, 15407.
- [6] Fan, Y.-S.; Jiang, Y.-J.; An, D.; Sha, D.; Antilla, J. C.; Zhang, S., *Org. Lett.* **2014**, *16*, 6112.
- [7] Vyas, S.; Muthukrishnan, S.; Kubicki, J.; McCulla, R. D.; Burdzinski, G.; Sliwa, M.; Platz, M. S.; Hadad, C. M., *J. Am. Chem. Soc.* **2010**, *132*, 16796.
- [8] Tietze, L. F.; Hölsken, S.; Adrio, J.; Kinzel, T.; Wegner, C., *Synthesis* **2004**, *2004*, 2236.
- [9] (a) Ghosh, A. K.; Cheng, X., *Org. Lett.* **2011**, *13*, 4108; (b) Gu, Q.; Rong, Z.-Q.; Zheng, C.; You, S.-L., *J. Am. Chem. Soc.* **2010**, *132*, 4056-4057.
- [10] Hoye, T. R.; Hu, M., *J. Am. Chem. Soc.* **2003**, *125*, 9576.
